# Supplementary material for: Integrative Multi-Omics Approach in Vascular Ehlers-Danlos Syndrome: Further Insights into the Disease Mechanisms by Proteomic Analysis of Patient Dermal Fibroblasts
Source: Preprints.org preprint supplement (doi:10.20944/preprints202411.0294.v1), 2024-11-05
Supplement: Supplementary file 1 [file supplementary]

## Sheet: Anlysis report
			Appendix
				Proteome analysis : vEDS vs. control fibroblasts ANALYSIS REPORT
				Sample Number	18
				Sample type	Whole Cell Proteome Free
				MS method	label-free DIA
				Lysate_type	Dermal fibroblasts
				Lysate_origin	Human samples
	General Features		Human Samples: Dermal fibroblast cultures from vEDS patients compared to unrelated healthy donors. The research was carried out according to the Principles of the Declaration of Helsinki. Approval was achieved by the Internal Review Board of the local Ethical Committee (Ethical Committee Protocol Number NP5328, Comitato Etico di Brescia, ASST degli Spedali Civili, Brescia). Dermal fibroblasts cel…
	LC-MS/MS Analysis		Instruments for LC-MS/MS analysis consisted of a NanoLC 1200 coupled via a nano-electrospray ionization source to the quadrupole-based Q Exactive HF benchtop mass spectrometer. For the chromatographic separation, a binary buffer system consisting of solution A: 0.1% formic acid and B: 80% acetonitrile, 0.1% formic acid was used.
	Peptide processing		Peptides were separated according to their hydrophobicity on an analytical column (75 μm) in-house packed with C18-AQ 1.9 μm C18 resin with a gradient of 7–32% solvent B in 45 min, 32–45% B in 5 min, 45–95% B in 3 min, 95–5% B in 5 min at a flow rate of 300 nl/min
	Data extraction process		MS data acquisition was performed in DIA (Data Independent Acquisition) mode using 32 variable windows covering a mass range of 300–1650 m/z. The resolution was set to 60’000 for MS1 and 30’000 for MS2. The AGC was 3e6 in both MS1 and MS2, with a maximum injection time of 60 ms in MS1 and 54 ms in MS2. NCE were set to 25%, 27.5%, 30%.
	Data Analysis		All acquired raw files were processed using Spectronaut Software (2023 up-date). For protein assignment, spectra were correlated with Human database (v. 2023). Searches were performed with tryptic specifications and default settings for mass tolerances for both MS and MS/MS spectra. The other parameters were set as follow: - Fixed modifications: Carbamidomethyl (C) - Variable modifications: Oxida…
	Identified proteins		5485
	After filter (70% in at least one group)		5058
	The output from the procedure		• Original Matrix, containing all proteins identified in all samples, without modifications; • Analysis containing proteome analysis after proteins filtering, missing values imputation and statistical analysis (Anova/t-test)

## Sheet: Total Proteins in all samples
				TOTAL PROTEINS identified by label-free LC-MS/MS analysis
				Samples	Before filter	After filter (70% in at least one group)
				C1	5190	4974
				C2	5090	4939
				C3	5243	5004
				C4	5253	5003
				C5	5196	4993
				C6	5115	4975
				C7	4937	4836
				C8	5168	4976
				C9	5090	4920
				P1	5194	4972
				P2	4921	4808
				P3	5137	4971
				P4	5196	4955
				P5	4439	4361
				P6	5228	4986
				P7	4626	4530
				P8	4944	4783
				P9	5102	4945
	C1-C9 = Healthy donors
	P1-P9 = vEDS patients

## Sheet: Original Matrix
[1] CTRL_C5.PG.Quantity	[2] CTRL_C6.PG.Quantity	[3] CTRL_C8.PG.Quantity	[4] CTRL_C9.PG.Quantity	[5] CTRL_C10.PG.Quantity	[6] CTRL_C11.PG.Quantity	[7] CTRL_C14.PG.Quantity	[8] CTRL_AB18.PG.Quantity	[9] CTRL_AB19.PG.Quantity	[10] vEDS_14.PG.Quantity	[11] vEDS_120.PG.Quantity	[12] vEDS_173.PG.Quantity	[13] vEDS_854.PG.Quantity	[14] vEDS_1088.PG.Quantity	[15] vEDS_1148.PG.Quantity	[16] vEDS_1155.PG.Quantity	[17] vEDS_2327.PG.Quantity	[18] vEDS_2328.PG.Quantity	T: [1] CTRL_5.PG.NrOfPrecursorsUsedForQuantification	T: [2] CTRL_6.PG.NrOfPrecursorsUsedForQuantification	T: [3] CTRL_8.PG.NrOfPrecursorsUsedForQuantification	T: [4] CTRL_9.PG.NrOfPrecursorsUsedForQuantification	T: [5] CTRL_10.PG.NrOfPrecursorsUsedForQuantification	T: [6] CTRL_11.PG.NrOfPrecursorsUsedForQuantification	T: [7] CTRL_14.PG.NrOfPrecursorsUsedForQuantification	T: [8] CTRL_AB18.PG.NrOfPrecursorsUsedForQuantification	T: [9] CTRL_AB19.PG.NrOfPrecursorsUsedForQuantification	T: [10] EDS_14.PG.NrOfPrecursorsUsedForQuantification	T: [11] EDS_120.PG.NrOfPrecursorsUsedForQuantification	T: [12] EDS_173.PG.NrOfPrecursorsUsedForQuantification	T: [13] EDS_854.PG.NrOfPrecursorsUsedForQuantification	T: [14] EDS_1088.PG.NrOfPrecursorsUsedForQuantification	T: [15] EDS_1148.PG.NrOfPrecursorsUsedForQuantification	T: [16] EDS_1155.PG.NrOfPrecursorsUsedForQuantification	T: [17] EDS_2327.PG.NrOfPrecursorsUsedForQuantification	T: [18] EDS_2328.PG.NrOfPrecursorsUsedForQuantification	T: PG.ProteinGroups	T: PG.ProteinAccessions	T: PG.Organisms	T: PG.ProteinNames	T: PG.ProteinDescriptions	T: PG.Genes
10876.5	10207.6	6806.12	5284.14	18344.5	20652.6	30427.8	17501.6	19554.8	4566.38	77423.1	24916.4	5120.72	339625	14809.1	110340	11091	47190.2	1	1	1	1	1	1	1	1	1	1	1	1	1	1	1	1	1	1	M0R009;P04217;P04217-2	M0R009;P04217;P04217-2	Homo sapiens	M0R009_HUMAN;A1BG_HUMAN;A1BG_HUMAN	Isoform of P04217, Alpha-1-B glycoprotein (Fragment);Alpha-1B-glycoprotein;Isoform of P04217, Isoform 2 of Alpha-1B-glycoprotein	A1BG
711407	301725	218689	238968	528749	425798	366105	752353	242414	184801	1839090	185258	151341	1410720	204578	2451500	830479	257892	9	6	9	7	9	8	10	9	9	8	9	7	5	8	10	10	8	8	P01023	P01023	Homo sapiens	A2MG_HUMAN	Alpha-2-macroglobulin	A2M
6812.7	4947.1	5042.91	5290.9	8513.26	4090.97	3904.28	6526.4	11369.4	6743.42	5400.41	5053.87	4711.31	8636.61	4788.49	5220.59	2005.1	6991.86	2	2	2	2	2	2	2	2	2	2	2	2	2	2	2	1	2	2	F8VZ44;H3BU82;Q9NRG9	F8VZ44;H3BU82;Q9NRG9	Homo sapiens	F8VZ44_HUMAN;H3BU82_HUMAN;AAAS_HUMAN	Isoform of Q9NRG9, Aladin WD repeat nucleoporin;Isoform of Q9NRG9, Aladin WD repeat nucleoporin (Fragment);Aladin	AAAS
8236.08	9447.06	7349.31	8002.76	9458.54	9820.71	6841.64	10486.8	7390.41	8937.15	8285.09	9836.13	8468.69	9083.61	10189.4	6791.82	8689.96	8562.05	6	6	6	7	5	6	5	6	5	5	5	7	6	3	8	3	6	7	Q86V21	Q86V21	Homo sapiens	AACS_HUMAN	Acetoacetyl-CoA synthetase	AACS
24552.3	22720	28553.9	26684.3	25374.8	22975.2	18409.4	25324.5	21824	26084	22200.4	22431.1	27636.5	17883.8	23580.5	21746	26345.3	22675.7	21	22	24	24	22	22	22	22	20	24	18	21	23	15	22	17	20	20	A0A096LP25	A0A096LP25	Homo sapiens	A0A096LP25_HUMAN	Isoform of Q2M2I8, AP2 associated kinase 1	AAK1
8093.75	8849.95	9161.18	6767.1	7255.77	9042.36	8192.54	10767.1	7423.77	8877.56	9215.73	6827.3	10100.9	4934.07	10379.1	11350.4	15068.5	5392.87	6	6	6	6	6	6	6	6	6	6	6	6	6	6	6	6	6	6	E9PNP3;Q9H7C9	E9PNP3;Q9H7C9	Homo sapiens	E9PNP3_HUMAN;AAMDC_HUMAN	Isoform of Q9H7C9, Mth938 domain-containing protein;Mth938 domain-containing protein	AAMDC
7192.25	8759.23	9096.79	5692.06	7718.02	8896.16	9331.96	8255.65	10801.6	7485.86	11068.9	10980.2	8043.82	14793.9	10938	10769.2	8066.96	12660.1	6	7	7	6	7	7	5	7	5	7	5	7	7	4	6	5	5	6	C9JEH3;C9JG97;Q13685	C9JEH3;C9JG97;Q13685	Homo sapiens	C9JEH3_HUMAN;C9JG97_HUMAN;AAMP_HUMAN	Isoform of Q13685, Angio associated migratory cell protein;Isoform of Q13685, Angio associated migratory cell protein;Angio-associated migratory cell protein	AAMP
3065.21	639.912	2368.17	3665.31	3732.29	3517.55	2124.45	2530.47	2812.27	3455.12	2430.76	2877.29	2613.2	NaN	2602.15	3610.81	2504	1875.53	3	2	3	2	2	3	2	3	3	3	2	3	2	0	2	1	2	2	A0A7P0T8J7;A0A7P0TA70;A2A2Q9;Q9Y312	A0A7P0T8J7;A0A7P0TA70;A2A2Q9;Q9Y312	Homo sapiens	A0A7P0T8J7_HUMAN;A0A7P0TA70_HUMAN;A2A2Q9_HUMAN;AAR2_HUMAN	Isoform of Q9Y312, Protein AAR2 homolog;Isoform of Q9Y312, Protein AAR2 homolog;Isoform of Q9Y312, Protein AAR2 homolog;Protein AAR2 homolog	AAR2
52468.1	47685	55765.1	57042	44690.4	51551.9	39552.1	44490.6	35565.2	50804.4	41770.2	46853.3	44192.4	51151.7	46649.6	37887.9	35522.2	54883.6	44	46	54	53	44	49	40	45	43	55	40	52	48	28	52	33	42	48	A0A6Q8PF33;A0A6Q8PGE8;P49588	A0A6Q8PF33;A0A6Q8PGE8;P49588	Homo sapiens	A0A6Q8PF33_HUMAN;A0A6Q8PGE8_HUMAN;SYAC_HUMAN	Isoform of P49588, Alanine--tRNA ligase;Isoform of P49588, Alanine--tRNA ligase;Alanine--tRNA ligase, cytoplasmic	AARS1
9946.92	8240.09	7291.78	9229.6	11417.1	7499.96	8241.64	8073.61	8119.89	9528.82	8298.03	8328.79	10028.7	8965.5	8666.49	8649.14	7216.77	8311.28	9	9	9	10	10	9	10	9	6	10	9	10	10	5	9	4	9	9	Q5JTZ9	Q5JTZ9	Homo sapiens	SYAM_HUMAN	Alanine--tRNA ligase, mitochondrial	AARS2
3371.67	3683.29	3994.63	3146.49	3563.77	4063.81	3394.16	3580.23	3103.11	3662.22	2680.11	3756.85	3327.74	4559.74	3340.53	4017.9	3153.71	3791.76	7	6	7	7	7	7	7	6	7	7	7	7	7	6	7	3	7	7	Q9NRN7	Q9NRN7	Homo sapiens	ADPPT_HUMAN	L-aminoadipate-semialdehyde dehydrogenase-phosphopantetheinyl transferase	AASDHPPT
2544.5	2112.82	4121.43	2494.93	2252.79	2656.05	2318.53	2118.09	2541.96	1682.79	2000.63	3689.35	2430.89	NaN	2584.78	NaN	2505.18	NaN	1	1	1	1	1	1	1	1	1	1	1	1	1	0	1	0	1	0	A0A7P0TAY5;Q9UDR5	A0A7P0TAY5;Q9UDR5	Homo sapiens	A0A7P0TAY5_HUMAN;AASS_HUMAN	Isoform of Q9UDR5, Aminoadipate-semialdehyde synthase;Alpha-aminoadipic semialdehyde synthase, mitochondrial	AASS
NaN	NaN	1901.75	1212.97	2220.47	2502.34	2108.75	NaN	429.041	1023.28	1533.61	2106.25	1394.39	NaN	1870.15	541.146	NaN	3054.19	0	0	1	1	1	1	1	0	1	1	1	1	1	0	1	1	0	1	A0A7P0T868;A0A7P0TAR0;A0A7P0TBG4;A0A7P0TBI0;A0A7P0Z434;A0A7P0Z4N2;A0A7P0Z4P2;Q9NY61	A0A7P0T868;A0A7P0TAR0;A0A7P0TBG4;A0A7P0TBI0;A0A7P0Z434;A0A7P0Z4N2;A0A7P0Z4P2;Q9NY61	Homo sapiens	A0A7P0T868_HUMAN;A0A7P0TAR0_HUMAN;A0A7P0TBG4_HUMAN;A0A7P0TBI0_HUMAN;A0A7P0Z434_HUMAN;A0A7P0Z4N2_HUMAN;A0A7P0Z4P2_HUMAN;AATF_HUMAN	Isoform of Q9NY61, Apoptosis antagonizing transcription factor;Isoform of Q9NY61, Apoptosis antagonizing transcription factor;Isoform of Q9NY61, Apoptosis antagonizing transcription factor;Isoform of Q9NY61, Apoptosis antagonizing transcription factor;Isoform of Q9NY61, Apoptosis antagonizing transcription factor;Isoform of Q9NY61, Apoptosis antagonizing transcription factor;Isoform of Q9NY61, Ap…	AATF
4512.23	3455.54	2550.84	2995.8	2186.37	1683.35	3486.01	3046.08	NaN	2553.57	3302.62	2915.65	2271.39	NaN	2294.37	7143.77	6244.7	3086.28	3	5	4	5	5	4	5	3	0	3	5	3	3	0	5	1	5	3	H3BNQ7;H3BRN4;P80404	H3BNQ7;H3BRN4;P80404	Homo sapiens	H3BNQ7_HUMAN;H3BRN4_HUMAN;GABT_HUMAN	Isoform of P80404, 4-aminobutyrate aminotransferase, mitochondrial;Isoform of P80404, 4-aminobutyrate aminotransferase, mitochondrial;4-aminobutyrate aminotransferase, mitochondrial	ABAT
1532.23	1286.85	1742.84	1775.28	2327.9	668.421	306.396	1756.54	1260.07	2117.44	931.93	1667.23	2128.09	NaN	1367.32	1275.42	1147.26	959.189	4	4	3	4	4	4	2	3	2	4	2	4	4	0	4	1	4	1	Q9NRK6	Q9NRK6	Homo sapiens	ABCBA_HUMAN	ATP-binding cassette sub-family B member 10, mitochondrial	ABCB10
5998.61	2540.66	2821.2	3076.76	4788.6	3305.71	6015.13	4013.41	4032.47	4182.91	NaN	4032.62	5440.4	NaN	5734.07	NaN	2738.66	2402.94	4	3	3	4	4	4	4	3	4	3	0	4	4	0	3	0	2	2	A0A087WW65;A0A590UJS8;A0A5F9ZA98;O75027;O75027-2;O75027-3	A0A087WW65;A0A590UJS8;A0A5F9ZA98;O75027;O75027-2;O75027-3	Homo sapiens	A0A087WW65_HUMAN;A0A590UJS8_HUMAN;A0A5F9ZA98_HUMAN;ABCB7_HUMAN;ABCB7_HUMAN;ABCB7_HUMAN	Isoform of O75027, ATP binding cassette subfamily B member 7;Isoform of O75027, ATP binding cassette subfamily B member 7;Isoform of O75027, ATP binding cassette subfamily B member 7;Iron-sulfur clusters transporter ABCB7, mitochondrial;Isoform of O75027, Isoform 2 of Iron-sulfur clusters transporter ABCB7, mitochondrial;Isoform of O75027, Isoform 3 of Iron-sulfur clusters transporter ABCB7, mito…	ABCB7
3486.87	NaN	2804.59	3129.18	2261.88	NaN	NaN	1133.85	NaN	2225.16	NaN	NaN	2277.35	NaN	NaN	NaN	1268.5	NaN	2	0	2	2	2	0	0	1	0	2	0	0	2	0	0	0	1	0	Q9NUT2;Q9NUT2-2;Q9NUT2-4;Q9NUT2-5	Q9NUT2;Q9NUT2-2;Q9NUT2-4;Q9NUT2-5	Homo sapiens	MITOS_HUMAN	Mitochondrial potassium channel ATP-binding subunit;Isoform of Q9NUT2, Isoform 2 of Mitochondrial potassium channel ATP-binding subunit;Isoform of Q9NUT2, Isoform 4 of Mitochondrial potassium channel ATP-binding subunit;Isoform of Q9NUT2, Isoform 5 of Mitochondrial potassium channel ATP-binding subunit	ABCB8
9929.28	8859.25	8472.11	7099.32	8719.5	7804.86	9631.7	6600.45	7987.14	7116.42	8003.14	7001.41	7117.76	6858.55	7441.36	8377.29	12869	5781.68	16	15	19	19	15	17	17	16	16	17	13	14	17	8	16	9	17	14	I3L4X2;P33527;P33527-2;P33527-4;P33527-6;P33527-9	I3L4X2;P33527;P33527-2;P33527-4;P33527-6;P33527-9	Homo sapiens	I3L4X2_HUMAN;MRP1_HUMAN;MRP1_HUMAN;MRP1_HUMAN;MRP1_HUMAN;MRP1_HUMAN	Isoform of P33527, ABC-type glutathione-S-conjugate transporter (Fragment);Multidrug resistance-associated protein 1;Isoform of P33527, Isoform 2 of Multidrug resistance-associated protein 1;Isoform of P33527, Isoform 4 of Multidrug resistance-associated protein 1;Isoform of P33527, Isoform 6 of Multidrug resistance-associated protein 1;Isoform of P33527, Isoform 9 of Multidrug resistance-associa…	ABCC1
1614.91	1101.69	995.527	1403.36	1269.94	2262.41	2359.95	2339.91	2196.94	1890.29	647.273	1697.63	NaN	2427.76	1124.36	2357.3	2940.28	1524.24	1	1	2	1	1	3	1	3	1	2	1	2	0	1	1	1	3	3	O15439;O15439-2	O15439;O15439-2	Homo sapiens	MRP4_HUMAN	ATP-binding cassette sub-family C member 4;Isoform of O15439, Isoform 2 of ATP-binding cassette sub-family C member 4	ABCC4
28657.6	33649.9	18794.7	27835.8	21443.1	20561.5	31737.2	18557.4	23870.9	20405.4	16306	22118.4	33288	28718	33093.5	23443.2	31809.1	17509.9	2	2	2	2	2	2	2	2	2	2	2	2	2	1	2	2	2	1	A0A0G2JMG3;A0A0J9YVW5;A0A8C8Q0G8;O95255;O95255-3	A0A0G2JMG3;A0A0J9YVW5;A0A8C8Q0G8;O95255;O95255-3	Homo sapiens	A0A0G2JMG3_HUMAN;A0A0J9YVW5_HUMAN;A0A8C8Q0G8_HUMAN;MRP6_HUMAN;MRP6_HUMAN	Isoform of O95255, ABC-type glutathione-S-conjugate transporter;Isoform of O95255, ATP-binding cassette sub-family C member 6;Isoform of O95255, ATP binding cassette subfamily C member 6;ATP-binding cassette sub-family C member 6;Isoform of O95255, Isoform 3 of ATP-binding cassette sub-family C member 6	ABCC6
6987.07	12284.3	3715.58	5028.82	5275.93	4692.65	6251.79	2755.88	3640.77	3056.62	3958.71	3031.61	3240.81	NaN	4881.09	6302.19	6361.95	3614.35	4	3	4	4	4	4	2	2	3	4	2	3	4	0	3	2	4	4	P33897	P33897	Homo sapiens	ABCD1_HUMAN	ATP-binding cassette sub-family D member 1	ABCD1
7165.98	9874.42	5111.77	4666.37	9485.79	10610.8	10160.7	9925.5	9348.93	4725.27	10971.8	8473.04	5144.04	11247.8	10855.3	13837.3	9201.44	8816.81	10	12	12	10	12	12	12	12	12	10	12	11	9	7	12	12	11	11	A0A3B3ITW3;P28288	A0A3B3ITW3;P28288	Homo sapiens	A0A3B3ITW3_HUMAN;ABCD3_HUMAN	Isoform of P28288, ATP binding cassette subfamily D member 3;ATP-binding cassette sub-family D member 3	ABCD3
25069.7	20753.6	24843.4	24636.8	23927.9	20790.5	17648.4	22021.9	23591.8	21110.4	22171	22383.4	21829.8	31549.2	23124.5	16776.9	16305	26176	17	14	19	18	15	18	13	17	16	20	15	17	18	12	18	10	15	17	P61221	P61221	Homo sapiens	ABCE1_HUMAN	ATP-binding cassette sub-family E member 1	ABCE1
16381.7	15478.3	19285.7	17160.6	16158.5	17661	16249.3	13207.9	16198.2	15182.3	12474.8	13807.9	14161.6	13846.1	14282.3	15193.5	10987.9	13493.8	22	23	23	23	23	22	21	23	22	21	17	21	23	12	19	15	20	22	Q5STZ8;Q8NE71	Q5STZ8;Q8NE71	Homo sapiens	Q5STZ8_HUMAN;ABCF1_HUMAN	Isoform of Q8NE71, ATP binding cassette subfamily F member 1;ATP-binding cassette sub-family F member 1	ABCF1
7657.6	8037.25	9093.1	8964.2	9620.53	9722.52	10941.8	7642.76	10184.3	10868.4	8411.97	10364	7604.44	11223.1	9611.51	7301.59	7174.4	11142.8	17	19	20	21	20	18	17	20	18	22	15	18	21	12	20	9	15	19	Q9UG63;Q9UG63-2	Q9UG63;Q9UG63-2	Homo sapiens	ABCF2_HUMAN	ATP-binding cassette sub-family F member 2;Isoform of Q9UG63, Isoform 2 of ATP-binding cassette sub-family F member 2	ABCF2
11281.3	12408.3	10529.4	10111.1	10231.3	10379.8	10539.2	7894.86	9860.49	8675.76	10502.6	10307.7	10668.2	10576.2	9410.02	9444.28	8714.34	10518.3	15	15	15	15	14	15	12	14	13	15	12	15	15	8	15	12	13	14	Q9NUQ8;Q9NUQ8-2	Q9NUQ8;Q9NUQ8-2	Homo sapiens	ABCF3_HUMAN	ATP-binding cassette sub-family F member 3;Isoform of Q9NUQ8, Isoform 2 of ATP-binding cassette sub-family F member 3	ABCF3
NaN	NaN	3036.13	NaN	NaN	2598.2	NaN	NaN	NaN	NaN	NaN	NaN	NaN	NaN	2657.01	NaN	NaN	NaN	0	0	1	0	0	1	0	0	0	0	0	0	0	0	1	0	0	0	F8S0F2;Q9UNQ0;Q9UNQ0-2	F8S0F2;Q9UNQ0;Q9UNQ0-2	Homo sapiens	F8S0F2_HUMAN;ABCG2_HUMAN;ABCG2_HUMAN	Isoform of Q9UNQ0, ATP binding cassette subfamily G member 2 (Junior blood group) (Fragment);Broad substrate specificity ATP-binding cassette transporter ABCG2;Isoform of Q9UNQ0, Isoform 2 of Broad substrate specificity ATP-binding cassette transporter ABCG2	ABCG2
15334.2	17846.8	17377.5	15801.9	16823.6	14601.4	18582.4	15110.4	15724.5	15390.9	14085.3	16096.4	20086.7	24231.2	13609.6	15596.5	17987.7	12885.7	8	7	8	8	8	8	8	8	8	8	6	8	8	5	7	7	8	6	Q9NUJ1	Q9NUJ1	Homo sapiens	ABHDA_HUMAN	Palmitoyl-protein thioesterase ABHD10, mitochondrial	ABHD10
5344.54	4433.58	5424.37	6744.31	6245.83	3412.09	6175.41	5204.22	6736.21	4260.9	4309.03	5577.81	5856.31	5997.1	6347.3	4683.17	4814.21	3252.11	9	8	9	10	9	9	7	9	7	8	8	9	9	3	9	3	9	6	Q8NFV4;Q8NFV4-4	Q8NFV4;Q8NFV4-4	Homo sapiens	ABHDB_HUMAN	Protein ABHD11;Isoform of Q8NFV4, Isoform 4 of Protein ABHD11	ABHD11
7488.34	11023.2	10187.8	8789.22	10607.3	9343.26	11819.3	9921.99	9929.04	12693.6	11164	10071.9	9849.49	3526.95	12020	8458.8	11433.4	6589.27	8	8	10	10	9	8	9	8	10	12	9	9	10	4	10	7	10	8	Q8N2K0;Q8N2K0-2	Q8N2K0;Q8N2K0-2	Homo sapiens	ABD12_HUMAN	Lysophosphatidylserine lipase ABHD12;Isoform of Q8N2K0, Isoform 2 of Lysophosphatidylserine lipase ABHD12	ABHD12
21999.7	25042.3	19102.1	20775	18019.6	20561.7	15581.1	18629.9	15094.8	9493.15	25219.8	21186.9	16716.4	17264.9	21156.6	21618.3	31841.8	16964.2	11	10	13	13	12	11	11	12	12	12	13	13	12	9	13	11	13	12	Q96IU4	Q96IU4	Homo sapiens	ABHEB_HUMAN	Putative protein-lysine deacylase ABHD14B	ABHD14B
7043.05	7067.73	6844.83	5513.34	6975.64	5295.65	5976.68	5435.39	5624.43	7001.43	4083.9	6346.4	6038.88	3638.63	6372.88	3140.6	10701.8	4193.65	7	5	7	7	7	7	7	6	6	7	3	6	7	2	7	1	5	5	A0A0G2JJD3;O95870	A0A0G2JJD3;O95870	Homo sapiens	A0A0G2JJD3_HUMAN;ABHGA_HUMAN	Isoform of O95870, HLA-B associated transcript 5, isoform CRA_b;Phosphatidylserine lipase ABHD16A	ABHD16A
557.915	NaN	1551.51	904.38	529.372	NaN	NaN	NaN	NaN	NaN	NaN	NaN	NaN	NaN	NaN	NaN	NaN	NaN	1	0	1	1	1	0	0	0	0	0	0	0	0	0	0	0	0	0	F5H6T0;Q8TB40;Q8TB40-2	F5H6T0;Q8TB40;Q8TB40-2	Homo sapiens	F5H6T0_HUMAN;ABHD4_HUMAN;ABHD4_HUMAN	Isoform of Q8TB40, Abhydrolase domain containing 4, N-acyl phospholipase B (Fragment);(Lyso)-N-acylphosphatidylethanolamine lipase;Isoform of Q8TB40, Isoform 2 of (Lyso)-N-acylphosphatidylethanolamine lipase	ABHD4
2507.43	2070.28	1711.67	729.078	2958.4	8122.64	7726.76	788.091	3751.01	1373.33	4961.72	3364.13	NaN	NaN	1712.59	4941.04	NaN	2212.84	2	2	3	2	3	3	3	1	2	2	3	3	0	0	2	2	0	2	C9J1D1;Q8WTS1	C9J1D1;Q8WTS1	Homo sapiens	C9J1D1_HUMAN;ABHD5_HUMAN	Isoform of Q8WTS1, Abhydrolase domain containing 5, lysophosphatidic acid acyltransferase;1-acylglycerol-3-phosphate O-acyltransferase ABHD5	ABHD5
7694.46	6761.93	6895.19	NaN	NaN	8073.93	6660.75	NaN	6545.92	NaN	5632.75	7537.34	5354.72	NaN	NaN	8091.29	NaN	NaN	1	1	1	0	0	1	1	0	1	0	1	1	1	0	0	1	0	0	Q9BV23	Q9BV23	Homo sapiens	ABHD6_HUMAN	Monoacylglycerol lipase ABHD6	ABHD6
15603.6	14362.5	15322.4	17239	13597.9	13049.2	11926.8	12298.9	13099.5	16697.5	15096.1	14021.3	16251.3	12455.5	14652.6	14205.3	15387.5	13301.2	7	7	7	7	6	7	7	6	7	7	7	7	7	6	7	5	7	7	B6VEX4;Q8IZP0;Q8IZP0-12;Q8IZP0-3;Q8IZP0-4;Q8IZP0-6;Q8IZP0-7;Q8IZP0-8;Q8IZP0-9	B6VEX4;Q8IZP0;Q8IZP0-12;Q8IZP0-3;Q8IZP0-4;Q8IZP0-6;Q8IZP0-7;Q8IZP0-8;Q8IZP0-9	Homo sapiens	B6VEX4_HUMAN;ABI1_HUMAN;ABI1_HUMAN;ABI1_HUMAN;ABI1_HUMAN;ABI1_HUMAN;ABI1_HUMAN;ABI1_HUMAN;ABI1_HUMAN	Isoform of Q8IZP0, Abl interactor 1;Abl interactor 1;Isoform of Q8IZP0, Isoform 12 of Abl interactor 1;Isoform of Q8IZP0, Isoform 3 of Abl interactor 1;Isoform of Q8IZP0, Isoform 4 of Abl interactor 1;Isoform of Q8IZP0, Isoform 6 of Abl interactor 1;Isoform of Q8IZP0, Isoform 7 of Abl interactor 1;Isoform of Q8IZP0, Isoform 8 of Abl interactor 1;Isoform of Q8IZP0, Isoform 9 of Abl interactor 1	ABI1
3283.15	905.208	3734.76	3271.32	3827.45	2997.27	1395.14	4660.23	2251.67	4476.35	4403.46	3536.61	4980.44	NaN	4342.03	1740.57	3834.78	2411.51	2	2	2	2	2	2	1	2	1	2	1	2	2	0	2	1	2	2	A0A0C4DG21;A0A7D9NKC8;E7EP65;E7EW77;E9PEZ7;F8WAL6;Q9NYB9;Q9NYB9-2;Q9NYB9-4	A0A0C4DG21;A0A7D9NKC8;E7EP65;E7EW77;E9PEZ7;F8WAL6;Q9NYB9;Q9NYB9-2;Q9NYB9-4	Homo sapiens	A0A0C4DG21_HUMAN;A0A7D9NKC8_HUMAN;E7EP65_HUMAN;E7EW77_HUMAN;E9PEZ7_HUMAN;F8WAL6_HUMAN;ABI2_HUMAN;ABI2_HUMAN;ABI2_HUMAN	Isoform of Q9NYB9, Abl interactor 2;Isoform of Q9NYB9, Abl interactor 2;Isoform of Q9NYB9, Abl interactor 2 (Fragment);Isoform of Q9NYB9, Abl interactor 2;Isoform of Q9NYB9, Abl interactor 2;Isoform of Q9NYB9, Abl interactor 2;Abl interactor 2;Isoform of Q9NYB9, Isoform 2 of Abl interactor 2;Isoform of Q9NYB9, Isoform 4 of Abl interactor 2	ABI2
NaN	NaN	4619.34	NaN	NaN	NaN	2172.55	NaN	NaN	NaN	886.775	825.685	943.919	NaN	NaN	5545.78	2123.46	NaN	0	0	3	0	0	0	3	0	0	0	2	1	2	0	0	1	2	0	D3YTG3;H7C556;Q7Z7G0	D3YTG3;H7C556;Q7Z7G0	Homo sapiens	D3YTG3_HUMAN;H7C556_HUMAN;TARSH_HUMAN	Isoform of Q7Z7G0, ABI family member 3 binding protein;Isoform of Q7Z7G0, ABI family member 3 binding protein;Target of Nesh-SH3	ABI3BP
167.391	1058.03	827.509	1096.27	829.554	1151.33	820.242	741.171	395.706	1174.05	676.539	1593.77	578.477	NaN	1026.45	879.435	460.772	1262.45	1	1	1	1	1	1	1	1	1	1	1	1	1	0	1	1	1	1	P42684;P42684-10;P42684-2;P42684-3;P42684-4;P42684-5;P42684-6;P42684-7	P42684;P42684-10;P42684-2;P42684-3;P42684-4;P42684-5;P42684-6;P42684-7	Homo sapiens	ABL2_HUMAN	Tyrosine-protein kinase ABL2;Isoform of P42684, Isoform 10 of Tyrosine-protein kinase ABL2;Isoform of P42684, Isoform 2 of Tyrosine-protein kinase ABL2;Isoform of P42684, Isoform 3 of Tyrosine-protein kinase ABL2;Isoform of P42684, Isoform 4 of Tyrosine-protein kinase ABL2;Isoform of P42684, Isoform 5 of Tyrosine-protein kinase ABL2;Isoform of P42684, Isoform 6 of Tyrosine-protein kinase ABL2;Iso…	ABL2
2706.03	1161.03	824.369	454.6	NaN	2892.68	4245.9	4408.6	2819.32	2399.42	4731.5	4579.17	1944.77	NaN	1694.44	5419.32	3250.51	2145.39	2	2	2	1	0	3	1	3	1	3	2	2	1	0	2	2	3	1	A0A0C4DGA7;O94929;O94929-2;O94929-3	A0A0C4DGA7;O94929;O94929-2;O94929-3	Homo sapiens	A0A0C4DGA7_HUMAN;ABLM3_HUMAN;ABLM3_HUMAN;ABLM3_HUMAN	Isoform of O94929, Actin binding LIM protein family member 3;Actin-binding LIM protein 3;Isoform of O94929, Isoform 2 of Actin-binding LIM protein 3;Isoform of O94929, Isoform 3 of Actin-binding LIM protein 3	ABLIM3
4391.27	5116.26	4842.51	6552.15	3778.99	3596.07	4855.85	3877.98	4131.32	6027.05	5130.97	4436.47	8365.68	25842	5702.99	3187.39	5374.63	4532.47	8	10	12	11	9	10	9	9	9	12	4	11	11	2	11	3	10	9	A0A0G2JQ41;A0A1C7CYZ0;I3L4Y1;Q12979;Q12979-2;Q12979-4	A0A0G2JQ41;A0A1C7CYZ0;I3L4Y1;Q12979;Q12979-2;Q12979-4	Homo sapiens	A0A0G2JQ41_HUMAN;A0A1C7CYZ0_HUMAN;I3L4Y1_HUMAN;ABR_HUMAN;ABR_HUMAN;ABR_HUMAN	Isoform of Q12979, Active breakpoint cluster region-related protein (Fragment);Isoform of Q12979, Active breakpoint cluster region-related protein;Isoform of Q12979, Active breakpoint cluster region-related protein;Active breakpoint cluster region-related protein;Isoform of Q12979, Isoform Short of Active breakpoint cluster region-related protein;Isoform of Q12979, Isoform 4 of Active breakpoint …	ABR
45827.2	47216.2	64110.2	96455.7	47698.5	74373.7	42396.8	98352.4	66309.2	73604.4	5366.91	32012.7	32062.9	64062.5	38034.6	66799.1	54437.5	52709.6	3	3	4	4	3	4	3	4	4	4	2	3	2	1	3	2	3	3	Q9P1F3	Q9P1F3	Homo sapiens	ABRAL_HUMAN	Costars family protein ABRACL	ABRACL
6590.72	6615.39	7090.28	6886.23	5790.77	5751.05	5028.88	5329.77	6251.64	5905.1	6217.31	6134.97	5980.94	5647.88	5213.46	6443.74	6693.35	7052.16	7	7	8	7	8	8	7	7	5	8	7	7	8	3	8	8	8	7	Q15018	Q15018	Homo sapiens	ABRX2_HUMAN	BRISC complex subunit Abraxas 2	ABRAXAS2
22721.5	21594.5	18378.6	16315.5	19403.5	18517.6	27513.3	14474.9	21648.9	15462.3	22384.8	20296.1	16701.8	15495	18488.2	32207.4	36340.3	18274.7	7	6	7	8	6	8	7	7	7	8	6	6	7	6	6	6	7	6	P09110	P09110	Homo sapiens	THIK_HUMAN	3-ketoacyl-CoA thiolase, peroxisomal	ACAA1
33219.2	33792.3	27491.5	30056.5	28849.7	16141.6	23962.3	23313.9	21344.4	31236.9	24902.6	22618.1	37427.3	20635.9	27425.9	26591	17668.6	20913.3	23	21	23	23	22	22	19	22	21	23	22	21	22	16	21	18	23	22	P42765	P42765	Homo sapiens	THIM_HUMAN	3-ketoacyl-CoA thiolase, mitochondrial	ACAA2
3083.26	4368.69	3684.39	3736.11	3585.33	3498.91	2898.77	4650.11	3539.22	4730.42	2787.59	3556.23	3912.32	4623.54	4664.64	2436.55	5115.1	2800.1	16	14	18	18	16	14	12	19	16	19	13	18	19	3	19	6	17	13	Q13085;Q13085-2;Q13085-3;Q13085-4	Q13085;Q13085-2;Q13085-3;Q13085-4	Homo sapiens	ACACA_HUMAN	Acetyl-CoA carboxylase 1;Isoform of Q13085, Isoform 2 of Acetyl-CoA carboxylase 1;Isoform of Q13085, Isoform 3 of Acetyl-CoA carboxylase 1;Isoform of Q13085, Isoform 4 of Acetyl-CoA carboxylase 1	ACACA
NaN	NaN	2655.89	2734.17	NaN	2884.84	3672.92	1023.21	NaN	2197.44	3801.56	3374.6	1008.92	NaN	2907.41	NaN	2397.43	2729.11	0	0	1	1	0	1	1	1	0	1	1	1	1	0	1	0	1	1	Q709F0;Q709F0-3	Q709F0;Q709F0-3	Homo sapiens	ACD11_HUMAN	Acyl-CoA dehydrogenase family member 11;Isoform of Q709F0, Isoform 3 of Acyl-CoA dehydrogenase family member 11	ACAD11
4092.35	2127.6	3742.47	3930.12	3383.96	1756.45	2963.74	2163.03	1776.48	3292.16	2991.44	2966.35	4127.67	NaN	3559.92	3845.93	4424.22	1406.5	1	1	1	1	1	1	1	1	1	1	1	1	1	0	1	1	1	1	E9PLS3;Q9UKU7	E9PLS3;Q9UKU7	Homo sapiens	E9PLS3_HUMAN;ACAD8_HUMAN	Isoform of Q9UKU7, Acyl-CoA dehydrogenase family member 8;Isobutyryl-CoA dehydrogenase, mitochondrial	ACAD8
5321.8	7317.72	7569.31	9707.44	8590.32	7042.5	11342.4	7972.62	8545.55	8835.86	7711.17	6271.12	8446.4	7312.29	8321.82	8119.03	9130.03	5203.23	10	14	16	16	16	13	14	15	13	16	11	15	16	12	15	10	14	12	Q9H845	Q9H845	Homo sapiens	ACAD9_HUMAN	Complex I assembly factor ACAD9, mitochondrial	ACAD9
14245.2	13844.2	17088	17493.4	21570.3	13214.2	17192.9	15705	18286.7	14397.9	16370.8	21527.4	17495.8	18775.5	20111.1	21119.7	17462.6	16500	10	9	11	12	11	9	10	10	10	11	7	12	11	7	11	8	11	10	F6YB23;P11310;P11310-2;Q5T4U5	F6YB23;P11310;P11310-2;Q5T4U5	Homo sapiens	F6YB23_HUMAN;ACADM_HUMAN;ACADM_HUMAN;Q5T4U5_HUMAN	Isoform of P11310, Acyl-CoA dehydrogenase medium chain;Medium-chain specific acyl-CoA dehydrogenase, mitochondrial;Isoform of P11310, Isoform 2 of Medium-chain specific acyl-CoA dehydrogenase, mitochondrial;Isoform of P11310, Medium-chain specific acyl-CoA dehydrogenase, mitochondrial	ACADM
10260.6	4981.41	5852.23	8449.25	6652.22	2550.52	4428.91	5763.62	2595.95	8084.1	7686.24	4372.33	10735	4635.71	4721.18	5009.01	6829.59	5568.73	2	2	2	2	2	2	2	2	1	2	2	2	2	1	2	2	2	2	E9PE82;P16219	E9PE82;P16219	Homo sapiens	E9PE82_HUMAN;ACADS_HUMAN	Isoform of P16219, Acyl-CoA dehydrogenase short chain;Short-chain specific acyl-CoA dehydrogenase, mitochondrial	ACADS
3121.41	3329.8	3182.25	3888.54	3550.45	3084.33	4104.34	2510.1	2313.59	3858.49	4564.66	2756.57	4674.17	3737.94	4096.57	4580.14	4904.5	2195.11	3	3	4	4	3	3	3	3	4	4	3	3	3	2	4	2	3	3	P45954-2	P45954-2	Homo sapiens	ACDSB_HUMAN	Isoform of P45954, Isoform 2 of Short/branched chain specific acyl-CoA dehydrogenase, mitochondrial	ACADSB
84136.6	95381.8	58652.6	63584.7	58237.9	61972.2	79527	78303.5	58967.2	71589.9	69412	75504.7	130515	62326.1	96308.8	83703.9	85157.2	40565.6	34	34	36	36	32	32	33	35	31	35	28	34	37	27	33	27	32	32	P49748;P49748-3	P49748;P49748-3	Homo sapiens	ACADV_HUMAN	Very long-chain specific acyl-CoA dehydrogenase, mitochondrial;Isoform of P49748, Isoform 3 of Very long-chain specific acyl-CoA dehydrogenase, mitochondrial	ACADVL
7663.47	5732.24	6747.4	6805.88	6545.02	6164.41	5543.43	5152.87	4227.76	5384.65	6817.01	6904.06	5619.53	6384.11	5567.67	5079.61	7771.43	6101.21	6	6	6	7	6	6	5	5	7	6	4	5	6	4	7	4	6	6	H7C3K3;Q15057	H7C3K3;Q15057	Homo sapiens	H7C3K3_HUMAN;ACAP2_HUMAN	Isoform of Q15057, Arf-GAP with coiled-coil, ANK repeat and PH domain-containing protein;Arf-GAP with coiled-coil, ANK repeat and PH domain-containing protein 2	ACAP2
40092.2	32711.3	40042.4	40187.2	39000.6	37130	49150	45827	34689.6	36615.9	39473.7	40025.5	45833.1	28574.4	39446.9	56115	53747	23673.7	20	19	23	23	23	23	23	21	23	22	19	20	22	15	22	20	19	18	P24752	P24752	Homo sapiens	THIL_HUMAN	Acetyl-CoA acetyltransferase, mitochondrial	ACAT1
22392.9	27176.9	21129.7	27180.1	28532.5	20895	15955.3	68574.6	28523.8	27755.4	30137.7	28575.8	40420.6	43219.5	35753	35610.6	32763	21132.6	9	8	10	10	8	8	6	10	9	10	8	10	9	6	10	7	9	9	Q9BWD1	Q9BWD1	Homo sapiens	THIC_HUMAN	Acetyl-CoA acetyltransferase, cytosolic	ACAT2
20255.9	23031.5	22701.5	22107	25008.6	19995.2	24932.9	20498.9	20719	21210.9	20565.3	23907.3	20772.2	22223.9	21933.3	23167.2	18570.4	21180.1	10	10	11	12	12	11	10	10	10	11	8	10	11	9	11	8	11	11	Q9H3P7	Q9H3P7	Homo sapiens	GCP60_HUMAN	Golgi resident protein GCP60	ACBD3
5817.02	16572.7	10895.4	12191.5	18973.3	15446.4	19667.6	15920.7	15893.1	9160.88	17948.9	16731	15082.6	NaN	17340.8	16382.6	17986.5	15399.6	1	1	2	2	2	2	2	2	2	2	1	2	2	0	2	2	2	2	A0A7I2V2M2;A0A7I2V2Y9;A0A7I2V347;A0A7I2V420;A0A7I2V462;A0A7I2V560;A0A7I2V5E1;A0A7I2V5L4;A0A7I2V5U2;A0A7I2YQD7;A0A7I2YQE9;A0A7I2YQJ9;B7Z2R7;Q5T8D3;Q5T8D3-2;Q5T8D3-3;Q5T8D3-4;Q5T8E0;X6RDD7	A0A7I2V2M2;A0A7I2V2Y9;A0A7I2V347;A0A7I2V420;A0A7I2V462;A0A7I2V560;A0A7I2V5E1;A0A7I2V5L4;A0A7I2V5U2;A0A7I2YQD7;A0A7I2YQE9;A0A7I2YQJ9;B7Z2R7;Q5T8D3;Q5T8D3-2;Q5T8D3-3;Q5T8D3-4;Q5T8E0;X6RDD7	Homo sapiens	A0A7I2V2M2_HUMAN;A0A7I2V2Y9_HUMAN;A0A7I2V347_HUMAN;A0A7I2V420_HUMAN;A0A7I2V462_HUMAN;A0A7I2V560_HUMAN;A0A7I2V5E1_HUMAN;A0A7I2V5L4_HUMAN;A0A7I2V5U2_HUMAN;A0A7I2YQD7_HUMAN;A0A7I2YQE9_HUMAN;A0A7I2YQJ9_HUMAN;B7Z2R7_HUMAN;ACBD5_HUMAN;ACBD5_HUMAN;ACBD5_HUMAN;ACBD5_HUMAN;Q5T8E0_HUMAN;X6RDD7_HUMAN	Isoform of Q5T8D3, Acyl-CoA-binding domain-containing protein 5;Isoform of Q5T8D3, Acyl-CoA-binding domain-containing protein 5;Isoform of Q5T8D3, Acyl-CoA-binding domain-containing protein 5;Isoform of Q5T8D3, Acyl-CoA-binding domain-containing protein 5;Isoform of Q5T8D3, Acyl-CoA binding domain containing 5;Isoform of Q5T8D3, Acyl-CoA-binding domain-containing protein 5;Isoform of Q5T8D3, Acyl…	ACBD5
5808.61	6052.13	6417.16	4810.56	6314.11	6784.6	6968.54	4330.33	6472.22	4894.81	7177.56	5231.16	2170.18	5663.22	5166.12	5290.34	3279.22	7175.28	3	2	3	3	3	3	2	2	3	3	3	3	2	1	3	2	3	3	A0A2R8Y544;Q9BR61	A0A2R8Y544;Q9BR61	Homo sapiens	A0A2R8Y544_HUMAN;ACBD6_HUMAN	Isoform of Q9BR61, Acyl-CoA-binding domain-containing protein 6;Acyl-CoA-binding domain-containing protein 6	ACBD6
1083.95	NaN	NaN	529.72	NaN	1289.5	1280.93	NaN	NaN	1799.61	NaN	1483.41	1433.39	NaN	NaN	NaN	317.052	NaN	2	0	0	2	0	1	1	0	0	2	0	2	2	0	0	0	2	0	A0A0A0MSN4;F6X3S4;J3KTB8;P12821;P12821-2;P12821-3;P12821-4	A0A0A0MSN4;F6X3S4;J3KTB8;P12821;P12821-2;P12821-3;P12821-4	Homo sapiens	A0A0A0MSN4_HUMAN;F6X3S4_HUMAN;J3KTB8_HUMAN;ACE_HUMAN;ACE_HUMAN;ACE_HUMAN;ACE_HUMAN	Isoform of P12821, Angiotensin-converting enzyme;readthrough, Angiotensin-converting enzyme;Isoform of P12821, Angiotensin-converting enzyme (Fragment);Angiotensin-converting enzyme;Isoform of P12821, Isoform Somatic-2 of Angiotensin-converting enzyme;Isoform of P12821, Isoform Testis-specific of Angiotensin-converting enzyme;Isoform of P12821, Isoform 4 of Angiotensin-converting enzyme	ACE
22255.8	17757.7	20001.8	22993.2	18473.7	19829.2	13703.9	22792.5	18016.7	12251.9	18159.2	17790.9	16684.7	17664.8	13578.9	15725.2	8260.7	19603.4	14	14	17	18	14	16	11	14	15	16	13	18	16	7	14	9	8	16	E7EQT4;Q9UKV3;Q9UKV3-5;S4R3H4	E7EQT4;Q9UKV3;Q9UKV3-5;S4R3H4	Homo sapiens	E7EQT4_HUMAN;ACINU_HUMAN;ACINU_HUMAN;S4R3H4_HUMAN	Isoform of Q9UKV3, Apoptotic chromatin condensation inducer 1;Apoptotic chromatin condensation inducer in the nucleus;Isoform of Q9UKV3, Isoform 4 of Apoptotic chromatin condensation inducer in the nucleus;Isoform of Q9UKV3, Apoptotic chromatin condensation inducer 1	ACIN1
137504	176222	190301	163048	141385	139245	165221	146196	139873	153119	171752	143042	150728	167535	106587	110985	150626	151577	72	71	81	80	73	72	74	75	74	78	70	76	74	59	76	60	74	70	P53396;P53396-2	P53396;P53396-2	Homo sapiens	ACLY_HUMAN	ATP-citrate synthase;Isoform of P53396, Isoform 2 of ATP-citrate synthase	ACLY
13410.3	14380.2	18061.3	14656.7	12647.8	19205.2	15194.2	12597.7	13231.6	14261.5	26421.6	9396.26	10462.8	19871.7	12166.2	28567.7	19356.6	11931.7	22	27	33	32	26	31	26	27	30	32	22	22	28	18	29	22	28	24	P21399	P21399	Homo sapiens	ACOHC_HUMAN	Cytoplasmic aconitate hydratase	ACO1
87304.2	78589.5	89556.9	89418.7	86298.2	73353.8	81197.4	89843.1	66912.9	88084.1	89639.1	89235.2	116683	88275.2	97183.1	99880.4	108318	64180.6	39	37	42	45	41	42	36	43	36	43	32	42	43	27	41	33	42	35	A2A274;Q99798	A2A274;Q99798	Homo sapiens	A2A274_HUMAN;ACON_HUMAN	Isoform of Q99798, Aconitase 2;Aconitate hydratase, mitochondrial	ACO2
24377.6	13029.2	19996.6	29864.4	18449.6	15540.1	16725.3	23495.2	15381.3	17003.6	12819.5	13951.1	19978.9	24951.1	16302	10401.1	24541.4	10341.8	9	8	11	11	9	8	7	10	9	10	6	9	8	6	10	4	9	7	Q86TX2	Q86TX2	Homo sapiens	ACOT1_HUMAN	Acyl-coenzyme A thioesterase 1	ACOT1
2271.24	1500.27	1631.94	2370.24	1183.21	1898.72	2516.99	1603.4	1520.5	1270.78	1484.81	2162.06	740.043	NaN	2254.16	3225.82	2022.19	1964.18	1	1	1	1	1	1	1	1	1	1	1	1	1	0	1	1	1	1	Q8WXI4;Q8WXI4-2	Q8WXI4;Q8WXI4-2	Homo sapiens	ACO11_HUMAN	Acyl-coenzyme A thioesterase 11;Isoform of Q8WXI4, Isoform 2 of Acyl-coenzyme A thioesterase 11	ACOT11
9803.28	10804.7	15571.5	13276	7818.57	11791.8	14821	11875.3	10367.8	9759.26	8901.8	8087.24	8657.39	14434.4	8922.7	11199.2	19580.5	8117.57	4	4	4	4	4	4	4	4	4	4	3	4	4	3	4	4	4	4	Q9NPJ3;Q9NPJ3-2	Q9NPJ3;Q9NPJ3-2	Homo sapiens	ACO13_HUMAN	Acyl-coenzyme A thioesterase 13;Isoform of Q9NPJ3, Isoform 2 of Acyl-coenzyme A thioesterase 13	ACOT13
59716.9	69770.8	62816.6	52944.1	60676.9	60793.2	53867.3	59847.3	61041.3	55412.8	57574.1	39982.9	69625.5	83160.6	66714.9	61297	42151.6	49020.3	14	13	15	13	14	14	14	13	13	15	13	15	15	13	14	14	15	14	O00154;O00154-4;O00154-6;O00154-7	O00154;O00154-4;O00154-6;O00154-7	Homo sapiens	BACH_HUMAN	Cytosolic acyl coenzyme A thioester hydrolase;Isoform of O00154, Isoform 4 of Cytosolic acyl coenzyme A thioester hydrolase;Isoform of O00154, Isoform 6 of Cytosolic acyl coenzyme A thioester hydrolase;Isoform of O00154, Isoform 7 of Cytosolic acyl coenzyme A thioester hydrolase	ACOT7
5717.09	6690.61	4944.62	3521.74	4896.04	7315.3	8290.7	4930.77	6836.36	5195.24	7026	6435.73	6645.41	6501.6	5170.81	11428.5	5492.78	4632.17	1	1	1	1	1	1	1	1	1	1	1	1	1	1	1	1	1	1	E9PJN0;H7C5A7;O14734	E9PJN0;H7C5A7;O14734	Homo sapiens	E9PJN0_HUMAN;H7C5A7_HUMAN;ACOT8_HUMAN	Isoform of O14734, Acyl-CoA thioesterase 8;Isoform of O14734, Acyl-CoA thioesterase 8 (Fragment);Acyl-coenzyme A thioesterase 8	ACOT8
18986.6	17011	20063.3	19253.9	18265.1	16804	26586.1	16676.6	16998.4	18123.5	19520	18463.8	22604.7	19805	19525.8	26858.3	21249	12339.4	15	13	15	16	16	14	12	14	15	16	13	13	16	11	15	10	14	13	Q9Y305	Q9Y305	Homo sapiens	ACOT9_HUMAN	Acyl-coenzyme A thioesterase 9, mitochondrial	ACOT9
20732.4	22133.2	16001.3	18737.6	16327.2	20617.7	24908.7	18369.5	18398.7	16847.9	23082.7	19017.1	16978.3	18645.4	16475.2	16768.2	14514	14983.6	14	15	17	17	16	18	16	17	18	18	15	14	16	10	17	8	14	14	Q15067-2	Q15067-2	Homo sapiens	ACOX1_HUMAN	Isoform of Q15067, Isoform 2 of Peroxisomal acyl-coenzyme A oxidase 1	ACOX1
17422.3	13758.7	13009.1	10940.8	9470.18	9628.1	14796.7	8897.72	4728.27	8143.06	14650.3	9489.71	10049.5	21536.4	10129.6	17311.7	14952.1	6526.83	5	4	6	6	6	5	4	5	2	3	3	5	5	1	6	1	6	4	Q99424	Q99424	Homo sapiens	ACOX2_HUMAN	Peroxisomal acyl-coenzyme A oxidase 2	ACOX2
3436.67	2905.95	3129.59	3768.52	3129.03	3231.46	4119.96	3431	273.845	4095.82	2263.85	2668.13	3392.29	3437.26	3713.96	2909.74	4528.04	2825.67	7	6	10	9	6	8	7	8	5	10	6	8	7	3	10	2	8	7	O15254	O15254	Homo sapiens	ACOX3_HUMAN	Peroxisomal acyl-coenzyme A oxidase 3	ACOX3
61581.3	53343.7	83523.2	72771.4	68101.1	63212.4	61388.4	62401	62633.5	72718.9	67448.5	55301.5	53357.7	57205.9	55815.9	73172.6	50537.1	67686.7	3	3	4	4	3	3	3	3	3	4	3	4	4	3	4	3	4	3	P24666	P24666	Homo sapiens	PPAC_HUMAN	Low molecular weight phosphotyrosine protein phosphatase	ACP1
5334.31	7959.82	7198.12	6468.96	5682.4	5509.41	6803.14	5451.29	5475.93	5778.93	6546.06	5632.05	4912.44	3664.24	5430.33	6671.06	7742.96	5321.59	7	6	8	8	6	6	6	6	7	8	6	7	7	3	8	6	7	6	A0A5F9ZHR7;P11117	A0A5F9ZHR7;P11117	Homo sapiens	A0A5F9ZHR7_HUMAN;PPAL_HUMAN	Isoform of P11117, Acid phosphatase 2, lysosomal;Lysosomal acid phosphatase	ACP2
710.958	276.588	1592.08	1065.17	220.412	334.927	1280.08	1113.15	164.95	653.609	1017.53	337.72	1250.25	NaN	560.19	1360.51	3758.87	191.573	2	2	3	2	2	2	2	2	1	2	1	2	2	0	2	1	2	1	E9PF16;Q96CM8;Q96CM8-2;Q96CM8-3;Q96CM8-4	E9PF16;Q96CM8;Q96CM8-2;Q96CM8-3;Q96CM8-4	Homo sapiens	E9PF16_HUMAN;ACSF2_HUMAN;ACSF2_HUMAN;ACSF2_HUMAN;ACSF2_HUMAN	Isoform of Q96CM8, Acyl-CoA synthetase family member 2;Medium-chain acyl-CoA ligase ACSF2, mitochondrial;Isoform of Q96CM8, Isoform 2 of Medium-chain acyl-CoA ligase ACSF2, mitochondrial;Isoform of Q96CM8, Isoform 3 of Medium-chain acyl-CoA ligase ACSF2, mitochondrial;Isoform of Q96CM8, Isoform 4 of Medium-chain acyl-CoA ligase ACSF2, mitochondrial	ACSF2
6417.71	1439.45	1983.53	7507.86	5190.44	2691.4	6227.81	2073.15	2969.8	2624.48	NaN	3012.72	4659.05	NaN	3992.53	4685.11	3752.18	1539.68	3	2	2	3	3	2	3	2	3	2	0	2	3	0	2	1	2	2	Q4G176	Q4G176	Homo sapiens	ACSF3_HUMAN	Malonate--CoA ligase ACSF3, mitochondrial	ACSF3
10831.4	9178.57	11490.7	12710	11890	10535	12553.5	7380.47	11508.7	10562.3	9151.05	10886	10604.7	10945.7	11265	8467.19	8249.47	6336.01	13	12	14	14	14	12	14	12	12	14	9	14	14	7	14	8	13	9	E7EPM6;P33121;P33121-3	E7EPM6;P33121;P33121-3	Homo sapiens	E7EPM6_HUMAN;ACSL1_HUMAN;ACSL1_HUMAN	Isoform of P33121, Long-chain-fatty-acid--CoA ligase;Long-chain-fatty-acid--CoA ligase 1;Isoform of P33121, Isoform 3 of Long-chain-fatty-acid--CoA ligase 1	ACSL1
17690.4	18649.1	17599.9	16517.7	19931.5	20990.7	22194.4	15692.2	20851.8	19960.1	15145.4	23076.4	22462.6	21906.2	21772	15625.4	20426	16677.5	10	7	10	9	10	9	9	9	9	9	8	11	9	7	11	6	9	9	A0A7P0TA76;A0A7P0TBB1;O95573	A0A7P0TA76;A0A7P0TBB1;O95573	Homo sapiens	A0A7P0TA76_HUMAN;A0A7P0TBB1_HUMAN;ACSL3_HUMAN	Isoform of O95573, Acyl-CoA synthetase long chain family member 3;Isoform of O95573, Acyl-CoA synthetase long chain family member 3;Fatty acid CoA ligase Acsl3	ACSL3
5565.3	5295.27	7930.61	7278.78	8686.96	8684.74	9231.65	7343.62	9774.91	8808.62	8393.39	7695.15	7489.03	8093.63	8298.47	6479.8	4730.86	7433.24	10	12	14	13	13	10	11	12	11	14	7	12	12	5	13	5	7	10	O60488;O60488-2	O60488;O60488-2	Homo sapiens	ACSL4_HUMAN	Long-chain-fatty-acid--CoA ligase 4;Isoform of O60488, Isoform Short of Long-chain-fatty-acid--CoA ligase 4	ACSL4
3180.44	4128.84	4180.09	4590.49	2995.09	3161.67	2716.88	2852.89	2411.14	3387.44	3450.7	1969.12	3527.96	NaN	2799.72	2390.36	4518.46	2972.03	6	7	7	7	7	7	6	7	6	7	5	6	7	0	6	3	7	5	Q9NR19;Q9NR19-2	Q9NR19;Q9NR19-2	Homo sapiens	ACSA_HUMAN	Acetyl-coenzyme A synthetase, cytoplasmic;Isoform of Q9NR19, Isoform 2 of Acetyl-coenzyme A synthetase, cytoplasmic	ACSS2
107752	99782.8	249491	83901.8	56272.8	212331	90984.7	222841	227128	73508.1	186404	150711	44850.6	242791	146236	69970.1	721950	263008	19	20	25	24	22	21	19	22	20	22	20	23	17	20	21	13	22	21	P62736	P62736	Homo sapiens	ACTA_HUMAN	Actin, aortic smooth muscle	ACTA2
20275.8	24478.7	25084.8	29882.2	29706.2	23675.3	14672.2	25517.6	35754.3	21997.4	38132	7035.74	15645.2	16969.8	22480.6	NaN	41094.9	13852.3	2	1	2	2	2	2	2	2	2	2	2	1	2	2	2	0	2	2	A0A2R8Y793	A0A2R8Y793	Homo sapiens	A0A2R8Y793_HUMAN	Isoform of P60709, Actin beta (Fragment)	ACTB
32442.8	57449.8	42359.9	31005.4	47190.5	57487.3	56919.7	48115.1	70429	36590.2	41963.5	44960.8	29120.3	65546	30876.9	71380.1	63023.3	44124	11	9	11	11	9	9	11	10	11	11	8	11	11	7	11	7	11	10	Q562R1	Q562R1	Homo sapiens	ACTBL_HUMAN	Beta-actin-like protein 2	ACTBL2
13184100	15614200	14106700	14269600	14315000	15704600	15047800	16908100	17302100	13888000	19374800	13388500	12500700	16101500	13294100	15989900	23167600	15804000	69	68	78	78	73	72	70	75	75	78	69	75	77	62	74	64	75	75	P63261	P63261	Homo sapiens	ACTG_HUMAN	Actin, cytoplasmic 2	ACTG1
15184.6	16628.6	15911.4	16525	16564.3	16513.3	8824.8	18907.5	16263.8	15938.5	11969	14026.1	15552.8	16596.6	16480.9	11432.9	4602.81	16624.1	7	6	8	8	9	8	6	9	8	9	6	8	9	6	10	4	6	9	O96019	O96019	Homo sapiens	ACL6A_HUMAN	Actin-like protein 6A	ACTL6A
2858.32	5132.31	9343.68	3732.39	1873.91	8342.22	2220.06	2841.87	7426.55	4435.5	606.498	889.337	2816.54	NaN	3296.07	687.186	4680.85	3053.64	1	1	1	1	1	1	1	1	1	1	1	1	1	0	1	1	1	1	A0A804HIN7	A0A804HIN7	Homo sapiens	A0A804HIN7_HUMAN	Isoform of P12814, Actinin alpha 1	ACTN1
278952	300732	266646	320864	235584	374221	297418	391189	322997	297705	349974	346237	416460	389655	334777	286604	510806	328524	73	71	86	87	76	78	73	74	76	85	72	83	84	68	83	67	76	75	A0A8V8TL71	A0A8V8TL71	Homo sapiens	A0A8V8TL71_HUMAN	Isoform of O43707, Actinin alpha 4	ACTN4
6201.96	7598.55	5539.93	6644.86	6002.79	7386.14	5778.52	6379.59	6422.77	7028.25	7140.98	5509.72	7192.76	6413.52	7575.49	6010.43	7823.35	5504.5	6	7	7	8	6	7	7	7	6	7	7	7	7	6	7	7	7	7	Q9NZ32	Q9NZ32	Homo sapiens	ARP10_HUMAN	Actin-related protein 10	ACTR10
54603.2	67964.1	53702.6	61117.8	44455.9	56580	49489.6	55051	53251.9	62509.3	61490	45723.8	63909.8	51194	51379.5	46349.4	59759.5	46142.7	19	20	21	22	18	18	18	19	16	21	19	20	21	14	19	16	20	18	P61163	P61163	Homo sapiens	ACTZ_HUMAN	Alpha-centractin	ACTR1A
10688.6	9467.31	7126.55	9812.64	7254.35	14739.9	9498.19	7994.54	6562.82	6458.11	6047.57	9497	10062.5	5591.53	9896.99	11646.5	11847.7	7748.31	3	2	3	3	2	2	2	2	3	3	3	2	3	1	3	2	2	2	P42025	P42025	Homo sapiens	ACTY_HUMAN	Beta-centractin	ACTR1B
43307.9	48080.4	51348.8	53115.6	41475.3	51897	41066.4	51345	50989	51199.4	54047.9	39537.4	38917.4	50880.6	37358.9	44765.2	62692.4	49124	19	17	22	23	16	19	17	20	21	22	18	21	18	13	21	14	20	19	P61160	P61160	Homo sapiens	ARP2_HUMAN	Actin-related protein 2	ACTR2
123929	108715	139075	147681	111833	115609	101184	127795	114797	144779	126896	102318	104149	115454	98061.3	107422	151089	117420	23	23	31	31	24	28	21	29	31	32	22	22	29	18	28	21	28	26	P61158	P61158	Homo sapiens	ARP3_HUMAN	Actin-related protein 3	ACTR3
510.517	NaN	3184.33	2107.63	604.473	1001.33	1460.21	NaN	NaN	1335.3	NaN	2376.21	1132.94	NaN	2116.84	NaN	1094.36	NaN	1	0	1	1	1	1	1	0	0	1	0	1	1	0	1	0	1	0	A0A804HJQ0;Q04771	A0A804HJQ0;Q04771	Homo sapiens	A0A804HJQ0_HUMAN;ACVR1_HUMAN	Isoform of Q04771, Serine/threonine-protein kinase receptor;Activin receptor type-1	ACVR1
5065.76	5237.23	5398.69	6184.04	4943.69	4284.06	4184.14	4235.69	1135.52	3123.28	7290	4014.29	4587.6	3444.82	3696.96	6282.65	7295.88	3257.27	13	12	14	14	12	11	10	12	4	11	10	10	13	3	11	9	12	11	A0A1B0GU86;A0A1B0GW23;Q03154;Q03154-4	A0A1B0GU86;A0A1B0GW23;Q03154;Q03154-4	Homo sapiens	A0A1B0GU86_HUMAN;A0A1B0GW23_HUMAN;ACY1_HUMAN;ACY1_HUMAN	Isoform of Q03154, N-acyl-aliphatic-L-amino acid amidohydrolase;ABHD14A-ACY1 readthrough, N-acyl-aliphatic-L-amino acid amidohydrolase (Fragment);Aminoacylase-1;Isoform of Q03154, Isoform 4 of Aminoacylase-1	ACY1
3659.84	2642.23	3270.72	3619.03	4430.79	2855.76	2068.67	2644.67	3086.17	3073.66	2283	3080.89	4045.39	3356.78	3332.1	3073.12	3021.89	2411.71	3	2	3	3	3	3	3	3	3	3	2	3	3	1	3	2	2	3	G3V2U7;P07311	G3V2U7;P07311	Homo sapiens	G3V2U7_HUMAN;ACYP1_HUMAN	Isoform of P07311, Acylphosphatase;Acylphosphatase-1	ACYP1
2610.44	3888.11	4887.21	3377.17	2395.35	3708.89	4001.57	2935.88	3354.43	2261.63	4992.64	2765.34	3527.72	1567.88	2338.44	6190.67	9637.44	2922.16	2	2	2	2	2	2	2	2	2	2	2	2	2	2	2	2	2	2	E9PF46;F8WA34;P14621;U3KPX1	E9PF46;F8WA34;P14621;U3KPX1	Homo sapiens	E9PF46_HUMAN;F8WA34_HUMAN;ACYP2_HUMAN;U3KPX1_HUMAN	Isoform of P14621, Acylphosphatase;Isoform of P14621, Acylphosphatase;Acylphosphatase-2;Isoform of P14621, Acylphosphatase (Fragment)	ACYP2
6929.75	5731.2	8093.96	6457.13	4761.54	4526.36	8257.5	4681.81	4219.59	4045.94	7653.59	3767.86	1946.97	3145.03	2307.8	6352.89	6920.83	5141.91	14	12	14	14	12	13	14	10	11	12	12	9	6	2	7	10	13	12	A0A8Q3SI46;A0A8Q3SIA9;A0A8Q3SIC0;A0A8Q3SIC7;A0A8Q3SIG8;A0A8Q3SIH0;A0A8Q3SJ63;A0A8Q3WKY2;A0A8Q3WKZ1;A0A8Q3WKZ4;A0A8Q3WKZ6;A0A8Q3WKZ9;A0A8Q3WL01;A0A8Q3WM09;A0A8Q3WM84;P00813	A0A8Q3SI46;A0A8Q3SIA9;A0A8Q3SIC0;A0A8Q3SIC7;A0A8Q3SIG8;A0A8Q3SIH0;A0A8Q3SJ63;A0A8Q3WKY2;A0A8Q3WKZ1;A0A8Q3WKZ4;A0A8Q3WKZ6;A0A8Q3WKZ9;A0A8Q3WL01;A0A8Q3WM09;A0A8Q3WM84;P00813	Homo sapiens	A0A8Q3SI46_HUMAN;A0A8Q3SIA9_HUMAN;A0A8Q3SIC0_HUMAN;A0A8Q3SIC7_HUMAN;A0A8Q3SIG8_HUMAN;A0A8Q3SIH0_HUMAN;A0A8Q3SJ63_HUMAN;A0A8Q3WKY2_HUMAN;A0A8Q3WKZ1_HUMAN;A0A8Q3WKZ4_HUMAN;A0A8Q3WKZ6_HUMAN;A0A8Q3WKZ9_HUMAN;A0A8Q3WL01_HUMAN;A0A8Q3WM09_HUMAN;A0A8Q3WM84_HUMAN;ADA_HUMAN	Isoform of P00813, Adenosine deaminase;Isoform of P00813, Adenosine deaminase;Isoform of P00813, Adenosine deaminase;Isoform of P00813, Adenosine deaminase;Isoform of P00813, Adenosine deaminase;Isoform of P00813, Adenosine deaminase;Isoform of P00813, Adenosine deaminase;Isoform of P00813, Adenosine deaminase;Isoform of P00813, Adenosine deaminase;Isoform of P00813, Adenosine deaminase;Isoform o…	ADA
10986.4	7527.59	11164.8	10927.1	10620.9	4786.72	8328.32	7039.1	5803.12	9436.14	7210.4	7149.67	8786.6	5778.28	7478.04	4429.79	5155.27	6792.24	11	11	12	13	11	9	9	10	7	13	6	9	13	3	9	3	9	10	O14672	O14672	Homo sapiens	ADA10_HUMAN	Disintegrin and metalloproteinase domain-containing protein 10	ADAM10
8570.19	1839.6	2283.97	3885.69	6648.62	3954.93	4590.85	1680.63	2720.6	3564.47	5914.82	3215.18	4553.97	NaN	4863.87	4729.68	6444.21	NaN	2	2	2	2	2	1	2	1	1	1	1	2	2	0	1	1	2	0	P78536	P78536	Homo sapiens	ADA17_HUMAN	Disintegrin and metalloproteinase domain-containing protein 17	ADAM17
3041.36	2927.82	4636.44	2962.05	3758.25	3071.55	3986.92	4401.29	2866.17	2981.46	1733.76	3189.5	2645.59	NaN	4709.58	4793.4	3307.68	1935.04	3	3	3	3	3	3	3	3	3	3	3	3	3	0	3	2	3	3	A0A7I2V3W3;A0A7I2V4B3;Q13443	A0A7I2V3W3;A0A7I2V4B3;Q13443	Homo sapiens	A0A7I2V3W3_HUMAN;A0A7I2V4B3_HUMAN;ADAM9_HUMAN	Isoform of Q13443, ADAM metallopeptidase domain 9;Isoform of Q13443, ADAM metallopeptidase domain 9;Disintegrin and metalloproteinase domain-containing protein 9	ADAM9
2467.49	1482.24	4364.2	1651.95	2663.91	2075.38	2069.29	NaN	1426.09	1120.99	2084.31	2005.49	2536.41	NaN	2466.84	3337.03	2280.76	2387.64	7	6	8	5	8	8	7	0	7	2	4	8	5	0	7	5	1	5	A0A7I2V5J1;A0A7I2YQL5;E5RI60;Q9UHI8	A0A7I2V5J1;A0A7I2YQL5;E5RI60;Q9UHI8	Homo sapiens	A0A7I2V5J1_HUMAN;A0A7I2YQL5_HUMAN;E5RI60_HUMAN;ATS1_HUMAN	Isoform of Q9UHI8, ADAM metallopeptidase with thrombospondin type 1 motif 1;Isoform of Q9UHI8, ADAM metallopeptidase with thrombospondin type 1 motif 1;Isoform of Q9UHI8, ADAM metallopeptidase with thrombospondin type 1 motif 1;A disintegrin and metalloproteinase with thrombospondin motifs 1	ADAMTS1
2310.06	1696.4	1607.85	1039.4	3314.24	361.137	588.408	2165.05	NaN	1094.62	1276.36	880.742	1073.48	3961.49	1095.47	NaN	775.177	2218.72	1	1	1	1	1	1	1	1	0	1	1	1	1	1	1	0	1	1	O75173	O75173	Homo sapiens	ATS4_HUMAN	A disintegrin and metalloproteinase with thrombospondin motifs 4	ADAMTS4
289.786	NaN	NaN	NaN	133.888	707.703	519.393	NaN	NaN	219.801	672.829	NaN	NaN	NaN	NaN	2189	474.702	NaN	1	0	0	0	1	1	1	0	0	1	1	0	0	0	0	1	1	0	Q9UNA0	Q9UNA0	Homo sapiens	ATS5_HUMAN	A disintegrin and metalloproteinase with thrombospondin motifs 5	ADAMTS5
7050.13	10807.3	4322.83	6787.45	14709.9	3343.57	7237.57	9113.28	6011.78	10788.9	21224	3992.34	8103.41	8128.71	5835.26	2880.53	40001.1	7835.24	9	9	8	12	11	3	6	11	7	14	12	7	11	1	9	2	15	12	A0A7P0T9B9;Q8N6G6	A0A7P0T9B9;Q8N6G6	Homo sapiens	A0A7P0T9B9_HUMAN;ATL1_HUMAN	Isoform of Q8N6G6, ADAMTS like 1 (Fragment);ADAMTS-like protein 1	ADAMTSL1
7001.33	6533.11	6846.17	7173.62	6807.49	6154.7	4004.95	6589.63	6220.36	5813.03	5267.36	5756.54	7928.76	7687.31	7939.64	5145.14	6051.74	6195.37	16	14	15	15	16	15	14	17	14	16	13	15	15	10	16	9	13	12	A0A3B3IRQ9;A0A7P0Z4F9;A0A7P0Z4K3;P55265;P55265-2;P55265-3;P55265-4;P55265-5	A0A3B3IRQ9;A0A7P0Z4F9;A0A7P0Z4K3;P55265;P55265-2;P55265-3;P55265-4;P55265-5	Homo sapiens	A0A3B3IRQ9_HUMAN;A0A7P0Z4F9_HUMAN;A0A7P0Z4K3_HUMAN;DSRAD_HUMAN;DSRAD_HUMAN;DSRAD_HUMAN;DSRAD_HUMAN;DSRAD_HUMAN	Isoform of P55265, Double-stranded RNA-specific adenosine deaminase (Fragment);Isoform of P55265, Adenosine deaminase RNA specific;Isoform of P55265, Adenosine deaminase RNA specific;Double-stranded RNA-specific adenosine deaminase;Isoform of P55265, Isoform 2 of Double-stranded RNA-specific adenosine deaminase;Isoform of P55265, Isoform 3 of Double-stranded RNA-specific adenosine deaminase;Isofo…	ADAR
NaN	NaN	NaN	495.956	NaN	NaN	NaN	NaN	NaN	564.757	NaN	NaN	NaN	NaN	NaN	NaN	NaN	NaN	0	0	0	1	0	0	0	0	0	1	0	0	0	0	0	0	0	0	Q08828	Q08828	Homo sapiens	ADCY1_HUMAN	Adenylate cyclase type 1	ADCY1
803.887	1576.96	NaN	235.592	646.613	NaN	1500.83	NaN	543.551	679.085	1285.33	936.23	124.644	NaN	385.23	NaN	NaN	663.105	1	1	0	1	1	0	1	0	1	1	1	1	1	0	1	0	0	1	P51828	P51828	Homo sapiens	ADCY7_HUMAN	Adenylate cyclase type 7	ADCY7
16423.7	16468.6	19244.6	17209.8	15164.1	8257.66	11860.6	16238.9	12286.5	15301.3	15389.2	14034.1	22020.7	6314.34	15441	6857.12	13065.4	12317.8	19	16	21	22	20	16	17	20	17	20	18	21	21	7	22	11	18	17	E7ENY0;E7EV99;P35611;P35611-2;P35611-3;P35611-6	E7ENY0;E7EV99;P35611;P35611-2;P35611-3;P35611-6	Homo sapiens	E7ENY0_HUMAN;E7EV99_HUMAN;ADDA_HUMAN;ADDA_HUMAN;ADDA_HUMAN;ADDA_HUMAN	Isoform of P35611, Adducin 1;Isoform of P35611, Adducin 1;Alpha-adducin;Isoform of P35611, Isoform 2 of Alpha-adducin;Isoform of P35611, Isoform 3 of Alpha-adducin;Isoform of P35611, Isoform 6 of Alpha-adducin	ADD1
NaN	NaN	NaN	2663.26	NaN	NaN	NaN	NaN	NaN	NaN	NaN	NaN	NaN	NaN	NaN	NaN	NaN	NaN	0	0	0	1	0	0	0	0	0	0	0	0	0	0	0	0	0	0	P35612;P35612-2;P35612-3;P35612-4;P35612-8;P35612-9	P35612;P35612-2;P35612-3;P35612-4;P35612-8;P35612-9	Homo sapiens	ADDB_HUMAN	Beta-adducin;Isoform of P35612, Isoform 2 of Beta-adducin;Isoform of P35612, Isoform 3 of Beta-adducin;Isoform of P35612, Isoform 4 of Beta-adducin;Isoform of P35612, Isoform 8 of Beta-adducin;Isoform of P35612, Isoform 9 of Beta-adducin	ADD2
17512.1	16403.8	21370.8	14071.4	11831.8	6914.61	10618.3	16427.4	10977.7	14697.5	14365.6	12153.3	24102.4	8268.33	14644.2	3926.88	13773.6	7936.61	19	20	21	21	19	13	17	19	19	20	14	20	20	8	20	6	16	17	Q9UEY8-2	Q9UEY8-2	Homo sapiens	ADDG_HUMAN	Isoform of Q9UEY8, Isoform 1 of Gamma-adducin	ADD3
16319.6	12568.8	20681.5	13767	19846.8	15755.5	15202.6	20688.2	24478.5	19370.8	13806.8	19025.4	22617.8	22462	24778	8957.76	16214.8	22965.5	9	7	9	9	9	8	8	9	9	9	6	8	8	8	9	5	7	9	P48960;P48960-2;P48960-3	P48960;P48960-2;P48960-3	Homo sapiens	AGRE5_HUMAN	Adhesion G protein-coupled receptor E5;Isoform of P48960, Isoform 2 of Adhesion G protein-coupled receptor E5;Isoform of P48960, Isoform 3 of Adhesion G protein-coupled receptor E5	ADGRE5
17990.6	6816.11	7809.74	1281.51	2738.74	1755.87	2250.58	2732.6	1638.45	NaN	NaN	5138.64	3004.9	NaN	1974.68	4777.17	NaN	NaN	2	3	8	4	5	1	2	5	3	0	0	2	5	0	3	2	0	0	A0A6I8PIV6;A0A6I8PLG0;A0A6I8PRJ0;A0A6I8PRM6;A0A6I8PRQ0;A0A6I8PTT2;A0A6I8PUE4;A0A8I5KUX3;B1ALU1;B1ALU3;O95490;O95490-2;O95490-3;O95490-4;O95490-5;O95490-6;O95490-7	A0A6I8PIV6;A0A6I8PLG0;A0A6I8PRJ0;A0A6I8PRM6;A0A6I8PRQ0;A0A6I8PTT2;A0A6I8PUE4;A0A8I5KUX3;B1ALU1;B1ALU3;O95490;O95490-2;O95490-3;O95490-4;O95490-5;O95490-6;O95490-7	Homo sapiens	A0A6I8PIV6_HUMAN;A0A6I8PLG0_HUMAN;A0A6I8PRJ0_HUMAN;A0A6I8PRM6_HUMAN;A0A6I8PRQ0_HUMAN;A0A6I8PTT2_HUMAN;A0A6I8PUE4_HUMAN;A0A8I5KUX3_HUMAN;B1ALU1_HUMAN;B1ALU3_HUMAN;AGRL2_HUMAN;AGRL2_HUMAN;AGRL2_HUMAN;AGRL2_HUMAN;AGRL2_HUMAN;AGRL2_HUMAN;AGRL2_HUMAN	Isoform of O95490, Adhesion G protein-coupled receptor L2;Isoform of O95490, Adhesion G protein-coupled receptor L2;Isoform of O95490, Adhesion G protein-coupled receptor L2;Isoform of O95490, Adhesion G protein-coupled receptor L2;Isoform of O95490, Adhesion G protein-coupled receptor L2;Isoform of O95490, Adhesion G protein-coupled receptor L2;Isoform of O95490, Adhesion G protein-coupled recep…	ADGRL2
2065.03	NaN	NaN	1549.08	NaN	NaN	NaN	NaN	NaN	NaN	NaN	NaN	NaN	NaN	5757.58	NaN	NaN	NaN	2	0	0	5	0	0	0	0	0	0	0	0	0	0	2	0	0	0	P00325;V9HW50	P00325;V9HW50	Homo sapiens	ADH1B_HUMAN;V9HW50_HUMAN	All-trans-retinol dehydrogenase [NAD(+)] ADH1B;Isoform of P00325, All-trans-retinol dehydrogenase [NAD(+)] ADH1B	ADH1B
81311.7	84803.2	77238.8	97456.6	72093.8	88074.5	95909.1	84263.1	78534.5	66809.7	108572	59525.2	74024.9	74557.7	62939.9	113085	88076	72859	13	14	16	17	16	16	14	15	16	16	13	15	15	10	16	14	15	14	P11766	P11766	Homo sapiens	ADHX_HUMAN	Alcohol dehydrogenase class-3	ADH5
7356.29	6821.02	14595.7	16321.9	6072.07	9504.04	7779.55	5445.39	5078.73	14830.8	6967.58	9843.62	6733.61	7471.58	6136.01	3828.01	5451.83	9159.69	9	11	13	13	7	10	9	8	8	12	8	13	11	4	13	3	8	7	Q9BV57	Q9BV57	Homo sapiens	MTND_HUMAN	Acireductone dioxygenase	ADI1
20935.4	12980.3	13306.1	18693.5	11928.4	8158.37	19194.3	20550	10943.3	12270.6	20978.7	17428.8	45072.2	12364.7	21335.1	9726.85	24894.4	9461.41	8	6	7	7	7	6	7	7	6	7	7	8	8	5	8	6	8	7	Q15847	Q15847	Homo sapiens	ADIRF_HUMAN	Adipogenesis regulatory factor	ADIRF
32798.4	42049.3	29699.5	27913.4	27704.7	35756.8	39535.7	39942.2	40778.9	33132	47229.9	41311.9	46829.1	60735.5	40418.9	60569.4	39331.6	28557.5	11	10	12	11	10	11	9	11	11	13	9	12	12	9	13	9	10	11	P55263;P55263-2	P55263;P55263-2	Homo sapiens	ADK_HUMAN	Adenosine kinase;Isoform of P55263, Isoform 2 of Adenosine kinase	ADK
12161.8	8737.31	8000.61	9475.16	6810.79	5334.92	7255.57	6443.4	5753.37	5958.68	NaN	7153.18	7495.25	NaN	5600.34	NaN	6922.81	5150.22	3	3	3	3	4	3	1	3	1	3	0	4	3	0	3	0	1	3	A0A669KBJ7;Q9H2P0	A0A669KBJ7;Q9H2P0	Homo sapiens	A0A669KBJ7_HUMAN;ADNP_HUMAN	Isoform of Q9H2P0, Activity dependent neuroprotector homeobox;Activity-dependent neuroprotector homeobox protein	ADNP
5507.8	6615.63	5509.09	6518.12	5418.83	8438.21	5193.96	4330.29	4747.1	5712.35	5599.4	5672.15	4217.91	7249.52	5570.04	8095.17	4137.57	6886.46	2	2	2	3	3	2	3	2	1	2	2	2	2	1	1	1	2	2	Q96SZ5	Q96SZ5	Homo sapiens	AEDO_HUMAN	2-aminoethanethiol dioxygenase	ADO
8040.27	7333.13	5680.08	6407.72	8058.52	5774.62	8853.87	6207.89	6063.54	4840.44	5335.83	5194.96	7023.62	4641.18	5806.36	4492.89	5752.51	3550.66	7	6	5	6	6	4	6	5	5	6	4	5	7	2	6	3	5	5	Q9BRR6;Q9BRR6-2	Q9BRR6;Q9BRR6-2	Homo sapiens	ADPGK_HUMAN	ADP-dependent glucokinase;Isoform of Q9BRR6, Isoform 2 of ADP-dependent glucokinase	ADPGK
15082.9	13163.4	14510.4	15577.9	14246.4	17082.6	15203.3	11910.8	13364.3	12060.6	17338.3	13816.1	14484	13582.4	13181.4	17260	14468.4	13880.6	8	10	10	10	10	10	10	9	8	10	9	10	10	8	10	10	8	10	Q9NX46	Q9NX46	Homo sapiens	ADPRS_HUMAN	ADP-ribosylhydrolase ARH3	ADPRS
10308.5	11534.7	9752.19	9994.49	9985.57	8135.72	9658.24	7987.2	7364.12	8801.2	9030.45	9939.22	9131.6	12182.2	9487.96	12506.7	7242.48	10821.6	5	4	5	5	5	5	5	5	5	5	5	4	5	3	5	3	5	5	A0A087WX59;Q16186	A0A087WX59;Q16186	Homo sapiens	A0A087WX59_HUMAN;ADRM1_HUMAN	Isoform of Q16186, ADRM1 26S proteasome ubiquitin receptor;Proteasomal ubiquitin receptor ADRM1	ADRM1
13023.6	13630	15768.5	16374.2	12885.3	17033.2	13213.9	13954.8	14646.7	15017.7	16993.4	14070	12458.3	15568.5	14586.8	18301.2	12350.1	18032.2	14	13	16	16	16	15	13	13	14	16	15	15	15	10	16	12	15	14	A0A096LNY6;A0A1B0GTJ7;A0A1B0GWJ0;A0A7P0T9A7;A0A7P0Z472;P30566	A0A096LNY6;A0A1B0GTJ7;A0A1B0GWJ0;A0A7P0T9A7;A0A7P0Z472;P30566	Homo sapiens	A0A096LNY6_HUMAN;A0A1B0GTJ7_HUMAN;A0A1B0GWJ0_HUMAN;A0A7P0T9A7_HUMAN;A0A7P0Z472_HUMAN;PUR8_HUMAN	Isoform of P30566, Adenylosuccinate lyase;Isoform of P30566, Adenylosuccinate lyase;Isoform of P30566, Adenylosuccinate lyase;Isoform of P30566, Adenylosuccinate lyase;Isoform of P30566, Adenylosuccinate lyase;Adenylosuccinate lyase	ADSL
39059.4	38778.4	41892.7	39986.7	42557.4	48593.8	42199.6	42012.5	50014.5	42514.1	40667.4	44167.9	42543.3	59074.4	48901.8	36912.3	41408.3	45462.8	17	17	20	22	17	18	16	20	19	20	15	17	19	15	18	14	18	18	P30520	P30520	Homo sapiens	PURA2_HUMAN	Adenylosuccinate synthetase isozyme 2	ADSS2
2921	2239.81	7608.02	3197.26	3804.98	3639.65	3111.62	4215.93	5782.37	4420.5	3484.91	4023.77	3059.55	2801.6	3704.93	NaN	4355.5	4021.97	4	1	6	5	2	4	4	5	5	6	3	4	4	1	3	0	5	5	Q8N556;Q8N556-2	Q8N556;Q8N556-2	Homo sapiens	AFAP1_HUMAN	Actin filament-associated protein 1;Isoform of Q8N556, Isoform 2 of Actin filament-associated protein 1	AFAP1
6013.55	4821.97	4024.89	5464.8	7211.2	5241.94	4055.09	6182.67	NaN	5863.07	NaN	5776.98	NaN	NaN	NaN	NaN	NaN	5590.51	1	1	1	1	1	1	1	1	0	1	0	1	0	0	0	0	0	1	A0A804HJ20;A8MQ02;H0Y8L4;H0Y8U8;H0Y948;J3KN01;P55196;P55196-1;P55196-5	A0A804HJ20;A8MQ02;H0Y8L4;H0Y8U8;H0Y948;J3KN01;P55196;P55196-1;P55196-5	Homo sapiens	A0A804HJ20_HUMAN;A8MQ02_HUMAN;H0Y8L4_HUMAN;H0Y8U8_HUMAN;H0Y948_HUMAN;J3KN01_HUMAN;AFAD_HUMAN;AFAD_HUMAN;AFAD_HUMAN	Isoform of P55196, Afadin, adherens junction formation factor;Isoform of P55196, Afadin, adherens junction formation factor;Isoform of P55196, Afadin, adherens junction formation factor (Fragment);Isoform of P55196, Afadin, adherens junction formation factor;Isoform of P55196, Afadin, adherens junction formation factor (Fragment);Isoform of P55196, Afadin, adherens junction formation factor;Afadi…	AFDN
2351.39	886.987	2099	1640.8	1590.47	969.448	608.867	1728.27	1038.32	1656.79	1.2111	1440.66	2628.42	NaN	1353.18	NaN	300.449	1927.4	1	1	1	1	1	1	1	1	1	1	1	1	1	0	1	0	1	1	Q9UHB7;Q9UHB7-2	Q9UHB7;Q9UHB7-2	Homo sapiens	AFF4_HUMAN	AF4/FMR2 family member 4;Isoform of Q9UHB7, Isoform 2 of AF4/FMR2 family member 4	AFF4
15670.5	15439.4	14744.9	13298.4	15855.5	12987.8	15851.2	11922.9	13382.4	19577.2	11672.9	15117.5	15057.6	11271.6	14391.6	15163.2	14755.7	11098.7	17	16	19	19	17	17	17	17	15	19	16	17	19	10	18	13	18	18	A0A8I5KVV1;Q9Y4W6	A0A8I5KVV1;Q9Y4W6	Homo sapiens	A0A8I5KVV1_HUMAN;AFG32_HUMAN	Isoform of Q9Y4W6, AFG3 like matrix AAA peptidase subunit 2;AFG3-like protein 2	AFG3L2
NaN	NaN	NaN	NaN	NaN	378.908	1880.6	NaN	1097.55	NaN	4997.78	938.508	307.762	28828.9	NaN	7373.22	624.752	2788.83	0	0	0	0	0	1	1	0	1	0	1	1	1	1	0	1	1	1	P43652	P43652	Homo sapiens	AFAM_HUMAN	Afamin	AFM
11955.6	13224.3	9947.09	10435.9	19109.2	23965.3	27377.4	18643.3	19959.5	8904.23	63706.1	21789.3	7810.15	148999	12805.2	95279.9	20308	27962.1	6	7	7	6	7	8	8	8	8	7	8	8	7	8	7	8	7	8	J3KMX3;P02771	J3KMX3;P02771	Homo sapiens	J3KMX3_HUMAN;FETA_HUMAN	Isoform of P02771, Alpha fetoprotein;Alpha-fetoprotein	AFP
17450.2	18116.2	20096.7	14859	16027.8	12463.3	12495.6	11940.4	13044.2	15185.1	11699.7	15799.6	13944.1	11628.9	14534.3	14524	12614.9	17176.7	9	6	10	10	9	8	9	8	9	9	8	9	9	7	9	6	9	7	P52594;P52594-2;P52594-3;P52594-4	P52594;P52594-2;P52594-3;P52594-4	Homo sapiens	AGFG1_HUMAN	Arf-GAP domain and FG repeat-containing protein 1;Isoform of P52594, Isoform 2 of Arf-GAP domain and FG repeat-containing protein 1;Isoform of P52594, Isoform 3 of Arf-GAP domain and FG repeat-containing protein 1;Isoform of P52594, Isoform 4 of Arf-GAP domain and FG repeat-containing protein 1	AGFG1
17908.5	15353.3	16802.6	14617.5	16283.5	17378.6	21064.9	15940.4	17852.1	14326.7	14719.1	21583.4	22609	19862.7	19314.4	22102.3	21927.9	14504	6	6	8	8	7	7	7	7	7	8	6	8	8	3	8	6	7	6	A0A3B3ISY9;A0A3B3ITD0;E9PC15;Q53H12	A0A3B3ISY9;A0A3B3ITD0;E9PC15;Q53H12	Homo sapiens	A0A3B3ISY9_HUMAN;A0A3B3ITD0_HUMAN;E9PC15_HUMAN;AGK_HUMAN	Isoform of Q53H12, Acylglycerol kinase, mitochondrial;Isoform of Q53H12, Acylglycerol kinase, mitochondrial;Isoform of Q53H12, Acylglycerol kinase, mitochondrial;Acylglycerol kinase, mitochondrial	AGK
54237.7	62932.7	46447.3	42585.2	60809.8	60475.2	54376.6	25906.2	53397.6	50262.4	78216.3	59555.3	29128.4	51598.9	46794.4	65468.6	60050.5	58904.7	5	4	4	5	4	5	4	3	4	4	3	4	3	2	5	4	3	4	P35573;P35573-2;P35573-3	P35573;P35573-2;P35573-3	Homo sapiens	GDE_HUMAN	Glycogen debranching enzyme;Isoform of P35573, Isoform 5 of Glycogen debranching enzyme;Isoform of P35573, Isoform 6 of Glycogen debranching enzyme	AGL
7071.11	9570.69	6547.28	9263.39	7876.73	7942.42	NaN	5506.11	7215.36	8177.97	4476.22	4142.86	6500.49	NaN	6954.53	4301.35	5506.49	6709.93	1	1	1	1	1	1	0	1	1	1	1	1	1	0	1	1	1	1	A0A6I8PTZ8;A0A8V8TNY0;Q5TA58;Q9UL18	A0A6I8PTZ8;A0A8V8TNY0;Q5TA58;Q9UL18	Homo sapiens	A0A6I8PTZ8_HUMAN;A0A8V8TNY0_HUMAN;Q5TA58_HUMAN;AGO1_HUMAN	Isoform of Q9UL18, Argonaute RISC component 1;Isoform of Q9UL18, Argonaute RISC component 1 (Fragment);Isoform of Q9UL18, Argonaute RISC component 1;Protein argonaute-1	AGO1
4765.7	3716.4	4549.55	4369.91	4242.86	4497.28	3411.61	3570.19	3693.28	3610.92	4926.42	3693.29	3549.54	3478.88	3539.21	3484.1	2875.37	5544.23	6	5	6	6	6	6	6	5	6	6	3	5	5	2	5	4	5	6	Q9UKV8	Q9UKV8	Homo sapiens	AGO2_HUMAN	Protein argonaute-2	AGO2
NaN	NaN	NaN	844.872	NaN	NaN	NaN	NaN	NaN	NaN	NaN	978.097	NaN	NaN	8670.48	NaN	NaN	NaN	0	0	0	1	0	0	0	0	0	0	0	1	0	0	1	0	0	0	Q99943	Q99943	Homo sapiens	PLCA_HUMAN	1-acyl-sn-glycerol-3-phosphate acyltransferase alpha	AGPAT1
3897.9	2576.14	3487.26	4044.44	3931.15	4171.42	3618.48	2739.5	2556.97	4691.24	2603.07	3029.55	3395.07	NaN	3885.83	3251.06	4069.12	2383.54	4	4	4	4	3	3	3	4	4	4	2	4	3	0	4	2	4	4	Q9NRZ7;Q9NRZ7-2;Q9NRZ7-3	Q9NRZ7;Q9NRZ7-2;Q9NRZ7-3	Homo sapiens	PLCC_HUMAN	1-acyl-sn-glycerol-3-phosphate acyltransferase gamma;Isoform of Q9NRZ7, Isoform 2 of 1-acyl-sn-glycerol-3-phosphate acyltransferase gamma;Isoform of Q9NRZ7, Isoform 3 of 1-acyl-sn-glycerol-3-phosphate acyltransferase gamma	AGPAT3
2597.6	NaN	1066.73	1917.52	1895.84	1479.91	NaN	2033.18	1361.76	3644.46	NaN	NaN	NaN	NaN	2454.35	NaN	NaN	2264.94	1	0	1	1	1	1	0	1	1	1	0	0	0	0	1	0	0	1	H0Y5R3;Q9NRZ5;Q9NRZ5-2	H0Y5R3;Q9NRZ5;Q9NRZ5-2	Homo sapiens	H0Y5R3_HUMAN;PLCD_HUMAN;PLCD_HUMAN	Isoform of Q9NRZ5, 1-acylglycerol-3-phosphate O-acyltransferase 4 (Fragment);1-acyl-sn-glycerol-3-phosphate acyltransferase delta;Isoform of Q9NRZ5, Isoform 2 of 1-acyl-sn-glycerol-3-phosphate acyltransferase delta	AGPAT4
50122.3	52083.9	48636.6	49180.2	50505.1	56194.8	56959.1	52794.7	56863	51423.7	52515.8	47876.7	52035.2	59577.5	54326.5	49611.2	49064.1	47414.9	17	19	21	20	19	18	20	20	17	21	16	20	21	11	20	14	18	18	O00116	O00116	Homo sapiens	ADAS_HUMAN	Alkyldihydroxyacetonephosphate synthase, peroxisomal	AGPS
45643.2	36911.9	14307.4	18848	40936.8	29467.8	22471.9	21242.2	38294.6	27911.2	53714.5	36946.2	23576.2	26118.9	47511.6	49640.1	22939.2	30075.3	1	1	1	1	1	1	1	1	1	1	1	1	1	1	1	1	1	1	Q6RW13;Q6RW13-2	Q6RW13;Q6RW13-2	Homo sapiens	ATRAP_HUMAN	Type-1 angiotensin II receptor-associated protein;Isoform of Q6RW13, Isoform 2 of Type-1 angiotensin II receptor-associated protein	AGTRAP
73323.3	81040.6	86329.4	91927.9	71630.5	95644.7	101928	97519.3	87805.9	79387.5	131817	79342.8	65835.1	137658	69968.8	132518	93061.9	85057.2	17	18	24	24	18	22	21	21	20	21	21	21	21	17	20	18	20	21	P23526	P23526	Homo sapiens	SAHH_HUMAN	Adenosylhomocysteinase	AHCY
14738.4	16494.7	16497	17663.2	15197.2	16025.1	11968.5	16641	11466.3	14654.2	13152.5	14090.6	16201.5	12674.5	14295.4	13997	20022.8	12272.2	12	10	12	12	12	11	10	12	12	12	8	11	12	5	10	5	11	10	O43865	O43865	Homo sapiens	SAHH2_HUMAN	S-adenosylhomocysteine hydrolase-like protein 1	AHCYL1
2680.42	3135.64	2388.7	3479.95	2467.6	2692.72	2115.3	2450.58	2052.19	2491.18	1872.27	1399.44	2324.76	NaN	2437	2327.11	4469.32	1589.61	1	1	1	1	1	1	1	1	1	1	1	1	1	0	1	1	1	1	Q96HN2;Q96HN2-2	Q96HN2;Q96HN2-2	Homo sapiens	SAHH3_HUMAN	Adenosylhomocysteinase 3;Isoform of Q96HN2, Isoform 2 of Adenosylhomocysteinase 3	AHCYL2
573256	651741	511573	572866	490768	565691	649186	740551	601273	785162	592120	616837	901141	462066	623209	581437	780605	482685	443	446	487	492	446	451	445	463	469	508	431	495	479	347	497	387	484	440	Q09666	Q09666	Homo sapiens	AHNK_HUMAN	Neuroblast differentiation-associated protein AHNAK	AHNAK
516011	825046	544277	860386	536972	818179	1702520	494828	960318	894642	1123370	667315	872607	559132	595479	1097840	975644	603772	122	144	149	147	131	150	154	125	149	156	129	143	143	69	141	130	154	129	Q8IVF2-3	Q8IVF2-3	Homo sapiens	AHNK2_HUMAN	Isoform of Q8IVF2, Isoform 3 of Protein AHNAK2	AHNAK2
4769.97	NaN	2523.87	1427.56	2616.88	2206.38	965.667	928.035	NaN	NaN	NaN	1285.95	3077.18	NaN	1391.97	NaN	712.186	NaN	4	0	3	3	1	2	2	2	0	0	0	2	3	0	3	0	1	0	A0A1B0GVI7;A0A2R8Y7G1;P35869	A0A1B0GVI7;A0A2R8Y7G1;P35869	Homo sapiens	A0A1B0GVI7_HUMAN;A0A2R8Y7G1_HUMAN;AHR_HUMAN	readthrough, Aryl hydrocarbon receptor (Fragment);Isoform of P35869, Aryl hydrocarbon receptor;Aryl hydrocarbon receptor	AHR
36531.6	50246.1	52871.7	48964.7	45961.4	53047.9	39524.9	44841.4	51024.1	45810.1	39606.8	33106.4	35333.9	55200.3	44957.4	41967.5	34014.1	49435.5	16	16	22	22	16	17	15	18	17	21	15	20	18	14	20	13	15	17	O95433	O95433	Homo sapiens	AHSA1_HUMAN	Activator of 90 kDa heat shock protein ATPase homolog 1	AHSA1
5191.12	6529.45	42676.9	40101.5	5894.42	58776	38457.6	49610.5	70372.4	29783.8	49538.9	22603.3	19698.3	105807	25476.8	88109.1	32642.1	65085.6	5	5	4	5	5	5	5	5	5	5	4	4	5	5	5	3	5	5	P02765	P02765	Homo sapiens	FETUA_HUMAN	Alpha-2-HS-glycoprotein	AHSG
24779.7	19221.2	16541.1	20951.7	16630.2	14296	15920.5	15555.2	13822	15999.5	18470.6	14743.8	16825.7	14015.7	14511.2	15909.6	18738.7	14300.6	12	11	12	11	11	11	10	11	11	11	9	10	11	5	12	8	12	12	Q96BJ3	Q96BJ3	Homo sapiens	AIDA_HUMAN	Axin interactor, dorsalization-associated protein	AIDA
35865.4	33515.8	40565.3	32815.5	39954.7	36178.2	48603.4	30220.6	37560.1	36822.5	34265.5	38490.8	34564.8	32704.7	33597	45374.8	45688.5	27875.3	18	19	21	20	19	19	20	17	18	21	19	20	19	16	20	18	19	18	A0A6Q8PFM5;A0A6Q8PG15;A0A7I2PK44;O95831;O95831-3	A0A6Q8PFM5;A0A6Q8PG15;A0A7I2PK44;O95831;O95831-3	Homo sapiens	A0A6Q8PFM5_HUMAN;A0A6Q8PG15_HUMAN;A0A7I2PK44_HUMAN;AIFM1_HUMAN;AIFM1_HUMAN	Isoform of O95831, Apoptosis inducing factor mitochondria associated 1;Isoform of O95831, Apoptosis inducing factor mitochondria associated 1;Isoform of O95831, Apoptosis inducing factor mitochondria associated 1;Apoptosis-inducing factor 1, mitochondrial;Isoform of O95831, Isoform 3 of Apoptosis-inducing factor 1, mitochondrial	AIFM1
61033.6	52474.3	63737.1	63828.1	60124.2	50333.7	45660.1	52129.7	49597.7	59577.8	54634.3	56757.8	54353.3	41293.3	50990.5	56599.3	51060.1	59899.8	18	18	21	21	19	18	17	18	17	20	14	19	20	12	20	16	19	19	Q12904;Q12904-2	Q12904;Q12904-2	Homo sapiens	AIMP1_HUMAN	Aminoacyl tRNA synthase complex-interacting multifunctional protein 1;Isoform of Q12904, Isoform 2 of Aminoacyl tRNA synthase complex-interacting multifunctional protein 1	AIMP1
10922.9	10115.8	12593.9	10700.9	11046.1	10604.8	9824.21	9302.04	9350.84	10673	8132.6	11170.1	9983.88	8011.85	8147.2	7686.6	7282.22	10934.8	9	9	10	10	9	10	9	10	10	10	7	9	10	6	9	9	9	10	Q13155	Q13155	Homo sapiens	AIMP2_HUMAN	Aminoacyl tRNA synthase complex-interacting multifunctional protein 2	AIMP2
25736.3	21218.1	21358.8	25521.2	19217.4	21963.4	14831.9	19955.7	16600.7	29876.8	20416	17811.5	25611.2	8331.22	19418.2	16342.2	16977.5	16377.9	11	10	13	12	10	11	10	10	11	12	10	11	11	6	12	8	10	10	A0A804HKH9;O00170	A0A804HKH9;O00170	Homo sapiens	A0A804HKH9_HUMAN;AIP_HUMAN	Isoform of O00170, peptidylprolyl isomerase (Fragment);AH receptor-interacting protein	AIP
71353.4	74575.7	59747.7	72160.1	61182.7	55848.9	64842	69553.2	55913.1	56110.7	72165.2	55785.9	84532	56868.5	79916.9	88952.5	92363.8	38599.2	16	16	14	16	15	15	14	13	13	15	13	16	15	10	14	14	15	14	P00568;Q5T9B7	P00568;Q5T9B7	Homo sapiens	KAD1_HUMAN;Q5T9B7_HUMAN	Adenylate kinase isoenzyme 1;Isoform of P00568, Adenylate kinase isoenzyme 1	AK1
28178.2	20298.7	34515.1	33759.9	28900.3	23042.6	28029.4	24922.6	22991.3	31099.8	23262.3	24094.3	30540.9	24307.7	21508.3	26942.6	28582.7	22867.6	18	16	20	20	18	18	17	19	17	20	17	17	18	12	18	16	18	18	F8W1A4;P54819;P54819-2	F8W1A4;P54819;P54819-2	Homo sapiens	F8W1A4_HUMAN;KAD2_HUMAN;KAD2_HUMAN	Isoform of P54819, Adenylate kinase 2, mitochondrial;Adenylate kinase 2, mitochondrial;Isoform of P54819, Isoform 2 of Adenylate kinase 2, mitochondrial	AK2
74118.4	73291.8	74674.2	78606.6	70109.2	60955.2	70329.6	64068.9	56557.1	53927.2	72118	98418.2	74781.4	76343.7	60732.5	164521	166764	49134	17	17	18	18	16	16	17	17	16	16	15	17	18	11	18	17	17	16	Q9UIJ7	Q9UIJ7	Homo sapiens	KAD3_HUMAN	GTP:AMP phosphotransferase AK3, mitochondrial	AK3
19219.4	18786.3	27007.6	20275.4	19208.1	21190.8	32157.7	5155.24	7576.25	9018.09	15885.7	11326	12137.6	6415.34	3328.79	20161.2	1154.2	12997.4	13	13	15	15	13	13	15	6	10	12	12	14	13	4	8	11	4	10	P27144	P27144	Homo sapiens	KAD4_HUMAN	Adenylate kinase 4, mitochondrial	AK4
51232.6	56810.1	28592.6	51578.2	53296	61480.3	42449.4	57658.9	37181.3	68257.6	59932.5	42869.6	67605.7	52181.7	57036.6	47888.3	51277.2	45043.2	17	17	18	18	17	18	17	17	17	17	18	17	17	15	18	15	17	16	Q9Y6K8;Q9Y6K8-3	Q9Y6K8;Q9Y6K8-3	Homo sapiens	KAD5_HUMAN	Adenylate kinase isoenzyme 5;Isoform of Q9Y6K8, Isoform 3 of Adenylate kinase isoenzyme 5	AK5
12438.6	19528.7	17270	14567.6	20208.4	19750.5	15151.4	14912.9	22666.1	12948.3	13184.4	14160.4	14057.3	21931.6	17892.2	14572.7	6179.26	20593.6	5	4	5	5	5	5	5	5	5	5	5	5	5	3	5	4	3	5	Q9Y3D8	Q9Y3D8	Homo sapiens	KAD6_HUMAN	Adenylate kinase isoenzyme 6	AK6
3582.49	2485.42	3366.7	1888.65	3477.34	2250.11	1536.16	1811.46	2334.25	1943.43	1185.07	2096.48	2055.56	NaN	1554.3	1223.87	2084.57	1510.42	2	1	2	2	2	2	2	2	2	2	1	2	2	0	2	1	1	2	E7EMD6;O43572	E7EMD6;O43572	Homo sapiens	E7EMD6_HUMAN;AKA10_HUMAN	Isoform of O43572, A-kinase anchoring protein 10;A-kinase anchor protein 10, mitochondrial	AKAP10
3022.1	2730.15	1775.68	1941.44	3719.24	1671.4	1563.39	2804	1197.34	2374.43	1083.09	2504.86	3053.78	2997.22	3059.02	NaN	1709.59	1104.07	4	4	4	3	4	3	3	4	2	3	3	4	4	1	4	0	2	4	Q9UKA4	Q9UKA4	Homo sapiens	AKA11_HUMAN	A-kinase anchor protein 11	AKAP11
19068.3	10937.7	33556.8	19956.2	16216.1	7818.59	9626.61	8245.99	14808.7	14148.2	14001.1	9881.2	35093	8484.58	10821.2	9723.61	10989.5	9664.96	68	59	77	75	73	59	51	59	66	70	59	64	76	26	64	43	56	57	Q02952;Q02952-2;Q02952-3	Q02952;Q02952-2;Q02952-3	Homo sapiens	AKA12_HUMAN	A-kinase anchor protein 12;Isoform of Q02952, Isoform 2 of A-kinase anchor protein 12;Isoform of Q02952, Isoform 3 of A-kinase anchor protein 12	AKAP12
3530.4	4426.57	2933.38	3464.92	4184.46	3879.15	3599.19	3671.34	2911.23	3002.55	2862.76	4270.53	2357.47	5863.46	2881.48	3060.47	3116.09	3167.71	8	7	8	9	9	8	5	9	4	9	5	7	8	2	9	3	8	7	Q12802;Q12802-2;Q12802-4	Q12802;Q12802-2;Q12802-4	Homo sapiens	AKP13_HUMAN	A-kinase anchor protein 13;Isoform of Q12802, Isoform 2 of A-kinase anchor protein 13;Isoform of Q12802, Isoform 3 of A-kinase anchor protein 13	AKAP13
56014.6	67462.6	52070.2	68573.8	64010.1	60204.7	72508.3	51734.8	52061	40887.2	85613.2	48823.5	68494.2	41604.2	43155.1	100368	61779.3	50382.4	46	47	52	53	51	49	45	46	47	49	44	50	53	26	48	46	48	48	Q9Y2D5-6	Q9Y2D5-6	Homo sapiens	AKAP2_HUMAN	Isoform of Q9Y2D5, Isoform 4 of A-kinase anchor protein 2	AKAP2
1197.43	4487.85	3088.52	3068.25	4672.99	2282.02	NaN	4486.52	2996.56	3143.53	665.51	1655.94	2284.34	1067.96	4347.82	1724.44	2769.36	5232.09	4	1	5	5	4	3	0	4	3	5	1	3	4	1	4	1	1	4	A0A7P0T893;O43823	A0A7P0T893;O43823	Homo sapiens	A0A7P0T893_HUMAN;AKAP8_HUMAN	Isoform of O43823, A-kinase anchoring protein 8;A-kinase anchor protein 8	AKAP8
21263.4	19470.8	15387	14562.4	14198.4	11796.1	12186.4	12312.7	15917.8	14187.2	17572.5	14019.3	15967.4	14119.6	11442.8	13465.6	16017.2	13903.6	9	12	12	11	12	11	6	12	9	12	7	12	9	5	12	8	7	11	A0A0A0MRF6;A0A7P0T928;A0A7P0T9A9;A0A7P0TAD6;A0A7P0TBH8;A0A7P0TBI4;A0A7P0Z4N5;A0A7P0Z4Q5;Q99996;Q99996-1;Q99996-3;Q99996-5;Q99996-6	A0A0A0MRF6;A0A7P0T928;A0A7P0T9A9;A0A7P0TAD6;A0A7P0TBH8;A0A7P0TBI4;A0A7P0Z4N5;A0A7P0Z4Q5;Q99996;Q99996-1;Q99996-3;Q99996-5;Q99996-6	Homo sapiens	A0A0A0MRF6_HUMAN;A0A7P0T928_HUMAN;A0A7P0T9A9_HUMAN;A0A7P0TAD6_HUMAN;A0A7P0TBH8_HUMAN;A0A7P0TBI4_HUMAN;A0A7P0Z4N5_HUMAN;A0A7P0Z4Q5_HUMAN;AKAP9_HUMAN;AKAP9_HUMAN;AKAP9_HUMAN;AKAP9_HUMAN;AKAP9_HUMAN	Isoform of Q99996, A-kinase anchoring protein 9;Isoform of Q99996, A-kinase anchoring protein 9;Isoform of Q99996, A-kinase anchoring protein 9;Isoform of Q99996, A-kinase anchoring protein 9;Isoform of Q99996, A-kinase anchoring protein 9;Isoform of Q99996, A-kinase anchoring protein 9;Isoform of Q99996, A-kinase anchoring protein 9;Isoform of Q99996, A-kinase anchoring protein 9;A-kinase anchor…	AKAP9
29933.4	27348.1	38524.8	30531.5	26893.8	28660.9	24476.3	29626.3	22175.2	22238.6	32976.9	23919.6	26104.4	23286.8	24186.5	35084.1	39560.2	26873.9	17	18	22	22	18	18	17	19	16	22	16	18	19	12	18	15	18	17	P14550	P14550	Homo sapiens	AK1A1_HUMAN	Aldo-keto reductase family 1 member A1	AKR1A1
48449.4	37812	29591.8	26811.5	26959.5	33698.2	28637.5	49134.3	29324.5	25374	31973.9	27454.8	25876.5	58371.4	37110.7	46156.5	93322.6	28229.7	14	12	15	15	14	13	12	13	13	14	12	13	13	11	13	11	15	13	P15121	P15121	Homo sapiens	ALDR_HUMAN	Aldo-keto reductase family 1 member B1	AKR1B1
47908.7	64461.5	40020.2	33465.6	75559.2	31689.2	38555.6	34626.7	48364	30242.2	38462.8	53093.2	32202.2	37716.8	24431.6	25176.9	60765.9	44634.1	24	24	25	24	24	22	23	26	21	25	22	24	24	15	25	13	25	24	Q04828	Q04828	Homo sapiens	AK1C1_HUMAN	Aldo-keto reductase family 1 member C1	AKR1C1
22421.3	9370.17	8062.92	15610.9	54133.6	22197	16079.7	15062	12494.8	24258.7	29259.5	10572	21388.2	NaN	14873.1	NaN	19459.3	12078.4	2	2	2	2	2	2	2	2	2	1	2	2	2	0	2	0	2	2	B4DK69	B4DK69	Homo sapiens	B4DK69_HUMAN	Isoform of P52895, Aldo-keto reductase family 1 member C2	AKR1C2
12051.4	16706.7	18079.4	22562	17686.5	8618.99	21950.8	NaN	6662.36	6609.09	10122.1	13495.4	19194.2	NaN	13319.4	NaN	52702.1	9288.76	1	1	1	1	1	1	1	0	1	1	1	1	1	0	1	0	1	1	A0A0A0MSS8;P42330	A0A0A0MSS8;P42330	Homo sapiens	A0A0A0MSS8_HUMAN;AK1C3_HUMAN	Isoform of P42330, Aldo-keto reductase family 1 member C3;Aldo-keto reductase family 1 member C3	AKR1C3
19317.5	22515.2	21693.6	25912.8	18714.4	22762.1	18596	22368.2	12946.5	17502.9	20769.5	15092.7	20082	13813.2	23455.9	28386.7	25727.5	13826.1	10	11	11	11	10	11	11	11	11	11	11	11	11	7	11	10	11	11	H3BLU7;O43488	H3BLU7;O43488	Homo sapiens	H3BLU7_HUMAN;ARK72_HUMAN	Isoform of O43488, Aldo-keto reductase family 7 member A2 (Fragment);Aflatoxin B1 aldehyde reductase member 2	AKR7A2
4063.11	3971.06	3722.08	3930.56	3969.65	3372.63	2360.13	3511.85	3430.81	3633.44	3560.66	3160.6	3843.54	2792.84	4291.5	2979.18	3296.92	2895.78	9	8	10	9	9	10	5	9	7	9	8	7	8	6	8	7	10	8	A0A804HJM6	A0A804HJM6	Homo sapiens	A0A804HJM6_HUMAN	Isoform of P31749, non-specific serine/threonine protein kinase	AKT1
9088.61	9494.47	9951.64	9917.65	10976.8	9129.3	8208.74	5799.03	5246.28	10957	7813.55	9132.87	8918.82	8013.57	8184.79	8388.92	6665.87	10123.4	4	4	6	6	4	3	3	4	4	4	4	6	5	1	6	3	4	4	Q96B36	Q96B36	Homo sapiens	AKTS1_HUMAN	Proline-rich AKT1 substrate 1	AKT1S1
2408.81	1976.73	2385.64	2039.05	2249.77	2369.9	2200.05	2021.73	1315.8	2591.86	2786.62	1556.02	2623.6	722.158	2605.84	1174.43	1493.75	287.106	5	4	4	5	5	5	2	5	5	5	2	4	5	1	4	2	4	4	M0R0P9;P31751;P31751-2	M0R0P9;P31751;P31751-2	Homo sapiens	M0R0P9_HUMAN;AKT2_HUMAN;AKT2_HUMAN	Isoform of P31751, non-specific serine/threonine protein kinase;RAC-beta serine/threonine-protein kinase;Isoform of P31751, Isoform 2 of RAC-beta serine/threonine-protein kinase	AKT2
9241.34	8081.79	6065.56	7003.91	7133	7446.39	5114.28	6994.65	6242.33	5703.47	6978.46	4133.69	4739.52	4153.41	5203.01	4290.26	2675.71	4585.74	3	3	3	3	2	2	2	3	2	3	2	3	3	1	4	2	2	2	A0A5K1VW74;A0A7P0T8T9;Q9Y243;Q9Y243-2	A0A5K1VW74;A0A7P0T8T9;Q9Y243;Q9Y243-2	Homo sapiens	A0A5K1VW74_HUMAN;A0A7P0T8T9_HUMAN;AKT3_HUMAN;AKT3_HUMAN	Isoform of Q9Y243, non-specific serine/threonine protein kinase;Isoform of Q9Y243, non-specific serine/threonine protein kinase;RAC-gamma serine/threonine-protein kinase;Isoform of Q9Y243, Isoform 2 of RAC-gamma serine/threonine-protein kinase	AKT3
14675.5	13468	10692.1	17551	12049.3	15670.5	11881.1	13152.1	9284.33	11966	20393.4	8650.7	15068.2	4738.21	12520.1	23051.7	18655.6	9620.12	4	3	5	5	3	4	4	5	4	5	4	3	5	2	5	3	5	3	P13716	P13716	Homo sapiens	HEM2_HUMAN	Delta-aminolevulinic acid dehydratase	ALAD
1364730	1176590	754358	532994	2129100	2262760	3473340	2005740	2151240	516969	8378280	3222510	641567	35012500	1485630	13187600	1918930	5328730	10	10	12	11	10	12	11	12	12	11	11	10	10	10	11	10	12	11	A0A0C4DGB6;H0YA55;P02768	A0A0C4DGB6;H0YA55;P02768	Homo sapiens	A0A0C4DGB6_HUMAN;H0YA55_HUMAN;ALBU_HUMAN	Isoform of P02768, Albumin;Isoform of P02768, Albumin (Fragment);Albumin	ALB
28366.9	56570.8	35477.3	24126.6	41410.8	12027.4	33742.4	28848.8	48050.8	55733.9	41391.7	43684.5	36503.3	25383.3	45732.7	14669.9	21660.4	35012	19	22	22	20	20	15	19	19	22	22	17	19	23	16	22	10	16	21	Q13740-2	Q13740-2	Homo sapiens	CD166_HUMAN	Isoform of Q13740, Isoform 2 of CD166 antigen	ALCAM
7745.83	5732.56	7795.26	8635.02	8469.91	4948.66	3446.56	8469.78	5898.14	3880.69	5624.71	5094.1	9298.1	3105.19	8935.02	6946.43	7844.85	4510.54	7	5	10	10	6	5	4	7	7	6	3	7	7	3	10	2	7	5	Q8IZ83	Q8IZ83	Homo sapiens	A16A1_HUMAN	Aldehyde dehydrogenase family 16 member A1	ALDH16A1
65933	48200.6	68723.1	55878.7	56894.7	50521.4	69788.3	53334.3	51897.5	51689.8	44866.6	58258.3	56009.4	53047.4	57082.9	41598.9	61334	47672.9	35	35	40	40	36	38	37	39	38	40	33	34	37	27	37	25	36	35	P54886;P54886-2	P54886;P54886-2	Homo sapiens	P5CS_HUMAN	Delta-1-pyrroline-5-carboxylate synthase;Isoform of P54886, Isoform Short of Delta-1-pyrroline-5-carboxylate synthase	ALDH18A1
NaN	14958.6	NaN	NaN	NaN	NaN	997.824	1210.71	1473.01	NaN	3349.15	1742.22	NaN	NaN	NaN	1617.69	1217.43	1865.8	0	10	0	0	0	0	1	2	4	0	3	6	0	0	0	2	3	4	P00352	P00352	Homo sapiens	AL1A1_HUMAN	Aldehyde dehydrogenase 1A1	ALDH1A1
6966.42	23796	7459.93	10691.2	29219.2	3554.12	3534.56	8430.35	6947.62	NaN	15437.2	7109.31	NaN	40865.4	2869.53	8233.8	NaN	26552.1	11	14	16	17	14	6	7	2	9	0	10	11	0	12	8	6	0	16	P47895	P47895	Homo sapiens	AL1A3_HUMAN	Aldehyde dehydrogenase family 1 member A3	ALDH1A3
13870.4	10356.3	16804.9	11380.7	8933.62	6691.26	18527.7	9729.87	14501.8	17457.9	9175.25	14384.7	6824.9	7981.12	10608	7184.48	19600.7	3764.74	13	13	13	13	13	11	14	13	13	13	9	14	12	9	13	8	13	10	P30837	P30837	Homo sapiens	AL1B1_HUMAN	Aldehyde dehydrogenase X, mitochondrial	ALDH1B1
53318.6	23595	35469.5	29535.6	14019.1	17740.6	27246.5	19895	18798.4	26865.6	14864.9	31389.3	19268	13428.4	29649.3	13511.4	28809.8	20929.1	33	31	36	33	31	31	31	29	31	34	27	32	31	20	33	23	33	32	A0A494C1M4;Q3SY69	A0A494C1M4;Q3SY69	Homo sapiens	A0A494C1M4_HUMAN;AL1L2_HUMAN	Isoform of Q3SY69, 10-formyltetrahydrofolate dehydrogenase;Mitochondrial 10-formyltetrahydrofolate dehydrogenase	ALDH1L2
16128.7	20006.8	15865.3	13233.1	13350.8	8618.88	12446.1	10986.8	9092.26	8422.55	8599.78	12617.5	17086.5	12129.9	9678.28	10688.8	8697.42	9932.49	21	19	22	21	21	16	19	16	16	20	13	21	22	11	19	11	15	16	P05091	P05091	Homo sapiens	ALDH2_HUMAN	Aldehyde dehydrogenase, mitochondrial	ALDH2
11285.6	9497.06	7465.09	8797.75	7444.01	9880.32	12691.4	8994.96	6017.37	8465.84	10057.6	9153.3	19605.4	7834.15	10715.8	11661.6	16756.6	6891.26	11	9	11	11	10	12	11	11	10	12	11	9	12	4	11	10	11	9	A0A5F9ZHI5;A0A5F9ZHN9;J3QRD1;P51648;P51648-2	A0A5F9ZHI5;A0A5F9ZHN9;J3QRD1;P51648;P51648-2	Homo sapiens	A0A5F9ZHI5_HUMAN;A0A5F9ZHN9_HUMAN;J3QRD1_HUMAN;AL3A2_HUMAN;AL3A2_HUMAN	Isoform of P51648, Aldehyde dehydrogenase;Isoform of P51648, Aldehyde dehydrogenase;Isoform of P51648, Aldehyde dehydrogenase 3 family member A2;Aldehyde dehydrogenase family 3 member A2;Isoform of P51648, Isoform 2 of Aldehyde dehydrogenase family 3 member A2	ALDH3A2
2970.2	728.609	1148.29	1724.05	1382.3	1320.56	1186.07	2287.86	1933	1445.52	1836.53	1637.15	1685.14	NaN	2190.57	2614.4	5933.77	1189.46	5	2	4	6	2	4	1	6	1	4	2	5	5	0	6	1	6	4	P43353	P43353	Homo sapiens	AL3B1_HUMAN	Aldehyde dehydrogenase family 3 member B1	ALDH3B1
10914.7	12684.8	11009.8	11947.9	9463.73	8367.96	11376.9	15172.5	8394.44	13641.3	14719.9	12375.9	12227.6	9072.72	11862.8	16702.5	23150.4	8323.36	10	6	8	10	8	8	10	7	9	10	8	9	9	4	11	7	10	7	P30038	P30038	Homo sapiens	AL4A1_HUMAN	Delta-1-pyrroline-5-carboxylate dehydrogenase, mitochondrial	ALDH4A1
9030.61	7092.01	6946.14	11974.7	7919.87	5007.65	6960.79	6415.06	3796.91	8078	6246.83	6568.9	7957.86	3690.77	6668.36	5272.05	9479.71	4966.42	11	9	13	13	11	9	12	10	5	14	6	12	11	1	12	4	13	7	Q02252;Q02252-2	Q02252;Q02252-2	Homo sapiens	MMSA_HUMAN	Methylmalonate-semialdehyde dehydrogenase [acylating], mitochondrial;Isoform of Q02252, Isoform 2 of Methylmalonate-semialdehyde dehydrogenase [acylating], mitochondrial	ALDH6A1
33783.7	35416.1	28393	24909.5	30166	22621.2	25270.3	32578.1	31965	32010.1	24680.7	26999	33977.5	11653.4	36045	26361.7	39687.7	28231.1	17	20	22	20	17	16	16	20	18	21	14	18	19	9	22	12	18	16	A0A1B0GTG2;A0A1B0GW77;P49419;P49419-2	A0A1B0GTG2;A0A1B0GW77;P49419;P49419-2	Homo sapiens	A0A1B0GTG2_HUMAN;A0A1B0GW77_HUMAN;AL7A1_HUMAN;AL7A1_HUMAN	Isoform of P49419, Aldehyde dehydrogenase 7 family member A1;Isoform of P49419, aldehyde dehydrogenase (NAD(+));Alpha-aminoadipic semialdehyde dehydrogenase;Isoform of P49419, Isoform 2 of Alpha-aminoadipic semialdehyde dehydrogenase	ALDH7A1
NaN	17748.3	NaN	NaN	9804.19	11528.1	24640.5	20071.6	22630.2	NaN	26953.7	13441.8	11542.6	25853.7	13150.7	26585.7	13035.6	NaN	0	1	0	0	2	3	3	3	1	0	3	2	1	2	1	3	1	0	Q9H2A2;Q9H2A2-4	Q9H2A2;Q9H2A2-4	Homo sapiens	AL8A1_HUMAN	2-aminomuconic semialdehyde dehydrogenase;Isoform of Q9H2A2, Isoform 4 of 2-aminomuconic semialdehyde dehydrogenase	ALDH8A1
42810.4	34424.9	51035.6	44052.8	35488.5	41993.7	54793.4	43603.3	36672.5	36047.9	37233.5	29688.4	42499.4	45377.9	33773.6	54346.9	52327.9	40701.7	16	15	18	18	14	15	14	16	16	17	14	13	17	8	18	13	16	15	P49189	P49189	Homo sapiens	AL9A1_HUMAN	4-trimethylaminobutyraldehyde dehydrogenase	ALDH9A1
632799	692820	772427	630878	556109	763341	545830	521477	553782	521242	664202	540608	569146	578142	527915	776541	710894	592348	52	49	55	54	50	52	47	53	55	53	43	48	51	40	51	43	51	49	P04075	P04075	Homo sapiens	ALDOA_HUMAN	Fructose-bisphosphate aldolase A	ALDOA
77519.6	83220	59083.7	60467	57257.6	105018	85277.5	60468.4	54806.1	46885.4	89621.2	49321.1	57957.5	78295.4	50359.1	98509.3	66753.3	64049.4	11	11	11	10	11	11	11	10	8	10	10	11	10	7	9	10	11	10	A8MVZ9;J3KSV6;J3QKP5	A8MVZ9;J3KSV6;J3QKP5	Homo sapiens	A8MVZ9_HUMAN;J3KSV6_HUMAN;J3QKP5_HUMAN	Isoform of P09972, Fructose-bisphosphate aldolase;Isoform of P09972, fructose-bisphosphate aldolase (Fragment);Isoform of P09972, fructose-bisphosphate aldolase (Fragment)	ALDOC
13380	11802.7	11104.5	10508.2	12524.8	12092.7	12660.1	8094.97	12904.7	14126.1	11512.2	11651.9	10636.2	11646.9	13111.9	14136.8	5679.81	10717.1	5	5	5	5	5	5	5	4	5	5	5	5	4	3	5	4	4	5	A0A804HJL6;A0A804HKK4;A0A804HKX7;A0A804HLB7;Q9BT22	A0A804HJL6;A0A804HKK4;A0A804HKX7;A0A804HLB7;Q9BT22	Homo sapiens	A0A804HJL6_HUMAN;A0A804HKK4_HUMAN;A0A804HKX7_HUMAN;A0A804HLB7_HUMAN;ALG1_HUMAN	Isoform of Q9BT22, ALG1 chitobiosyldiphosphodolichol beta-mannosyltransferase;Isoform of Q9BT22, ALG1 chitobiosyldiphosphodolichol beta-mannosyltransferase;Isoform of Q9BT22, ALG1 chitobiosyldiphosphodolichol beta-mannosyltransferase;Isoform of Q9BT22, ALG1 chitobiosyldiphosphodolichol beta-mannosyltransferase;Chitobiosyldiphosphodolichol beta-mannosyltransferase	ALG1
4156.99	3693.25	3613.04	3496.19	4165.87	4109.51	4848.95	2757.7	3407.23	3359.91	3266.65	3770.43	2661.75	2854.05	3284.28	2443.35	3747.14	2643.66	3	3	3	3	3	3	3	3	3	2	2	3	2	1	3	2	3	3	A0A3B3IS90;A0A7P0T8Y4;Q2TAA5	A0A3B3IS90;A0A7P0T8Y4;Q2TAA5	Homo sapiens	A0A3B3IS90_HUMAN;A0A7P0T8Y4_HUMAN;ALG11_HUMAN	Isoform of Q2TAA5, GDP-Man:Man(3)GlcNAc(2)-PP-Dol alpha-1,2-mannosyltransferase;Isoform of Q2TAA5, GDP-Man:Man(3)GlcNAc(2)-PP-Dol alpha-1,2-mannosyltransferase;GDP-Man:Man(3)GlcNAc(2)-PP-Dol alpha-1,2-mannosyltransferase	ALG11
1584.43	NaN	1863.97	1354.05	NaN	2919.88	1492.25	NaN	NaN	1799.26	1249.22	2427.27	2194.8	NaN	1991.83	NaN	1451.57	2191.09	1	0	1	1	0	1	1	0	0	1	1	1	1	0	1	0	1	1	A0A087WTT9;A0A087WX43;A0A096LNJ4;A0A096LNL2;A0A096LP10;A0A096LPI3;A0A1B0GVW6;D6RE84;Q9NP73;Q9NP73-2	A0A087WTT9;A0A087WX43;A0A096LNJ4;A0A096LNL2;A0A096LP10;A0A096LPI3;A0A1B0GVW6;D6RE84;Q9NP73;Q9NP73-2	Homo sapiens	A0A087WTT9_HUMAN;A0A087WX43_HUMAN;A0A096LNJ4_HUMAN;A0A096LNL2_HUMAN;A0A096LP10_HUMAN;A0A096LPI3_HUMAN;A0A1B0GVW6_HUMAN;D6RE84_HUMAN;ALG13_HUMAN;ALG13_HUMAN	Isoform of Q9NP73, N-acetylglucosaminyldiphosphodolichol N-acetylglucosaminyltransferase;Isoform of Q9NP73, N-acetylglucosaminyldiphosphodolichol N-acetylglucosaminyltransferase;Isoform of Q9NP73, N-acetylglucosaminyldiphosphodolichol N-acetylglucosaminyltransferase;Isoform of Q9NP73, N-acetylglucosaminyldiphosphodolichol N-acetylglucosaminyltransferase;Isoform of Q9NP73, N-acetylglucosaminyldiph…	ALG13
13134.7	12429.3	10556.7	10305.3	13034.5	13038.7	13307.4	7633.26	13139.3	9164.43	11303.8	13240.2	10281.6	21852.6	10267.5	15042.3	9808.79	13404.1	4	5	5	5	5	5	4	3	4	5	4	5	4	3	4	3	4	5	Q9H553	Q9H553	Homo sapiens	ALG2_HUMAN	Alpha-1,3/1,6-mannosyltransferase ALG2	ALG2
9741.95	9597.56	9520.35	9487.12	12340.4	8754.81	9775.42	6307.86	9867.74	10426.5	7222.33	10135.7	7101	10482	9029.29	9594.96	8595.86	10944.2	4	3	5	4	4	4	3	3	3	4	4	5	4	1	5	2	3	4	A0A7P0T850;A0A7P0T901;A0A7P0T9B8;A0A7P0T9X2;A0A7P0TAL2;A0A7P0TB27;A0A7P0Z4I2;B4DR67;Q9Y673	A0A7P0T850;A0A7P0T901;A0A7P0T9B8;A0A7P0T9X2;A0A7P0TAL2;A0A7P0TB27;A0A7P0Z4I2;B4DR67;Q9Y673	Homo sapiens	A0A7P0T850_HUMAN;A0A7P0T901_HUMAN;A0A7P0T9B8_HUMAN;A0A7P0T9X2_HUMAN;A0A7P0TAL2_HUMAN;A0A7P0TB27_HUMAN;A0A7P0Z4I2_HUMAN;B4DR67_HUMAN;ALG5_HUMAN	Isoform of Q9Y673, ALG5 dolichyl-phosphate beta-glucosyltransferase;Isoform of Q9Y673, dolichyl-phosphate beta-glucosyltransferase;Isoform of Q9Y673, dolichyl-phosphate beta-glucosyltransferase;Isoform of Q9Y673, ALG5 dolichyl-phosphate beta-glucosyltransferase;Isoform of Q9Y673, dolichyl-phosphate beta-glucosyltransferase;Isoform of Q9Y673, dolichyl-phosphate beta-glucosyltransferase;Isoform of …	ALG5
NaN	NaN	NaN	NaN	NaN	NaN	NaN	NaN	NaN	NaN	NaN	245.249	NaN	NaN	891.31	NaN	NaN	NaN	0	0	0	0	0	0	0	0	0	0	0	1	0	0	1	0	0	0	A0A3B3IS62;A0A3B3ITD6;A0A3B3ITI5;Q9Y672;S4R350	A0A3B3IS62;A0A3B3ITD6;A0A3B3ITI5;Q9Y672;S4R350	Homo sapiens	A0A3B3IS62_HUMAN;A0A3B3ITD6_HUMAN;A0A3B3ITI5_HUMAN;ALG6_HUMAN;S4R350_HUMAN	Isoform of Q9Y672, Alpha-1,3-glucosyltransferase;Isoform of Q9Y672, Alpha-1,3-glucosyltransferase;Isoform of Q9Y672, Alpha-1,3-glucosyltransferase;Dolichyl pyrophosphate Man9GlcNAc2 alpha-1,3-glucosyltransferase;Isoform of Q9Y672, Alpha-1,3-glucosyltransferase	ALG6
4812.6	5457.47	4679.21	4587.98	2646.86	4704.89	6991.01	2633.96	5521.27	6858.86	3602.09	4023.21	5226.18	5649.91	4362.53	2589.43	5175.17	3572.06	2	2	3	3	3	3	3	3	3	4	2	4	2	1	3	1	1	2	A0A087WZ62;Q9H6U8;Q9H6U8-3	A0A087WZ62;Q9H6U8;Q9H6U8-3	Homo sapiens	A0A087WZ62_HUMAN;ALG9_HUMAN;ALG9_HUMAN	readthrough, Mannosyltransferase;Alpha-1,2-mannosyltransferase ALG9;Isoform of Q9H6U8, Isoform 3 of Alpha-1,2-mannosyltransferase ALG9	ALG9
NaN	2126.59	1944.73	3124.18	635.517	2508.3	1132.57	1248.01	2267.02	1553.19	2513.26	1940.14	1982.66	3030.59	NaN	NaN	NaN	2553.16	0	2	2	2	2	2	1	1	1	2	1	2	2	1	0	0	0	1	Q6P6C2;Q6P6C2-1	Q6P6C2;Q6P6C2-1	Homo sapiens	ALKB5_HUMAN	RNA demethylase ALKBH5;Isoform of Q6P6C2, Isoform 1 of RNA demethylase ALKBH5	ALKBH5
35757.1	28738.5	34787	38526.6	39024.2	28538.7	28140.4	34847.6	37987.9	37376.9	23988.1	41350.1	37205.5	48420.8	36096.1	19232.4	16797.5	35829.1	10	10	10	10	9	10	9	10	10	10	10	10	10	8	10	7	9	10	E9PB61;Q86V81	E9PB61;Q86V81	Homo sapiens	E9PB61_HUMAN;THOC4_HUMAN	Isoform of Q86V81, Aly/REF export factor;THO complex subunit 4	ALYREF
7578	7463.31	7090.19	10904.1	9993.43	10461.6	9202.16	5663.7	7603.09	8927.31	12517	5978.58	5835.11	8510.95	5953.38	16452.3	6153.22	7188.08	7	5	7	8	8	7	6	4	7	7	6	7	6	5	5	7	7	5	A0A3B3IU33;Q9Y303;Q9Y303-2;Q9Y303-3	A0A3B3IU33;Q9Y303;Q9Y303-2;Q9Y303-3	Homo sapiens	A0A3B3IU33_HUMAN;NAGA_HUMAN;NAGA_HUMAN;NAGA_HUMAN	Isoform of Q9Y303, N-acetylglucosamine-6-phosphate deacetylase;N-acetylglucosamine-6-phosphate deacetylase;Isoform of Q9Y303, Isoform 2 of N-acetylglucosamine-6-phosphate deacetylase;Isoform of Q9Y303, Isoform 3 of N-acetylglucosamine-6-phosphate deacetylase	AMDHD2
3721.54	2413.3	2862.9	3144.12	4184.22	3160.51	3849.36	2932.1	4435.45	3550.8	2988.41	4078.76	3266.74	4088.52	3763.09	NaN	3118.75	3656.17	2	2	2	3	2	2	1	3	2	3	1	3	3	1	3	0	3	1	Q9UKV5	Q9UKV5	Homo sapiens	AMFR_HUMAN	E3 ubiquitin-protein ligase AMFR	AMFR
NaN	NaN	NaN	NaN	NaN	704.794	2116.15	NaN	NaN	NaN	5639.09	NaN	NaN	NaN	NaN	8495.28	NaN	NaN	0	0	0	0	0	1	1	0	0	0	1	0	0	0	0	1	0	0	P03971	P03971	Homo sapiens	MIS_HUMAN	Muellerian-inhibiting factor	AMH
NaN	NaN	551.267	187.37	NaN	509.942	NaN	NaN	NaN	NaN	NaN	NaN	503.93	NaN	785.173	NaN	NaN	554.012	0	0	1	1	0	1	0	0	0	0	0	0	1	0	1	0	0	1	Q9Y2J4;Q9Y2J4-2;Q9Y2J4-3;Q9Y2J4-4	Q9Y2J4;Q9Y2J4-2;Q9Y2J4-3;Q9Y2J4-4	Homo sapiens	AMOL2_HUMAN	Angiomotin-like protein 2;Isoform of Q9Y2J4, Isoform 2 of Angiomotin-like protein 2;Isoform of Q9Y2J4, Isoform 3 of Angiomotin-like protein 2;Isoform of Q9Y2J4, Isoform 4 of Angiomotin-like protein 2	AMOTL2
30159.2	33625.7	28140.3	28993.8	26998.6	31693.5	30357.1	32526.7	26941.8	28612.5	37109.8	35121	18240.8	30748.1	29516.1	30416.5	46649.5	28811.2	15	14	15	15	14	15	14	13	13	16	13	15	15	11	16	11	15	15	A0A5F9UK94;H0Y360;Q01433	A0A5F9UK94;H0Y360;Q01433	Homo sapiens	A0A5F9UK94_HUMAN;H0Y360_HUMAN;AMPD2_HUMAN	Isoform of Q01433, AMP deaminase;Isoform of Q01433, AMP deaminase;AMP deaminase 2	AMPD2
NaN	NaN	94.8598	43.4088	NaN	NaN	NaN	NaN	NaN	NaN	NaN	NaN	NaN	NaN	NaN	NaN	106.68	NaN	0	0	1	1	0	0	0	0	0	0	0	0	0	0	0	0	1	0	E9PKC5;Q01432;Q01432-3;Q01432-4;Q01432-5;Q01432-6	E9PKC5;Q01432;Q01432-3;Q01432-4;Q01432-5;Q01432-6	Homo sapiens	E9PKC5_HUMAN;AMPD3_HUMAN;AMPD3_HUMAN;AMPD3_HUMAN;AMPD3_HUMAN;AMPD3_HUMAN	Isoform of Q01432, AMP deaminase;AMP deaminase 3;Isoform of Q01432, Isoform 1C of AMP deaminase 3;Isoform of Q01432, Isoform 2 of AMP deaminase 3;Isoform of Q01432, Isoform 3 of AMP deaminase 3;Isoform of Q01432, Isoform 4 of AMP deaminase 3	AMPD3
4367.58	3756.67	3849.47	3114.63	4068.83	6046.95	4164.35	6645.94	3975.1	6049.41	5269.85	5139.72	3661.04	4691.21	5875.67	7078.9	7988.89	3322.47	4	2	3	3	3	5	2	5	3	5	3	5	4	1	4	3	5	4	P49418;P49418-2	P49418;P49418-2	Homo sapiens	AMPH_HUMAN	Amphiphysin;Isoform of P49418, Isoform 2 of Amphiphysin	AMPH
NaN	NaN	NaN	NaN	NaN	1230.66	NaN	NaN	NaN	NaN	6894.32	NaN	2467.6	9354.45	NaN	3436.78	NaN	3006.84	0	0	0	0	0	2	0	0	0	0	1	0	1	2	0	2	0	1	P04746;P0DTE7;P0DTE8;P0DUB6;P19961;P19961-2	P04746;P0DTE7;P0DTE8;P0DUB6;P19961;P19961-2	Homo sapiens	AMYP_HUMAN;AMY1B_HUMAN;AMY1C_HUMAN;AMY1A_HUMAN;AMY2B_HUMAN;AMY2B_HUMAN	Pancreatic alpha-amylase;Alpha-amylase 1B;Alpha-amylase 1C;Alpha-amylase 1A;Alpha-amylase 2B;Isoform of P19961, Isoform 2 of Alpha-amylase 2B	AMY2A
1645.71	964.268	2571.09	2757.11	2246.44	1064.2	NaN	2159.8	2836.03	1554.63	1568.09	2159.64	1265.09	NaN	2172.57	NaN	731.659	820.841	1	1	3	3	2	3	0	1	1	3	1	3	3	0	3	0	2	2	Q9H1A4	Q9H1A4	Homo sapiens	APC1_HUMAN	Anaphase-promoting complex subunit 1	ANAPC1
4022.48	2207.54	2383.96	2113.55	4436.54	2598.57	NaN	4392.35	3360.81	3461.96	NaN	3764.97	2608.11	2959.3	3393.27	NaN	4487.94	3054.07	1	2	2	2	2	2	0	2	2	2	0	2	2	2	2	0	1	2	Q9UJX5;Q9UJX5-2;Q9UJX5-3	Q9UJX5;Q9UJX5-2;Q9UJX5-3	Homo sapiens	APC4_HUMAN	Anaphase-promoting complex subunit 4;Isoform of Q9UJX5, Isoform 2 of Anaphase-promoting complex subunit 4;Isoform of Q9UJX5, Isoform 3 of Anaphase-promoting complex subunit 4	ANAPC4
218.956	NaN	1016.93	552.918	531.773	NaN	NaN	802.908	355.282	500.984	NaN	NaN	546.119	NaN	566.793	NaN	NaN	632.806	1	0	1	1	1	0	0	1	1	1	0	0	1	0	1	0	0	1	F5GY68;F5H0F9;H0YFB5;Q9UJX4;Q9UJX4-2;Q9UJX4-3	F5GY68;F5H0F9;H0YFB5;Q9UJX4;Q9UJX4-2;Q9UJX4-3	Homo sapiens	F5GY68_HUMAN;F5H0F9_HUMAN;H0YFB5_HUMAN;APC5_HUMAN;APC5_HUMAN;APC5_HUMAN	Isoform of Q9UJX4, Anaphase-promoting complex subunit 5 (Fragment);Isoform of Q9UJX4, Anaphase-promoting complex subunit 5;Isoform of Q9UJX4, Anaphase-promoting complex subunit 5 (Fragment);Anaphase-promoting complex subunit 5;Isoform of Q9UJX4, Isoform 2 of Anaphase-promoting complex subunit 5;Isoform of Q9UJX4, Isoform 3 of Anaphase-promoting complex subunit 5	ANAPC5
7203.14	6148.77	6282.84	7701.04	7770.48	5875.83	3365.75	5678.97	5909.07	7068.93	5408.83	6779.02	5248.65	5508.3	5625.45	1880.77	2886.8	8109.28	3	4	5	5	5	5	2	5	4	5	3	4	4	3	4	2	4	3	Q9UJX3;Q9UJX3-2	Q9UJX3;Q9UJX3-2	Homo sapiens	APC7_HUMAN	Anaphase-promoting complex subunit 7;Isoform of Q9UJX3, Isoform 2 of Anaphase-promoting complex subunit 7	ANAPC7
NaN	NaN	NaN	NaN	NaN	NaN	1231.41	2533.67	582.457	NaN	3772.35	1593.95	NaN	NaN	NaN	NaN	14466.9	NaN	0	0	0	0	0	0	1	4	2	0	5	4	0	0	0	0	6	0	Q15389;Q15389-2	Q15389;Q15389-2	Homo sapiens	ANGP1_HUMAN	Angiopoietin-1;Isoform of Q15389, Isoform 2 of Angiopoietin-1	ANGPT1
3560.93	NaN	5343.91	2223.04	3888.86	7295.15	NaN	NaN	NaN	7925.73	NaN	NaN	23919.1	NaN	NaN	NaN	13314.8	NaN	1	0	1	1	1	1	0	0	0	1	0	0	1	0	0	0	1	0	Q9UKU9	Q9UKU9	Homo sapiens	ANGL2_HUMAN	Angiopoietin-related protein 2	ANGPTL2
1387.09	3183.19	2248.82	750.662	944.044	1722.8	2765.8	NaN	1316.07	415.341	2121.61	625.731	1178.64	NaN	409.182	1021.47	157.049	228.278	3	5	5	2	4	4	4	0	3	1	4	3	1	0	2	1	1	1	Q9BY76;Q9BY76-2	Q9BY76;Q9BY76-2	Homo sapiens	ANGL4_HUMAN	Angiopoietin-related protein 4;Isoform of Q9BY76, Isoform 2 of Angiopoietin-related protein 4	ANGPTL4
7031.34	1754.69	4968.9	4654.01	700.112	2588.5	4120.07	NaN	NaN	2736.41	28771	NaN	3539.28	NaN	NaN	36135.1	3809.69	2256.42	2	2	1	1	2	1	2	0	0	1	1	0	1	0	0	1	2	1	A0A5F9ZGS5;A0A5F9ZGS7;A0A5F9ZGX3;A0A5F9ZGX8;A0A5F9ZGY1;A0A5F9ZGY3;A0A5F9ZGY4;A0A5F9ZGZ1;A0A5F9ZGZ5;A0A5F9ZH19;A0A5F9ZH30;A0A5F9ZH34;A0A5F9ZH35;A0A5F9ZH38;A0A5F9ZH39;A0A5F9ZH58;A0A5F9ZH70;A0A5F9ZHA1;A0A5F9ZHC9;A0A5F9ZHD2;A0A5F9ZHE4;A0A5F9ZHG3;A0A5F9ZHJ4;A0A5F9ZHJ6;A0A5F9ZHL5;A0A5F9ZHL9;A0A5F9ZHN5;A0A5F9ZHQ5;A0A5F9ZHR2;A0A5F9ZHR8;A0A5F9ZHS1;A0A5F9ZHY6;A0A5F9ZI15;A0A5F9ZI18;A0A5F9ZI30;A0A5F9ZI40;A0A…	A0A5F9ZGS5;A0A5F9ZGS7;A0A5F9ZGX3;A0A5F9ZGX8;A0A5F9ZGY1;A0A5F9ZGY3;A0A5F9ZGY4;A0A5F9ZGZ1;A0A5F9ZGZ5;A0A5F9ZH19;A0A5F9ZH30;A0A5F9ZH34;A0A5F9ZH35;A0A5F9ZH38;A0A5F9ZH39;A0A5F9ZH58;A0A5F9ZH70;A0A5F9ZHA1;A0A5F9ZHC9;A0A5F9ZHD2;A0A5F9ZHE4;A0A5F9ZHG3;A0A5F9ZHJ4;A0A5F9ZHJ6;A0A5F9ZHL5;A0A5F9ZHL9;A0A5F9ZHN5;A0A5F9ZHQ5;A0A5F9ZHR2;A0A5F9ZHR8;A0A5F9ZHS1;A0A5F9ZHY6;A0A5F9ZI15;A0A5F9ZI18;A0A5F9ZI30;A0A5F9ZI40;A0A…	Homo sapiens	A0A5F9ZGS5_HUMAN;A0A5F9ZGS7_HUMAN;A0A5F9ZGX3_HUMAN;A0A5F9ZGX8_HUMAN;A0A5F9ZGY1_HUMAN;A0A5F9ZGY3_HUMAN;A0A5F9ZGY4_HUMAN;A0A5F9ZGZ1_HUMAN;A0A5F9ZGZ5_HUMAN;A0A5F9ZH19_HUMAN;A0A5F9ZH30_HUMAN;A0A5F9ZH34_HUMAN;A0A5F9ZH35_HUMAN;A0A5F9ZH38_HUMAN;A0A5F9ZH39_HUMAN;A0A5F9ZH58_HUMAN;A0A5F9ZH70_HUMAN;A0A5F9ZHA1_HUMAN;A0A5F9ZHC9_HUMAN;A0A5F9ZHD2_HUMAN;A0A5F9ZHE4_HUMAN;A0A5F9ZHG3_HUMAN;A0A5F9ZHJ4_HUMAN;A0A5F9ZH…	Isoform of Q01484, Ankyrin 2;Isoform of Q01484, Ankyrin 2;Isoform of Q01484, Ankyrin 2;Isoform of Q01484, Ankyrin 2;Isoform of Q01484, Ankyrin 2;Isoform of Q01484, Ankyrin 2;Isoform of Q01484, Ankyrin 2;Isoform of Q01484, Ankyrin 2;Isoform of Q01484, Ankyrin 2 (Fragment);Isoform of Q01484, Ankyrin 2;Isoform of Q01484, Ankyrin 2;Isoform of Q01484, Ankyrin 2;Isoform of Q01484, Ankyrin 2;Isoform of …	ANK2
4596.74	NaN	4345.73	2424.17	3517.43	NaN	2475.47	1730.27	NaN	2615.06	NaN	NaN	NaN	NaN	NaN	NaN	4342.71	NaN	1	0	15	4	1	0	1	1	0	2	0	0	0	0	0	0	2	0	H0Y9E9;Q12955;Q12955-4;Q12955-5	H0Y9E9;Q12955;Q12955-4;Q12955-5	Homo sapiens	H0Y9E9_HUMAN;ANK3_HUMAN;ANK3_HUMAN;ANK3_HUMAN	Isoform of Q12955, Ankyrin 3;Ankyrin-3;Isoform of Q12955, Isoform 2 of Ankyrin-3;Isoform of Q12955, Isoform 3 of Ankyrin-3	ANK3
8302.16	9885.44	7009.89	8789.46	9533.66	9560.05	9250.29	9869.52	9009.81	9166.65	8792.44	7614.42	10088.5	8983.67	9204.51	12551.7	10735.8	8387.21	13	9	14	15	13	13	11	15	13	15	11	13	15	6	11	9	12	10	Q9P2R3;Q9P2R3-4	Q9P2R3;Q9P2R3-4	Homo sapiens	ANFY1_HUMAN	Rabankyrin-5;Isoform of Q9P2R3, Isoform 4 of Rabankyrin-5	ANKFY1
NaN	3547.41	4616.48	1273.91	1204.96	1185.59	1598.81	NaN	NaN	967.21	NaN	NaN	NaN	NaN	2298.55	NaN	NaN	4395.35	0	1	3	3	2	1	1	0	0	1	0	0	0	0	3	0	0	1	Q9HCJ1	Q9HCJ1	Homo sapiens	ANKH_HUMAN	Progressive ankylosis protein homolog	ANKH
5393.75	5205.27	4640.45	4415.76	4821.3	5125.89	3334.51	4794.16	3944.23	4560.11	4122.46	3517.71	4724.16	1097.09	2946.39	2392.63	2977.81	3709.5	3	3	2	3	2	2	2	3	3	3	2	2	3	1	2	2	2	2	Q8IWZ3;Q8IWZ3-4;Q8IWZ3-6	Q8IWZ3;Q8IWZ3-4;Q8IWZ3-6	Homo sapiens	ANKH1_HUMAN	Ankyrin repeat and KH domain-containing protein 1;Isoform of Q8IWZ3, Isoform 4 of Ankyrin repeat and KH domain-containing protein 1;Isoform of Q8IWZ3, Isoform 6 of Ankyrin repeat and KH domain-containing protein 1	ANKHD1
3442.59	1064.2	1427.36	1998.74	646.486	2404.56	774.484	1066.24	NaN	657.374	NaN	NaN	NaN	NaN	NaN	1784.74	1268	NaN	1	1	1	1	1	1	1	1	0	1	0	0	0	0	0	1	1	0	Q9P2G1	Q9P2G1	Homo sapiens	AKIB1_HUMAN	Ankyrin repeat and IBR domain-containing protein 1	ANKIB1
4354.58	4518.58	3689.47	4190.76	4496.79	4648.28	5175.35	4972.58	5392.92	4747.91	5381.06	3948.2	3960.74	6817.46	4681.92	3867.84	2507.75	5399.97	9	9	10	12	10	11	9	10	9	11	5	10	11	3	13	4	4	10	Q86XL3	Q86XL3	Homo sapiens	ANKL2_HUMAN	Ankyrin repeat and LEM domain-containing protein 2	ANKLE2
2623.4	2392.28	2523.78	2704.81	2504.56	2497.9	1532.54	3813.94	3386.72	3500.19	2665.93	2860.65	3774.56	3097.13	3394.81	831.324	3587.97	2293.96	3	3	3	3	3	2	3	3	2	3	3	3	3	1	3	1	3	3	G3V0G5;Q8IV38	G3V0G5;Q8IV38	Homo sapiens	G3V0G5_HUMAN;ANKY2_HUMAN	Isoform of Q8IV38, Ankyrin repeat and MYND domain containing 2;Ankyrin repeat and MYND domain-containing protein 2	ANKMY2
5357.5	6740.1	5242.02	6013.22	6291.17	8918.59	6333.72	9163.31	7929.84	8630.78	6711.13	7163.24	8917.64	7588.26	8180.58	5092.97	9071.95	6744.35	9	10	13	11	12	12	10	12	12	12	9	13	12	8	14	8	13	9	Q8IZ07	Q8IZ07	Homo sapiens	AN13A_HUMAN	Ankyrin repeat domain-containing protein 13A	ANKRD13A
8800.17	9167	8822.23	8508.44	10217.1	9024.46	8487.52	9025.63	9409.54	9072.77	9262.76	10049.1	7739.92	8390.13	8078.87	6588.53	6830.67	9461.81	12	12	12	12	12	12	10	11	10	12	8	12	12	7	12	5	11	11	H0YM23;O75179;O75179-2;O75179-7	H0YM23;O75179;O75179-2;O75179-7	Homo sapiens	H0YM23_HUMAN;ANR17_HUMAN;ANR17_HUMAN;ANR17_HUMAN	Isoform of O75179, Ankyrin repeat domain 17 (Fragment);Ankyrin repeat domain-containing protein 17;Isoform of O75179, Isoform 2 of Ankyrin repeat domain-containing protein 17;Isoform of O75179, Isoform 7 of Ankyrin repeat domain-containing protein 17	ANKRD17
7387.14	4373.36	4409.1	4588.76	7998.38	2407.29	3900.8	4656.8	4083.16	2882.63	4401.13	2284.97	4906.02	NaN	5434.7	4285.82	4217.4	934.046	3	2	4	4	3	2	2	2	2	3	2	3	4	0	3	3	3	2	O15084;O15084-1;O15084-2;O15084-4	O15084;O15084-1;O15084-2;O15084-4	Homo sapiens	ANR28_HUMAN	Serine/threonine-protein phosphatase 6 regulatory ankyrin repeat subunit A;Isoform of O15084, Isoform 3 of Serine/threonine-protein phosphatase 6 regulatory ankyrin repeat subunit A;Isoform of O15084, Isoform 2 of Serine/threonine-protein phosphatase 6 regulatory ankyrin repeat subunit A;Isoform of O15084, Isoform 4 of Serine/threonine-protein phosphatase 6 regulatory ankyrin repeat subunit A	ANKRD28
1005.06	1246.39	903.542	878.499	NaN	1239.67	1209.36	917.762	NaN	1103.6	528.057	1283.71	NaN	NaN	735.149	NaN	971.671	1041.02	1	1	2	2	0	2	2	1	0	2	1	1	0	0	2	0	1	2	Q8NB46	Q8NB46	Homo sapiens	ANR52_HUMAN	Serine/threonine-protein phosphatase 6 regulatory ankyrin repeat subunit C	ANKRD52
29692.5	25211.8	78916.4	28213.7	31026.7	25057	19415.9	15904.5	19970.1	21276.3	22130.8	20668.9	29442.2	11477.5	13102.1	15433.4	11411.7	14758.1	2	2	2	2	2	2	2	2	2	2	2	2	2	2	2	2	2	2	A0A804HKX1;F8VR14;H0YI72;Q7Z6G8;Q7Z6G8-10;Q7Z6G8-2;Q7Z6G8-3;Q7Z6G8-4;Q7Z6G8-5;Q7Z6G8-6;Q7Z6G8-7;Q7Z6G8-8;Q7Z6G8-9;R4GN78	A0A804HKX1;F8VR14;H0YI72;Q7Z6G8;Q7Z6G8-10;Q7Z6G8-2;Q7Z6G8-3;Q7Z6G8-4;Q7Z6G8-5;Q7Z6G8-6;Q7Z6G8-7;Q7Z6G8-8;Q7Z6G8-9;R4GN78	Homo sapiens	A0A804HKX1_HUMAN;F8VR14_HUMAN;H0YI72_HUMAN;ANS1B_HUMAN;ANS1B_HUMAN;ANS1B_HUMAN;ANS1B_HUMAN;ANS1B_HUMAN;ANS1B_HUMAN;ANS1B_HUMAN;ANS1B_HUMAN;ANS1B_HUMAN;ANS1B_HUMAN;R4GN78_HUMAN	Isoform of Q7Z6G8, Ankyrin repeat and sterile alpha motif domain containing 1B;Isoform of Q7Z6G8, Ankyrin repeat and sterile alpha motif domain containing 1B;Isoform of Q7Z6G8, Ankyrin repeat and sterile alpha motif domain containing 1B (Fragment);Ankyrin repeat and sterile alpha motif domain-containing protein 1B;Isoform of Q7Z6G8, Isoform 10 of Ankyrin repeat and sterile alpha motif domain-cont…	ANKS1B
5003	3024.24	3872.42	4447.11	3899.35	5042.02	4277.65	2461.83	3535.76	4097.03	3289.74	2464.49	2995.1	NaN	3834.22	1454.35	2208.5	2157.29	2	2	2	3	1	2	2	2	2	2	2	2	2	0	3	1	1	2	B8ZZS4;Q9H8Y5	B8ZZS4;Q9H8Y5	Homo sapiens	B8ZZS4_HUMAN;ANKZ1_HUMAN	Isoform of Q9H8Y5, Ankyrin repeat and zinc finger peptidyl tRNA hydrolase 1;Ankyrin repeat and zinc finger domain-containing protein 1	ANKZF1
3491.27	2078.25	3562.73	2208.46	6583.45	4559.44	1446.77	5895.65	9808.75	5900.97	4292.19	6489.17	3122.2	6056.48	8779.01	3270.37	NaN	10109	10	8	12	12	15	14	4	15	15	15	9	14	8	7	14	1	0	14	Q9NQW6	Q9NQW6	Homo sapiens	ANLN_HUMAN	Anillin	ANLN
24358.2	30204.6	24310.2	24231.8	23260.5	28488.8	34731.2	22120.2	26904.8	25839.2	33905.3	29714.1	23147.7	21432.4	25121.8	37096.6	34517.7	17175.9	11	10	11	11	11	10	10	9	10	9	9	11	10	7	11	10	11	9	Q9NW15	Q9NW15	Homo sapiens	ANO10_HUMAN	Anoctamin-10	ANO10
6261.42	5804.6	4285.54	7115.66	7472.74	6202.13	7647.7	5378.83	4833.55	5593.93	3335.81	4508.23	5707.73	3148.92	5923.43	2847.14	9897.17	5940.64	7	4	7	8	7	8	4	6	5	8	4	6	8	3	7	2	8	5	A0A7P0TBC5;Q4KMQ2;Q4KMQ2-2;Q4KMQ2-3	A0A7P0TBC5;Q4KMQ2;Q4KMQ2-2;Q4KMQ2-3	Homo sapiens	A0A7P0TBC5_HUMAN;ANO6_HUMAN;ANO6_HUMAN;ANO6_HUMAN	Isoform of Q4KMQ2, Anoctamin;Anoctamin-6;Isoform of Q4KMQ2, Isoform 2 of Anoctamin-6;Isoform of Q4KMQ2, Isoform 3 of Anoctamin-6	ANO6
38990.4	32371.4	30708.1	38021.3	42247.8	30032.6	21790.4	37349	27215.4	37489.4	22659.7	34006	38031	36163.6	32862	28291.6	22129.2	38988.7	8	9	10	12	11	10	7	12	11	12	8	11	12	8	11	9	10	10	P39687	P39687	Homo sapiens	AN32A_HUMAN	Acidic leucine-rich nuclear phosphoprotein 32 family member A	ANP32A
101626	60712.4	88329.9	99015.1	93644.5	51080.6	39931.2	76521.8	62753.9	83136.4	58920.1	67337.7	81819.5	65989.1	62644.9	53543.8	32399.1	80673.8	5	6	8	8	6	6	6	8	7	8	5	6	8	4	8	5	6	8	Q92688;Q92688-2	Q92688;Q92688-2	Homo sapiens	AN32B_HUMAN	Acidic leucine-rich nuclear phosphoprotein 32 family member B;Isoform of Q92688, Isoform 2 of Acidic leucine-rich nuclear phosphoprotein 32 family member B	ANP32B
32475.9	17786.4	25610.4	23948.2	28515.9	17053.3	11036.4	32395.5	27804.7	28322.7	19697.2	23866.8	23578.1	29049.3	21871	14121.1	12670.3	21553.9	4	4	4	5	4	3	3	3	4	5	2	5	5	4	4	2	3	4	Q9BTT0;Q9BTT0-3	Q9BTT0;Q9BTT0-3	Homo sapiens	AN32E_HUMAN	Acidic leucine-rich nuclear phosphoprotein 32 family member E;Isoform of Q9BTT0, Isoform 3 of Acidic leucine-rich nuclear phosphoprotein 32 family member E	ANP32E
228311	199168	159271	206483	198465	151747	303115	128058	115695	113999	232158	238517	248691	191639	137129	320599	181097	145993	56	56	61	65	59	57	59	58	55	61	57	59	61	45	62	51	59	58	P15144	P15144	Homo sapiens	AMPN_HUMAN	Aminopeptidase N	ANPEP
8316.99	8201.86	5275.71	5498.25	7316.11	5478.7	4427.37	8388.37	6070.23	7670.31	11805.6	6758.93	5042.48	9604.86	6642.33	8367.94	11886.9	6071.52	7	7	6	7	6	6	6	7	6	7	7	6	7	5	7	5	7	7	Q9H6X2;Q9H6X2-5	Q9H6X2;Q9H6X2-5	Homo sapiens	ANTR1_HUMAN	Anthrax toxin receptor 1;Isoform of Q9H6X2, Isoform 5 of Anthrax toxin receptor 1	ANTXR1
3584.9	4257.73	4881.95	2673.47	3982.32	3322.58	6343.8	3766.6	2864.28	3327.82	4496.43	5514.62	4448.07	2123.66	3746.38	2454.46	3110.22	6248.65	7	5	8	6	8	6	6	7	4	8	5	6	6	2	7	1	6	7	A0A7P0Z4A8;P58335;P58335-2;P58335-4	A0A7P0Z4A8;P58335;P58335-2;P58335-4	Homo sapiens	A0A7P0Z4A8_HUMAN;ANTR2_HUMAN;ANTR2_HUMAN;ANTR2_HUMAN	Isoform of P58335, Anthrax toxin receptor;Anthrax toxin receptor 2;Isoform of P58335, Isoform 2 of Anthrax toxin receptor 2;Isoform of P58335, Isoform 4 of Anthrax toxin receptor 2	ANTXR2
891004	1114670	995805	1029540	1009890	896841	1042910	999768	864105	807506	984517	1046160	1027190	755772	887350	1402350	1415600	897643	46	46	50	53	48	52	48	49	50	52	47	47	51	37	50	43	52	49	P04083	P04083	Homo sapiens	ANXA1_HUMAN	Annexin A1	ANXA1
59310.7	74488	81841.4	69972.1	67370	58137.4	77501	66542.5	66816.2	53485.2	68149.9	62045.6	87919.3	41377.9	69130.9	78525.9	115361	52569.9	30	30	35	35	31	32	33	34	30	34	30	31	35	22	34	25	34	33	P50995;P50995-2	P50995;P50995-2	Homo sapiens	ANX11_HUMAN	Annexin A11;Isoform of P50995, Isoform 2 of Annexin A11	ANXA11
1876460	2174990	1712910	1825960	1621040	1693170	2495710	1817480	1953330	1937090	2162910	1853170	2072960	1587280	1872440	1712180	3306160	1762990	67	62	74	74	64	65	63	64	66	72	62	67	69	54	65	55	69	63	P07355	P07355	Homo sapiens	ANXA2_HUMAN	Annexin A2	ANXA2
443043	271153	201867	252294	438267	144617	159153	274043	117001	352587	188915	272408	307236	101402	325243	249571	398011	215475	2	2	2	2	2	2	2	2	2	2	2	2	2	2	2	2	2	2	A6NMY6	A6NMY6	Homo sapiens	AXA2L_HUMAN	Putative annexin A2-like protein	ANXA2P2
NaN	NaN	1175.45	NaN	NaN	1363.55	NaN	9.81142	1451.57	NaN	NaN	NaN	213.904	NaN	NaN	1378.81	16.4173	NaN	0	0	2	0	0	1	0	2	1	0	0	0	1	0	0	2	1	0	D6RA82;P12429	D6RA82;P12429	Homo sapiens	D6RA82_HUMAN;ANXA3_HUMAN	Isoform of P12429, Annexin;Annexin A3	ANXA3
34162.5	40495.8	31937.4	39074.7	30072.3	34422	51222.8	28306.4	34576.1	33776.5	49355.7	32692.1	32811.9	30201.9	33180.8	49875.6	62331	32126.2	37	35	38	38	34	36	38	34	35	39	33	37	37	22	37	30	39	37	P09525;P09525-3	P09525;P09525-3	Homo sapiens	ANXA4_HUMAN	Annexin A4;Isoform of P09525, Isoform 3 of Annexin A4	ANXA4
1469410	1539950	1484980	1665650	1410470	1753810	2022290	1233340	1396590	1152830	2518600	1399010	1392860	1046290	1144730	2063000	2541070	1707450	52	50	56	55	50	53	53	51	53	54	47	54	55	42	53	46	57	55	P08758	P08758	Homo sapiens	ANXA5_HUMAN	Annexin A5	ANXA5
453252	478940	477638	486869	405777	512830	573926	550316	505020	471967	548407	451860	486365	516781	484580	479446	956227	480560	86	81	86	88	83	86	84	87	88	85	83	84	87	73	83	75	86	86	A0A0S2Z377	A0A0S2Z377	Homo sapiens	A0A0S2Z377_HUMAN	Isoform of P08133, Annexin (Fragment)	ANXA6
55730	68367.5	60704.5	53465.3	51555.2	48250.1	67233.4	55572.5	57733.8	59995.9	59799.3	55269	70673.8	52634.9	60939.1	59723.9	68898.4	51525.8	17	17	21	21	18	18	15	18	18	20	14	18	20	12	18	13	20	18	P20073;P20073-2	P20073;P20073-2	Homo sapiens	ANXA7_HUMAN	Annexin A7;Isoform of P20073, Isoform 2 of Annexin A7	ANXA7
23458.5	24111.1	23238.6	24060.5	22678.5	27215	26565.5	22123.3	23390.4	22258.7	27517.8	22691.8	24802.1	23725.2	23328.2	28613.6	33050	22775.7	14	12	14	16	13	12	12	13	14	14	12	14	15	8	16	11	14	12	Q10567;Q10567-2;Q10567-3	Q10567;Q10567-2;Q10567-3	Homo sapiens	AP1B1_HUMAN	AP-1 complex subunit beta-1;Isoform of Q10567, Isoform B of AP-1 complex subunit beta-1;Isoform of Q10567, Isoform C of AP-1 complex subunit beta-1	AP1B1
13181.1	15289.2	14368.6	12799.4	13052.4	13992.8	12866.8	13188	12062.7	12408	11604.3	12671.6	13028.6	11372.8	14401.8	11820.3	12993.5	11885.3	17	14	19	19	17	16	15	16	14	19	11	19	17	12	17	10	16	17	O43747;O43747-2	O43747;O43747-2	Homo sapiens	AP1G1_HUMAN	AP-1 complex subunit gamma-1;Isoform of O43747, Isoform 2 of AP-1 complex subunit gamma-1	AP1G1
24907	32529.1	26999.1	27066.1	26513.7	32097.1	31354	27008.7	29788.5	29004.4	31389.8	27049	30104.6	28194	30936.6	26145.6	32436	26700.3	18	19	20	21	19	18	19	19	19	20	18	21	20	13	21	18	19	19	Q9BXS5;Q9BXS5-2	Q9BXS5;Q9BXS5-2	Homo sapiens	AP1M1_HUMAN	AP-1 complex subunit mu-1;Isoform of Q9BXS5, Isoform 2 of AP-1 complex subunit mu-1	AP1M1
15573.9	12724.1	12686.2	12556.8	10997.8	13849.7	12004.1	12917.8	16096.3	13392.4	9091.94	12178.4	14875.2	8461.87	13254.3	8348.16	17587.2	7036.36	3	3	4	4	3	3	4	4	3	4	3	4	3	2	4	2	3	3	A0A2R8YGH5;H7C1E4;P61966	A0A2R8YGH5;H7C1E4;P61966	Homo sapiens	A0A2R8YGH5_HUMAN;H7C1E4_HUMAN;AP1S1_HUMAN	Isoform of P61966, AP complex subunit sigma;Isoform of P61966, Adaptor related protein complex 1 subunit sigma 1 (Fragment);AP-1 complex subunit sigma-1A	AP1S1
5762.5	10002	7738.21	7576.63	6314.98	6603.65	6467.2	6103.14	4674.58	7081.2	6804.13	6653.18	5465.93	4848.73	6351.34	4343.19	2282.87	11250.8	2	3	4	4	3	3	3	3	3	4	2	4	3	2	4	1	1	3	P56377	P56377	Homo sapiens	AP1S2_HUMAN	AP-1 complex subunit sigma-2	AP1S2
64816.9	64532	57751.5	51645.3	53817.6	52872.6	64970.2	62377.2	61586.8	49462.7	66812.4	47842.7	51544.4	46948.1	50717.6	62375.1	100244	53437	30	29	32	35	29	30	29	33	33	34	27	29	32	27	32	26	32	32	O95782;O95782-2	O95782;O95782-2	Homo sapiens	AP2A1_HUMAN	AP-2 complex subunit alpha-1;Isoform of O95782, Isoform B of AP-2 complex subunit alpha-1	AP2A1
25044.5	25180.5	22018.9	22081.5	22267.4	24650.7	24166	23871.5	19326.5	19452.7	24156	21411.2	19974.7	18940.9	20123.5	22528.6	34849.3	22190.9	29	30	32	34	30	33	28	29	31	33	27	30	32	21	30	26	32	30	O94973;O94973-2	O94973;O94973-2	Homo sapiens	AP2A2_HUMAN	AP-2 complex subunit alpha-2;Isoform of O94973, Isoform 2 of AP-2 complex subunit alpha-2	AP2A2
40835.6	46972.2	38175.7	37016.4	37317.6	38405.5	40267.8	41773.2	38979.2	35381.7	42720	35972.6	37529.9	32563.1	36985.2	40623.8	61271.6	33875.8	47	43	53	54	48	50	44	49	47	52	46	48	53	37	51	41	51	49	P63010;P63010-2	P63010;P63010-2	Homo sapiens	AP2B1_HUMAN	AP-2 complex subunit beta;Isoform of P63010, Isoform 2 of AP-2 complex subunit beta	AP2B1
67436.2	69079.9	53752	52646.2	59637.1	58460.4	73164.6	65271.9	59896.7	49082.3	64456.6	54262.9	53468.6	53362.2	57132.1	65563.6	86910.7	52007.3	18	20	24	21	19	19	20	21	20	22	18	20	22	16	21	16	21	19	A0A087WY71;C9JGT8;C9JPV8;E9PFW3;Q96CW1;Q96CW1-2	A0A087WY71;C9JGT8;C9JPV8;E9PFW3;Q96CW1;Q96CW1-2	Homo sapiens	A0A087WY71_HUMAN;C9JGT8_HUMAN;C9JPV8_HUMAN;E9PFW3_HUMAN;AP2M1_HUMAN;AP2M1_HUMAN	Isoform of Q96CW1, AP-2 complex subunit mu;Isoform of Q96CW1, AP-2 complex subunit mu;Isoform of Q96CW1, AP-2 complex subunit mu;Isoform of Q96CW1, AP-2 complex subunit mu;AP-2 complex subunit mu;Isoform of Q96CW1, Isoform 2 of AP-2 complex subunit mu	AP2M1
19308.5	22516	14082.5	14504.2	17204.4	15299	18229.7	16271	16198.7	12772	17724.5	13635.4	12887.4	17840	14282.1	17406	20405.3	12447.1	4	4	4	4	3	4	3	4	3	4	4	4	4	2	4	3	4	4	M0QYZ2;M0R0N4;P53680	M0QYZ2;M0R0N4;P53680	Homo sapiens	M0QYZ2_HUMAN;M0R0N4_HUMAN;AP2S1_HUMAN	Isoform of P53680, AP complex subunit sigma;Isoform of P53680, AP complex subunit sigma;AP-2 complex subunit sigma	AP2S1
35343.3	36921.5	41323.1	37037.4	32079.3	34546.3	31374.6	35184.7	31159.1	36517.8	32870.1	36425.1	33976.5	32216.4	35176.1	35539.2	41773.8	34110.9	32	30	31	32	30	30	27	31	31	32	26	30	32	24	32	26	32	32	A0A8Q3WKJ9;O00203;O00203-3	A0A8Q3WKJ9;O00203;O00203-3	Homo sapiens	A0A8Q3WKJ9_HUMAN;AP3B1_HUMAN;AP3B1_HUMAN	Isoform of O00203, AP-3 complex subunit beta;AP-3 complex subunit beta-1;Isoform of O00203, Isoform 2 of AP-3 complex subunit beta-1	AP3B1
NaN	22344.6	20807.3	20299.9	NaN	22705.1	8720.53	21314.3	15684.4	NaN	13341.3	16382.2	NaN	NaN	16568.5	NaN	NaN	22527.4	0	1	1	1	0	1	1	1	1	0	1	1	0	0	1	0	0	1	A0A2R8Y2A8;A0A5F9UJV3;Q13367;Q13367-4	A0A2R8Y2A8;A0A5F9UJV3;Q13367;Q13367-4	Homo sapiens	A0A2R8Y2A8_HUMAN;A0A5F9UJV3_HUMAN;AP3B2_HUMAN;AP3B2_HUMAN	Isoform of Q13367, AP-3 complex subunit beta;Isoform of Q13367, AP-3 complex subunit beta;AP-3 complex subunit beta-2;Isoform of Q13367, Isoform 4 of AP-3 complex subunit beta-2	AP3B2
28736.3	26953.5	31976.1	29123.5	28982.3	28376.3	23389.6	25671	25998.5	29546.4	26239.5	26626.7	25723.4	25465.3	25378.3	26176.9	32439.7	28074	27	27	31	31	26	29	25	30	27	32	25	27	29	17	32	18	28	29	A0A8V8TQW4;O14617-5	A0A8V8TQW4;O14617-5	Homo sapiens	A0A8V8TQW4_HUMAN;AP3D1_HUMAN	Isoform of O14617, AP-3 complex subunit delta;Isoform of O14617, Isoform 5 of AP-3 complex subunit delta-1	AP3D1
7286.02	6576.29	6656.79	7038.83	6329.15	5836.89	7262.59	6177.85	6196.09	6835.42	6407.84	5968.34	5861.27	4722.6	6508.79	5841.48	7645.25	6455.06	8	7	9	9	6	8	6	8	7	9	5	7	8	5	9	6	8	7	Q9Y2T2	Q9Y2T2	Homo sapiens	AP3M1_HUMAN	AP-3 complex subunit mu-1	AP3M1
4987.64	4348.01	6111.31	5193.01	4868	4620.04	3443.14	4789.49	3319.58	4375.59	3486.45	3918.39	3489.04	2087.08	4220.51	2920.52	5963.82	4034.8	3	3	4	4	4	4	3	4	4	4	2	3	4	2	4	2	4	4	E5RJ52;P53677	E5RJ52;P53677	Homo sapiens	E5RJ52_HUMAN;AP3M2_HUMAN	Isoform of P53677, Adaptor related protein complex 3 subunit mu 2 (Fragment);AP-3 complex subunit mu-2	AP3M2
35718.7	41874.1	39741.5	33704.3	34989.3	37125.6	30582.9	35557.2	34912.4	34921.9	36285.6	35018.9	29407.8	25779.2	34274.3	36636.6	38626.6	35519.7	7	8	8	8	8	8	8	8	8	8	8	8	8	6	8	6	8	8	Q92572	Q92572	Homo sapiens	AP3S1_HUMAN	AP-3 complex subunit sigma-1	AP3S1
2519.01	802.692	291.653	2657.86	1483.36	1895.39	NaN	2464.95	1663.53	2591.34	1444.48	2108.31	1161.46	NaN	621.712	NaN	1351.31	1153.27	2	2	2	1	2	2	0	1	1	2	1	1	2	0	2	0	2	1	B1ALD0;Q9Y6B7	B1ALD0;Q9Y6B7	Homo sapiens	B1ALD0_HUMAN;AP4B1_HUMAN	Isoform of Q9Y6B7, AP complex subunit beta;AP-4 complex subunit beta-1	AP4B1
1746.41	1501.79	1658.18	1651.8	1065.23	1270.2	NaN	1410.67	631.791	1312.9	673.217	1101.56	1674.63	NaN	1536.91	684.129	1037.93	1787.93	1	1	1	1	1	1	0	1	1	1	1	1	1	0	1	1	1	1	Q9Y587	Q9Y587	Homo sapiens	AP4S1_HUMAN	AP-4 complex subunit sigma-1	AP4S1
1278.17	753.414	1749.35	1895.15	1477.04	1778.95	1755.88	1607.39	1538.71	1841.99	1105.05	NaN	1347.27	NaN	957.713	733.274	999.181	532.521	1	1	1	1	1	1	1	1	1	1	1	0	1	0	1	1	1	1	E7EQ45;Q9H0R1;Q9H0R1-2	E7EQ45;Q9H0R1;Q9H0R1-2	Homo sapiens	E7EQ45_HUMAN;AP5M1_HUMAN;AP5M1_HUMAN	Isoform of Q9H0R1, AP-5 complex subunit mu-1;AP-5 complex subunit mu-1;Isoform of Q9H0R1, Isoform 2 of AP-5 complex subunit mu-1	AP5M1
2858.37	1588.39	2708.01	4442.68	1311.36	3631.12	1807.96	971.536	2979.7	2686.56	NaN	843.569	2934.48	2349.71	2086.19	NaN	2530.41	1172.87	1	1	1	1	1	1	1	1	1	1	0	1	1	1	1	0	1	1	A0A3B3IS81;O43299	A0A3B3IS81;O43299	Homo sapiens	A0A3B3IS81_HUMAN;AP5Z1_HUMAN	Isoform of O43299, Adaptor related protein complex 5 subunit zeta 1 (Fragment);AP-5 complex subunit zeta-1	AP5Z1
1627.77	NaN	1368.47	1955.54	1701.81	1015.29	913.977	2526.05	1434.51	1765.49	NaN	1321.44	1864	NaN	1613.29	NaN	1424.98	1773.41	3	0	4	4	3	2	2	3	2	4	0	2	4	0	2	0	2	4	C9JLV4;O14727;O14727-4;O14727-5;O14727-6	C9JLV4;O14727;O14727-4;O14727-5;O14727-6	Homo sapiens	C9JLV4_HUMAN;APAF_HUMAN;APAF_HUMAN;APAF_HUMAN;APAF_HUMAN	Isoform of O14727, Apoptotic peptidase activating factor 1;Apoptotic protease-activating factor 1;Isoform of O14727, Isoform 4 of Apoptotic protease-activating factor 1;Isoform of O14727, Isoform 5 of Apoptotic protease-activating factor 1;Isoform of O14727, Isoform 6 of Apoptotic protease-activating factor 1	APAF1
2815.63	1985.03	1282.64	2011.48	1758.12	3042.47	1004.34	973.018	1913.57	2202.75	1515.22	1111.28	2130.8	NaN	1061.33	NaN	616.338	664.892	2	2	2	2	2	2	2	2	2	2	1	2	2	0	2	0	2	2	A0A075B7G8;O00213;O00213-2;O00213-3;O00213-4;O00213-5;O00213-6;V9GY97	A0A075B7G8;O00213;O00213-2;O00213-3;O00213-4;O00213-5;O00213-6;V9GY97	Homo sapiens	A0A075B7G8_HUMAN;APBB1_HUMAN;APBB1_HUMAN;APBB1_HUMAN;APBB1_HUMAN;APBB1_HUMAN;APBB1_HUMAN;V9GY97_HUMAN	Isoform of O00213, Amyloid beta precursor protein binding family B member 1;Amyloid beta precursor protein binding family B member 1;Isoform of O00213, Isoform 2 of Amyloid beta precursor protein binding family B member 1;Isoform of O00213, Isoform 3 of Amyloid beta precursor protein binding family B member 1;Isoform of O00213, Isoform 4 of Amyloid beta precursor protein binding family B member 1…	APBB1
4129.48	4083.82	684.806	2151.62	4181.57	NaN	5849.14	5126	5683.16	9369.92	6394.7	3639.68	10775.1	NaN	3105.66	NaN	1958.72	4854.51	7	6	4	8	7	0	2	1	4	9	6	6	1	0	3	0	8	6	Q7Z5R6	Q7Z5R6	Homo sapiens	AB1IP_HUMAN	Amyloid beta A4 precursor protein-binding family B member 1-interacting protein	APBB1IP
23372.8	24168	21378.6	26275.5	21417	22200.9	19099	25755.7	22431.2	23576.6	17006.7	19379.1	29637.1	23059.2	23129.7	25060.5	26953.9	19692.8	14	14	17	18	15	16	14	14	15	18	12	16	17	12	19	11	17	13	C9JIF9;P13798	C9JIF9;P13798	Homo sapiens	C9JIF9_HUMAN;ACPH_HUMAN	Isoform of P13798, Acylamino-acid-releasing enzyme;Acylamino-acid-releasing enzyme	APEH
66135.7	43979.9	52653.7	54855.8	60033.4	37311.7	34847.5	53927.4	52331.6	54250.4	42197.2	50724.8	52381	59899.5	54752.6	56408.9	29342.7	61723.4	11	13	16	17	9	13	12	12	13	15	11	12	14	9	14	8	10	12	P27695	P27695	Homo sapiens	APEX1_HUMAN	DNA-(apurinic or apyrimidinic site) endonuclease	APEX1
39873.2	36216.4	35023.9	41099.9	45224	33147.5	28674.9	49401.1	38146.1	42945.5	33899.4	41964.2	43754.2	49713.9	45639.5	33532.8	20888.5	44679.8	14	11	13	14	13	12	13	13	13	13	12	13	14	11	12	11	11	14	Q9BZZ5-2	Q9BZZ5-2	Homo sapiens	API5_HUMAN	Isoform of Q9BZZ5, Isoform 2 of Apoptosis inhibitor 5	API5
6939.11	2829.93	2054.37	5983.15	7770.97	4794.57	2583.28	3434.97	3241.4	4340.73	4502.07	1279.29	3111.94	NaN	2797.87	1819.84	4865.83	2812.64	2	2	3	3	3	2	3	3	2	3	1	1	3	0	3	1	3	2	Q96GX9	Q96GX9	Homo sapiens	MTNB_HUMAN	Methylthioribulose-1-phosphate dehydratase	APIP
7044.96	11917.8	5186.09	7689.58	8000.83	4829.47	6483.14	9484.96	7084.18	6955.26	13719.9	7707.96	10667.6	2615.29	6492.89	7604.77	10622.3	8416.97	9	11	13	14	10	9	11	11	11	14	13	13	14	2	13	9	13	13	Q06481;Q06481-2;Q06481-3;Q06481-4;Q06481-6	Q06481;Q06481-2;Q06481-3;Q06481-4;Q06481-6	Homo sapiens	APLP2_HUMAN	Amyloid beta precursor like protein 2;Isoform of Q06481, Isoform 2 of Amyloid beta precursor like protein 2;Isoform of Q06481, Isoform 3 of Amyloid beta precursor like protein 2;Isoform of Q06481, Isoform 4 of Amyloid beta precursor like protein 2;Isoform of Q06481, Isoform 6 of Amyloid beta precursor like protein 2	APLP2
56761.2	67359.5	58771.3	54807	60311	52151	87296.5	63551.9	56712.9	62972.8	58851.6	63728.3	60284.2	73584.2	59543.1	63371.5	94434.1	54390.8	18	20	20	19	17	17	20	19	19	20	17	20	20	14	19	15	20	18	Q9HDC9	Q9HDC9	Homo sapiens	APMAP_HUMAN	Adipocyte plasma membrane-associated protein	APMAP
2636.1	1456.2	763.061	NaN	5338.79	3920.02	12379.9	4776.89	3104.52	NaN	19310.1	3310.19	NaN	27957.8	510.194	6514.21	1223.85	3113.06	2	2	2	0	2	2	2	2	2	0	2	2	0	2	2	2	2	2	P06727	P06727	Homo sapiens	APOA4_HUMAN	Apolipoprotein A-IV	APOA4
16625	18908.9	14884.4	9165.36	21987.3	31914.8	35509	23592.6	25745.8	14769.7	71139.2	31565.3	13717.4	152288	18768.5	96320.4	30648.3	42106.7	11	13	13	12	14	14	14	13	13	13	14	14	11	13	14	13	13	14	P04114	P04114	Homo sapiens	APOB_HUMAN	Apolipoprotein B-100	APOB
5846.96	6834.1	6019.29	5082.83	5543.35	7166.69	5315.09	7558.16	6912.56	4640.46	4041.46	5792.44	5597.76	7449.79	6350.99	5835.03	4858.78	4044.84	3	3	2	3	3	3	3	3	3	2	2	3	2	3	3	1	1	2	Q9NRW3	Q9NRW3	Homo sapiens	ABC3C_HUMAN	DNA dC->dU-editing enzyme APOBEC-3C	APOBEC3C
5650.41	6203.12	13155.6	10999	2268.65	44828.1	99423.7	1824.1	5145.26	14227.4	64549.5	53932.9	2368.7	59737.8	3886.77	51938.1	3234.45	36210.9	2	2	2	2	1	2	2	2	2	2	2	2	2	2	2	2	2	2	B0YIW2;P02656	B0YIW2;P02656	Homo sapiens	B0YIW2_HUMAN;APOC3_HUMAN	Isoform of P02656, Apolipoprotein C-III;Apolipoprotein C-III	APOC3
8263.53	10821.1	4214.29	4104.43	5168.58	15407.9	35317.9	4689.5	10446.2	5737.65	32702.3	33465.7	4921.28	26702.1	7318.81	22703.3	NaN	14137.2	2	1	1	1	1	1	1	1	1	1	2	2	2	2	2	1	0	2	K7ER74;P02655;Q6P163	K7ER74;P02655;Q6P163	Homo sapiens	K7ER74_HUMAN;APOC2_HUMAN;Q6P163_HUMAN	APOC4-APOC2 readthrough, Apolipoprotein C-II;Apolipoprotein C-II;Isoform of P02655, Apolipoprotein C-II	APOC4-APOC2
63832.8	107088	34791.2	30047.5	81596.8	112570	189807	99602.7	131853	29108	340657	145790	55731.5	279853	81412.5	400927	75546	155664	6	6	6	6	6	6	6	6	6	7	7	8	5	6	8	5	7	6	P02649	P02649	Homo sapiens	APOE_HUMAN	Apolipoprotein E	APOE
NaN	NaN	NaN	NaN	NaN	NaN	NaN	NaN	NaN	NaN	NaN	1352.63	NaN	NaN	5884.04	NaN	1121.18	NaN	0	0	0	0	0	0	0	0	0	0	0	2	0	0	2	0	2	0	J3KS17;P02749	J3KS17;P02749	Homo sapiens	J3KS17_HUMAN;APOH_HUMAN	Isoform of P02749, Apolipoprotein H (Fragment);Beta-2-glycoprotein 1	APOH
17547.3	9323.17	26103.6	19532.9	13267.3	12495.3	21422.9	11831.6	11714.2	15817.5	12119.2	18005.3	11511.7	8412.02	17748.4	11690.1	25636.2	12563.5	7	6	8	8	8	8	8	7	7	8	7	8	8	4	8	6	8	8	J3KQL8;Q9BQE5	J3KQL8;Q9BQE5	Homo sapiens	J3KQL8_HUMAN;APOL2_HUMAN	Isoform of Q9BQE5, Apolipoprotein L2;Apolipoprotein L2	APOL2
9965.25	13829.2	5727.08	4238.07	15936.2	16990.3	38877.9	16847.3	26462.3	5479.48	53770.6	26323.6	5893.7	129993	11361	76836.4	15635.2	25694.3	1	1	1	1	1	1	1	1	1	1	1	1	1	1	1	1	1	1	O95445;O95445-2;Q5SRP5	O95445;O95445-2;Q5SRP5	Homo sapiens	APOM_HUMAN;APOM_HUMAN;Q5SRP5_HUMAN	Apolipoprotein M;Isoform of O95445, Isoform 2 of Apolipoprotein M;Isoform of O95445, Apolipoprotein M	APOM
12623.1	12709.1	15301.6	15973.1	15288.6	10844.3	14211.9	11921.7	14599.9	12089.1	8636.23	15427.7	11377.3	11278.3	14204.3	17933	13925.9	8064.38	2	2	2	2	2	2	2	2	2	2	2	2	2	2	2	2	2	2	G3V1B6;H7C1U8;Q9BUR5;Q9BUR5-2	G3V1B6;H7C1U8;Q9BUR5;Q9BUR5-2	Homo sapiens	G3V1B6_HUMAN;H7C1U8_HUMAN;MIC26_HUMAN;MIC26_HUMAN	Isoform of Q9BUR5, Apolipoprotein O;Isoform of Q9BUR5, MICOS complex subunit (Fragment);MICOS complex subunit MIC26;Isoform of Q9BUR5, Isoform 2 of MICOS complex subunit MIC26	APOO
14320.9	23251.3	17116.4	16244.6	19393.6	23633.5	29692	18658.4	22908.6	9125.8	19005.7	22461	14169.8	29889.3	18228.5	11551.8	26365.1	19153.4	3	4	4	5	5	5	5	5	5	4	4	5	5	1	5	3	4	5	Q6UXV4	Q6UXV4	Homo sapiens	MIC27_HUMAN	MICOS complex subunit MIC27	APOOL
8335.53	6274.21	5814.67	7923.57	5737.53	7584.57	8430.06	7496.27	6847.99	8250.54	9987.99	8513.22	8763.09	8184.43	7283.23	17073.7	11689.6	9442.33	9	6	7	9	6	7	7	8	5	7	6	8	8	3	8	7	7	8	E9PG40;P05067;P05067-9	E9PG40;P05067;P05067-9	Homo sapiens	E9PG40_HUMAN;A4_HUMAN;A4_HUMAN	Isoform of P05067, Amyloid-beta A4 protein;Amyloid-beta precursor protein;Isoform of P05067, Isoform L-APP752 of Amyloid-beta precursor protein	APP
7300.76	6584.17	7173.11	7322.5	7207.43	7204.45	6034.9	6167.3	6006.15	6868.21	7233.91	6549.54	6814.62	4958.37	6245.66	6619.65	4183.72	6672.22	12	12	13	13	13	13	8	12	13	13	12	13	13	7	13	11	11	13	Q9UKG1	Q9UKG1	Homo sapiens	DP13A_HUMAN	DCC-interacting protein 13-alpha	APPL1
27824.5	29685.7	17796.1	29211.6	21033.9	17055.5	18801.3	29661.6	20745.1	36059.2	25652.6	23550	37953.6	25083.2	30186.3	14739	38040.7	20054.5	25	24	25	28	22	24	21	27	22	29	19	22	29	14	27	12	26	21	Q8NEU8	Q8NEU8	Homo sapiens	DP13B_HUMAN	DCC-interacting protein 13-beta	APPL2
104459	108114	85576.5	94529.8	94767.3	112536	112479	72798.3	77859.9	78697.4	118708	90569.1	73091.4	94018.2	78564.8	157623	89472.2	84589.9	10	10	12	12	9	11	10	11	12	11	10	12	12	9	11	8	9	10	P07741	P07741	Homo sapiens	APT_HUMAN	Adenine phosphoribosyltransferase	APRT
31877.2	1294790	32728	9556.41	45973	34313.3	NaN	39923.9	33188.8	23259.7	13947.1	47965.3	32623.6	46097.2	21304.2	27185.7	11676.5	54785.3	4	3	1	3	4	2	0	4	5	3	4	1	5	4	4	2	3	2	O60306	O60306	Homo sapiens	AQR_HUMAN	RNA helicase aquarius	AQR
10575.4	8925.52	9945.57	12038.1	10421.4	11963.5	10053.4	10935.5	7738.54	10868.9	13640.7	10972.9	15056.6	6744.8	9081.28	11277.6	11268.9	7952.41	11	9	11	11	11	11	12	11	10	12	10	11	11	7	12	9	12	11	Q96P48;Q96P48-3	Q96P48;Q96P48-3	Homo sapiens	ARAP1_HUMAN	Arf-GAP with Rho-GAP domain, ANK repeat and PH domain-containing protein 1;Isoform of Q96P48, Isoform 3 of Arf-GAP with Rho-GAP domain, ANK repeat and PH domain-containing protein 1	ARAP1
84678.8	88832	98438.8	82869.9	78159.2	92407.2	89762.3	82972.8	88196	87481.1	76447.9	77807.1	69946.2	104872	83060.3	80199.6	71722	82438.2	33	29	33	34	33	31	32	31	32	30	26	29	33	27	32	28	29	31	B0YIW6;P48444	B0YIW6;P48444	Homo sapiens	B0YIW6_HUMAN;COPD_HUMAN	Isoform of P48444, Coatomer subunit delta;Coatomer subunit delta	ARCN1
95493.8	94934	101909	93252.8	83879.9	123196	127098	96803.1	102848	94852.9	117704	107246	83491.7	132380	91363.7	102900	95662.7	108304	15	16	15	16	15	15	15	15	15	16	15	15	16	14	15	13	15	14	A0A8V8TNZ5;A0A8V8TQC0;P84077	A0A8V8TNZ5;A0A8V8TQC0;P84077	Homo sapiens	A0A8V8TNZ5_HUMAN;A0A8V8TQC0_HUMAN;ARF1_HUMAN	Isoform of P84077, ADP-ribosylation factor (Fragment);Isoform of P84077, ADP-ribosylation factor (Fragment);ADP-ribosylation factor 1	ARF1
96518.9	89248.6	115832	86228.9	72398.2	79087.6	104142	79800.8	91801.5	68237.1	82580.9	80424.6	57783.9	92789.3	78106.7	75532.5	89525.9	74624.5	7	6	6	8	8	7	8	8	6	8	6	8	8	6	7	6	8	7	C9JAK5	C9JAK5	Homo sapiens	C9JAK5_HUMAN	Isoform of P18085, ADP ribosylation factor 4	ARF4
17212.5	16686.4	20124.8	21332.1	18221.4	21464.5	20675.5	23822	19002.6	20816.7	18649.7	15023.1	21878.4	13774.6	17221.9	10267.8	15055.3	16290.4	6	3	6	6	5	5	6	5	5	6	4	4	6	3	6	4	4	5	P84085	P84085	Homo sapiens	ARF5_HUMAN	ADP-ribosylation factor 5	ARF5
59054	52255.3	39766.4	46542.6	40378.9	48963.7	59800.6	42077.1	46245.2	44561.7	58349.9	36974.4	42152.7	63321.8	45312.3	50978.1	37416.1	39136.7	4	4	5	5	4	4	4	4	4	5	4	4	4	3	5	4	4	4	P62330	P62330	Homo sapiens	ARF6_HUMAN	ADP-ribosylation factor 6	ARF6
21757.9	19209.7	20801.5	19722.1	19888.3	19652.6	20537.8	12813.2	19033.5	22677.3	16492.5	19512.5	18509.4	18347	17515.3	16127.2	15412.6	18503.9	8	9	8	8	7	9	7	7	9	9	7	8	8	6	9	8	6	8	Q8N6T3;Q8N6T3-2	Q8N6T3;Q8N6T3-2	Homo sapiens	ARFG1_HUMAN	ADP-ribosylation factor GTPase-activating protein 1;Isoform of Q8N6T3, Isoform 2 of ADP-ribosylation factor GTPase-activating protein 1	ARFGAP1
11001.4	9605.55	10819.8	10656.3	11154	8876.04	10463.6	10564.2	10505.1	12665.3	9557.33	10336.6	11339	8704.08	10666.6	7016.91	7809.04	10325	13	12	13	14	14	14	14	14	14	12	13	12	14	10	14	12	12	13	A0A0D9SF70;E9PN48;G5E9L0;Q8N6H7	A0A0D9SF70;E9PN48;G5E9L0;Q8N6H7	Homo sapiens	A0A0D9SF70_HUMAN;E9PN48_HUMAN;G5E9L0_HUMAN;ARFG2_HUMAN	Isoform of Q8N6H7, ADP ribosylation factor GTPase activating protein 2;Isoform of Q8N6H7, ADP ribosylation factor GTPase activating protein 2;Isoform of Q8N6H7, ADP ribosylation factor GTPase activating protein 2;ADP-ribosylation factor GTPase-activating protein 2	ARFGAP2
20810	17959.5	19846.3	19249.5	17361.4	15650.1	16084.7	17655.1	15242.1	18625.4	13609.5	16324.5	18836.3	11443.6	19566	12626.3	11349.8	14592.7	10	9	10	10	10	11	9	11	10	10	7	10	10	6	10	7	10	9	Q9NP61	Q9NP61	Homo sapiens	ARFG3_HUMAN	ADP-ribosylation factor GTPase-activating protein 3	ARFGAP3
5609.58	4769.73	4421.07	5373.92	4543.4	4395.67	4432.57	4149.91	4145.42	4937.83	4921.51	3795.59	5059.62	6550.55	4319.58	4679.95	4245.18	3681.73	9	9	9	9	9	8	8	9	9	9	2	7	8	5	9	5	9	8	Q9Y6D6	Q9Y6D6	Homo sapiens	BIG1_HUMAN	Brefeldin A-inhibited guanine nucleotide-exchange protein 1	ARFGEF1
4250.66	5360.88	5415.03	4206.43	3888.01	6463.35	5615.84	4642.45	4726.59	4807.6	5346.98	4739.32	4358.98	5020.92	4625.53	5545.09	4726.01	4366.2	8	5	9	8	7	9	7	8	8	8	5	8	7	2	9	4	8	8	A0A7P0T7Z2;A0A7P0T9L9;A0A7P0TA34;Q9Y6D5	A0A7P0T7Z2;A0A7P0T9L9;A0A7P0TA34;Q9Y6D5	Homo sapiens	A0A7P0T7Z2_HUMAN;A0A7P0T9L9_HUMAN;A0A7P0TA34_HUMAN;BIG2_HUMAN	Isoform of Q9Y6D5, ADP ribosylation factor guanine nucleotide exchange factor 2;Isoform of Q9Y6D5, ADP ribosylation factor guanine nucleotide exchange factor 2;Isoform of Q9Y6D5, ADP ribosylation factor guanine nucleotide exchange factor 2;Brefeldin A-inhibited guanine nucleotide-exchange protein 2	ARFGEF2
18967.5	19289.8	12968.9	19679	16048.5	15084.1	17787	18968.6	16672	16529.5	12370.6	13777.3	13651	12165.6	14653.1	13279.9	24239	19657.6	2	2	2	2	2	2	2	2	2	2	2	2	2	1	2	1	2	2	P53367	P53367	Homo sapiens	ARFP1_HUMAN	Arfaptin-1	ARFIP1
6099.01	6150.57	7149.07	4706.06	5795.88	8252.32	6072.58	5274.09	5727.25	5464.3	6347.88	6612.16	4547.73	7335.81	6761.45	4401.42	4960.12	5897.36	6	5	7	7	3	5	4	4	5	6	2	5	6	4	6	4	5	6	A0A087X1E4;P53365;P53365-3	A0A087X1E4;P53365;P53365-3	Homo sapiens	A0A087X1E4_HUMAN;ARFP2_HUMAN;ARFP2_HUMAN	Isoform of P53365, ADP ribosylation factor interacting protein 2;Arfaptin-2;Isoform of P53365, Isoform 3 of Arfaptin-2	ARFIP2
10328	6748.03	6282.6	9245.15	11179.7	7611.84	6032.18	8444.49	7956.29	8534.91	8448.32	10058.8	9948.27	9741.3	7816.62	7600.72	2951.57	11274.2	6	5	5	5	5	4	4	6	5	6	4	6	6	4	6	3	5	6	Q9NWB6;Q9NWB6-2;Q9NWB6-3	Q9NWB6;Q9NWB6-2;Q9NWB6-3	Homo sapiens	ARGL1_HUMAN	Arginine and glutamate-rich protein 1;Isoform of Q9NWB6, Isoform 2 of Arginine and glutamate-rich protein 1;Isoform of Q9NWB6, Isoform 3 of Arginine and glutamate-rich protein 1	ARGLU1
128798	113289	137207	120375	101803	106356	96679.9	97591.6	101565	113771	115267	93897.8	100773	79784	99524.6	105870	108255	84368.8	28	28	33	32	31	32	28	30	29	33	28	30	30	18	31	21	28	28	Q07960	Q07960	Homo sapiens	RHG01_HUMAN	Rho GTPase-activating protein 1	ARHGAP1
1550.77	1042.63	2305.69	1752.76	1321.3	1469.25	2091.84	1665.07	914.777	1873.4	1278.46	1162.66	1342.87	NaN	1006.22	1404.96	716.137	1680.83	1	1	1	1	1	1	1	1	1	1	1	1	1	0	1	1	1	1	A1A4S6	A1A4S6	Homo sapiens	RHG10_HUMAN	Rho GTPase-activating protein 10	ARHGAP10
1855.31	1860.26	1885.15	2375.58	2382.74	2193.38	2583.23	1663.36	1136.54	2653.09	1295.8	2294.22	2241.33	43.7226	1200.14	740.64	1526.82	1475.18	5	5	6	7	6	4	5	4	5	6	6	7	5	2	5	4	5	5	Q1RLN5;Q8IWW6;Q8IWW6-2;Q8IWW6-3;Q8IWW6-4	Q1RLN5;Q8IWW6;Q8IWW6-2;Q8IWW6-3;Q8IWW6-4	Homo sapiens	Q1RLN5_HUMAN;RHG12_HUMAN;RHG12_HUMAN;RHG12_HUMAN;RHG12_HUMAN	Isoform of Q8IWW6, ARHGAP12 protein;Rho GTPase-activating protein 12;Isoform of Q8IWW6, Isoform 2 of Rho GTPase-activating protein 12;Isoform of Q8IWW6, Isoform 3 of Rho GTPase-activating protein 12;Isoform of Q8IWW6, Isoform 4 of Rho GTPase-activating protein 12	ARHGAP12
17001.8	14671.3	15427.5	14054.6	15336.7	11873.9	12724.5	16748.4	14029	14839.7	13046	11958	17039.4	9439.08	15420.2	9969.91	19340.5	12645.7	6	6	9	9	6	8	7	8	8	8	7	9	9	2	9	3	8	9	Q68EM7	Q68EM7	Homo sapiens	RHG17_HUMAN	Rho GTPase-activating protein 17	ARHGAP17
16266.4	22761.2	18165.4	15463.6	22183.3	14580.2	16268	16039.8	20686.6	13287.7	22543.6	17719.7	24713.9	15128.2	19500	22584.9	19311.8	19195.2	17	17	20	19	18	17	16	18	18	18	16	16	19	9	20	14	19	17	Q8N392	Q8N392	Homo sapiens	RHG18_HUMAN	Rho GTPase-activating protein 18	ARHGAP18
8267.38	1885.16	639.46	1474.5	4737.31	NaN	2116.8	NaN	1325.77	2604.98	NaN	2944.96	2293.64	NaN	2395.96	NaN	3647.79	1987.23	2	1	2	2	2	0	2	0	2	2	0	2	2	0	2	0	2	2	A0A7P0TAS2;A0A805TBS0;Q5T5U3	A0A7P0TAS2;A0A805TBS0;Q5T5U3	Homo sapiens	A0A7P0TAS2_HUMAN;A0A805TBS0_HUMAN;RHG21_HUMAN	Isoform of Q5T5U3, Rho GTPase activating protein 21;Isoform of Q5T5U3, Rho GTPase activating protein 21;Rho GTPase-activating protein 21	ARHGAP21
5448.97	5134.39	4046.88	5219.96	3975.47	6665.82	4692.26	6299.02	5483.43	6107.57	3963.58	7400.36	7571.19	4848.04	5041.08	11155.3	5109.68	5155.28	2	2	2	2	1	2	1	2	1	2	2	2	2	1	2	2	1	2	A6NHM7;D6RBJ8;Q7Z5H3;Q7Z5H3-2;Q7Z5H3-3;Q7Z5H3-5	A6NHM7;D6RBJ8;Q7Z5H3;Q7Z5H3-2;Q7Z5H3-3;Q7Z5H3-5	Homo sapiens	A6NHM7_HUMAN;D6RBJ8_HUMAN;RHG22_HUMAN;RHG22_HUMAN;RHG22_HUMAN;RHG22_HUMAN	Isoform of Q7Z5H3, Rho GTPase activating protein 22;Isoform of Q7Z5H3, Rho GTPase activating protein 22;Rho GTPase-activating protein 22;Isoform of Q7Z5H3, Isoform 2 of Rho GTPase-activating protein 22;Isoform of Q7Z5H3, Isoform 3 of Rho GTPase-activating protein 22;Isoform of Q7Z5H3, Isoform 5 of Rho GTPase-activating protein 22	ARHGAP22
1363	167.562	969.552	928.92	317.277	1970.75	1078.13	592.399	662.71	218.792	3471.17	NaN	638.546	1257.34	418.753	9531.15	NaN	3396.01	4	2	3	3	4	2	1	3	3	3	2	0	1	1	2	1	0	1	D6RCP5;Q8N264;Q8N264-2;Q8N264-3	D6RCP5;Q8N264;Q8N264-2;Q8N264-3	Homo sapiens	D6RCP5_HUMAN;RHG24_HUMAN;RHG24_HUMAN;RHG24_HUMAN	Isoform of Q8N264, Rho GTPase activating protein 24 (Fragment);Rho GTPase-activating protein 24;Isoform of Q8N264, Isoform 2 of Rho GTPase-activating protein 24;Isoform of Q8N264, Isoform 3 of Rho GTPase-activating protein 24	ARHGAP24
4372.98	4045.88	3362.91	5346.26	2853.38	5872.45	8558.63	4050.84	4183.13	3927.66	5884.56	4014.08	10607.1	4733.59	5884.08	2348.59	3144.51	3148.99	8	8	7	12	4	10	9	10	3	12	7	5	14	3	13	2	5	7	Q52LW3	Q52LW3	Homo sapiens	RHG29_HUMAN	Rho GTPase-activating protein 29	ARHGAP29
NaN	NaN	1240.77	865.555	NaN	NaN	NaN	NaN	NaN	NaN	NaN	NaN	NaN	NaN	950.348	NaN	NaN	NaN	0	0	1	1	0	0	0	0	0	0	0	0	0	0	1	0	0	0	Q2M1Z3	Q2M1Z3	Homo sapiens	RHG31_HUMAN	Rho GTPase-activating protein 31	ARHGAP31
30586.5	28607.1	34050.9	33614.2	26272.9	22925.2	20852.5	27096.9	20871.8	26769	28919.9	19978.2	27297.1	21799.4	27939.1	18545.1	18292.5	24593	32	29	34	32	29	28	23	31	25	33	22	27	32	9	30	12	24	27	Q9NRY4	Q9NRY4	Homo sapiens	RHG35_HUMAN	Rho GTPase-activating protein 35	ARHGAP35
4034.13	3134.26	3236.2	3484.53	3597.48	3156.53	5341.54	3973.84	50.257	3070.29	4661.61	3154.9	1902.58	34129.6	2736.46	1750.79	4057.13	3319	4	5	11	11	4	9	4	10	2	11	1	7	10	1	11	3	8	7	Q13017;Q13017-2	Q13017;Q13017-2	Homo sapiens	RHG05_HUMAN	Rho GTPase-activating protein 5;Isoform of Q13017, Isoform 2 of Rho GTPase-activating protein 5	ARHGAP5
178993	257297	218732	260132	247832	292023	220889	267002	242645	249674	288033	231355	256579	321601	263965	371421	282520	225933	19	21	21	21	21	21	20	21	19	21	20	20	21	16	21	19	21	20	P52565	P52565	Homo sapiens	GDIR1_HUMAN	Rho GDP-dissociation inhibitor 1	ARHGDIA
12730.2	20116.3	20307.7	6123.8	10842.5	21148	19242.2	81776	21692.2	20993.3	19260.6	23197.2	34566.3	432.317	17708	19809.2	34643.7	6207.57	7	1	8	3	5	5	1	11	5	9	1	7	1	2	8	1	10	3	P52566	P52566	Homo sapiens	GDIR2_HUMAN	Rho GDP-dissociation inhibitor 2	ARHGDIB
16629.5	15972.9	19560.4	17719.4	17399.9	16860.8	16617.2	18639.1	15680.3	16596.4	17909.2	17386.7	20197.4	16628.4	16276.5	17025.4	12196.9	17585.8	19	15	19	20	18	17	11	18	16	18	16	17	18	9	19	13	16	19	A0A8V8TMH9;M0QZR4;Q92888;Q92888-3	A0A8V8TMH9;M0QZR4;Q92888;Q92888-3	Homo sapiens	A0A8V8TMH9_HUMAN;M0QZR4_HUMAN;ARHG1_HUMAN;ARHG1_HUMAN	Isoform of Q92888, Rho guanine nucleotide exchange factor 1;Isoform of Q92888, Rho guanine nucleotide exchange factor 1;Rho guanine nucleotide exchange factor 1;Isoform of Q92888, Isoform 3 of Rho guanine nucleotide exchange factor 1	ARHGEF1
2551.03	6161.75	3557.05	3303.58	4005.86	3810.56	2476.8	3762.19	3273.22	3872.1	4723.61	3693.22	3305	8831.53	3643.14	3860.01	1955.6	4681.91	8	8	10	10	10	8	5	10	7	10	7	8	9	1	10	4	5	9	H0YAN8;O15013;O15013-4;O15013-5;O15013-6;O15013-7	H0YAN8;O15013;O15013-4;O15013-5;O15013-6;O15013-7	Homo sapiens	H0YAN8_HUMAN;ARHGA_HUMAN;ARHGA_HUMAN;ARHGA_HUMAN;ARHGA_HUMAN;ARHGA_HUMAN	Isoform of O15013, Rho guanine nucleotide exchange factor 10 (Fragment);Rho guanine nucleotide exchange factor 10;Isoform of O15013, Isoform 4 of Rho guanine nucleotide exchange factor 10;Isoform of O15013, Isoform 5 of Rho guanine nucleotide exchange factor 10;Isoform of O15013, Isoform 2 of Rho guanine nucleotide exchange factor 10;Isoform of O15013, Isoform 3 of Rho guanine nucleotide exchange…	ARHGEF10
1392.61	NaN	524.585	1148.7	786.611	1126.75	1579.1	1384.19	NaN	1433.81	NaN	2588.4	2132.43	2708.3	1442.01	NaN	2697.44	1842.1	1	0	1	1	1	1	1	1	0	1	0	1	1	1	1	0	1	1	A0A384DVK7;Q5VXI4;Q9HCE6;Q9HCE6-2;Q9HCE6-3;Q9HCE6-4;Q9HCE6-5	A0A384DVK7;Q5VXI4;Q9HCE6;Q9HCE6-2;Q9HCE6-3;Q9HCE6-4;Q9HCE6-5	Homo sapiens	A0A384DVK7_HUMAN;Q5VXI4_HUMAN;ARGAL_HUMAN;ARGAL_HUMAN;ARGAL_HUMAN;ARGAL_HUMAN;ARGAL_HUMAN	Isoform of Q9HCE6, Rho guanine nucleotide exchange factor 10 like (Fragment);Isoform of Q9HCE6, Rho guanine nucleotide exchange factor 10 like;Rho guanine nucleotide exchange factor 10-like protein;Isoform of Q9HCE6, Isoform 2 of Rho guanine nucleotide exchange factor 10-like protein;Isoform of Q9HCE6, Isoform 3 of Rho guanine nucleotide exchange factor 10-like protein;Isoform of Q9HCE6, Isoform …	ARHGEF10L
1940.76	1486.8	1567.4	1585.97	1657.43	1831.71	924.812	1553.19	598.757	1332.63	521.91	1426.16	1397.07	NaN	990.624	873.312	899.404	1340.83	3	3	3	3	3	2	2	3	2	3	2	3	2	0	2	2	2	3	O15085;O15085-2	O15085;O15085-2	Homo sapiens	ARHGB_HUMAN	Rho guanine nucleotide exchange factor 11;Isoform of O15085, Isoform 2 of Rho guanine nucleotide exchange factor 11	ARHGEF11
3986.71	4603.8	4598.78	4129.53	4165.27	3128.2	2840.16	4613.06	3239.44	4285.23	4100.85	3018.36	5094.17	1705.89	4793.24	2633.28	3137.43	2817.04	7	7	10	10	6	8	5	8	5	8	4	8	9	1	8	2	5	3	E9PMR6;Q9NZN5;Q9NZN5-2	E9PMR6;Q9NZN5;Q9NZN5-2	Homo sapiens	E9PMR6_HUMAN;ARHGC_HUMAN;ARHGC_HUMAN	Isoform of Q9NZN5, Rho guanine nucleotide exchange factor 12;Rho guanine nucleotide exchange factor 12;Isoform of Q9NZN5, Isoform 2 of Rho guanine nucleotide exchange factor 12	ARHGEF12
2936.49	2320.98	4254.26	3743.62	1836.88	4106.51	1915.92	4982.62	2969.16	2883.01	4734	2509.4	4295.76	3304.37	3766.12	2136.7	5934.94	2167.57	8	4	7	8	6	9	3	8	5	7	6	7	8	1	9	2	9	5	Q96PE2	Q96PE2	Homo sapiens	ARHGH_HUMAN	Rho guanine nucleotide exchange factor 17	ARHGEF17
32002.1	27573.6	45366.1	33419	38113.3	34411.4	28489.8	40662.5	31908.8	32006	34749.2	47280.2	28951.1	37628.9	35062.1	28937.7	23466.3	39069.7	17	16	17	18	17	16	14	15	16	19	13	19	18	15	20	14	15	18	A0A5F9ZI21;V9GYM8	A0A5F9ZI21;V9GYM8	Homo sapiens	A0A5F9ZI21_HUMAN;V9GYM8_HUMAN	Isoform of Q92974, Rho guanine nucleotide exchange factor 2;Isoform of Q92974, Rho guanine nucleotide exchange factor 2	ARHGEF2
7655.46	8999.86	5368.88	7646.49	9315.54	5738.47	5440.64	9020.83	5930.94	8955.36	6225.08	7075	7027.43	4201.54	6605.27	4289.51	3844.71	5510.53	8	8	8	8	8	8	7	8	8	8	8	8	8	4	8	5	8	8	Q8TER5;Q8TER5-3;Q8TER5-4	Q8TER5;Q8TER5-3;Q8TER5-4	Homo sapiens	ARH40_HUMAN	Rho guanine nucleotide exchange factor 40;Isoform of Q8TER5, Isoform 3 of Rho guanine nucleotide exchange factor 40;Isoform of Q8TER5, Isoform 4 of Rho guanine nucleotide exchange factor 40	ARHGEF40
NaN	NaN	2581.1	NaN	NaN	NaN	NaN	1477.28	NaN	NaN	NaN	NaN	NaN	NaN	2106.02	NaN	2186.4	NaN	0	0	1	0	0	0	0	1	0	0	0	0	0	0	2	0	2	0	Q15052;Q15052-2	Q15052;Q15052-2	Homo sapiens	ARHG6_HUMAN	Rho guanine nucleotide exchange factor 6;Isoform of Q15052, Isoform 2 of Rho guanine nucleotide exchange factor 6	ARHGEF6
8711.89	8059.51	9155.33	9306.38	8506.6	9396.1	6812.57	7999.76	7338.65	7847.69	7493.01	8103.51	9924.33	6152.81	7470.63	7517.86	9301.38	9292.29	10	8	10	10	9	10	9	10	9	10	8	9	10	6	10	5	9	10	A0A2R8YG42;A0A8V8TQ72;B1ALK7;Q14155-1;Q14155-5	A0A2R8YG42;A0A8V8TQ72;B1ALK7;Q14155-1;Q14155-5	Homo sapiens	A0A2R8YG42_HUMAN;A0A8V8TQ72_HUMAN;B1ALK7_HUMAN;ARHG7_HUMAN;ARHG7_HUMAN	Isoform of Q14155, Rho guanine nucleotide exchange factor 7;Isoform of Q14155, Rho guanine nucleotide exchange factor (GEF) 7, isoform CRA_f;Isoform of Q14155, Rho guanine nucleotide exchange factor 7;Isoform of Q14155, Isoform 1 of Rho guanine nucleotide exchange factor 7;Isoform of Q14155, Isoform 5 of Rho guanine nucleotide exchange factor 7	ARHGEF7
3529.28	5213.98	5191.36	4281.94	4153.1	5539.42	4053.14	4139.43	3668.47	4593.11	3172.98	3622.22	4263.78	5078.02	5504	7430.34	5971.21	4562.32	3	3	3	3	3	3	3	3	3	3	3	3	3	3	3	3	3	3	Q9Y4X5	Q9Y4X5	Homo sapiens	ARI1_HUMAN	E3 ubiquitin-protein ligase ARIH1	ARIH1
1954.71	1557.92	1536.97	1560.37	2216.81	2442.69	NaN	3239.99	2218.61	1555.67	1601.35	2082.97	1293.29	NaN	1771.78	1725.25	1747.73	1491.77	2	1	2	2	2	2	0	2	2	2	2	2	2	0	2	1	1	2	O95376	O95376	Homo sapiens	ARI2_HUMAN	E3 ubiquitin-protein ligase ARIH2	ARIH2
18836.3	19956.1	18892.7	16501.9	15350.5	24773	26117.6	20136.8	22674.3	20065.5	19034.9	16827.3	17350.3	22527.6	20132.6	16475.8	21380.4	17525.5	5	6	6	6	6	5	6	6	6	6	5	4	6	5	6	5	6	6	F8VYN9;P40616;P40616-2	F8VYN9;P40616;P40616-2	Homo sapiens	F8VYN9_HUMAN;ARL1_HUMAN;ARL1_HUMAN	Isoform of P40616, ADP ribosylation factor like GTPase 1;ADP-ribosylation factor-like protein 1;Isoform of P40616, Isoform 2 of ADP-ribosylation factor-like protein 1	ARL1
4966.34	275.844	2531.35	1035.94	1843.43	2769.55	2236.29	1957.55	991.665	806.208	NaN	737.932	1696.43	NaN	531.623	NaN	2214.25	747.317	2	2	2	2	2	2	2	1	2	2	0	2	2	0	1	0	2	2	Q9NXU5	Q9NXU5	Homo sapiens	ARL15_HUMAN	ADP-ribosylation factor-like protein 15	ARL15
16428.6	16397.2	15264.5	16982.5	16605.8	16118.9	12097.2	18959.6	15896.4	19112.2	18268.8	13228.6	16575.5	14882.3	16787.2	17896.3	10875.7	15049.6	5	6	6	5	6	5	4	6	6	6	6	6	6	6	6	5	6	5	P36404	P36404	Homo sapiens	ARL2_HUMAN	ADP-ribosylation factor-like protein 2	ARL2
6648.16	6162.1	6520.4	9337.93	6026.09	6573.63	5364.89	7634.46	5830.71	5062.99	8080.54	5607.37	5029.96	4708.13	6967.33	6772.78	7542.13	6460.68	3	4	4	5	3	5	4	4	5	4	3	3	4	3	5	4	4	4	Q9Y2Y0;Q9Y2Y0-2	Q9Y2Y0;Q9Y2Y0-2	Homo sapiens	AR2BP_HUMAN	ADP-ribosylation factor-like protein 2-binding protein;Isoform of Q9Y2Y0, Isoform 2 of ADP-ribosylation factor-like protein 2-binding protein	ARL2BP
30232.5	35727.4	41819.8	45243.6	35321.3	35865.7	27812.9	38437.2	28938	46324.9	30994.5	26530.8	51116.2	34239.2	42723.3	37951.9	41219.5	32589.6	12	10	14	14	11	12	8	12	12	14	8	11	14	6	13	6	12	10	P36405	P36405	Homo sapiens	ARL3_HUMAN	ADP-ribosylation factor-like protein 3	ARL3
1973.6	1242.16	1748.09	1803.76	2067.25	1960.52	2399.93	1428.02	1008.01	1199.14	24.3771	829.11	847.74	570.481	972.279	397.484	703.405	622.413	2	2	2	2	2	2	2	2	2	2	2	2	2	2	2	2	2	2	A0A0J9YXT0;Q9H0F7;Q9H0F7-2	A0A0J9YXT0;Q9H0F7;Q9H0F7-2	Homo sapiens	A0A0J9YXT0_HUMAN;ARL6_HUMAN;ARL6_HUMAN	Isoform of Q9H0F7, ADP-ribosylation factor-like protein 6 (Fragment);ADP-ribosylation factor-like protein 6;Isoform of Q9H0F7, Isoform 2 of ADP-ribosylation factor-like protein 6	ARL6
NaN	NaN	8496.73	7016.02	265.896	1970	1851.04	1146.87	1117.93	7205.45	NaN	5518.07	3392.53	882.983	5343.43	NaN	1183.6	1568.65	0	0	3	3	2	3	1	2	3	3	0	1	3	1	3	0	2	3	H3BPJ2;Q15041;Q15041-2	H3BPJ2;Q15041;Q15041-2	Homo sapiens	H3BPJ2_HUMAN;AR6P1_HUMAN;AR6P1_HUMAN	Isoform of Q15041, ADP ribosylation factor like GTPase 6 interacting protein 1 (Fragment);ADP-ribosylation factor-like protein 6-interacting protein 1;Isoform of Q15041, Isoform 2 of ADP-ribosylation factor-like protein 6-interacting protein 1	ARL6IP1
2443.51	2914.82	2257.71	4182.93	3623.45	2875.88	1770.74	3977.78	4043.7	4141.34	2644.82	4859.29	3035.26	4592.45	4080.5	1998.22	514.795	4214.28	3	3	3	3	3	3	3	3	3	3	3	4	3	3	4	2	2	3	A0A0C4DG62;A0A8C8KBE9;F5GYV5;F8WCT1;H7BZV4;Q66PJ3;Q66PJ3-1;Q66PJ3-10;Q66PJ3-2;Q66PJ3-3;Q66PJ3-4;Q66PJ3-7;Q66PJ3-9	A0A0C4DG62;A0A8C8KBE9;F5GYV5;F8WCT1;H7BZV4;Q66PJ3;Q66PJ3-1;Q66PJ3-10;Q66PJ3-2;Q66PJ3-3;Q66PJ3-4;Q66PJ3-7;Q66PJ3-9	Homo sapiens	A0A0C4DG62_HUMAN;A0A8C8KBE9_HUMAN;F5GYV5_HUMAN;F8WCT1_HUMAN;H7BZV4_HUMAN;AR6P4_HUMAN;AR6P4_HUMAN;AR6P4_HUMAN;AR6P4_HUMAN;AR6P4_HUMAN;AR6P4_HUMAN;AR6P4_HUMAN;AR6P4_HUMAN	Isoform of Q66PJ3, ADP-ribosylation factor-like protein 6-interacting protein 4;Isoform of Q66PJ3, ADP-ribosylation factor-like protein 6-interacting protein 4;Isoform of Q66PJ3, ADP-ribosylation factor-like protein 6-interacting protein 4 (Fragment);Isoform of Q66PJ3, ADP-ribosylation factor-like protein 6-interacting protein 4;Isoform of Q66PJ3, ADP-ribosylation factor-like protein 6-interactin…	ARL6IP4
23786.2	22224.1	20970.7	29461.1	22081.9	17675.2	29040.4	19130.7	21884.1	26830.4	24798.8	24010.3	29618.7	15716.4	23664.4	20643.8	42848.5	19167.4	7	6	8	8	7	6	7	6	6	8	5	8	7	5	7	6	8	7	O75915	O75915	Homo sapiens	PRAF3_HUMAN	PRA1 family protein 3	ARL6IP5
16358.9	14795.3	12917	12443.1	12781.8	12639.1	14402.6	9321.8	15357	12316.8	17622.7	14972.6	11153.6	11033.7	15018.9	14749.9	12549.6	14779.3	5	5	6	7	6	5	5	5	5	6	5	7	5	4	7	4	6	6	Q96BM9	Q96BM9	Homo sapiens	ARL8A_HUMAN	ADP-ribosylation factor-like protein 8A	ARL8A
18745.6	17568.9	15068.4	11820.1	17837.8	18781.2	22148.4	11959.6	16316	15437.2	20719.6	18479.4	12251.3	17016.5	14349.2	25460.9	18614.3	21344	3	3	3	3	3	3	3	3	3	3	3	3	3	3	3	3	3	3	Q9NVJ2	Q9NVJ2	Homo sapiens	ARL8B_HUMAN	ADP-ribosylation factor-like protein 8B	ARL8B
5309.35	15967.5	5327.41	6146.04	5195.96	10185.8	12383.9	12593.8	13710.4	3385.58	3794.49	3916.28	3945.3	16926.2	10475.2	7320.84	2296.25	3687.63	2	1	2	2	2	2	1	2	1	2	1	2	2	1	2	1	2	2	Q9NVT9	Q9NVT9	Homo sapiens	ARMC1_HUMAN	Armadillo repeat-containing protein 1	ARMC1
4364.44	5020.68	4638.73	4839.29	4149.72	4397.95	6358.35	2474.48	4608.07	3365.21	3033.24	4289.37	3803.96	3832.23	2369	4621.44	5070.12	2133.12	2	3	2	2	2	3	3	3	3	2	2	2	2	1	3	2	2	2	A0A0J9YWR7;A0A0J9YXE4;Q8N2F6;Q8N2F6-2;Q8N2F6-3;Q8N2F6-4	A0A0J9YWR7;A0A0J9YXE4;Q8N2F6;Q8N2F6-2;Q8N2F6-3;Q8N2F6-4	Homo sapiens	A0A0J9YWR7_HUMAN;A0A0J9YXE4_HUMAN;ARM10_HUMAN;ARM10_HUMAN;ARM10_HUMAN;ARM10_HUMAN	Isoform of Q8N2F6, Armadillo repeat-containing protein 10 (Fragment);Isoform of Q8N2F6, Armadillo repeat-containing protein 10 (Fragment);Armadillo repeat-containing protein 10;Isoform of Q8N2F6, Isoform 2 of Armadillo repeat-containing protein 10;Isoform of Q8N2F6, Isoform 3 of Armadillo repeat-containing protein 10;Isoform of Q8N2F6, Isoform 4 of Armadillo repeat-containing protein 10	ARMC10
2310.99	NaN	834.662	1475.17	339.413	3257.19	1661.78	NaN	NaN	2482.98	1925.77	1462.5	3026.15	3055.68	1744.27	1512.81	739.047	3371.7	1	0	2	2	1	2	2	0	0	2	1	2	1	1	2	2	1	1	B4E1N1;Q6NXE6;Q6NXE6-2	B4E1N1;Q6NXE6;Q6NXE6-2	Homo sapiens	B4E1N1_HUMAN;ARMC6_HUMAN;ARMC6_HUMAN	Isoform of Q6NXE6, Armadillo repeat containing 6;Armadillo repeat-containing protein 6;Isoform of Q6NXE6, Isoform 2 of Armadillo repeat-containing protein 6	ARMC6
5069.63	4569.41	5975.52	3864.44	5106.69	5420.39	4787.61	5199.56	6037.93	5045.91	2638.43	4446.16	5281.38	4932	5976.96	2472.85	3468.46	4932.83	1	1	1	1	1	1	1	1	1	1	1	1	1	1	1	1	1	1	B7Z637;C9J8P8;C9JAA7;C9JBY2;G5E9V6;G5E9V7;Q8IUR7;Q8IUR7-2;Q8IUR7-3;Q8IUR7-6;Q8IUR7-7;Q8IUR7-8	B7Z637;C9J8P8;C9JAA7;C9JBY2;G5E9V6;G5E9V7;Q8IUR7;Q8IUR7-2;Q8IUR7-3;Q8IUR7-6;Q8IUR7-7;Q8IUR7-8	Homo sapiens	B7Z637_HUMAN;C9J8P8_HUMAN;C9JAA7_HUMAN;C9JBY2_HUMAN;G5E9V6_HUMAN;G5E9V7_HUMAN;ARMC8_HUMAN;ARMC8_HUMAN;ARMC8_HUMAN;ARMC8_HUMAN;ARMC8_HUMAN;ARMC8_HUMAN	Isoform of Q8IUR7, Armadillo repeat-containing protein 8;Isoform of Q8IUR7, Armadillo repeat-containing protein 8 (Fragment);Isoform of Q8IUR7, Armadillo repeat-containing protein 8 (Fragment);Isoform of Q8IUR7, Armadillo repeat-containing protein 8 (Fragment);Isoform of Q8IUR7, Armadillo repeat-containing protein 8;Isoform of Q8IUR7, Armadillo repeat-containing protein 8;Armadillo repeat-contain…	ARMC8
10229.5	9057.25	7675.29	14227.5	8997.46	11590.3	9285.99	10522	9301.63	4402.38	4124.74	6354.37	8789.97	14069.9	6427.24	13600.7	15095.3	2246.03	13	11	12	15	6	15	11	12	8	8	4	8	12	5	10	10	13	4	A0A2Q3DP09;A0A804HHZ1;A0A804HIH2;A0A804HJ52;A0A804HJI1;A0A804HK42;H7BZY2;Q7Z3E5;Q7Z3E5-2	A0A2Q3DP09;A0A804HHZ1;A0A804HIH2;A0A804HJ52;A0A804HJI1;A0A804HK42;H7BZY2;Q7Z3E5;Q7Z3E5-2	Homo sapiens	A0A2Q3DP09_HUMAN;A0A804HHZ1_HUMAN;A0A804HIH2_HUMAN;A0A804HJ52_HUMAN;A0A804HJI1_HUMAN;A0A804HK42_HUMAN;H7BZY2_HUMAN;ARMC9_HUMAN;ARMC9_HUMAN	Isoform of Q7Z3E5, LisH domain-containing protein ARMC9;Isoform of Q7Z3E5, LisH domain-containing protein ARMC9;Isoform of Q7Z3E5, LisH domain-containing protein ARMC9;Isoform of Q7Z3E5, LisH domain-containing protein ARMC9;Isoform of Q7Z3E5, LisH domain-containing protein ARMC9;Isoform of Q7Z3E5, LisH domain-containing protein ARMC9;Isoform of Q7Z3E5, LisH domain-containing protein ARMC9;LisH do…	ARMC9
11077.8	11563.9	12582	12529.3	13111.5	13254.4	21979.9	13388.3	13852.2	9170.58	11699.9	17741.1	8166.57	11836.7	15199.6	10778.5	14709.4	11216.8	5	4	5	4	4	4	4	4	4	4	4	5	4	4	5	4	5	4	Q9P291	Q9P291	Homo sapiens	ARMX1_HUMAN	Armadillo repeat-containing X-linked protein 1	ARMCX1
2116.08	1213.82	1937.17	2140.59	1892.89	1398.22	2641.84	1643.96	1456.92	1448.72	1408.63	3282.79	1208.03	852.136	2236.71	816.732	2977.69	1582.46	3	3	3	3	3	3	3	3	3	3	3	3	3	2	3	2	3	3	Q7L311	Q7L311	Homo sapiens	ARMX2_HUMAN	Armadillo repeat-containing X-linked protein 2	ARMCX2
9623.56	8631.63	8019.27	8189.91	9333.29	9269.57	14703	11222.3	8250	5779.35	9852.91	9804.83	7635.44	9704.46	9330.65	14917.5	11325.9	10477	6	6	7	7	6	6	6	6	6	5	5	6	7	5	7	6	6	7	Q9UH62	Q9UH62	Homo sapiens	ARMX3_HUMAN	Armadillo repeat-containing X-linked protein 3	ARMCX3
3067.94	3936.72	3926.63	3553.95	3564.44	3665.44	3395.15	4426.59	3267.87	3607.19	3363.71	1275.83	2388.87	NaN	2984.43	3873.08	2746.23	2886.08	2	3	3	3	3	3	3	3	2	3	3	2	3	0	3	1	3	3	Q5T2E6	Q5T2E6	Homo sapiens	ARMD3_HUMAN	Armadillo-like helical domain-containing protein 3	ARMH3
4098.24	5898.53	5465.78	5468.07	5326.77	7471.83	5925.8	4370.9	5712.18	4966.7	6396.49	4111.64	4822.97	7366.93	5736.31	7618.6	2946.48	4035.62	5	5	5	6	4	5	5	4	5	6	3	3	5	2	6	3	4	3	Q9H993	Q9H993	Homo sapiens	ARMT1_HUMAN	Damage-control phosphatase ARMT1	ARMT1
27767.5	26625.3	29035.8	24586.1	26068.5	43424.3	33026.2	26603.8	31408.8	20353	39936.4	25221.3	10608.7	35804.9	20051.8	40614.4	32899.8	30763.1	2	1	2	2	1	2	2	1	2	2	2	2	2	1	2	1	2	2	Q92747	Q92747	Homo sapiens	ARC1A_HUMAN	Actin-related protein 2/3 complex subunit 1A	ARPC1A
59300.4	46862.5	45812	46713.4	43576.5	41264.4	31580.1	50926.8	38612.8	45031.2	40787.9	37245	38365.1	22149.8	34246	40936.5	41644.9	26704.7	4	4	5	5	5	4	4	4	4	5	4	5	4	4	5	4	5	5	O15143	O15143	Homo sapiens	ARC1B_HUMAN	Actin-related protein 2/3 complex subunit 1B	ARPC1B
54693.9	64363.6	65393.5	59014.4	49972.8	70923	62768.8	65623.1	66809.7	63067.9	75999.1	56279.7	46717.4	79295.3	50945.7	63019.2	81971.6	63051	32	35	37	37	34	36	33	36	33	38	33	35	33	27	35	30	35	35	O15144	O15144	Homo sapiens	ARPC2_HUMAN	Actin-related protein 2/3 complex subunit 2	ARPC2
175952	160077	185790	182679	146171	170897	131922	171579	158100	174307	178108	139844	144661	148858	135011	149782	208736	161293	11	9	11	11	10	10	11	11	9	12	8	10	12	8	10	7	11	11	O15145	O15145	Homo sapiens	ARPC3_HUMAN	Actin-related protein 2/3 complex subunit 3	ARPC3
167982	178358	156813	166355	152139	211115	191541	176869	180851	153523	233939	177576	125234	219577	149838	211397	206562	175791	13	13	13	13	13	13	13	13	13	13	12	13	12	12	13	10	13	13	F8WCF6;P59998;P59998-3	F8WCF6;P59998;P59998-3	Homo sapiens	F8WCF6_HUMAN;ARPC4_HUMAN;ARPC4_HUMAN	ARPC4-TTLL3 readthrough, Actin-related protein 2/3 complex subunit 4;Actin-related protein 2/3 complex subunit 4;Isoform of P59998, Isoform 3 of Actin-related protein 2/3 complex subunit 4	ARPC4-TTLL3
25044.1	26806.6	28295.2	26193.8	23994.5	26154.3	20987.7	26036.9	23886.6	28014.6	28155.9	26246.9	22471.7	24034.5	21223.2	28683.5	34381.2	25093.5	14	13	18	19	16	16	14	17	16	19	15	16	17	14	17	13	18	16	O15511	O15511	Homo sapiens	ARPC5_HUMAN	Actin-related protein 2/3 complex subunit 5	ARPC5
48725.9	53138.8	46495.5	49925.8	47759.2	40688.6	53274.2	44132.4	51543.3	38783.1	47809.9	41433.2	44681.6	47205.3	40168.3	55629.8	44978.5	50189.2	9	9	10	10	9	9	9	9	9	9	8	9	9	8	9	7	9	9	Q9BPX5	Q9BPX5	Homo sapiens	ARP5L_HUMAN	Actin-related protein 2/3 complex subunit 5-like protein	ARPC5L
19888.7	18589.8	17490.1	19109.6	20353.2	20059.3	17414.2	15319.5	20365.8	23393.7	12706.2	22300.5	13915.8	22716.9	20963	26514.3	24476	27022.2	3	3	3	3	3	3	3	3	3	3	3	3	3	3	3	3	3	3	H3BMD8;H3BQ52;P56211;P56211-2	H3BMD8;H3BQ52;P56211;P56211-2	Homo sapiens	H3BMD8_HUMAN;H3BQ52_HUMAN;ARP19_HUMAN;ARP19_HUMAN	Isoform of P56211, cAMP regulated phosphoprotein 19;Isoform of P56211, cAMP regulated phosphoprotein 19;cAMP-regulated phosphoprotein 19;Isoform of P56211, Isoform ARPP-16 of cAMP-regulated phosphoprotein 19	ARPP19
23248.8	22838.8	22434	28196.8	22183.3	21418.6	16457.5	14684.1	12999.6	9642.38	27288.5	22447.9	11204	12932.5	16668.6	34427.8	29169.1	27471	8	7	9	9	7	8	7	8	7	7	8	7	7	3	8	5	9	7	A0A0C4DFZ2;P15289;P15289-2	A0A0C4DFZ2;P15289;P15289-2	Homo sapiens	A0A0C4DFZ2_HUMAN;ARSA_HUMAN;ARSA_HUMAN	Isoform of P15289, Arylsulfatase A;Arylsulfatase A;Isoform of P15289, Isoform 2 of Arylsulfatase A	ARSA
12081.2	16468.3	9222.01	6558.12	8906.42	11714.7	7415.72	5460.11	4806.28	5202.71	10387	7375.41	4208.98	3882.05	7290.44	8318.12	7259.78	5598.42	6	6	8	6	5	6	4	5	6	6	7	8	6	3	8	5	6	6	P15848	P15848	Homo sapiens	ARSB_HUMAN	Arylsulfatase B	ARSB
1581.25	3276.02	1181.25	4073.35	1176.79	2476.72	743.402	2137.63	NaN	5021.06	2394.16	2925.53	653.224	1004.26	4170.32	1752.93	NaN	1204.38	2	1	4	3	1	2	1	3	0	4	2	3	2	1	4	1	0	3	Q9HBK9;Q9HBK9-2	Q9HBK9;Q9HBK9-2	Homo sapiens	AS3MT_HUMAN	Arsenite methyltransferase;Isoform of Q9HBK9, Isoform 2 of Arsenite methyltransferase	AS3MT
33210.6	29049.2	34922.2	36638.3	36656.1	38674.1	43332	18706.3	26207.8	20624.3	62630.9	29523.2	18638.9	18352.2	20097	102276	66084	29073	10	10	9	10	9	9	9	9	9	9	9	10	10	6	9	10	10	10	A0A1B0GTM3;A0A1B0GUA4;A0A1B0GW68;Q13510;Q13510-2	A0A1B0GTM3;A0A1B0GUA4;A0A1B0GW68;Q13510;Q13510-2	Homo sapiens	A0A1B0GTM3_HUMAN;A0A1B0GUA4_HUMAN;A0A1B0GW68_HUMAN;ASAH1_HUMAN;ASAH1_HUMAN	Isoform of Q13510, ceramidase;Isoform of Q13510, ceramidase;Isoform of Q13510, ceramidase;Acid ceramidase;Isoform of Q13510, Isoform 2 of Acid ceramidase	ASAH1
3887.32	4599.48	4421.18	4219.07	3415.55	4360.56	3535.7	4600.98	3263.35	4017.4	4897.09	3995.71	4797.52	3562.43	4645.68	3294.25	8415.53	3851.64	16	15	14	16	15	12	14	14	14	15	12	16	15	6	15	9	16	11	A0A0A0MRE5;Q9ULH1;Q9ULH1-2	A0A0A0MRE5;Q9ULH1;Q9ULH1-2	Homo sapiens	A0A0A0MRE5_HUMAN;ASAP1_HUMAN;ASAP1_HUMAN	Isoform of Q9ULH1, ArfGAP with SH3 domain, ankyrin repeat and PH domain 1;Arf-GAP with SH3 domain, ANK repeat and PH domain-containing protein 1;Isoform of Q9ULH1, Isoform 1 of Arf-GAP with SH3 domain, ANK repeat and PH domain-containing protein 1	ASAP1
4153.11	3186.5	2521.47	3255.73	3340.42	3626.98	4987.91	4324.17	3667.36	3600.89	5140.02	3373.1	3852.44	NaN	3832.97	9293.44	NaN	2897.26	3	4	4	4	2	2	3	4	2	4	2	3	4	0	4	1	0	3	O43150;O43150-2	O43150;O43150-2	Homo sapiens	ASAP2_HUMAN	Arf-GAP with SH3 domain, ANK repeat and PH domain-containing protein 2;Isoform of O43150, Isoform 2 of Arf-GAP with SH3 domain, ANK repeat and PH domain-containing protein 2	ASAP2
966.786	NaN	1193.22	815.595	1363.05	NaN	NaN	NaN	NaN	NaN	NaN	NaN	NaN	NaN	NaN	NaN	NaN	NaN	1	0	1	1	1	0	0	0	0	0	0	0	0	0	0	0	0	0	H0YER8;Q8TDY4;Q8TDY4-3	H0YER8;Q8TDY4;Q8TDY4-3	Homo sapiens	H0YER8_HUMAN;ASAP3_HUMAN;ASAP3_HUMAN	Isoform of Q8TDY4, Arf-GAP with SH3 domain, ANK repeat and PH domain-containing protein 3 (Fragment);Arf-GAP with SH3 domain, ANK repeat and PH domain-containing protein 3;Isoform of Q8TDY4, Isoform 3 of Arf-GAP with SH3 domain, ANK repeat and PH domain-containing protein 3	ASAP3
2421.68	2502.94	2456.32	1919.1	2247.06	1994.41	1853.81	1369.97	2821.33	2319.75	1676.36	1999.57	NaN	1594.95	1249.89	NaN	NaN	1319.66	1	1	1	1	1	1	1	1	1	1	1	1	0	1	1	0	0	1	B9A047;Q9Y576	B9A047;Q9Y576	Homo sapiens	B9A047_HUMAN;ASB1_HUMAN	Isoform of Q9Y576, Ankyrin repeat and SOCS box containing 1;Ankyrin repeat and SOCS box protein 1	ASB1
1322.06	NaN	866.699	988.11	1149.53	NaN	1157.83	525.574	NaN	587.163	NaN	1521.64	1712.88	NaN	NaN	NaN	659.183	1352.35	1	0	1	1	1	0	1	1	0	1	0	1	1	0	0	0	1	1	H7BYZ6;Q9Y575;Q9Y575-2;Q9Y575-3	H7BYZ6;Q9Y575;Q9Y575-2;Q9Y575-3	Homo sapiens	H7BYZ6_HUMAN;ASB3_HUMAN;ASB3_HUMAN;ASB3_HUMAN	Isoform of Q9Y575, Ankyrin repeat and SOCS box containing 3 (Fragment);Ankyrin repeat and SOCS box protein 3;Isoform of Q9Y575, Isoform 2 of Ankyrin repeat and SOCS box protein 3;Isoform of Q9Y575, Isoform 3 of Ankyrin repeat and SOCS box protein 3	ASB3
2325.68	2416.87	2528.77	2273.19	2859.93	2663.26	2084.49	3205.93	2340.28	2549.31	2599.54	2545.99	1771	1590.33	1709.56	2259.55	1334.88	2707.49	2	2	2	1	2	2	2	2	2	2	2	2	2	2	2	2	2	2	F6TX30;Q9NWX5	F6TX30;Q9NWX5	Homo sapiens	F6TX30_HUMAN;ASB6_HUMAN	Isoform of Q9NWX5, Ankyrin repeat and SOCS box containing 6;Ankyrin repeat and SOCS box protein 6	ASB6
4931.5	3727.37	4913.04	4814.67	4454.16	4621.83	4040.14	5985.77	4247.32	4713.55	4009.75	3927.57	3620.18	3511.82	4554.5	4702.69	4476.79	4249.28	9	8	9	7	9	8	7	8	9	8	5	6	8	3	8	5	7	8	Q9H1I8	Q9H1I8	Homo sapiens	ASCC2_HUMAN	Activating signal cointegrator 1 complex subunit 2	ASCC2
5943.29	6047.64	7095.09	6315.82	6135.18	7192.69	6372.04	7930	7075.1	6350	6439.99	4883.42	4888.14	6841.79	6864.79	6790.27	7120.03	5748.27	19	18	22	22	18	20	17	19	20	19	14	17	19	6	21	9	18	18	Q8N3C0	Q8N3C0	Homo sapiens	ASCC3_HUMAN	Activating signal cointegrator 1 complex subunit 3	ASCC3
6200.74	7654.8	NaN	NaN	14943.7	NaN	NaN	9932.71	11115.7	NaN	11635.9	NaN	6218.31	11025.9	7508.63	12036.7	16935.5	NaN	1	1	0	0	1	0	0	1	1	0	1	0	1	1	1	1	1	0	Q6XD76	Q6XD76	Homo sapiens	ASCL4_HUMAN	Achaete-scute homolog 4	ASCL4
6121.07	5366.4	5843.7	4941.03	6241.2	6498.54	5695.64	5362.22	5401.76	5054.01	4464.93	5670.18	5060.53	4939.74	4705.08	4959.95	3907.75	4953.06	2	3	3	3	3	3	3	3	2	3	3	2	3	2	3	2	3	3	L0R819;U3KQ49;U3KQP1;U3KQP6	L0R819;U3KQ49;U3KQP1;U3KQP6	Homo sapiens	ASURF_HUMAN;U3KQ49_HUMAN;U3KQP1_HUMAN;U3KQP6_HUMAN	ASNSD1 upstream open reading frame protein;Isoform of L0R819, ASNSD1 upstream open reading frame;readthrough, Asparagine synthetase domain-containing protein 1 (Fragment);Isoform of L0R819, ASNSD1 upstream open reading frame	ASDURF
8162.33	1692.85	5199.12	6023.56	7800.8	3425.06	1314.83	3885.45	2684.64	4735.95	4151.37	5764.9	5026.75	2820.82	6129.04	3839.08	548.819	4289.05	2	2	2	2	2	2	2	2	2	2	2	2	2	2	2	2	2	2	F5H8F7;Q9UBL3;Q9UBL3-2;Q9UBL3-3	F5H8F7;Q9UBL3;Q9UBL3-2;Q9UBL3-3	Homo sapiens	F5H8F7_HUMAN;ASH2L_HUMAN;ASH2L_HUMAN;ASH2L_HUMAN	Isoform of Q9UBL3, ASH2 like, histone lysine methyltransferase complex subunit;Set1/Ash2 histone methyltransferase complex subunit ASH2;Isoform of Q9UBL3, Isoform 2 of Set1/Ash2 histone methyltransferase complex subunit ASH2;Isoform of Q9UBL3, Isoform 3 of Set1/Ash2 histone methyltransferase complex subunit ASH2	ASH2L
5895.32	8983.17	6790.93	10166.1	5000.18	10468.8	10241.1	6197.97	6872.44	6178.42	16407.3	5924.14	7218.83	11571.9	5504.74	24762.5	7946.91	5556.06	13	13	15	17	12	15	15	13	13	14	15	13	16	9	14	15	13	11	P04424	P04424	Homo sapiens	ARLY_HUMAN	Argininosuccinate lyase	ASL
12910.1	7404.33	9819.53	10583.7	7863.49	12283.4	8429.54	10177.4	6833.59	9106.77	7988.71	8598.56	7855.52	NaN	9325.06	11657.6	9881.53	8496.71	6	5	8	8	5	7	4	7	7	8	2	6	6	0	7	5	7	5	O95671;O95671-2	O95671;O95671-2	Homo sapiens	ASML_HUMAN	Probable bifunctional dTTP/UTP pyrophosphatase/methyltransferase protein;Isoform of O95671, Isoform 2 of Probable bifunctional dTTP/UTP pyrophosphatase/methyltransferase protein	ASMTL
43415.6	35689.5	47743.5	27580.5	27482.2	36358	21425	23538.1	27302.7	25772	22714.2	30814.6	24041.3	52086.6	31768.2	13084.1	12855.5	50339.6	17	13	16	16	14	15	11	13	15	15	11	17	15	12	16	6	11	17	P08243;P08243-2	P08243;P08243-2	Homo sapiens	ASNS_HUMAN	Asparagine synthetase [glutamine-hydrolyzing];Isoform of P08243, Isoform 2 of Asparagine synthetase [glutamine-hydrolyzing]	ASNS
60629.9	49682.6	45360	45119.8	43913.3	37613.3	55496	54555.8	43747	68422.1	40901.9	42951.1	55057.2	37091.9	47512	49845.3	110749	43427	35	33	38	38	31	33	35	37	37	36	31	34	38	21	39	28	36	34	Q12797	Q12797	Homo sapiens	ASPH_HUMAN	Aspartyl/asparaginyl beta-hydroxylase	ASPH
13979.5	11958	11141.6	10212.3	12523.1	11354	10458.9	13408.8	10912.4	12003.8	11430.9	10603.5	11862.3	12572.4	12574.5	13451.9	9738.68	9751.09	5	5	5	5	5	5	5	5	5	5	5	5	5	3	5	5	5	5	Q9BZE9;Q9BZE9-2;Q9BZE9-3	Q9BZE9;Q9BZE9-2;Q9BZE9-3	Homo sapiens	ASPC1_HUMAN	Tether containing UBX domain for GLUT4;Isoform of Q9BZE9, Isoform 2 of Tether containing UBX domain for GLUT4;Isoform of Q9BZE9, Isoform 3 of Tether containing UBX domain for GLUT4	ASPSCR1
16525.6	13972.3	16386.1	18433.9	22289.7	32053.5	15574.5	6410.8	8618.8	2770.7	14734.7	38149.8	9199.81	13834.3	15100.2	15513.3	14861.8	19611.4	18	18	20	19	18	19	17	14	13	11	15	20	16	8	17	16	18	19	P00966	P00966	Homo sapiens	ASSY_HUMAN	Argininosuccinate synthase	ASS1
5198	7478.64	5033.03	4683.63	8462.5	11199.7	13737.5	7035.67	11001.5	4628.73	10427.7	9117.38	3642.9	12609	6911	9649.97	5647.93	9587.67	4	4	4	5	4	5	5	5	5	4	3	5	4	3	5	4	4	5	Q8NBU5	Q8NBU5	Homo sapiens	ATAD1_HUMAN	Outer mitochondrial transmembrane helix translocase	ATAD1
12505.9	15590.8	12264.3	11628.7	19256.7	16079.6	22104.2	16759.3	23583.4	17221.5	17161	20581.1	17894.2	12158	20856.1	13628.2	10346	14765.9	22	25	22	26	25	27	26	26	26	25	23	27	23	13	28	21	21	22	Q9NVI7-2	Q9NVI7-2	Homo sapiens	ATD3A_HUMAN	Isoform of Q9NVI7, Isoform 2 of ATPase family AAA domain-containing protein 3A	ATAD3A
6508.14	5479.66	5836.99	5592.55	5955.07	6337.88	6682.94	5783.19	5900.74	6122.45	7299.53	6179.06	5784.36	6056.31	5596.73	5806.12	4896.81	5857.85	3	3	3	3	3	3	3	2	3	3	2	3	3	2	3	2	2	3	A0A8I5KNT9;A0A8I5KS65;A0A8I5KT53;A0A8I5KVF5;A0A8I5KVR2;A0A8I5KWF1;A0A8I5KWU7;A0A8I5KX91;A0A8I5KXC6;A0A8I5KXU0;A0A8I5KYL1;A0A8I5KZ24;A0A8I5QKV3;F5GXE4;O95260-2	A0A8I5KNT9;A0A8I5KS65;A0A8I5KT53;A0A8I5KVF5;A0A8I5KVR2;A0A8I5KWF1;A0A8I5KWU7;A0A8I5KX91;A0A8I5KXC6;A0A8I5KXU0;A0A8I5KYL1;A0A8I5KZ24;A0A8I5QKV3;F5GXE4;O95260-2	Homo sapiens	A0A8I5KNT9_HUMAN;A0A8I5KS65_HUMAN;A0A8I5KT53_HUMAN;A0A8I5KVF5_HUMAN;A0A8I5KVR2_HUMAN;A0A8I5KWF1_HUMAN;A0A8I5KWU7_HUMAN;A0A8I5KX91_HUMAN;A0A8I5KXC6_HUMAN;A0A8I5KXU0_HUMAN;A0A8I5KYL1_HUMAN;A0A8I5KZ24_HUMAN;A0A8I5QKV3_HUMAN;F5GXE4_HUMAN;ATE1_HUMAN	Isoform of O95260, Arginyl-tRNA--protein transferase 1;Isoform of O95260, Arginyl-tRNA--protein transferase 1;Isoform of O95260, Arginyl-tRNA--protein transferase 1;Isoform of O95260, Arginyltransferase 1;Isoform of O95260, Arginyl-tRNA--protein transferase 1;Isoform of O95260, Arginyl-tRNA--protein transferase 1;Isoform of O95260, arginyltransferase;Isoform of O95260, Arginyl-tRNA--protein trans…	ATE1
3526.75	3239.56	2674.68	2927.74	2418.26	2499.49	2040.6	2435.15	3293.38	2767.72	3414.75	3729.83	2382.04	3834.08	2321.99	2144.78	1587.42	2394.15	1	1	1	1	1	1	1	1	1	1	1	1	1	1	1	1	1	1	O94817	O94817	Homo sapiens	ATG12_HUMAN	Ubiquitin-like protein ATG12	ATG12
3245.83	3456.56	2885.25	2058.03	3189.49	2073.23	2754.19	1217.46	2570.43	3491.84	2835.42	3434.58	3570.16	3518.88	3954.65	1553.88	2770.31	2612.03	5	4	6	6	5	6	5	4	6	6	4	6	5	1	5	2	4	5	E7EVC7;Q676U5;Q676U5-2	E7EVC7;Q676U5;Q676U5-2	Homo sapiens	E7EVC7_HUMAN;A16L1_HUMAN;A16L1_HUMAN	Isoform of Q676U5, Autophagy related 16 like 1;Autophagy-related protein 16-1;Isoform of Q676U5, Isoform 2 of Autophagy-related protein 16-1	ATG16L1
1938.31	6772.56	832.723	1986.25	838.221	1936.46	976.387	1346.28	1030.86	1560.46	1558.33	1281.61	1435.27	NaN	1603.79	3250.93	1180.67	NaN	3	2	2	2	2	2	1	2	2	4	1	2	2	0	2	1	3	0	Q96BY7	Q96BY7	Homo sapiens	ATG2B_HUMAN	Autophagy-related protein 2 homolog B	ATG2B
21025.5	23298.9	22570.8	23114.8	22749.3	20893.6	17003.6	23001.3	22878.2	22982.7	17329.7	22226.3	24869.5	23682.2	26513.5	21227.9	20324.6	21376.2	10	11	12	12	10	10	10	9	11	12	10	12	12	7	12	7	12	12	Q9NT62	Q9NT62	Homo sapiens	ATG3_HUMAN	Ubiquitin-like-conjugating enzyme ATG3	ATG3
5103.53	10242.6	8697.01	8157.87	7653.65	10960.6	9947.29	6520.1	8937.74	8642.33	4957	10300.7	4560.86	14852.2	11087.1	9622.75	9600.41	10854.7	1	1	1	1	1	1	1	1	1	1	1	1	1	1	1	1	1	1	C9JIK8;F2Z2K8;H0Y2Y0;Q9Y4P1;Q9Y4P1-2;Q9Y4P1-6	C9JIK8;F2Z2K8;H0Y2Y0;Q9Y4P1;Q9Y4P1-2;Q9Y4P1-6	Homo sapiens	C9JIK8_HUMAN;F2Z2K8_HUMAN;H0Y2Y0_HUMAN;ATG4B_HUMAN;ATG4B_HUMAN;ATG4B_HUMAN	Isoform of Q9Y4P1, Cysteine protease (Fragment);Isoform of Q9Y4P1, Autophagy related 4B cysteine peptidase;Isoform of Q9Y4P1, Autophagy related 4B cysteine peptidase (Fragment);Cysteine protease ATG4B;Isoform of Q9Y4P1, Isoform 2 of Cysteine protease ATG4B;Isoform of Q9Y4P1, Isoform 6 of Cysteine protease ATG4B	ATG4B
3134.85	2893.79	3125.74	2867.98	2470.71	3287.41	2729.04	3209.6	2964.63	3294.12	2745.42	3008.58	3615.44	3044.07	4383.22	1034.36	3019.11	3263.51	4	3	4	4	3	3	2	3	3	4	4	3	4	2	3	2	4	4	A0A2R8Y718;Q9H1Y0	A0A2R8Y718;Q9H1Y0	Homo sapiens	A0A2R8Y718_HUMAN;ATG5_HUMAN	Isoform of Q9H1Y0, Autophagy protein 5;Autophagy protein 5	ATG5
7564.65	7539.5	7630.82	7413.36	6621.16	6772.71	6329.39	6597.45	7218.12	7623.63	8059.73	7441.36	5309.51	8976.28	7112.94	6133.68	8219.81	6972.03	9	10	10	10	10	11	8	7	7	9	6	10	11	5	9	4	9	10	O95352	O95352	Homo sapiens	ATG7_HUMAN	Ubiquitin-like modifier-activating enzyme ATG7	ATG7
3146.85	2053.08	2414.37	2282.01	2238.78	2520.48	1836.9	1672.89	2494.02	2627.94	2051.37	1782.73	2162.25	1249.86	2088.36	2207.47	1677.51	1790.9	1	2	1	1	1	1	1	2	2	1	2	1	1	1	2	2	2	2	H7C1G6;Q7Z3C6;Q7Z3C6-2	H7C1G6;Q7Z3C6;Q7Z3C6-2	Homo sapiens	H7C1G6_HUMAN;ATG9A_HUMAN;ATG9A_HUMAN	Isoform of Q7Z3C6, Autophagy-related protein 9 (Fragment);Autophagy-related protein 9A;Isoform of Q7Z3C6, Isoform 2 of Autophagy-related protein 9A	ATG9A
86049.2	81451.8	88363.9	85484.1	88794.1	76895.1	71224.5	84445.3	84364.6	71281	98994.6	80236.5	85221.1	109594	83873.9	122135	83858.4	81943.9	43	42	47	47	44	43	41	43	43	45	42	45	45	37	44	39	43	46	P31939	P31939	Homo sapiens	PUR9_HUMAN	Bifunctional purine biosynthesis protein ATIC	ATIC
13047.4	13046.8	10126.1	7427.65	10684.6	12124.3	9570.08	8930.07	7501.88	12498.5	12628.7	11291.5	10831	7063.14	9041.27	4529.74	5871.65	11199.6	4	6	7	6	6	2	6	4	3	7	6	4	7	2	5	2	7	6	A0A804HLC1;Q8WXF7;Q8WXF7-2	A0A804HLC1;Q8WXF7;Q8WXF7-2	Homo sapiens	A0A804HLC1_HUMAN;ATLA1_HUMAN;ATLA1_HUMAN	Isoform of Q8WXF7, Atlastin GTPase 1;Atlastin-1;Isoform of Q8WXF7, Isoform 2 of Atlastin-1	ATL1
6485.1	5009.5	5764.98	5837.89	6832.33	5794.55	3249.09	5747.45	6228.7	4818.4	5488.22	5254.22	2476.54	8061	5387.49	5252.22	2899.23	5268.54	4	2	3	3	4	2	3	3	3	4	2	4	4	1	3	1	3	3	B5MCN0;Q8NHH9;Q8NHH9-2;Q8NHH9-3;Q8NHH9-4;Q8NHH9-5	B5MCN0;Q8NHH9;Q8NHH9-2;Q8NHH9-3;Q8NHH9-4;Q8NHH9-5	Homo sapiens	B5MCN0_HUMAN;ATLA2_HUMAN;ATLA2_HUMAN;ATLA2_HUMAN;ATLA2_HUMAN;ATLA2_HUMAN	Isoform of Q8NHH9, Atlastin GTPase 2;Atlastin-2;Isoform of Q8NHH9, Isoform 2 of Atlastin-2;Isoform of Q8NHH9, Isoform 3 of Atlastin-2;Isoform of Q8NHH9, Isoform 4 of Atlastin-2;Isoform of Q8NHH9, Isoform 5 of Atlastin-2	ATL2
43945.5	46402.8	39761.2	38664.1	45338.4	37786.2	50862.9	40218.2	44445.1	48167.2	42927.5	42738.1	40326.9	36273.5	36215.3	32419.1	35368.2	40782.4	30	31	32	31	32	32	29	30	31	34	27	31	32	22	32	22	31	31	Q6DD88	Q6DD88	Homo sapiens	ATLA3_HUMAN	Atlastin-3	ATL3
48094.6	50339.5	45907.2	46913.8	45753.4	32392.5	33257.7	38822.5	35464	42827.9	47782.9	35952	44954.9	26649.6	39456.1	48252.7	67543.5	33388.9	6	5	7	7	5	7	4	6	7	7	5	6	7	3	6	4	6	5	E5RGN3;E5RIM7;O00244	E5RGN3;E5RIM7;O00244	Homo sapiens	E5RGN3_HUMAN;E5RIM7_HUMAN;ATOX1_HUMAN	Isoform of O00244, Antioxidant 1 copper chaperone;Isoform of O00244, Antioxidant 1 copper chaperone;Copper transport protein ATOX1	ATOX1
882.922	2159.22	1492.99	2658.83	1606.94	4231.53	5966.89	3971.94	3985.25	1653.98	9359.59	2545.52	2165.17	NaN	NaN	12752.4	2102.16	NaN	1	1	1	1	1	1	1	1	1	1	1	1	1	0	0	1	1	0	H7C4W6;Q9Y2G3	H7C4W6;Q9Y2G3	Homo sapiens	H7C4W6_HUMAN;AT11B_HUMAN	Isoform of Q9Y2G3, Phospholipid-transporting ATPase (Fragment);Phospholipid-transporting ATPase IF	ATP11B
3748.42	3160.11	3617.3	2723.66	3003.63	3822.17	4299.45	3093.07	4417.32	4478.41	2973.29	3359.05	6786.74	471.614	3365.48	6621.55	5280.35	1942.79	5	4	5	4	6	2	5	3	5	5	2	4	4	1	4	1	4	2	A0A067XG54;A0A804HIW2;Q8NB49;Q8NB49-2;Q8NB49-3;Q8NB49-4	A0A067XG54;A0A804HIW2;Q8NB49;Q8NB49-2;Q8NB49-3;Q8NB49-4	Homo sapiens	A0A067XG54_HUMAN;A0A804HIW2_HUMAN;AT11C_HUMAN;AT11C_HUMAN;AT11C_HUMAN;AT11C_HUMAN	Isoform of Q8NB49, Phospholipid-transporting ATPase;Isoform of Q8NB49, Phospholipid-transporting ATPase;Phospholipid-transporting ATPase IG;Isoform of Q8NB49, Isoform 2 of Phospholipid-transporting ATPase IG;Isoform of Q8NB49, Isoform 3 of Phospholipid-transporting ATPase IG;Isoform of Q8NB49, Isoform 4 of Phospholipid-transporting ATPase IG	ATP11C
21996.8	22905.4	16943.7	17679.7	21639.7	11367	20519	15860.3	16484.8	13781.2	12478.3	19479.8	19454.4	10358.3	15840	15072.8	16608.8	12139.8	1	1	1	1	1	1	1	1	1	1	1	1	1	1	1	1	1	1	P54707;P54707-2	P54707;P54707-2	Homo sapiens	AT12A_HUMAN	Potassium-transporting ATPase alpha chain 2;Isoform of P54707, Isoform 2 of Potassium-transporting ATPase alpha chain 2	ATP12A
27520.8	26946.1	20779.2	18458.9	24853.5	18640.6	28261.3	15615	26758.9	22405	20451.4	24353.4	17039.6	15771.9	22699.6	16850	24680.2	21242.3	22	22	24	23	22	22	23	21	23	24	22	23	23	19	24	19	22	22	Q9HD20;Q9HD20-2	Q9HD20;Q9HD20-2	Homo sapiens	AT131_HUMAN	Endoplasmic reticulum transmembrane helix translocase;Isoform of Q9HD20, Isoform B of Endoplasmic reticulum transmembrane helix translocase	ATP13A1
20357	21836.3	46812.6	19987.1	50755.5	45876.1	72979.4	21212.2	39975.2	20505.9	36405.2	34355.4	18026.2	43030.5	21392.1	40221.1	25497	24036.5	3	5	7	6	7	7	7	3	5	5	2	7	4	4	6	5	4	6	A0A2R8Y635;A0A2R8YDN7;Q9H7F0	A0A2R8Y635;A0A2R8YDN7;Q9H7F0	Homo sapiens	A0A2R8Y635_HUMAN;A0A2R8YDN7_HUMAN;AT133_HUMAN	Isoform of Q9H7F0, ATPase 13A3;Isoform of Q9H7F0, ATPase 13A3;Polyamine-transporting ATPase 13A3	ATP13A3
160750	165849	162660	144209	168555	106795	165550	128397	155298	148607	111073	143624	151760	105666	139953	131071	143047	117983	52	50	58	59	49	52	51	51	56	54	48	54	52	41	56	46	50	54	P05023;P05023-4	P05023;P05023-4	Homo sapiens	AT1A1_HUMAN	Sodium/potassium-transporting ATPase subunit alpha-1;Isoform of P05023, Isoform 4 of Sodium/potassium-transporting ATPase subunit alpha-1	ATP1A1
12644.3	16662.4	11861.1	5759.52	8322.88	8998.15	11316.4	12858	7895.04	11893.7	9093.83	11541	18682.4	9187.94	11668.7	4958.56	10919.9	7401.53	5	5	6	5	4	6	5	5	5	5	4	5	6	3	3	3	4	5	B7Z9S8;P05026;P05026-2	B7Z9S8;P05026;P05026-2	Homo sapiens	B7Z9S8_HUMAN;AT1B1_HUMAN;AT1B1_HUMAN	Isoform of P05026, Sodium/potassium-transporting ATPase subunit beta;Sodium/potassium-transporting ATPase subunit beta-1;Isoform of P05026, Isoform 2 of Sodium/potassium-transporting ATPase subunit beta-1	ATP1B1
43248.3	39885.7	38409.3	36928.2	44806.3	25062.2	38804.8	24775.8	40244.1	35973.6	21441.9	33434.6	32872	27121.9	37948.5	28406	31963.8	29851	11	12	12	13	12	9	9	11	11	13	9	11	12	8	12	8	12	11	P54709	P54709	Homo sapiens	AT1B3_HUMAN	Sodium/potassium-transporting ATPase subunit beta-3	ATP1B3
80531	85279.9	86298	84725.3	92158.3	105894	107750	87238	101387	90531.6	102381	89044	92696.9	117573	85536.4	99924.2	113380	81282.1	38	36	44	45	42	41	40	41	40	42	33	42	39	25	45	34	41	40	P16615	P16615	Homo sapiens	AT2A2_HUMAN	Sarcoplasmic/endoplasmic reticulum calcium ATPase 2	ATP2A2
17824.7	9238.55	17490.5	14652.9	12939.3	16933.6	15467.9	11596.5	12334.8	11001.8	19472.8	16592.9	10138.1	26996.8	10481.1	21097.4	20953.8	16963.2	14	11	15	15	15	13	14	11	13	12	11	14	12	11	13	12	13	13	P20020;P20020-1;P20020-2;P20020-4;P20020-5;P20020-6	P20020;P20020-1;P20020-2;P20020-4;P20020-5;P20020-6	Homo sapiens	AT2B1_HUMAN	Plasma membrane calcium-transporting ATPase 1;Isoform of P20020, Isoform D of Plasma membrane calcium-transporting ATPase 1;Isoform of P20020, Isoform A of Plasma membrane calcium-transporting ATPase 1;Isoform of P20020, Isoform C of Plasma membrane calcium-transporting ATPase 1;Isoform of P20020, Isoform E of Plasma membrane calcium-transporting ATPase 1;Isoform of P20020, Isoform K of Plasma me…	ATP2B1
53136.9	67971.5	59312.9	58612.8	70624.4	62429.7	73050.4	59811.3	64103	60131.9	62219.8	65462.7	80583.4	44972.6	64074.4	64434.6	87524.5	44262.6	47	47	52	51	48	51	47	51	51	53	46	50	51	30	54	40	50	46	P23634;P23634-6;P23634-7;P23634-8	P23634;P23634-6;P23634-7;P23634-8	Homo sapiens	AT2B4_HUMAN	Plasma membrane calcium-transporting ATPase 4;Isoform of P23634, Isoform XB of Plasma membrane calcium-transporting ATPase 4;Isoform of P23634, Isoform ZB of Plasma membrane calcium-transporting ATPase 4;Isoform of P23634, Isoform ZD of Plasma membrane calcium-transporting ATPase 4	ATP2B4
4244.95	5627.83	5104.37	5202.03	7103.1	7434.07	9724.29	9194.87	8369.05	7484.47	4781.07	6685.14	4425.37	7451.67	7528.11	8938.13	7681.36	5157.49	5	5	6	6	4	7	5	5	5	7	2	6	5	2	6	2	3	5	B4E2Q0;H0Y9V7;P98194;P98194-2;P98194-3;P98194-4;P98194-5;P98194-6;P98194-7;P98194-8;P98194-9	B4E2Q0;H0Y9V7;P98194;P98194-2;P98194-3;P98194-4;P98194-5;P98194-6;P98194-7;P98194-8;P98194-9	Homo sapiens	B4E2Q0_HUMAN;H0Y9V7_HUMAN;AT2C1_HUMAN;AT2C1_HUMAN;AT2C1_HUMAN;AT2C1_HUMAN;AT2C1_HUMAN;AT2C1_HUMAN;AT2C1_HUMAN;AT2C1_HUMAN;AT2C1_HUMAN	Isoform of P98194, Calcium-transporting ATPase;Isoform of P98194, P-type Ca(2+) transporter (Fragment);Calcium-transporting ATPase type 2C member 1;Isoform of P98194, Isoform 2 of Calcium-transporting ATPase type 2C member 1;Isoform of P98194, Isoform 3 of Calcium-transporting ATPase type 2C member 1;Isoform of P98194, Isoform 4 of Calcium-transporting ATPase type 2C member 1;Isoform of P98194, I…	ATP2C1
321429	276856	276228	261068	316450	266846	350381	279816	275548	278692	261127	311807	340726	282824	304680	314049	400587	239815	51	49	49	49	48	46	48	49	50	47	42	49	49	40	48	44	49	46	P25705-2	P25705-2	Homo sapiens	ATPA_HUMAN	Isoform of P25705, Isoform 2 of ATP synthase subunit alpha, mitochondrial	ATP5F1A
284273	253273	277772	267911	279385	265306	326443	281180	286962	287466	263171	270600	315661	306221	280750	307213	410304	239335	46	45	50	49	48	48	48	45	45	47	43	45	47	43	45	42	47	44	P06576	P06576	Homo sapiens	ATPB_HUMAN	ATP synthase subunit beta, mitochondrial	ATP5F1B
2074.56	NaN	2154.79	1808.21	2466.71	869.514	3011.35	2032.21	2419.25	1679.72	2391.89	2175.84	NaN	NaN	NaN	1532.87	2028.55	2532.46	1	0	1	1	1	1	1	1	1	1	1	1	0	0	0	1	1	1	P36542	P36542	Homo sapiens	ATPG_HUMAN	ATP synthase subunit gamma, mitochondrial	ATP5F1C
62077.7	56411	50421.2	54578.8	62249.9	55495.8	84506.4	56179.8	63033.7	66180	63854.9	68576.8	74508.6	70394.5	65969.4	78885.4	91999.7	51978.7	3	3	3	3	3	3	3	3	3	3	3	3	3	2	3	3	3	3	P30049	P30049	Homo sapiens	ATPD_HUMAN	ATP synthase subunit delta, mitochondrial	ATP5F1D
NaN	NaN	3172.85	2647.95	1301.06	2924.5	NaN	2668.65	3378.9	1744.5	NaN	NaN	1579.12	NaN	NaN	NaN	3666.24	1312.88	0	0	1	1	1	1	0	1	1	1	0	0	1	0	0	0	1	1	P56381	P56381	Homo sapiens	ATP5E_HUMAN	ATP synthase subunit epsilon, mitochondrial	ATP5F1E
35776.1	26074.6	30127.1	25526.7	22999.9	23870.1	32728.3	25327.3	21089.5	24682	25702	27758.1	28294.9	14713	22728	29524.8	40677.2	13099.5	5	5	5	5	5	5	4	5	5	5	3	5	5	4	5	4	5	4	Q9UII2	Q9UII2	Homo sapiens	ATIF1_HUMAN	ATPase inhibitor, mitochondrial	ATP5IF1
58030.6	40315.7	49721.1	42298	52450	40039.6	65604.8	38972.4	43436	45086.8	32878.6	57635.3	64235.4	40410.7	38717.2	38707.9	48342.4	23548.2	2	2	2	2	2	2	2	2	2	2	2	2	2	2	2	2	2	2	D6R9H7;E7EPU7;E7EQ97;I3L0Y5;P05496;P48201;Q06055;Q06055-2;Q06055-3	D6R9H7;E7EPU7;E7EQ97;I3L0Y5;P05496;P48201;Q06055;Q06055-2;Q06055-3	Homo sapiens	D6R9H7_HUMAN;E7EPU7_HUMAN;E7EQ97_HUMAN;I3L0Y5_HUMAN;AT5G1_HUMAN;AT5G3_HUMAN;AT5G2_HUMAN;AT5G2_HUMAN;AT5G2_HUMAN	Isoform of P05496, ATP synthase membrane subunit c locus 1;Isoform of P05496, ATP synthase lipid-binding protein;Isoform of P05496, ATP synthase lipid-binding protein;Isoform of P05496, ATP synthase membrane subunit c locus 1 (Fragment);ATP synthase F(0) complex subunit C1, mitochondrial;ATP synthase F(0) complex subunit C3, mitochondrial;ATP synthase F(0) complex subunit C2, mitochondrial;Isofor…	ATP5MC1
22270.9	24829.3	19874.6	23180.2	28069	21040.1	30539.6	19089	27995.8	20871.3	23234.5	27752	27805.2	26800.4	22866.6	27538.4	35424.2	17998.4	5	5	5	4	4	4	5	4	5	5	5	5	5	4	5	5	4	5	P56385	P56385	Homo sapiens	ATP5I_HUMAN	ATP synthase subunit e, mitochondrial	ATP5ME
25216	17436	15529.2	18566.9	20011.1	13465.6	20380.8	14607.1	14536.3	16104.2	15170.3	18249.8	24304.2	13567.8	19437	20485.6	23930.5	14350.7	2	2	3	3	2	2	3	2	3	3	2	3	2	2	3	2	3	2	C9JJT5;G3V325;P56134-2;P56134-4	C9JJT5;G3V325;P56134-2;P56134-4	Homo sapiens	C9JJT5_HUMAN;G3V325_HUMAN;ATPK_HUMAN;ATPK_HUMAN	ATP5MF-PTCD1 readthrough, ATP synthase subunit f, mitochondrial;ATP5MF-PTCD1 readthrough, ATP5MF-PTCD1 readthrough;Isoform of P56134, Isoform 2 of ATP synthase subunit f, mitochondrial;Isoform of P56134, Isoform 4 of ATP synthase subunit f, mitochondrial	ATP5MF-PTCD1
72961.6	83589.3	59893.6	61480.8	84973.5	58965.1	83536.9	59863	87783.6	70469.4	59662	82708.9	82630.2	67100.1	77526.5	78876.1	84990	50911.5	6	6	7	7	7	6	7	7	6	7	7	7	7	4	7	5	7	6	A0A8I5KSW3	A0A8I5KSW3	Homo sapiens	A0A8I5KSW3_HUMAN	Isoform of O75964, ATP synthase membrane subunit g	ATP5MG
4147.07	6295.46	4026.08	4676.14	740.373	1312.15	NaN	2354.19	NaN	4538.46	NaN	2198.36	4225.56	NaN	3000.22	NaN	1796.71	1248.16	2	1	2	2	2	1	0	2	0	2	0	2	2	0	2	0	2	2	A0A0A0MTQ5;G3V556;P56378	A0A0A0MTQ5;G3V556;P56378	Homo sapiens	A0A0A0MTQ5_HUMAN;G3V556_HUMAN;ATP68_HUMAN	Isoform of P56378, ATP synthase membrane subunit j;Isoform of P56378, ATP synthase membrane subunit j;ATP synthase subunit ATP5MJ, mitochondrial	ATP5MJ
21525.3	26613.2	21649.9	19087	27124	24044.7	33303.1	26171.1	30643.1	21682.1	19999.7	22065.1	22672	28854.4	26211.3	22793.3	21482.4	14051.9	2	2	2	2	2	2	2	2	2	2	2	2	2	2	2	2	2	2	Q96IX5	Q96IX5	Homo sapiens	ATPMK_HUMAN	ATP synthase membrane subunit K, mitochondrial	ATP5MK
37359	34657.2	30738.4	29541.4	40361	32736.1	41826.5	32244.3	31814.7	33821.9	29402.8	37607.6	37777.9	33663.2	38213.1	38436.7	40978.3	25842	10	10	12	11	11	12	11	11	10	12	10	12	11	10	12	10	12	10	P24539;Q5QNZ2	P24539;Q5QNZ2	Homo sapiens	AT5F1_HUMAN;Q5QNZ2_HUMAN	ATP synthase F(0) complex subunit B1, mitochondrial;Isoform of P24539, ATP synthase subunit b	ATP5PB
44482.7	39940.9	39375.2	37879.5	44304.1	38475.3	52887.2	40677.2	39836.6	44559.3	43203.1	54324.5	48763.2	35952.1	48981.3	52874	58672.4	34415.8	11	11	15	13	10	11	12	12	12	13	12	14	13	7	16	10	13	10	O75947	O75947	Homo sapiens	ATP5H_HUMAN	ATP synthase subunit d, mitochondrial	ATP5PD
38400.4	29092.1	39183.5	40438.6	39429.6	28160.2	42906.9	29045.8	31939	39244.9	23810.2	33257.9	44369.1	19001	32698.1	30620	52392.6	30427.7	5	5	5	5	4	5	5	5	5	4	4	4	5	4	5	4	5	5	P18859;P18859-2	P18859;P18859-2	Homo sapiens	ATP5J_HUMAN	ATP synthase-coupling factor 6, mitochondrial;Isoform of P18859, Isoform 2 of ATP synthase-coupling factor 6, mitochondrial	ATP5PF
44420.4	43135.1	41565.1	38007.7	47449.9	37539.1	51216.5	38553.2	41189.7	39852.9	33196.6	40269.5	50722.5	33471.3	44272.5	39731.8	54843.4	29452.7	12	12	12	13	13	13	11	11	12	12	9	12	13	7	12	8	12	11	P48047	P48047	Homo sapiens	ATPO_HUMAN	ATP synthase subunit O, mitochondrial	ATP5PO
6511.96	6663.66	5465.91	5671.98	7706.51	7021.84	8681.24	5436.93	7466.26	6864.24	6038.31	7111.09	5853.35	7126	5752.41	7614.48	6105.99	6050.5	4	4	5	4	4	5	5	4	5	5	4	5	4	4	5	4	5	4	Q15904	Q15904	Homo sapiens	VAS1_HUMAN	V-type proton ATPase subunit S1	ATP6AP1
3551.45	2734.99	2281.31	2684.48	2966.71	2708.94	4178.94	2827.58	3662.75	2859.01	4033.56	2169.89	3379.39	4354.11	2813.77	2652	3519.92	2025.27	5	4	6	6	5	5	5	5	5	6	3	5	5	4	6	5	5	5	A0A1B0GVW0;O75787;O75787-2	A0A1B0GVW0;O75787;O75787-2	Homo sapiens	A0A1B0GVW0_HUMAN;RENR_HUMAN;RENR_HUMAN	Isoform of O75787, Renin receptor;Renin receptor;Isoform of O75787, Isoform 2 of Renin receptor	ATP6AP2
5890.25	8472.89	6922.06	5555.09	6377.07	6653.06	13511.1	4508.9	9753.73	5162.57	9142.02	5433.82	5608.96	4058.69	4583.39	14785.3	10628.1	5149.74	6	8	7	7	8	7	8	5	8	6	8	7	5	1	7	8	8	7	Q93050;Q93050-1;Q93050-3	Q93050;Q93050-1;Q93050-3	Homo sapiens	VPP1_HUMAN	V-type proton ATPase 116 kDa subunit a 1;Isoform of Q93050, Isoform 2 of V-type proton ATPase 116 kDa subunit a 1;Isoform of Q93050, Isoform 3 of V-type proton ATPase 116 kDa subunit a 1	ATP6V0A1
17052.2	23483.8	13614.4	12592.6	19571.1	23522	34128.4	17777.1	29367.9	11541.2	34025.6	20087.6	8910.05	15600.2	19761.4	36916.5	21979.2	16654.9	8	9	8	8	8	9	8	8	9	9	8	8	7	4	8	8	8	8	F5GYQ1;P61421	F5GYQ1;P61421	Homo sapiens	F5GYQ1_HUMAN;VA0D1_HUMAN	Isoform of P61421, V-type proton ATPase subunit;V-type proton ATPase subunit d 1	ATP6V0D1
3529.91	9302.23	5802.93	NaN	NaN	9663.74	10076.9	6743.6	12164.7	5148.58	12792.1	8393.07	NaN	NaN	4020.96	9396.15	7856.89	8846.69	1	1	1	0	0	1	1	1	1	1	1	1	0	0	1	1	1	1	Q8N8Y2	Q8N8Y2	Homo sapiens	VA0D2_HUMAN	V-type proton ATPase subunit d 2	ATP6V0D2
64492.9	60563.9	80104.4	71293.3	63676.3	90235	83323	63090.1	75912.8	50865.2	96428.4	57972.7	51520.1	62307	54912.2	121017	111707	62163.4	30	28	34	35	30	32	29	34	31	33	29	33	31	21	33	28	35	29	P38606;P38606-2	P38606;P38606-2	Homo sapiens	VATA_HUMAN	V-type proton ATPase catalytic subunit A;Isoform of P38606, Isoform 2 of V-type proton ATPase catalytic subunit A	ATP6V1A
40549.5	33430.2	45719.5	43450.6	38275.8	55244.7	46002.3	32660.7	38221.2	29239.7	58474.2	33405.6	27895.5	30790	30102.2	72760.8	66490.7	33547.1	19	18	19	20	18	19	19	19	19	18	17	19	20	12	19	17	20	19	P21281	P21281	Homo sapiens	VATB2_HUMAN	V-type proton ATPase subunit B, brain isoform	ATP6V1B2
8135.13	7139.36	9216.12	8373.22	9655.17	11213.6	9343.68	7352.47	9506.78	5884.33	10270.4	7156.62	5558.47	7787.05	7032.69	15529.4	8968.44	7352.05	14	15	16	16	14	16	12	11	14	16	12	14	14	10	15	14	13	13	P21283	P21283	Homo sapiens	VATC1_HUMAN	V-type proton ATPase subunit C 1	ATP6V1C1
6392.56	7407.73	6585.87	5143.66	6041.91	10839.5	12965.8	5850.6	8112.71	5153.14	13227.1	5529.02	4053.12	10428.8	4634.94	8185.19	9480.28	6014.76	4	5	6	6	6	7	7	4	6	4	5	6	3	4	6	5	6	7	G3V2S6;Q9Y5K8	G3V2S6;Q9Y5K8	Homo sapiens	G3V2S6_HUMAN;VATD_HUMAN	Isoform of Q9Y5K8, V-type proton ATPase subunit D;V-type proton ATPase subunit D	ATP6V1D
36898.9	30119.5	48475	45372.7	34085.1	59331.6	47785.2	38971.8	49944.6	29802.2	55998.8	25861.1	27918.7	37676.4	24824.1	70618.6	67736.5	37738.1	16	13	16	16	14	17	16	14	14	15	13	14	14	9	13	11	16	11	P36543	P36543	Homo sapiens	VATE1_HUMAN	V-type proton ATPase subunit E 1	ATP6V1E1
10133.6	7440.29	9316.89	8011.08	9131.93	9644.75	10414.1	6946.01	9345.77	6466.76	9884.47	8869.27	5886.85	7797.97	6911.28	13283.3	11445.2	7725.81	6	6	6	5	6	6	6	6	6	6	5	6	6	5	5	4	5	6	Q16864;Q16864-2	Q16864;Q16864-2	Homo sapiens	VATF_HUMAN	V-type proton ATPase subunit F;Isoform of Q16864, Isoform 2 of V-type proton ATPase subunit F	ATP6V1F
35288.5	27457	34360.3	34277.3	35398.7	40597.2	28945.9	35236.5	31671.1	23878.7	51130.7	28113.3	22040.2	20681	25443.1	68431.9	48598.2	24626.3	4	4	4	4	4	4	4	4	4	4	4	3	4	2	4	3	4	3	O75348	O75348	Homo sapiens	VATG1_HUMAN	V-type proton ATPase subunit G 1	ATP6V1G1
11183.5	12273.1	12675.2	10560.4	11034.8	16068.3	13189.9	10161.9	9551.12	8106.83	13888.9	9963.14	7070.27	9490	10498.1	21993.6	19258.4	9187.27	12	10	12	12	10	12	9	9	9	11	13	10	10	8	11	10	11	11	Q9UI12;Q9UI12-2	Q9UI12;Q9UI12-2	Homo sapiens	VATH_HUMAN	V-type proton ATPase subunit H;Isoform of Q9UI12, Isoform 2 of V-type proton ATPase subunit H	ATP6V1H
NaN	NaN	NaN	NaN	NaN	NaN	NaN	NaN	NaN	NaN	NaN	NaN	NaN	NaN	1586.46	NaN	NaN	NaN	0	0	0	0	0	0	0	0	0	0	0	0	0	0	1	0	0	0	A8MRA7;H0YD21;H0YEW4;I3L448;Q5TC12;Q5TC12-2;Q5TC12-3	A8MRA7;H0YD21;H0YEW4;I3L448;Q5TC12;Q5TC12-2;Q5TC12-3	Homo sapiens	A8MRA7_HUMAN;H0YD21_HUMAN;H0YEW4_HUMAN;I3L448_HUMAN;ATPF1_HUMAN;ATPF1_HUMAN;ATPF1_HUMAN	Isoform of Q5TC12, ATP synthase mitochondrial F1 complex assembly factor 1;Isoform of Q5TC12, ATP synthase mitochondrial F1 complex assembly factor 1 (Fragment);Isoform of Q5TC12, ATP synthase mitochondrial F1 complex assembly factor 1 (Fragment);Isoform of Q5TC12, ATP synthase mitochondrial F1 complex assembly factor 1;ATP synthase mitochondrial F1 complex assembly factor 1;Isoform of Q5TC12, Is…	ATPAF1
NaN	NaN	NaN	84.506	88.7519	NaN	NaN	78.528	NaN	41.0318	NaN	NaN	56.1401	NaN	NaN	NaN	NaN	NaN	0	0	0	1	1	0	0	1	0	1	0	0	1	0	0	0	0	0	A0A6Q8PHA4;P46100;P46100-2;P46100-3;P46100-4;P46100-5	A0A6Q8PHA4;P46100;P46100-2;P46100-3;P46100-4;P46100-5	Homo sapiens	A0A6Q8PHA4_HUMAN;ATRX_HUMAN;ATRX_HUMAN;ATRX_HUMAN;ATRX_HUMAN;ATRX_HUMAN	Isoform of P46100, ATRX chromatin remodeler;Transcriptional regulator ATRX;Isoform of P46100, Isoform 1 of Transcriptional regulator ATRX;Isoform of P46100, Isoform 2 of Transcriptional regulator ATRX;Isoform of P46100, Isoform 3 of Transcriptional regulator ATRX;Isoform of P46100, Isoform 5 of Transcriptional regulator ATRX	ATRX
18011.5	24731.9	21570.5	26351.2	24873.3	24504	22960.8	26178.9	27051.7	37627.9	22381.9	29277.8	25712.5	31932.1	27227.8	15955.8	23534.5	31624.6	12	16	17	17	15	16	15	15	15	17	12	15	14	12	15	11	14	17	Q9UBB4;Q9UBB4-2	Q9UBB4;Q9UBB4-2	Homo sapiens	ATX10_HUMAN	Ataxin-10;Isoform of Q9UBB4, Isoform 2 of Ataxin-10	ATXN10
5254.3	5919.29	4998.49	4927.92	5785.78	6060.52	5163.17	5780.58	5066.62	5817.75	5042.66	5878.69	5313.23	2507.23	5564.32	3218.83	4448.23	3856.46	6	9	9	10	9	7	7	9	6	9	5	8	8	2	7	4	7	8	A0A2R8Y5A6;A0A2R8YDM9	A0A2R8Y5A6;A0A2R8YDM9	Homo sapiens	A0A2R8Y5A6_HUMAN;A0A2R8YDM9_HUMAN	Isoform of Q99700, Ataxin 2;Isoform of Q99700, Ataxin 2	ATXN2
19834	17069.9	22535.1	18976.8	23178.4	20985.6	18983.8	20398.1	20106.9	20948.3	19033.2	20451.3	22813.3	22652.7	21895.5	21777.4	12904.8	20208.3	28	24	28	29	29	27	25	28	27	29	25	27	28	23	27	26	23	29	Q8WWM7	Q8WWM7	Homo sapiens	ATX2L_HUMAN	Ataxin-2-like protein	ATXN2L
1677.38	3624.71	2880.09	3215.15	1828.49	2238.43	1021.53	2446.83	2667.35	2461.83	2198	1382.16	2828.85	1974.35	1840.39	1370.91	2860.8	3244.86	2	1	2	2	2	2	1	2	1	2	1	2	2	1	2	1	1	2	A0A0A0MS38;A0A2R8Y3X7;E9PJN5;F5H211;G3V3R7;G3V4U9;G3V526;P54252;P54252-1;P54252-4	A0A0A0MS38;A0A2R8Y3X7;E9PJN5;F5H211;G3V3R7;G3V4U9;G3V526;P54252;P54252-1;P54252-4	Homo sapiens	A0A0A0MS38_HUMAN;A0A2R8Y3X7_HUMAN;E9PJN5_HUMAN;F5H211_HUMAN;G3V3R7_HUMAN;G3V4U9_HUMAN;G3V526_HUMAN;ATX3_HUMAN;ATX3_HUMAN;ATX3_HUMAN	Isoform of P54252, ubiquitinyl hydrolase 1;Isoform of P54252, ubiquitinyl hydrolase 1;Isoform of P54252, ubiquitinyl hydrolase 1 (Fragment);Isoform of P54252, ubiquitinyl hydrolase 1;Isoform of P54252, ubiquitinyl hydrolase 1 (Fragment);Isoform of P54252, ubiquitinyl hydrolase 1 (Fragment);Isoform of P54252, ubiquitinyl hydrolase 1;Ataxin-3;Isoform of P54252, Isoform 1 of Ataxin-3;Isoform of P542…	ATXN3
NaN	28872	9076.58	NaN	NaN	NaN	NaN	25599.3	24134	14473.1	36903.5	8903.19	17135.9	18481.3	25521.8	NaN	NaN	17067.7	0	1	1	0	0	0	0	1	1	1	1	1	1	1	1	0	0	1	Q9H3M9	Q9H3M9	Homo sapiens	ATX3L_HUMAN	Ataxin-3-like protein	ATXN3L
8183.9	9121.96	9002.22	10228.2	9707.38	8518.46	14965.6	9310.37	19469.7	4906.29	8680.55	8687.33	9501.31	6733.02	8374.43	NaN	7383.7	11433.6	1	1	1	1	1	1	1	1	1	1	1	1	1	1	1	0	1	1	Q96GX2	Q96GX2	Homo sapiens	A7L3B_HUMAN	Ataxin-7-like protein 3B	ATXN7L3B
12974.6	12973.6	9685.83	9357.46	14694.1	11653.3	16006.2	7095.85	15289.8	10683.3	10860	14980.6	7939.15	10864.2	10829	15633.3	6576.46	14134.9	8	7	8	8	8	7	8	7	7	8	7	8	7	6	7	7	5	8	Q9Y679	Q9Y679	Homo sapiens	AUP1_HUMAN	Lipid droplet-regulating VLDL assembly factor AUP1	AUP1
10228.2	10007.2	4212.63	1984.12	5597.76	4841.01	6340.54	6138.34	7645.77	4254.04	6762.11	6380.97	6002.81	8980.04	4409.71	6768.75	5115.81	3768.69	2	2	3	3	3	3	3	3	2	3	3	3	2	1	3	2	3	3	Q9NQS1	Q9NQS1	Homo sapiens	AVEN_HUMAN	Cell death regulator Aven	AVEN
3949.16	5154.81	5716.52	4397.63	6638.26	6276.3	5515.54	5166.74	7044.97	7444.82	4205.23	7954.65	8524.15	8297.37	8167.9	2740.54	1494.75	6029.2	5	5	5	6	4	7	5	7	7	7	4	6	6	4	7	3	3	5	P30530;P30530-2	P30530;P30530-2	Homo sapiens	UFO_HUMAN	Tyrosine-protein kinase receptor UFO;Isoform of P30530, Isoform Short of Tyrosine-protein kinase receptor UFO	AXL
40720.1	34882.8	40372.4	43008.1	26572.5	28002	25300.7	44693.4	30901.2	23860.8	29700.6	33598.1	41208.1	48620.8	45007.7	32502.1	71438.9	22157.4	7	6	9	9	8	9	8	9	8	9	6	7	8	5	8	6	8	8	P61769	P61769	Homo sapiens	B2MG_HUMAN	Beta-2-microglobulin	B2M
1610.25	1089.23	1589.92	1726.72	2376.4	2882	3672.02	2098.74	2720.81	1778.74	1948.03	2974.43	1211.49	NaN	1672.1	NaN	1666.95	1526.52	4	4	4	4	4	4	4	4	4	4	2	3	4	0	4	0	2	4	Q96L58	Q96L58	Homo sapiens	B3GT6_HUMAN	Beta-1,3-galactosyltransferase 6	B3GALT6
2674.3	2653.18	2444.91	1829.91	2725.91	1831.71	3439.36	2340.66	2283.33	2924.71	3422.43	2854.67	3033.14	824.021	3153.82	2337.37	2607.46	1213.76	3	3	5	5	4	4	3	3	4	4	3	5	4	1	4	2	3	3	O94766	O94766	Homo sapiens	B3GA3_HUMAN	Galactosylgalactosylxylosylprotein 3-beta-glucuronosyltransferase 3	B3GAT3
4525.86	5470.1	3590.08	4938.72	3957.86	3510.62	4616.6	4515.63	3872.39	4344.72	5854.92	4819.21	3891.73	2433.54	4351.01	2953.25	3470.62	4373.47	6	6	4	6	5	6	6	6	6	6	5	5	6	2	5	4	6	6	Q6Y288	Q6Y288	Homo sapiens	B3GLT_HUMAN	Beta-1,3-glucosyltransferase	B3GLCT
19656.9	19939.9	24310.8	19269.9	22042.7	12622.9	16803.4	16316.3	18651.6	17411.2	18368.3	22400.1	11753.2	21041.6	17477	13763	14650.6	15818.8	3	3	3	3	2	3	3	2	3	3	2	3	3	2	2	2	3	2	P15291;P15291-2	P15291;P15291-2	Homo sapiens	B4GT1_HUMAN	Beta-1,4-galactosyltransferase 1;Isoform of P15291, Isoform Short of Beta-1,4-galactosyltransferase 1	B4GALT1
601.462	NaN	1043.52	NaN	848.463	1565.58	NaN	NaN	1575.13	696.784	NaN	1570.27	962.108	NaN	1349.08	NaN	NaN	NaN	1	0	1	0	1	1	0	0	1	1	0	1	1	0	1	0	0	0	C9J3R8;O60513	C9J3R8;O60513	Homo sapiens	C9J3R8_HUMAN;B4GT4_HUMAN	Isoform of O60513, Beta-1,4-galactosyltransferase;Beta-1,4-galactosyltransferase 4	B4GALT4
2003.03	3393.84	2198.96	1945.54	2238.84	1800	4893.43	1296.27	1663.62	2265.03	1440.53	2183.77	1284.88	NaN	1966.23	896.862	1405.91	1570.45	1	2	2	2	2	2	2	1	2	2	1	1	1	0	1	1	1	1	D6RJI5;H0Y9D6;Q9UBV7	D6RJI5;H0Y9D6;Q9UBV7	Homo sapiens	D6RJI5_HUMAN;H0Y9D6_HUMAN;B4GT7_HUMAN	Isoform of Q9UBV7, Beta-1,4-galactosyltransferase 7;Isoform of Q9UBV7, Beta-1,4-galactosyltransferase 7 (Fragment);Beta-1,4-galactosyltransferase 7	B4GALT7
2794.34	3522	2840.54	3221.1	3685.31	2887.57	4581.6	2360.25	3348.2	3827.43	3766.37	4068.83	3073.84	9131.21	3695.57	3850.67	2268.33	4048.79	2	2	2	2	2	2	2	2	2	2	2	2	2	2	2	2	2	2	O43505	O43505	Homo sapiens	B4GA1_HUMAN	Beta-1,4-glucuronyltransferase 1	B4GAT1
5768.93	3961.15	6528.97	8387.2	5908.39	5147.76	5155.03	6247.44	4594.25	5066.36	5438.9	4781.52	6573.44	3398.63	3744.56	5040.6	5567.12	6307.11	3	3	4	4	4	4	4	5	4	4	3	3	3	1	3	2	3	4	M0R0I0;M0R193;M0R2A4;M0R2K3;M0R3F4;Q9NWV8	M0R0I0;M0R193;M0R2A4;M0R2K3;M0R3F4;Q9NWV8	Homo sapiens	M0R0I0_HUMAN;M0R193_HUMAN;M0R2A4_HUMAN;M0R2K3_HUMAN;M0R3F4_HUMAN;BABA1_HUMAN	Isoform of Q9NWV8, BRISC and BRCA1-A complex member 1 (Fragment);Isoform of Q9NWV8, BRISC and BRCA1-A complex member 1 (Fragment);Isoform of Q9NWV8, BRISC and BRCA1-A complex member 1 (Fragment);Isoform of Q9NWV8, BRISC and BRCA1-A complex member 1 (Fragment);Isoform of Q9NWV8, BRISC and BRCA1-A complex member 1 (Fragment);BRISC and BRCA1-A complex member 1	BABAM1
10802.6	8443.88	8758.85	8561.41	7360.21	5579.69	7274.19	8500.11	6427.52	5409.76	7331.98	6376.17	7326.39	8600.6	9341.65	11269.9	8124.96	6579.48	2	3	4	4	4	3	3	4	4	4	3	4	4	1	4	3	4	4	Q9NXR7	Q9NXR7	Homo sapiens	BABA2_HUMAN	BRISC and BRCA1-A complex member 2	BABAM2
5840.29	5926.28	6042.66	6159.62	6992.65	5983.05	5396.21	3840.48	4493.32	4036.36	7002.88	5119.55	6004.57	6488.32	6217.14	6132.64	7655.49	5212.72	2	2	2	2	2	2	2	2	2	2	2	2	2	2	2	2	2	2	Q92934	Q92934	Homo sapiens	BAD_HUMAN	Bcl2-associated agonist of cell death	BAD
39744.6	38897.7	34935.8	47378.9	51215.5	51470.7	60567.9	49871.7	40879.6	42805.1	43571.4	44322.4	51794.3	50385.4	42157	43257.9	91943	57263.8	18	16	19	18	17	18	17	18	18	17	15	16	17	11	16	16	17	17	O95816	O95816	Homo sapiens	BAG2_HUMAN	BAG family molecular chaperone regulator 2	BAG2
70303.9	81614.5	70294	62718.5	79826	72061	76435.8	65767	70702.6	66803.9	71668.4	73604.9	61916.7	63330.6	68814.2	60372.9	97653.4	76828.2	23	22	25	25	24	24	24	25	22	25	22	26	24	20	26	22	25	24	O95817	O95817	Homo sapiens	BAG3_HUMAN	BAG family molecular chaperone regulator 3	BAG3
3774.42	2487.91	4603.86	5309.74	3224.77	NaN	NaN	2982.08	4337.61	5420.07	NaN	NaN	6479.79	NaN	5562.96	NaN	NaN	2811.09	1	1	1	1	1	0	0	1	1	1	0	0	1	0	1	0	0	1	O95429;O95429-2	O95429;O95429-2	Homo sapiens	BAG4_HUMAN	BAG family molecular chaperone regulator 4;Isoform of O95429, Isoform 2 of BAG family molecular chaperone regulator 4	BAG4
7906.19	8899.33	9063.68	8203.63	8567.55	8138.15	6313.85	8014.67	8062.98	8400.07	8762.25	7334.24	8962.76	4924.11	7779.64	6895.74	8579.84	8159.39	7	7	7	5	5	4	5	7	6	6	5	5	8	3	7	6	6	4	Q9UL15;Q9UL15-2	Q9UL15;Q9UL15-2	Homo sapiens	BAG5_HUMAN	BAG family molecular chaperone regulator 5;Isoform of Q9UL15, Isoform 2 of BAG family molecular chaperone regulator 5	BAG5
12494.5	12664.3	13578.2	15244.1	14945.6	14873.2	13238.4	15026.1	14895.7	13731.3	13887	12166.7	14393.7	13473.4	12772.8	15422.1	10224.9	14836.9	18	16	19	21	18	19	16	18	19	21	16	17	20	13	19	11	17	17	A0A024RCR6;A0A0G2JK23;A0A7I2V508;A0A7P0MQS5;P46379;P46379-2;P46379-3	A0A024RCR6;A0A0G2JK23;A0A7I2V508;A0A7P0MQS5;P46379;P46379-2;P46379-3	Homo sapiens	A0A024RCR6_HUMAN;A0A0G2JK23_HUMAN;A0A7I2V508_HUMAN;A0A7P0MQS5_HUMAN;BAG6_HUMAN;BAG6_HUMAN;BAG6_HUMAN	Isoform of P46379, Large proline-rich protein BAG6;Isoform of P46379, Large proline-rich protein BAG6;Isoform of P46379, Large proline-rich protein BAG6;Isoform of P46379, Large proline-rich protein BAG6;Large proline-rich protein BAG6;Isoform of P46379, Isoform 2 of Large proline-rich protein BAG6;Isoform of P46379, Isoform 3 of Large proline-rich protein BAG6	BAG6
5692.42	6212.4	5506.57	6791.09	5693.33	5616.4	6846.48	12297.4	11364.4	13725.6	4082.56	12260	5357.5	3804.77	7367.38	2127.52	4465.58	5843.58	14	14	16	17	11	12	13	15	17	17	8	17	16	4	15	3	13	15	Q9UQB8;Q9UQB8-2;Q9UQB8-3;Q9UQB8-4;Q9UQB8-5;Q9UQB8-6	Q9UQB8;Q9UQB8-2;Q9UQB8-3;Q9UQB8-4;Q9UQB8-5;Q9UQB8-6	Homo sapiens	BAIP2_HUMAN	Brain-specific angiogenesis inhibitor 1-associated protein 2;Isoform of Q9UQB8, Isoform 2 of Brain-specific angiogenesis inhibitor 1-associated protein 2;Isoform of Q9UQB8, Isoform 3 of Brain-specific angiogenesis inhibitor 1-associated protein 2;Isoform of Q9UQB8, Isoform 4 of Brain-specific angiogenesis inhibitor 1-associated protein 2;Isoform of Q9UQB8, Isoform 5 of Brain-specific angiogenesis…	BAIAP2
18134.2	15952.4	12170.9	14485.8	14716.9	20591.7	9269.89	15971.6	7975.92	16632.3	15691.8	15689.2	17144.1	23333.2	16872.3	11211.7	9324.8	17273.7	3	3	3	5	3	3	3	3	3	4	2	3	3	2	4	2	3	3	O75531	O75531	Homo sapiens	BAF_HUMAN	Barrier-to-autointegration factor	BANF1
82040.2	69159.2	69814.2	65303.5	92592.2	61010.6	69903.4	52153.8	80459.1	43451.6	101229	59428.4	37735.2	55677.7	42769.5	121944	61831.5	74976.2	22	20	22	20	22	21	22	22	22	21	21	21	21	19	21	20	22	22	P80723	P80723	Homo sapiens	BASP1_HUMAN	Brain acid soluble protein 1	BASP1
29319.4	31691.4	35516.2	51306.3	28468	38972.9	26882.5	35292.2	32258.6	36459.3	32743.4	23386.5	34018.2	34975.6	29616.2	43009.3	33593.5	29917.8	8	8	8	8	7	8	7	8	8	8	7	7	8	7	8	8	8	8	Q07812;Q07812-2;Q07812-5;Q07812-8	Q07812;Q07812-2;Q07812-5;Q07812-8	Homo sapiens	BAX_HUMAN	Apoptosis regulator BAX;Isoform of Q07812, Isoform Beta of Apoptosis regulator BAX;Isoform of Q07812, Isoform Epsilon of Apoptosis regulator BAX;Isoform of Q07812, Isoform Sigma of Apoptosis regulator BAX	BAX
9501.57	7881.36	9360.45	10401.9	11034.8	10415.4	4341.67	7840.86	7722.57	9207.92	12009.3	10335.9	8159.21	6616.85	7897.95	34.5021	NaN	7900.73	4	3	4	4	3	4	3	4	4	4	4	4	3	4	4	2	0	4	Q9UIG0;Q9UIG0-2	Q9UIG0;Q9UIG0-2	Homo sapiens	BAZ1B_HUMAN	Tyrosine-protein kinase BAZ1B;Isoform of Q9UIG0, Isoform 2 of Tyrosine-protein kinase BAZ1B	BAZ1B
6616.07	NaN	1946.17	1829.37	918.319	NaN	NaN	NaN	NaN	1399.91	NaN	NaN	7483.3	NaN	NaN	NaN	NaN	NaN	1	0	1	1	1	0	0	0	0	1	0	0	1	0	0	0	0	0	A0A087WXM8;K7ENU8;P50895	A0A087WXM8;K7ENU8;P50895	Homo sapiens	A0A087WXM8_HUMAN;K7ENU8_HUMAN;BCAM_HUMAN	Isoform of P50895, Basal cell adhesion molecule (Lutheran blood group);Isoform of P50895, Basal cell adhesion molecule (Lutheran blood group) (Fragment);Basal cell adhesion molecule	BCAM
43268.6	44579.3	38840.8	38961.6	40597.6	40079	59409.6	30130.5	38290.9	46779.1	35007.3	40688.1	32567.8	29072.4	33495.7	46056.2	49623.1	29591.1	22	22	23	24	22	22	21	21	23	24	20	22	23	17	24	20	22	21	P51572;P51572-2	P51572;P51572-2	Homo sapiens	BAP31_HUMAN	B-cell receptor-associated protein 31;Isoform of P51572, Isoform 2 of B-cell receptor-associated protein 31	BCAP31
5734.95	7825.28	7330.05	7070.52	7283.36	13044.3	9262.66	13341.7	10517.5	7127.98	11277.3	10905.6	5620.37	13748.1	8587.85	12079.9	10928.5	8524.68	9	9	12	12	12	12	10	12	12	12	11	12	11	9	11	9	12	12	A0A2R8Y4C2;A0A2R8Y596;A0A2R8Y5C9;A0A2R8Y6M6;A0A2R8Y8C4;A0A2R8YFK2;A0A2R8YFS8;P56945;P56945-2;P56945-3;P56945-5;P56945-6;P56945-7;P56945-8	A0A2R8Y4C2;A0A2R8Y596;A0A2R8Y5C9;A0A2R8Y6M6;A0A2R8Y8C4;A0A2R8YFK2;A0A2R8YFS8;P56945;P56945-2;P56945-3;P56945-5;P56945-6;P56945-7;P56945-8	Homo sapiens	A0A2R8Y4C2_HUMAN;A0A2R8Y596_HUMAN;A0A2R8Y5C9_HUMAN;A0A2R8Y6M6_HUMAN;A0A2R8Y8C4_HUMAN;A0A2R8YFK2_HUMAN;A0A2R8YFS8_HUMAN;BCAR1_HUMAN;BCAR1_HUMAN;BCAR1_HUMAN;BCAR1_HUMAN;BCAR1_HUMAN;BCAR1_HUMAN;BCAR1_HUMAN	Isoform of P56945, Breast cancer anti-estrogen resistance protein 1;Isoform of P56945, Breast cancer anti-estrogen resistance protein 1;Isoform of P56945, Breast cancer anti-estrogen resistance protein 1;Isoform of P56945, Breast cancer anti-estrogen resistance protein 1;Isoform of P56945, Breast cancer anti-estrogen resistance protein 1;Isoform of P56945, Breast cancer anti-estrogen resistance p…	BCAR1
3370.51	4868.16	3295.19	4578.09	3793.27	8162.89	5464.84	3499.91	5403.69	5277.51	5900.01	8792.09	2330.12	8882.26	4376.91	8219.16	3310.86	5535.25	5	9	9	10	8	10	7	8	8	10	7	10	6	6	10	4	9	10	O75815	O75815	Homo sapiens	BCAR3_HUMAN	Breast cancer anti-estrogen resistance protein 3	BCAR3
11536.7	16641.3	7084.5	8450.43	13249.4	5984.04	4308.03	10494.7	12544	8592.3	8326.85	7235.72	11570.5	13250.3	7749.63	8273.32	6047.8	5822.85	3	2	3	3	3	2	1	4	2	3	2	3	3	2	4	2	2	3	O75934	O75934	Homo sapiens	SPF27_HUMAN	Pre-mRNA-splicing factor SPF27	BCAS2
4203.21	3625.58	2688.28	4520.18	4177.76	3689.81	3977.34	3604.13	2952.53	4066.13	4241.26	3369.64	5510.66	4565.24	3640.99	7456.64	4524.36	4143.08	4	4	4	4	3	4	3	3	3	3	2	3	4	1	3	1	4	3	Q9H6U6;Q9H6U6-2;Q9H6U6-3;Q9H6U6-7;Q9H6U6-8	Q9H6U6;Q9H6U6-2;Q9H6U6-3;Q9H6U6-7;Q9H6U6-8	Homo sapiens	BCAS3_HUMAN	BCAS3 microtubule associated cell migration factor;Isoform of Q9H6U6, Isoform 1 of BCAS3 microtubule associated cell migration factor;Isoform of Q9H6U6, Isoform 3 of BCAS3 microtubule associated cell migration factor;Isoform of Q9H6U6, Isoform 5 of BCAS3 microtubule associated cell migration factor;Isoform of Q9H6U6, Isoform 4 of BCAS3 microtubule associated cell migration factor	BCAS3
21739.4	20229.9	31787.3	18065	30244.6	11000.4	16910	20564.4	35178	29169.9	8768.56	24414.1	13474.6	39529.4	28130.7	2459.57	18219.1	22640.8	9	9	10	10	9	9	9	9	10	10	7	9	9	9	9	4	9	10	P54687;P54687-4;P54687-5	P54687;P54687-4;P54687-5	Homo sapiens	BCAT1_HUMAN	Branched-chain-amino-acid aminotransferase, cytosolic;Isoform of P54687, Isoform 4 of Branched-chain-amino-acid aminotransferase, cytosolic;Isoform of P54687, Isoform 5 of Branched-chain-amino-acid aminotransferase, cytosolic	BCAT1
3120.87	4176.23	4834.61	6520.32	2915.92	4049.29	5814.26	NaN	2445.91	4304.98	2813.68	1667.84	3538.78	2198.23	999.516	1584.38	4708.72	2038.21	2	1	2	2	2	2	1	0	1	1	1	2	2	1	2	1	1	1	B3KSI3;M0QXF9;M0QZ10;M0QZP4;O15382;O15382-2	B3KSI3;M0QXF9;M0QZ10;M0QZP4;O15382;O15382-2	Homo sapiens	B3KSI3_HUMAN;M0QXF9_HUMAN;M0QZ10_HUMAN;M0QZP4_HUMAN;BCAT2_HUMAN;BCAT2_HUMAN	Isoform of O15382, Branched-chain-amino-acid aminotransferase;Isoform of O15382, Branched-chain-amino-acid aminotransferase (Fragment);Isoform of O15382, Branched-chain-amino-acid aminotransferase;Isoform of O15382, Branched-chain-amino-acid aminotransferase;Branched-chain-amino-acid aminotransferase, mitochondrial;Isoform of O15382, Isoform B of Branched-chain-amino-acid aminotransferase, mitoch…	BCAT2
12948.5	8796.89	10328.2	10818.7	11598.8	11536	7200.77	10019.9	12757.2	12624.6	7159.66	10377	10505	10994.6	8454.21	8034.8	5225.66	9600.67	6	5	5	5	5	4	4	5	5	5	4	4	4	4	6	4	5	5	Q9P287;Q9P287-2;Q9P287-3;Q9P287-4	Q9P287;Q9P287-2;Q9P287-3;Q9P287-4	Homo sapiens	BCCIP_HUMAN	BRCA2 and CDKN1A-interacting protein;Isoform of Q9P287, Isoform 2 of BRCA2 and CDKN1A-interacting protein;Isoform of Q9P287, Isoform 3 of BRCA2 and CDKN1A-interacting protein;Isoform of Q9P287, Isoform 4 of BRCA2 and CDKN1A-interacting protein	BCCIP
7987.01	7945.75	8258.56	14318.8	9959.47	6389.7	9865.25	6279.06	6255.65	9890.34	1187.21	7012.52	8460.71	5130.57	8025.94	6144.79	6275.07	5077.14	6	6	6	6	6	6	4	4	4	6	2	5	6	2	5	2	6	5	F5H5P2;P12694;P12694-2	F5H5P2;P12694;P12694-2	Homo sapiens	F5H5P2_HUMAN;ODBA_HUMAN;ODBA_HUMAN	readthrough, 2-oxoisovalerate dehydrogenase subunit alpha;2-oxoisovalerate dehydrogenase subunit alpha, mitochondrial;Isoform of P12694, Isoform 2 of 2-oxoisovalerate dehydrogenase subunit alpha, mitochondrial	BCKDHA
686.776	NaN	NaN	NaN	NaN	NaN	NaN	NaN	NaN	663.523	NaN	NaN	520.514	NaN	NaN	NaN	NaN	NaN	1	0	0	0	0	0	0	0	0	1	0	0	1	0	0	0	0	0	P21953;P21953-2	P21953;P21953-2	Homo sapiens	ODBB_HUMAN	2-oxoisovalerate dehydrogenase subunit beta, mitochondrial;Isoform of P21953, Isoform 2 of 2-oxoisovalerate dehydrogenase subunit beta, mitochondrial	BCKDHB
80361.9	19560.6	4023.98	5906.2	20491.1	3295.93	6085.2	8290.89	15870.2	3730.92	5330.38	4813.69	16305.7	3335.42	8579.15	4658.38	7265.97	1622.18	2	2	2	2	2	2	2	1	2	2	1	2	2	1	1	1	1	2	H3BS02;H3BTL2;O14874;O14874-2;O14874-3	H3BS02;H3BTL2;O14874;O14874-2;O14874-3	Homo sapiens	H3BS02_HUMAN;H3BTL2_HUMAN;BCKD_HUMAN;BCKD_HUMAN;BCKD_HUMAN	Isoform of O14874, Protein-serine/threonine kinase;Isoform of O14874, Protein-serine/threonine kinase (Fragment);[3-methyl-2-oxobutanoate dehydrogenase [lipoamide]] kinase, mitochondrial;Isoform of O14874, Isoform 2 of [3-methyl-2-oxobutanoate dehydrogenase [lipoamide]] kinase, mitochondrial;Isoform of O14874, Isoform 3 of [3-methyl-2-oxobutanoate dehydrogenase [lipoamide]] kinase, mitochondrial	BCKDK
6227.68	8107.93	6411.2	5228.8	6252.86	6963.09	6826.44	8096.03	7744.53	8371.6	9136.4	7908.86	9230.71	9589.37	6374.21	6676.83	6126.44	7604.2	4	4	4	4	4	4	4	4	4	4	4	4	4	4	4	3	4	4	A0A087WWW9;O95999	A0A087WWW9;O95999	Homo sapiens	A0A087WWW9_HUMAN;BCL10_HUMAN	Isoform of O95999, BCL10 immune signaling adaptor;B-cell lymphoma/leukemia 10	BCL10
3728.96	3613.14	4196.37	4454.6	2974.82	4804.93	5448.84	3707.11	3841.28	2381.95	5604.2	4910.04	5657.34	3561.24	4350.96	8072.92	6357.09	2959.7	3	3	3	3	3	3	3	3	3	3	3	3	3	1	3	3	3	3	A0A7I2V597;Q07817;Q07817-3;Q5QP56;Q5TE64;Q9H1R6	A0A7I2V597;Q07817;Q07817-3;Q5QP56;Q5TE64;Q9H1R6	Homo sapiens	A0A7I2V597_HUMAN;B2CL1_HUMAN;B2CL1_HUMAN;Q5QP56_HUMAN;Q5TE64_HUMAN;Q9H1R6_HUMAN	Isoform of Q07817, Bcl-2-like protein 1;Bcl-2-like protein 1;Isoform of Q07817, Isoform Bcl-X(beta) of Bcl-2-like protein 1;Isoform of Q07817, Bcl-2-like protein 1 (Fragment);Isoform of Q07817, Bcl-2-like protein 1;Isoform of Q07817, Bcl-2-like protein 1 (Fragment)	BCL2L1
6239.38	6915.66	6363.19	6920.51	4729.08	5595.41	9905.34	5503.71	6908.22	5820.12	6835.96	5854.76	7461.19	4915.41	5799.48	8659.38	14184.5	4446.93	7	7	9	9	8	7	7	8	8	8	5	6	9	4	8	5	9	7	A0A087WX97;Q9BXK5	A0A087WX97;Q9BXK5	Homo sapiens	A0A087WX97_HUMAN;B2L13_HUMAN	Isoform of Q9BXK5, BCL2 like 13;Bcl-2-like protein 13	BCL2L13
994.439	1911.1	1646.19	2284.95	1868.27	1804.21	1804.21	1061.81	NaN	1157.14	NaN	NaN	1609.26	NaN	1365.99	NaN	1892.85	2174.49	1	1	1	1	1	1	1	1	0	1	0	0	1	0	1	0	1	1	A0A7I2V383;Q92843-2	A0A7I2V383;Q92843-2	Homo sapiens	A0A7I2V383_HUMAN;B2CL2_HUMAN	Isoform of Q92843, BCL2L2-PABPN1 readthrough;Isoform of Q92843, Isoform 3 of Bcl-2-like protein 2	BCL2L2-PABPN1
19550.6	13418.4	14249.1	18254	16628.4	13807.6	8977.1	15038.2	12962.5	12128.2	11367.4	16357.2	14847	16101.8	13718	10984.6	5654.23	15511.4	19	21	22	21	20	22	18	21	20	23	18	23	20	14	21	15	16	21	Q9NYF8;Q9NYF8-2	Q9NYF8;Q9NYF8-2	Homo sapiens	BCLF1_HUMAN	Bcl-2-associated transcription factor 1;Isoform of Q9NYF8, Isoform 2 of Bcl-2-associated transcription factor 1	BCLAF1
NaN	453.485	515.607	1528.97	NaN	149.338	NaN	996.345	451.988	1186.4	NaN	NaN	655.94	NaN	NaN	NaN	NaN	NaN	0	1	1	1	0	1	0	1	1	1	0	0	1	0	0	0	0	0	H3BPA2;H3BV18;Q9HAY6	H3BPA2;H3BV18;Q9HAY6	Homo sapiens	H3BPA2_HUMAN;H3BV18_HUMAN;BCDO1_HUMAN	Isoform of Q9HAY6, Beta-carotene oxygenase 1;Isoform of Q9HAY6, Beta-carotene oxygenase 1;Beta,beta-carotene 15,15'-dioxygenase	BCO1
NaN	NaN	2709.52	2172.45	2770.01	1721.87	NaN	NaN	NaN	2482.82	NaN	NaN	2772.82	NaN	NaN	NaN	NaN	NaN	0	0	1	1	1	1	0	0	0	1	0	0	1	0	0	0	0	0	H0Y554;P11274;P11274-2	H0Y554;P11274;P11274-2	Homo sapiens	H0Y554_HUMAN;BCR_HUMAN;BCR_HUMAN	Isoform of P11274, BCR activator of RhoGEF and GTPase (Fragment);Breakpoint cluster region protein;Isoform of P11274, Isoform 2 of Breakpoint cluster region protein	BCR
3544.97	3360.55	3203.72	4272.29	4543.35	2734.58	3907.55	3870.9	3739.09	4163.7	1651.49	3053.5	4250.33	3661.23	3766.73	4863.5	4050.35	2460.09	7	5	7	7	6	7	6	6	5	7	5	7	7	4	7	5	7	6	Q9Y276	Q9Y276	Homo sapiens	BCS1_HUMAN	Mitochondrial chaperone BCS1	BCS1L
11335.9	15801	10752.4	13471	13049.6	10136.8	11324.6	11130.3	9112.48	10411.2	19277.3	9482	8209.71	748.664	8393.52	9068.36	17553.5	7122.57	4	4	3	4	3	3	3	3	4	2	3	2	3	2	3	3	4	3	Q9BUT1	Q9BUT1	Homo sapiens	DHRS6_HUMAN	Dehydrogenase/reductase SDR family member 6	BDH2
9618.1	24820.2	1806.76	NaN	11272.4	NaN	2924.6	5285.26	4822.29	NaN	9366.39	NaN	24249.9	7474.32	4103.18	2820.03	3051.2	NaN	2	2	1	0	2	0	1	2	2	0	2	0	2	1	1	2	2	0	A0A0G2JNU3;A6H8Y1;A6H8Y1-2;A6H8Y1-6;A6H8Y1-7	A0A0G2JNU3;A6H8Y1;A6H8Y1-2;A6H8Y1-6;A6H8Y1-7	Homo sapiens	A0A0G2JNU3_HUMAN;BDP1_HUMAN;BDP1_HUMAN;BDP1_HUMAN;BDP1_HUMAN	Isoform of A6H8Y1, Transcription factor TFIIIB component B'' homolog;Transcription factor TFIIIB component B'' homolog;Isoform of A6H8Y1, Isoform 2 of Transcription factor TFIIIB component B'' homolog;Isoform of A6H8Y1, Isoform 6 of Transcription factor TFIIIB component B'' homolog;Isoform of A6H8Y1, Isoform 7 of Transcription factor TFIIIB component B'' homolog	BDP1
3744.96	1930.38	2440.94	3204.49	2359.21	3130.57	2768.42	2426.31	NaN	2866.21	3661.57	4599.86	3148.59	NaN	3232.27	6016.07	2771.1	3002.41	1	1	1	1	1	1	1	1	0	1	1	1	1	0	1	1	1	1	E7EV84;K7ELY9;Q14457	E7EV84;K7ELY9;Q14457	Homo sapiens	E7EV84_HUMAN;K7ELY9_HUMAN;BECN1_HUMAN	Isoform of Q14457, Beclin 1;Isoform of Q14457, Beclin 1 (Fragment);Beclin-1	BECN1
8243.75	4513.05	4659.75	7894.21	5614.08	6223.62	8624.41	3703.36	3464.56	4569.64	4428.31	4465.71	4879.55	4673.85	4196.58	5096.84	5098.34	3179.07	2	2	2	2	2	2	2	2	2	2	1	1	2	2	2	1	2	2	H7C1N3;O15155	H7C1N3;O15155	Homo sapiens	H7C1N3_HUMAN;BET1_HUMAN	Isoform of O15155, Bet1 golgi vesicular membrane trafficking protein (Fragment);BET1 homolog	BET1
2490.11	2209.75	3329.07	4330.13	5523.38	2055	4221.87	2372.34	3172.6	2437.02	2558.22	2424.57	2640.59	6172.92	2874.68	1705.39	1328.23	3793.71	1	2	3	3	2	3	3	2	2	3	1	3	1	1	3	1	1	2	A0A0C4DH16;B8ZZS0;H7BXT7;Q9NYM9	A0A0C4DH16;B8ZZS0;H7BXT7;Q9NYM9	Homo sapiens	A0A0C4DH16_HUMAN;B8ZZS0_HUMAN;H7BXT7_HUMAN;BET1L_HUMAN	Isoform of Q9NYM9, Bet1 golgi vesicular membrane trafficking protein like;Isoform of Q9NYM9, Bet1 golgi vesicular membrane trafficking protein like;Isoform of Q9NYM9, Bet1 golgi vesicular membrane trafficking protein like;BET1-like protein	BET1L
14099.7	5443.44	6488.97	6264.94	12597	2492.27	5134.27	11480.6	5738.81	8782.48	3632.56	5311.03	3014.69	6407.08	5991.49	72.5734	5572.02	6178.83	6	6	6	6	6	6	5	6	6	6	5	5	5	3	6	2	6	6	P21810	P21810	Homo sapiens	PGS1_HUMAN	Biglycan	BGN
5348.54	4304.35	3988.1	5641.05	3410.12	2122.4	1726.16	2145.72	1052.64	2664.02	3425.33	2532.48	4365.22	716.898	2779.05	2824.12	2320.02	2410.47	6	5	6	6	6	5	1	6	5	5	3	5	7	1	6	3	5	5	Q9H694	Q9H694	Homo sapiens	BICC1_HUMAN	Protein bicaudal C homolog 1	BICC1
5808.72	7314.71	7935.46	5821.65	7057.27	7870.59	8062.8	8308.68	9228.07	8401.84	8065.91	8990.45	6803.26	9956.34	8295.83	6722.6	4916.46	9135.78	17	19	20	21	20	21	20	20	19	21	17	22	19	14	21	15	19	19	Q8TD16;Q8TD16-2	Q8TD16;Q8TD16-2	Homo sapiens	BICD2_HUMAN	Protein bicaudal D homolog 2;Isoform of Q8TD16, Isoform 2 of Protein bicaudal D homolog 2	BICD2
8897.62	4060.97	6044.88	8358.15	6401.53	8901.33	7851.07	10699.3	6072.13	5962.15	5700.26	6833.49	6175.88	8172.41	5082.3	5292.77	16164	5851.87	9	9	9	9	10	9	9	9	8	10	6	9	9	6	9	5	10	9	P55957;P55957-2	P55957;P55957-2	Homo sapiens	BID_HUMAN	BH3-interacting domain death agonist;Isoform of P55957, Isoform 2 of BH3-interacting domain death agonist	BID
8490.31	8731.21	8536.82	8625.13	7297.07	8120.09	9145.63	6788.62	4950.96	4437.84	6489.26	3804.42	9593.55	7973.82	6150.56	5647.08	7104.11	6358.26	9	9	11	11	10	10	7	7	7	10	8	9	9	4	10	4	8	9	O00499;O00499-10;O00499-11;O00499-2;O00499-3;O00499-4;O00499-5;O00499-6;O00499-7;O00499-8;O00499-9	O00499;O00499-10;O00499-11;O00499-2;O00499-3;O00499-4;O00499-5;O00499-6;O00499-7;O00499-8;O00499-9	Homo sapiens	BIN1_HUMAN	Myc box-dependent-interacting protein 1;Isoform of O00499, Isoform BIN1-13 of Myc box-dependent-interacting protein 1;Isoform of O00499, Isoform BIN1+12A of Myc box-dependent-interacting protein 1;Isoform of O00499, Isoform IIB of Myc box-dependent-interacting protein 1;Isoform of O00499, Isoform IIC1 of Myc box-dependent-interacting protein 1;Isoform of O00499, Isoform IIC2 of Myc box-dependent-…	BIN1
4526.07	5140.77	3513.39	3403.52	4659.74	2493.99	4608.78	5639.53	2922.13	2936.55	6583.86	3529.65	3509.28	63867.8	4100.6	NaN	2026.17	4394.88	4	4	4	5	4	4	2	4	4	5	1	5	5	1	4	0	4	3	Q9NQY0	Q9NQY0	Homo sapiens	BIN3_HUMAN	Bridging integrator 3	BIN3
NaN	401.396	577.409	NaN	563.136	1141.08	NaN	1042.07	1498.03	NaN	NaN	1118.62	419.186	2212.64	1873.78	NaN	NaN	683.219	0	1	1	0	1	1	0	1	1	0	0	1	1	1	1	0	0	1	A0A669KBC7;E9PI77;E9PIW1;E9PMH5;H0YCJ5;Q13489;Q13490;Q13490-2	A0A669KBC7;E9PI77;E9PIW1;E9PMH5;H0YCJ5;Q13489;Q13490;Q13490-2	Homo sapiens	A0A669KBC7_HUMAN;E9PI77_HUMAN;E9PIW1_HUMAN;E9PMH5_HUMAN;H0YCJ5_HUMAN;BIRC3_HUMAN;BIRC2_HUMAN;BIRC2_HUMAN	Isoform of Q13489, Baculoviral IAP repeat containing 3;Isoform of Q13490, Baculoviral IAP repeat containing 2 (Fragment);Isoform of Q13490, Baculoviral IAP repeat containing 2 (Fragment);Isoform of Q13490, Baculoviral IAP repeat containing 2;Isoform of Q13489, Baculoviral IAP repeat containing 3 (Fragment);Baculoviral IAP repeat-containing protein 3;Baculoviral IAP repeat-containing protein 2;Iso…	BIRC3
2565.66	4073.42	4377.53	3473.3	3575.53	3385.69	3775.49	3403.25	3212.74	3370.53	2418.3	2447.33	2293.8	4701.17	2473.16	3100.86	2702.53	2639.89	7	5	5	7	6	7	4	5	6	7	5	7	5	3	6	1	6	6	A0A8V8TQB4;A0A8V8TR92;Q9NR09	A0A8V8TQB4;A0A8V8TR92;Q9NR09	Homo sapiens	A0A8V8TQB4_HUMAN;A0A8V8TR92_HUMAN;BIRC6_HUMAN	Isoform of Q9NR09, Baculoviral IAP repeat containing 6;Isoform of Q9NR09, Baculoviral IAP repeat containing 6;Baculoviral IAP repeat-containing protein 6	BIRC6
30751.3	23987.5	23096.1	26699.9	22980.3	19435.6	14242.8	20871.5	19267.7	18720.9	14166.6	19785.9	20021.5	10032.4	18449.5	11502.8	17349.8	17345.4	5	5	5	5	4	5	5	5	5	5	4	5	5	4	5	4	5	5	J3KSD8;K7ESE8;Q13867	J3KSD8;K7ESE8;Q13867	Homo sapiens	J3KSD8_HUMAN;K7ESE8_HUMAN;BLMH_HUMAN	Isoform of Q13867, Bleomycin hydrolase (Fragment);Isoform of Q13867, Bleomycin hydrolase (Fragment);Bleomycin hydrolase	BLMH
5535.09	3178.16	2236.69	4493.97	5710.3	5349.19	3145.67	4630.54	3451.92	4661.96	4939.16	4019.95	3527.08	NaN	2752.32	NaN	4220.37	3950.89	2	2	2	2	2	2	2	2	2	2	2	2	2	0	2	0	2	2	G8JLQ3;P78537;P78537-2	G8JLQ3;P78537;P78537-2	Homo sapiens	G8JLQ3_HUMAN;BL1S1_HUMAN;BL1S1_HUMAN	Isoform of P78537, Biogenesis of lysosome-related organelles complex 1 subunit 1;Biogenesis of lysosome-related organelles complex 1 subunit 1;Isoform of P78537, Isoform 2 of Biogenesis of lysosome-related organelles complex 1 subunit 1	BLOC1S1
3424.98	1765.98	4514.32	3950.22	4064.67	3614.79	3794.84	3082.9	1939.32	2809.18	NaN	4010.58	3299.42	7374.06	2093.04	8011.1	3340.38	5282.56	2	2	2	2	2	2	2	2	2	2	0	2	2	1	2	1	2	1	Q6QNY1	Q6QNY1	Homo sapiens	BL1S2_HUMAN	Biogenesis of lysosome-related organelles complex 1 subunit 2	BLOC1S2
3779.81	3218.59	3966.31	4401.58	3743.95	3548.52	2423.53	3745.76	2652.46	3741.5	3734.69	3151.93	3096.53	2420.73	3449.63	3436.73	3132.98	4384.1	4	4	4	4	4	3	3	3	2	4	2	4	4	1	4	3	4	3	Q6QNY0	Q6QNY0	Homo sapiens	BL1S3_HUMAN	Biogenesis of lysosome-related organelles complex 1 subunit 3	BLOC1S3
6557.15	4781.79	5800.58	5324.25	5260	5617.11	4993.15	5797.57	5264.97	5951.32	4291.19	4999.6	4752.34	4801.08	1737.97	5265.11	6116.06	4610.86	1	1	1	1	1	1	1	1	1	1	1	1	1	1	1	1	1	1	Q9NUP1	Q9NUP1	Homo sapiens	BL1S4_HUMAN	Biogenesis of lysosome-related organelles complex 1 subunit 4	BLOC1S4
5576.35	1959.51	4634.57	5226.86	5718.09	3935.18	5184.43	5840.27	2657.61	6353.87	4010.93	4960.12	5550.06	1311.05	4196.35	3144.82	5000.52	4597.69	1	1	1	1	1	1	1	1	1	1	1	1	1	1	1	1	1	1	G5E931;H3BN57;Q8TDH9;Q8TDH9-2;Q8TDH9-3	G5E931;H3BN57;Q8TDH9;Q8TDH9-2;Q8TDH9-3	Homo sapiens	G5E931_HUMAN;H3BN57_HUMAN;BL1S5_HUMAN;BL1S5_HUMAN;BL1S5_HUMAN	Isoform of Q8TDH9, Biogenesis of lysosome-related organelles complex 1 subunit 5;BLOC1S5-TXNDC5 readthrough, Biogenesis of lysosome-related organelles complex 1 subunit 5 (Fragment);Biogenesis of lysosome-related organelles complex 1 subunit 5;Isoform of Q8TDH9, Isoform 2 of Biogenesis of lysosome-related organelles complex 1 subunit 5;Isoform of Q8TDH9, Isoform 3 of Biogenesis of lysosome-relate…	BLOC1S5
3760.59	1644.73	4141.17	2843.49	2990.56	2657.59	NaN	3389.91	3031.88	5445.04	NaN	NaN	1867.47	NaN	3351.95	NaN	3669.75	2427.01	1	1	1	1	1	1	0	1	1	1	0	0	1	0	1	0	1	1	H3BN13;H3BPR6;H3BST1;Q9UL45;Q9UL45-2	H3BN13;H3BPR6;H3BST1;Q9UL45;Q9UL45-2	Homo sapiens	H3BN13_HUMAN;H3BPR6_HUMAN;H3BST1_HUMAN;BL1S6_HUMAN;BL1S6_HUMAN	Isoform of Q9UL45, Biogenesis of lysosomal organelles complex 1 subunit 6;Isoform of Q9UL45, Biogenesis of lysosomal organelles complex 1 subunit 6 (Fragment);Isoform of Q9UL45, Biogenesis of lysosome-related organelles complex 1 subunit 6;Biogenesis of lysosome-related organelles complex 1 subunit 6;Isoform of Q9UL45, Isoform 2 of Biogenesis of lysosome-related organelles complex 1 subunit 6	BLOC1S6
NaN	1091.01	1075.2	1015.51	816.955	723.739	1233.2	817.547	968.562	930.304	557.788	546.907	NaN	NaN	368.951	NaN	NaN	NaN	0	1	1	1	1	1	1	1	1	1	1	1	0	0	1	0	0	0	A0A0C4DGH6;A0JNW5;H0YHT7	A0A0C4DGH6;A0JNW5;H0YHT7	Homo sapiens	A0A0C4DGH6_HUMAN;BLT3B_HUMAN;H0YHT7_HUMAN	Isoform of A0JNW5, UHRF1 binding protein 1 like;Bridge-like lipid transfer protein family member 3B;Isoform of A0JNW5, UHRF1 binding protein 1 like (Fragment)	BLTP3B
23970.1	27895	21442	31748.1	31478	25963.9	22845.1	27054.8	27445.4	28404.8	29005.8	18621.6	24616.8	25777	22241.1	24711.5	24749	23888.5	13	15	15	16	14	14	13	15	13	16	13	16	14	9	15	13	14	15	P53004	P53004	Homo sapiens	BIEA_HUMAN	Biliverdin reductase A	BLVRA
34939.6	48938.2	46675.1	59425.9	50207.6	52745.2	48273.7	51472.4	50247.2	43172.2	55341.8	44387.2	39113.2	56477.3	46982.3	68470.9	62956.9	62759.1	13	13	14	14	13	13	10	13	13	14	12	13	13	11	13	13	13	13	P30043	P30043	Homo sapiens	BLVRB_HUMAN	Flavin reductase (NADPH)	BLVRB
6357.34	4039.61	3933.66	4181.65	7433.09	4751.32	6179.37	3733.6	2067.77	2299.61	7018.52	3746.43	5320.96	5165.46	2371.44	12259.3	5202.35	3244.4	2	4	3	4	3	4	3	3	3	2	4	2	2	1	2	4	4	3	H0Y9P1	H0Y9P1	Homo sapiens	H0Y9P1_HUMAN	Isoform of Q9NSY1, BMP-2-inducible protein kinase (Fragment)	BMP2K
4398.37	9599.48	4440.95	3658.2	5543.88	4096.29	3400.44	3458.14	3752.39	4175.32	3278.48	4400.33	3965.09	8010.91	4403.06	NaN	3090.37	4940.73	5	4	7	7	6	7	5	5	4	7	3	6	7	2	7	0	2	5	Q14692	Q14692	Homo sapiens	BMS1_HUMAN	Ribosome biogenesis protein BMS1 homolog	BMS1
47208.1	59788	54557.5	56101.9	56506.9	46688.3	73819.8	42630.8	54984.7	50245.6	61139.9	65438.7	53755.3	60263.3	40242.4	75499.6	24236.3	40459.3	6	5	5	6	6	5	5	5	6	6	3	5	4	2	4	6	4	5	Q12981;Q12981-1	Q12981;Q12981-1	Homo sapiens	SEC20_HUMAN	Vesicle transport protein SEC20;Isoform of Q12981, Isoform 3 of Vesicle transport protein SEC20	BNIP1
3185.76	4252.39	4193.6	2420.46	3339.72	5292.17	5872.06	3684.6	3947.22	3088.69	2666.79	1820.14	2100.17	2213.82	2648.7	2158.77	1429.6	2020	3	2	2	2	2	3	3	1	3	3	2	2	1	1	3	2	1	2	A0A0J9YW18;B4DHJ7;Q12983	A0A0J9YW18;B4DHJ7;Q12983	Homo sapiens	A0A0J9YW18_HUMAN;B4DHJ7_HUMAN;BNIP3_HUMAN	Isoform of Q12983, BCL2 interacting protein 3;Isoform of Q12983, BCL2 interacting protein 3;BCL2/adenovirus E1B 19 kDa protein-interacting protein 3	BNIP3
3729.48	1611.43	2530.76	3578.44	3380.56	3370.31	4328.82	3018.03	2429.78	2504.66	2061.82	1858.9	2902.14	NaN	1630.22	2975.01	2745.83	1538.77	3	3	3	3	3	3	3	3	3	3	3	3	3	0	3	3	3	2	H0YBC7;O60238;O60238-2	H0YBC7;O60238;O60238-2	Homo sapiens	H0YBC7_HUMAN;BNI3L_HUMAN;BNI3L_HUMAN	Isoform of O60238, BCL2 interacting protein 3 like (Fragment);BCL2/adenovirus E1B 19 kDa protein-interacting protein 3-like;Isoform of O60238, Isoform 2 of BCL2/adenovirus E1B 19 kDa protein-interacting protein 3-like	BNIP3L
2833.16	1408.91	1941.56	2440.08	2104.28	2154.76	1291.32	1985.7	1446.91	2112.48	2102.86	1051.9	1605.65	853.97	1601.57	1463.03	1499.9	1333.2	2	2	2	2	2	2	2	2	2	2	2	1	2	1	2	1	2	2	Q96IK1	Q96IK1	Homo sapiens	BOD1_HUMAN	Biorientation of chromosomes in cell division protein 1	BOD1
1762.36	NaN	1317.08	1866.94	1219.08	1915.36	NaN	2442.9	2328.8	2189.94	NaN	1657.88	2308.62	NaN	1522.57	NaN	NaN	4341.53	2	0	2	2	2	1	0	2	2	2	0	2	2	0	2	0	0	1	H0Y9Y2;Q8NFC6	H0Y9Y2;Q8NFC6	Homo sapiens	H0Y9Y2_HUMAN;BD1L1_HUMAN	Isoform of Q8NFC6, Biorientation of chromosomes in cell division 1 like 1;Biorientation of chromosomes in cell division protein 1-like 1	BOD1L1
6383.3	4609.87	4894.83	5607.16	6035.15	4158.89	4132.19	3111.84	3420.68	4705.57	3891.78	5098.33	4492.76	3214.01	4142.3	4459.38	3970.69	5065.75	3	3	3	3	3	2	2	3	2	3	1	2	3	1	3	1	3	3	Q9Y3E2	Q9Y3E2	Homo sapiens	BOLA1_HUMAN	BolA-like protein 1	BOLA1
19775.5	16567.6	18333.4	20753.8	13382.8	21272.7	16755	15498.5	15520	12962	24671.7	18543.9	16417.8	18982.5	15677.6	28937	17361.7	17453.3	5	4	7	7	5	6	5	5	6	6	4	6	6	4	7	5	5	6	Q9H3K6	Q9H3K6	Homo sapiens	BOLA2_HUMAN	BolA-like protein 2	BOLA2B
5374.99	5320.54	4463.34	5596.57	5699.55	7112.1	3046.1	4471.76	5487.28	4255.24	2806.68	6537.4	3533.27	7812.09	4094.84	4678.3	NaN	4498.44	5	5	5	5	5	5	3	5	5	5	2	5	4	3	5	2	0	5	Q14137;Q14137-2	Q14137;Q14137-2	Homo sapiens	BOP1_HUMAN	Ribosome biogenesis protein BOP1;Isoform of Q14137, Isoform 2 of Ribosome biogenesis protein BOP1	BOP1
3145.06	2519.53	2351.02	4033.4	4606.31	3829.25	NaN	4612.55	2407.15	4257.54	3585.99	3992.12	NaN	2398.99	3090.52	NaN	3970.69	3096.26	2	2	2	2	2	2	0	2	1	2	2	2	0	1	2	0	2	2	G3V1P3;Q969J3	G3V1P3;Q969J3	Homo sapiens	G3V1P3_HUMAN;BORC5_HUMAN	Isoform of Q969J3, BLOC-1-related complex subunit 5;BLOC-1-related complex subunit 5	BORCS5
4965.61	4688.13	3941.68	4613.42	4565.89	3671.98	4416.76	4118.92	4356.67	4114.77	5093	3519.76	3715.32	5609.1	3198.26	5491.47	4604.46	3587.75	3	3	3	3	3	3	3	3	3	3	3	3	3	2	3	2	3	3	A0A0B4J1R7;Q96B45	A0A0B4J1R7;Q96B45	Homo sapiens	A0A0B4J1R7_HUMAN;BORC7_HUMAN	BORCS7-ASMT readthrough, BLOC-1-related complex subunit 7;BLOC-1-related complex subunit 7	BORCS7-ASMT
3698.76	4956.74	5387.05	4412.25	4117.09	4512.97	5706.1	4381.26	4378.3	3514.92	7710.4	6387.92	3563.11	9474.1	3979.16	7757.37	4745.5	5451.31	1	1	1	1	1	1	1	1	1	1	1	1	1	1	1	1	1	1	K7ENY0;Q96FH0;Q96FH0-2	K7ENY0;Q96FH0;Q96FH0-2	Homo sapiens	K7ENY0_HUMAN;BORC8_HUMAN;BORC8_HUMAN	Isoform of Q96FH0, BLOC-1 related complex subunit 8 (Fragment);BLOC-1-related complex subunit 8;Isoform of Q96FH0, Isoform 2 of BLOC-1-related complex subunit 8	BORCS8
9978.33	3820.45	14439.6	8185.29	4932.78	8912.7	5160.8	3645.18	7419.42	2337.78	2153.53	5403.69	4898.07	NaN	6885.65	6.65997	4251.91	1854.22	2	3	3	3	3	3	2	2	2	2	3	3	2	0	3	2	2	2	P07738	P07738	Homo sapiens	PMGE_HUMAN	Bisphosphoglycerate mutase	BPGM
7317.93	7627.85	7125.11	6662.59	6951.32	7395.14	6550.29	5950.74	5953.19	5627.81	6790.88	5517.88	7384.05	9440.07	6056.31	6962.91	10513.1	6346.84	9	8	10	10	9	10	9	9	9	10	10	9	10	4	10	7	10	9	O95861;O95861-4	O95861;O95861-4	Homo sapiens	BPNT1_HUMAN	3'(2'),5'-bisphosphate nucleotidase 1;Isoform of O95861, Isoform 4 of 3'(2'),5'-bisphosphate nucleotidase 1	BPNT1
35088.6	28957.3	32076.6	30204.9	34458.5	28214.8	39244.4	22853.2	33507.5	32360.7	29860.2	34493.7	28849	21017.7	28056.8	20464.6	16930.6	27080	11	10	13	13	10	13	11	11	10	12	11	13	12	8	12	8	11	12	Q9NX62	Q9NX62	Homo sapiens	IMPA3_HUMAN	Golgi-resident adenosine 3',5'-bisphosphate 3'-phosphatase	BPNT2
1420.12	357.556	2621.74	2037.37	1929.5	1586.06	2270.92	2193.69	NaN	1426.02	3319.98	1817.63	1711.72	5243.91	1594.24	NaN	2136.3	1810.72	1	1	1	1	1	1	1	1	0	1	1	1	1	1	1	0	1	1	A0A2R8Y8E0;A0A2U3TZI2;H7C560;P10398;P15056	A0A2R8Y8E0;A0A2U3TZI2;H7C560;P10398;P15056	Homo sapiens	A0A2R8Y8E0_HUMAN;A0A2U3TZI2_HUMAN;H7C560_HUMAN;ARAF_HUMAN;BRAF_HUMAN	Isoform of P15056, non-specific serine/threonine protein kinase;Isoform of P15056, non-specific serine/threonine protein kinase;Isoform of P15056, non-specific serine/threonine protein kinase;Serine/threonine-protein kinase A-Raf;Serine/threonine-protein kinase B-raf	BRAF
2790.91	3270.68	824.153	2215.39	2200.42	2083.03	1122.12	2043.75	1839.24	2593.59	7880.17	2701.87	3128.3	NaN	2959.89	NaN	1522.16	2532.43	1	1	1	2	2	2	1	2	2	2	1	1	2	0	1	0	1	1	Q6PJG6;Q6PJG6-3	Q6PJG6;Q6PJG6-3	Homo sapiens	BRAT1_HUMAN	BRCA1-associated ATM activator 1;Isoform of Q6PJG6, Isoform 3 of BRCA1-associated ATM activator 1	BRAT1
4934.27	4685.68	5912.1	4386.84	5132.01	4649.61	3974.31	4369.81	3188.55	4737.81	5328.75	4599.01	5080.19	41.7401	3287.69	2677.49	3627.47	3842.25	4	4	4	4	3	3	3	3	3	4	3	4	4	2	4	3	4	4	P46736;P46736-2;P46736-3	P46736;P46736-2;P46736-3	Homo sapiens	BRCC3_HUMAN	Lys-63-specific deubiquitinase BRCC36;Isoform of P46736, Isoform 1 of Lys-63-specific deubiquitinase BRCC36;Isoform of P46736, Isoform 3 of Lys-63-specific deubiquitinase BRCC36	BRCC3
2298.76	2668.2	2172.5	2898.12	3426.37	2598.74	1990	2424.85	2089.48	2873.24	1813.8	2781.52	2562.54	28.827	1561.7	NaN	799.194	2174.03	3	2	3	3	3	3	3	3	3	3	2	3	3	2	3	0	1	3	A0A0G2JHL0;A0A0G2JK44;A0A140T9E9;A0A140T9F7;A0A140T9V2;H0Y6K2;P25440;P25440-2;P25440-3;P25440-4;U3KQA6	A0A0G2JHL0;A0A0G2JK44;A0A140T9E9;A0A140T9F7;A0A140T9V2;H0Y6K2;P25440;P25440-2;P25440-3;P25440-4;U3KQA6	Homo sapiens	A0A0G2JHL0_HUMAN;A0A0G2JK44_HUMAN;A0A140T9E9_HUMAN;A0A140T9F7_HUMAN;A0A140T9V2_HUMAN;H0Y6K2_HUMAN;BRD2_HUMAN;BRD2_HUMAN;BRD2_HUMAN;BRD2_HUMAN;U3KQA6_HUMAN	Isoform of P25440, Bromodomain-containing protein 2 (Fragment);Isoform of P25440, Bromodomain-containing protein 2;Isoform of P25440, Bromodomain-containing protein 2 (Fragment);Isoform of P25440, Bromodomain-containing protein 2 (Fragment);Isoform of P25440, Bromodomain-containing protein 2 (Fragment);Isoform of P25440, Bromodomain containing 2 (Fragment);Bromodomain-containing protein 2;Isoform…	BRD2
5905.66	NaN	3929.02	4084.21	5330.51	3941.31	NaN	5411.12	NaN	6019.41	6787.43	NaN	4320.18	NaN	3685.32	NaN	NaN	4755.82	1	0	1	1	1	1	0	1	0	1	1	0	1	0	1	0	0	1	Q15059-2	Q15059-2	Homo sapiens	BRD3_HUMAN	Isoform of Q15059, Isoform 2 of Bromodomain-containing protein 3	BRD3
3796.4	2052.72	2755.27	3313.73	3574.51	1489.33	2646.73	3333.56	3071.71	3022.61	1829.18	2207.34	3592.6	NaN	3072.71	1806.78	1108.27	2455.86	4	4	6	6	6	5	1	5	6	5	2	6	5	0	6	1	3	5	O60885	O60885	Homo sapiens	BRD4_HUMAN	Bromodomain-containing protein 4	BRD4
120220	192706	52873.7	43743.4	161141	249606	466948	186072	179854	48998.9	656339	171942	62246.3	222696	82623.1	421265	107189	90696.4	2	2	2	2	2	2	2	2	2	2	2	2	2	2	2	2	2	2	C9JBY0;Q9H8M2;Q9H8M2-1;Q9H8M2-3;Q9H8M2-4;Q9H8M2-6	C9JBY0;Q9H8M2;Q9H8M2-1;Q9H8M2-3;Q9H8M2-4;Q9H8M2-6	Homo sapiens	C9JBY0_HUMAN;BRD9_HUMAN;BRD9_HUMAN;BRD9_HUMAN;BRD9_HUMAN;BRD9_HUMAN	Isoform of Q9H8M2, Bromodomain containing 9 (Fragment);Bromodomain-containing protein 9;Isoform of Q9H8M2, Isoform 5 of Bromodomain-containing protein 9;Isoform of Q9H8M2, Isoform 3 of Bromodomain-containing protein 9;Isoform of Q9H8M2, Isoform 4 of Bromodomain-containing protein 9;Isoform of Q9H8M2, Isoform 6 of Bromodomain-containing protein 9	BRD9
5423.69	2370.71	3727.51	3876.98	7577.63	4227.03	4932.8	4186.18	6234.11	4390.08	3909.27	4656.67	3939.72	7999.14	5649.63	8657.38	2584.85	4509.51	3	3	3	3	2	3	2	2	2	3	2	2	3	1	3	1	1	3	A0A5F9ZHY7	A0A5F9ZHY7	Homo sapiens	A0A5F9ZHY7_HUMAN	Isoform of Q8WY22, BRI3 binding protein	BRI3BP
68478	82928.7	71090.3	67379.4	62719.5	74128.3	55815.1	77844.8	81450.8	31947.4	72786.6	72435.1	70362.8	83146.6	72696.7	76000	70354.1	75267.2	1	1	1	1	1	1	1	1	1	1	1	1	1	1	1	1	1	1	Q9C0B6;Q9C0B6-2	Q9C0B6;Q9C0B6-2	Homo sapiens	BRNP2_HUMAN	BMP/retinoic acid-inducible neural-specific protein 2;Isoform of Q9C0B6, Isoform 2 of BMP/retinoic acid-inducible neural-specific protein 2	BRINP2
8369.02	11350.3	9555.15	9151.78	12252.5	12947.2	7383.16	7981.71	10218.7	6375.44	8263.13	11642.8	8864.81	11008.9	6882.5	8767.74	5039.72	11229.6	2	3	5	5	4	5	4	4	4	4	3	5	4	4	3	4	3	5	Q8TDN6	Q8TDN6	Homo sapiens	BRX1_HUMAN	Ribosome biogenesis protein BRX1 homolog	BRIX1
13051.7	11422.2	11913.1	12776.2	12000.4	9237.8	9634.49	8835.4	7240.38	11429.6	10304.6	10836.7	12136	9543.52	9532.38	9555.78	13430.5	11224.6	4	3	3	5	4	4	4	4	4	5	3	5	3	3	5	4	4	3	Q8WUW1;Q8WUW1-2	Q8WUW1;Q8WUW1-2	Homo sapiens	BRK1_HUMAN	Protein BRICK1;Isoform of Q8WUW1, Isoform 2 of Protein BRICK1	BRK1
10914.5	11489.4	7900.45	10752.7	11617.8	11014.3	11632.7	12008.1	8170.15	9209	12535	9590.25	11080.3	6174.23	8743.21	10522.5	8103.02	8240.45	10	10	9	9	8	9	6	9	8	8	7	8	9	3	9	5	8	7	Q5VW32	Q5VW32	Homo sapiens	BROX_HUMAN	BRO1 domain-containing protein BROX	BROX
1526.64	1761.25	1574.76	1446.91	2041.35	1466.38	1591.7	827.173	1333.04	792.329	594.856	1620.27	1038.48	1019.05	1440.93	898.695	249.795	1359.58	2	2	2	2	2	2	2	1	2	2	2	2	2	2	2	2	2	2	Q9NW68;Q9NW68-2	Q9NW68;Q9NW68-2	Homo sapiens	BSDC1_HUMAN	BSD domain-containing protein 1;Isoform of Q9NW68, Isoform 2 of BSD domain-containing protein 1	BSDC1
110008	88558	97972	97929.3	103106	112454	132603	95356.5	97392.5	70371	85546.7	120633	83633.5	120022	101850	128902	99826.9	91661.7	13	12	14	16	15	15	12	15	14	16	13	15	14	11	14	10	13	14	A0A7P0TA85;P35613;P35613-2	A0A7P0TA85;P35613;P35613-2	Homo sapiens	A0A7P0TA85_HUMAN;BASI_HUMAN;BASI_HUMAN	Isoform of P35613, Basigin (Ok blood group);Basigin;Isoform of P35613, Isoform 2 of Basigin	BSG
5362.59	4234.83	8508.29	4405.31	5166.67	3098.38	15806.8	3015.04	3268.89	1374.02	4271.22	4538.52	2694.07	NaN	2253.17	NaN	4588.45	1470.9	4	3	5	4	4	3	4	3	2	2	4	4	4	0	3	0	3	2	A6NC48;Q10588	A6NC48;Q10588	Homo sapiens	A6NC48_HUMAN;BST1_HUMAN	Isoform of Q10588, ADP-ribosyl cyclase/cyclic ADP-ribose hydrolase;ADP-ribosyl cyclase/cyclic ADP-ribose hydrolase 2	BST1
8760.32	NaN	NaN	NaN	NaN	NaN	NaN	NaN	NaN	NaN	NaN	NaN	NaN	1360.3	2634.42	NaN	NaN	NaN	2	0	0	0	0	0	0	0	0	0	0	0	0	2	1	0	0	0	Q10589;Q10589-2	Q10589;Q10589-2	Homo sapiens	BST2_HUMAN	Bone marrow stromal antigen 2;Isoform of Q10589, Isoform 2 of Bone marrow stromal antigen 2	BST2
11307.8	6984.74	9792.02	9375.73	10934.7	8876.98	6287.26	10860.6	8859.66	9535.8	6908.3	8708.69	8634.38	12372.7	8707.5	6194.96	2802.02	8867.65	6	6	7	7	6	6	5	5	3	7	5	7	7	3	7	3	4	6	O14981	O14981	Homo sapiens	BTAF1_HUMAN	TATA-binding protein-associated factor 172	BTAF1
26670.4	32568.2	29992.7	33263.7	36671.1	32946.1	30680.1	32955.8	33960.4	37484.8	28825.1	37697.8	34597.6	39258.7	32354	25910.1	19981	35092.3	13	11	13	14	14	13	12	13	13	14	9	12	13	11	12	9	12	13	P20290;P20290-2	P20290;P20290-2	Homo sapiens	BTF3_HUMAN	Transcription factor BTF3;Isoform of P20290, Isoform 2 of Transcription factor BTF3	BTF3
34734.5	27268.4	31676.5	29221.9	31397	30618.9	27289.3	23825.4	28383	27759.6	24270.2	31573.2	28105.2	28721	25023.7	26973.9	19007.4	32602.4	8	8	8	8	7	8	8	7	8	8	6	7	8	5	8	6	8	8	Q96K17	Q96K17	Homo sapiens	BT3L4_HUMAN	Transcription factor BTF3 homolog 4	BTF3L4
1976.7	2644.93	2591.96	2311.88	2812.79	2853.63	2485.03	1791.74	3164.63	2263.66	3312.18	2405.2	1419.24	1213.18	2621.42	4838.11	3891.3	2333.59	3	3	3	3	2	3	3	2	2	3	1	3	3	1	2	2	3	3	Q7KYR7;Q7KYR7-1;Q7KYR7-3;Q7KYR7-5	Q7KYR7;Q7KYR7-1;Q7KYR7-3;Q7KYR7-5	Homo sapiens	BT2A1_HUMAN	Butyrophilin subfamily 2 member A1;Isoform of Q7KYR7, Isoform 2 of Butyrophilin subfamily 2 member A1;Isoform of Q7KYR7, Isoform 3 of Butyrophilin subfamily 2 member A1;Isoform of Q7KYR7, Isoform 5 of Butyrophilin subfamily 2 member A1	BTN2A1
4674.81	4096.07	NaN	3836.52	3925.54	5210.58	NaN	4070.23	3789.3	4427.48	3383.57	4980.16	3838.05	12508.2	2808.64	6669.41	4761.01	5479.03	1	1	0	1	1	1	0	1	1	1	1	1	1	1	1	1	1	1	Q9UIR0-4	Q9UIR0-4	Homo sapiens	BTNL2_HUMAN	Isoform of Q9UIR0, Isoform 4 of Butyrophilin-like protein 2	BTNL2
30980.3	26369.4	31092.5	34414.7	34791.2	28844.4	20735.2	33706.4	35222.4	34614.3	28491.6	30024.9	34031.2	42068.1	37285.3	22978.7	15753.8	35710.9	12	11	13	13	12	12	9	13	11	13	11	12	13	10	13	10	11	12	O43684;O43684-2	O43684;O43684-2	Homo sapiens	BUB3_HUMAN	Mitotic checkpoint protein BUB3;Isoform of O43684, Isoform 2 of Mitotic checkpoint protein BUB3	BUB3
NaN	5118.19	7649.14	8052.88	NaN	NaN	NaN	NaN	NaN	8429.16	NaN	NaN	5899.51	NaN	NaN	NaN	NaN	6383.94	0	1	1	1	0	0	0	0	0	1	0	0	1	0	0	0	0	1	Q9BRD0;Q9BRD0-2	Q9BRD0;Q9BRD0-2	Homo sapiens	BUD13_HUMAN	BUD13 homolog;Isoform of Q9BRD0, Isoform 2 of BUD13 homolog	BUD13
1154.26	1469.04	1035.59	939.237	751.335	916.274	982.069	855.959	1746.16	1232.35	1359.04	831.691	1286.66	2022.09	959.097	NaN	461.811	1516.6	1	1	1	1	1	1	1	1	1	1	1	1	1	1	1	0	1	1	P41223;P41223-2	P41223;P41223-2	Homo sapiens	BUD31_HUMAN	Protein BUD31 homolog;Isoform of P41223, Isoform 2 of Protein BUD31 homolog	BUD31
10548	8688.91	12411.2	11502.6	13555.3	11912.5	9804.98	9117.73	12270.8	11828.8	9285.37	12265	11561.9	11477.2	9824.72	8150.62	4453	11635.2	10	8	12	11	11	10	7	8	10	12	7	11	11	6	10	5	6	11	Q13895	Q13895	Homo sapiens	BYST_HUMAN	Bystin	BYSL
33653.6	31548.1	44246.1	34165.4	34905.8	32846.2	27581.1	33522.2	36738.9	33547.2	30806.3	34899.6	34103.9	38603.3	30991.6	22831.5	21317.5	37114.9	28	26	28	28	28	26	27	28	27	28	26	28	28	24	28	25	27	28	Q7L1Q6;Q7L1Q6-3;Q7L1Q6-4	Q7L1Q6;Q7L1Q6-3;Q7L1Q6-4	Homo sapiens	5MP2_HUMAN	eIF5-mimic protein 2;Isoform of Q7L1Q6, Isoform 3 of eIF5-mimic protein 2;Isoform of Q7L1Q6, Isoform 4 of eIF5-mimic protein 2	BZW1
23570.5	23279.3	23446.2	20641.7	26306.1	21455.4	21371.6	24697	22444.9	24337.2	18766.1	27095.3	21773.4	30541.5	24538.6	21972.8	15987.2	22841.1	19	18	22	21	22	21	19	18	18	22	14	21	22	13	22	12	15	22	E7ETZ4;Q9Y6E2	E7ETZ4;Q9Y6E2	Homo sapiens	E7ETZ4_HUMAN;5MP1_HUMAN	Isoform of Q9Y6E2, Basic leucine zipper and W2 domains 2 (Fragment);eIF5-mimic protein 1	BZW2
7081.43	7565.06	9411.2	7354.37	6481.3	7741.86	5681.13	6703.84	6163.71	4423.51	8134.02	7602.99	7512.79	4061.76	4588.11	14616	5841.26	8481.12	3	2	4	4	3	4	3	3	4	3	2	4	4	1	1	4	3	4	A0A087WT99;Q9H0W9;Q9H0W9-2;Q9H0W9-3	A0A087WT99;Q9H0W9;Q9H0W9-2;Q9H0W9-3	Homo sapiens	A0A087WT99_HUMAN;CK054_HUMAN;CK054_HUMAN;CK054_HUMAN	Isoform of Q9H0W9, Chromosome 11 open reading frame 54;Ester hydrolase C11orf54;Isoform of Q9H0W9, Isoform 2 of Ester hydrolase C11orf54;Isoform of Q9H0W9, Isoform 3 of Ester hydrolase C11orf54	C11orf54
6945.12	9794.55	10764.4	14875.7	10618.2	11711.6	6933.12	11566.9	8597.85	8833.1	8985.82	10226	5765.5	8775.84	7537.07	7710.02	5607.79	10715.5	1	2	2	2	1	2	1	2	2	1	1	2	2	2	2	1	1	1	E9PM92;O00193	E9PM92;O00193	Homo sapiens	E9PM92_HUMAN;SMAP_HUMAN	Isoform of O00193, Small acidic protein;Small acidic protein	C11orf58
36803.5	33828.6	36738.6	41838.5	37808.2	34411.4	25168.9	41382	27299.6	28905.2	29062.8	35419	37723.8	38963	35946	46229.7	27985.3	25515.7	5	5	8	10	5	6	6	6	6	8	5	7	7	3	9	5	6	5	Q9H3H3;Q9H3H3-1;Q9H3H3-3	Q9H3H3;Q9H3H3-1;Q9H3H3-3	Homo sapiens	CK068_HUMAN	UPF0696 protein C11orf68;Isoform of Q9H3H3, Isoform 1 of UPF0696 protein C11orf68;Isoform of Q9H3H3, Isoform 3 of UPF0696 protein C11orf68	C11orf68
14710.3	13904.4	15635.5	17757.8	16432.5	11358.8	14886.8	11695.7	18450.3	17554.6	9646.27	15312.9	11709.4	22269.4	14367.9	11241.5	6586.44	19287.2	1	1	1	1	1	1	1	1	1	1	1	1	1	1	1	1	1	1	A0A494BXY3;E9PLD3;E9PRG8	A0A494BXY3;E9PLD3;E9PRG8	Homo sapiens	A0A494BXY3_HUMAN;E9PLD3_HUMAN;CK098_HUMAN	Isoform of E9PRG8, Chromosome 11 open reading frame 98;readthrough, Uncharacterized protein;Uncharacterized protein C11orf98	C11orf98
1751.15	1571.43	1452.96	1891.54	2164.28	1577	1610.67	1551.08	2167.65	1522.94	2246.76	2075.34	1723.64	NaN	1451.37	NaN	1131.07	2659.59	4	2	4	3	3	3	1	4	3	4	2	4	4	0	4	0	1	4	E7ENF1;F5H7W8;Q96C57	E7ENF1;F5H7W8;Q96C57	Homo sapiens	E7ENF1_HUMAN;F5H7W8_HUMAN;CSTOS_HUMAN	Isoform of Q96C57, Protein CUSTOS;Isoform of Q96C57, Protein CUSTOS;Protein CUSTOS	C12orf43
4061.68	5807.25	6787.12	4756.14	7318.6	6666.41	6586.11	8785.07	7497.76	9197.3	5626.47	7111.97	6314.93	6722.56	13524.1	5248.84	4992.23	7515.65	3	4	4	3	4	4	4	4	4	3	3	4	3	3	4	2	4	4	Q99622	Q99622	Homo sapiens	C10_HUMAN	Protein C10	C12orf57
13199.1	8741.51	6383.6	8951.12	11776.2	7706.11	12195.7	13417.5	10356.3	4905.03	7203.14	6748.27	9737.78	15459.4	8967.14	6882.66	12295	9583.84	2	2	2	2	2	2	2	2	2	1	2	2	2	1	2	1	2	2	F8VQD4;Q8TAD7	F8VQD4;Q8TAD7	Homo sapiens	F8VQD4_HUMAN;OCC1_HUMAN	Isoform of Q8TAD7, Chromosome 12 open reading frame 75 (Fragment);Overexpressed in colon carcinoma 1 protein	C12orf75
3938.01	4892.22	1233.95	1597.64	4042.11	6087.48	3385.45	4617.57	NaN	3280.99	1234.67	1508.53	3890.89	NaN	3654.95	NaN	1518.02	3601.86	2	1	2	2	2	1	1	1	0	2	1	1	2	0	2	0	1	2	Q9NWQ9	Q9NWQ9	Homo sapiens	CN119_HUMAN	Uncharacterized protein C14orf119	C14orf119
9075.56	10707.3	8915.48	9709.94	11056.9	8987.74	6926.99	11490.5	6202.31	7485.03	9574.35	8022.77	8744.85	11943.3	9335.5	9691.58	6849.25	9548.38	1	2	2	3	2	1	2	3	3	3	1	2	3	2	4	1	3	2	A0A0A6YYH1;Q7Z6K5-2	A0A0A6YYH1;Q7Z6K5-2	Homo sapiens	A0A0A6YYH1_HUMAN;ARPIN_HUMAN	C15orf38-AP3S2 readthrough, Arpin;Isoform of Q7Z6K5, Isoform C15orf38-AP3S2 of Arpin	C15orf38-AP3S2
3258.07	4061.43	3926.39	4033.22	3889.09	2734.39	2016.7	3337.97	2166.58	3592.19	2733.47	3289.65	2316.61	NaN	3749.77	2056.74	2604.03	2201.48	2	1	1	2	2	1	1	1	1	2	1	1	1	0	1	1	1	1	Q8WUR7	Q8WUR7	Homo sapiens	CO040_HUMAN	UPF0235 protein C15orf40	C15orf40
18418.9	7179.61	10212.2	13718.9	12284.6	7645.55	7964.67	13835.6	9123.75	11698.7	10199.1	9810.81	13662.3	NaN	9847.05	7332.89	7308.79	11253.5	2	3	3	3	3	3	3	3	2	3	2	3	3	0	3	1	2	2	F8W038;Q8IXM2;Q8IXM2-3	F8W038;Q8IXM2;Q8IXM2-3	Homo sapiens	F8W038_HUMAN;BAP18_HUMAN;BAP18_HUMAN	Isoform of Q8IXM2, Chromosome 17 open reading frame 49;Chromatin complexes subunit BAP18;Isoform of Q8IXM2, Isoform 3 of Chromatin complexes subunit BAP18	C17orf49
2825.87	2601.67	4160.6	3101.67	2929.12	2995.77	1781.72	4451.76	3161.9	3797.65	1535.73	1985.45	2743.12	62.1258	2050.77	1589.11	1637.53	1789.96	1	3	3	3	3	3	3	3	3	3	2	3	2	2	3	1	2	3	J9JIC5;Q9HAS0	J9JIC5;Q9HAS0	Homo sapiens	J9JIC5_HUMAN;NJMU_HUMAN	Isoform of Q9HAS0, Chromosome 17 open reading frame 75;Protein Njmu-R1	C17orf75
3077.09	804.928	3287.71	3477.71	3329.2	2602.81	2046.08	2829.84	3220.6	5280.67	3037.44	3570.48	2626.17	2433.7	3027.59	NaN	1268.53	4350.43	1	2	1	2	2	2	1	2	1	2	1	2	1	1	2	0	2	2	Q96B23-2	Q96B23-2	Homo sapiens	CR025_HUMAN	Isoform of Q96B23, Isoform 2 of Protein C18orf25	C18orf25
NaN	NaN	1031.15	720.884	848.934	NaN	NaN	NaN	NaN	1623.27	720.173	NaN	NaN	NaN	NaN	NaN	910.345	NaN	0	0	1	1	1	0	0	0	0	1	1	0	0	0	0	0	1	0	Q8TCD1	Q8TCD1	Homo sapiens	CR032_HUMAN	UPF0729 protein C18orf32	C18orf32
4134.97	4647.53	3723.51	5014.46	2734.48	7809.94	6310.76	4975.75	6536.69	3591.08	5259.17	3749.02	3509.91	1064.31	4152.88	4453.41	5277.48	3487.4	1	1	1	1	1	1	1	1	1	1	1	1	1	1	1	1	1	1	A0A8C8PZE2;K7EPS8;Q9NSK7;Q9NSK7-2;Q9NSK7-4	A0A8C8PZE2;K7EPS8;Q9NSK7;Q9NSK7-2;Q9NSK7-4	Homo sapiens	A0A8C8PZE2_HUMAN;K7EPS8_HUMAN;CS012_HUMAN;CS012_HUMAN;CS012_HUMAN	Isoform of Q9NSK7, Chromosome 19 open reading frame 12 (Fragment);Isoform of Q9NSK7, Chromosome 19 open reading frame 12 (Fragment);Protein C19orf12;Isoform of Q9NSK7, Isoform 2 of Protein C19orf12;Isoform of Q9NSK7, Isoform 1 of Protein C19orf12	C19orf12
NaN	67999.9	NaN	NaN	54422.5	NaN	NaN	55153.5	51779.2	NaN	7615.87	NaN	38239.5	63583.9	57009.8	34794.6	50479.6	NaN	0	1	0	0	1	0	0	1	1	0	1	0	1	1	1	1	1	0	Q8NEA5	Q8NEA5	Homo sapiens	CS018_HUMAN	Uncharacterized protein C19orf18	C19orf18
6531.17	6617.35	5797.46	4940.17	5550.67	4648.59	8092.97	4262.73	5752.88	5048.26	4619.82	5190.61	5019.13	NaN	5757.13	5522.36	5837.82	5077.03	4	4	4	5	5	4	3	2	3	5	1	3	4	0	3	2	4	4	E7EP72;Q9UFG5	E7EP72;Q9UFG5	Homo sapiens	E7EP72_HUMAN;CS025_HUMAN	Isoform of Q9UFG5, Chromosome 19 open reading frame 25;UPF0449 protein C19orf25	C19orf25
3374.87	3407.47	8094.14	5732.07	6334.07	5681.57	9476.12	3403.08	6421.63	4256.89	5109.06	6334.29	4666.5	4894.26	6231.12	6000.17	2629.16	3831.28	3	3	6	5	4	4	5	3	5	5	3	5	4	2	6	4	3	3	Q9NS00	Q9NS00	Homo sapiens	C1GLT_HUMAN	Glycoprotein-N-acetylgalactosamine 3-beta-galactosyltransferase 1	C1GALT1
14251	12102.5	13106.7	12670.7	13493.6	11526.5	14266.2	10424.2	12973	14364.8	11516.7	11626.8	14073.7	11017.9	14866.2	16416.6	15209.7	13154.2	1	1	1	1	1	1	1	1	1	1	1	1	1	1	1	1	1	1	Q6ZSJ8	Q6ZSJ8	Homo sapiens	CA122_HUMAN	Uncharacterized protein C1orf122	C1orf122
NaN	2283.84	NaN	2755.95	NaN	1613.58	NaN	1448.39	NaN	2302.33	NaN	NaN	2909.69	NaN	1869.85	NaN	NaN	2801.09	0	1	0	1	0	1	0	1	0	1	0	0	1	0	1	0	0	1	A0A7P0T887;A0A7P0T8I3;A0A7P0T8M5;A0A7P0TAC3;A0A7P0TAV4;Q8IYL3	A0A7P0T887;A0A7P0T8I3;A0A7P0T8M5;A0A7P0TAC3;A0A7P0TAV4;Q8IYL3	Homo sapiens	A0A7P0T887_HUMAN;A0A7P0T8I3_HUMAN;A0A7P0T8M5_HUMAN;A0A7P0TAC3_HUMAN;A0A7P0TAV4_HUMAN;CA174_HUMAN	Isoform of Q8IYL3, Chromosome 1 open reading frame 174;Isoform of Q8IYL3, Chromosome 1 open reading frame 174;Isoform of Q8IYL3, Chromosome 1 open reading frame 174;Isoform of Q8IYL3, Chromosome 1 open reading frame 174;Isoform of Q8IYL3, Chromosome 1 open reading frame 174;UPF0688 protein C1orf174	C1orf174
3010.5	1279.33	6756.4	4738.67	2949.25	5021.67	2381.28	6779.24	3080.22	2345.25	3779.26	3436.84	2592.88	NaN	6211.52	4081.92	34731.4	4532.09	7	3	9	9	5	6	2	7	3	3	3	6	6	0	9	2	13	7	Q9H425;Q9H425-3	Q9H425;Q9H425-3	Homo sapiens	CA198_HUMAN	Uncharacterized protein C1orf198;Isoform of Q9H425, Isoform 3 of Uncharacterized protein C1orf198	C1orf198
NaN	NaN	NaN	NaN	NaN	NaN	NaN	NaN	NaN	NaN	NaN	NaN	NaN	NaN	1463.55	NaN	NaN	NaN	0	0	0	0	0	0	0	0	0	0	0	0	0	0	1	0	0	0	Q9BV19	Q9BV19	Homo sapiens	CA050_HUMAN	Uncharacterized protein C1orf50	C1orf50
67202.9	64569.8	54275.7	57571.1	73093.5	53311	66155.6	60035.4	68039.2	63696.8	44916.9	68829.1	64915.1	72274.2	56468	66467.9	56835.4	54155.4	6	6	8	8	6	5	6	6	6	8	6	8	8	4	8	4	7	6	Q07021	Q07021	Homo sapiens	C1QBP_HUMAN	Complement component 1 Q subcomponent-binding protein, mitochondrial	C1QBP
2999.63	3309.71	NaN	1344.07	2938.25	8552.59	9055.07	9665.85	6404.94	426.539	28511.4	4563.74	NaN	24177.2	2748.61	40410.7	5936.49	6402.64	2	1	0	1	1	2	3	2	1	1	3	3	0	2	3	2	3	3	E9PGA6;Q9BXJ4;Q9BXJ4-2;Q9BXJ4-3	E9PGA6;Q9BXJ4;Q9BXJ4-2;Q9BXJ4-3	Homo sapiens	E9PGA6_HUMAN;C1QT3_HUMAN;C1QT3_HUMAN;C1QT3_HUMAN	C1QTNF3-AMACR readthrough, C1QTNF3-AMACR readthrough (NMD candidate);Complement C1q tumor necrosis factor-related protein 3;Isoform of Q9BXJ4, Isoform 2 of Complement C1q tumor necrosis factor-related protein 3;Isoform of Q9BXJ4, Isoform 3 of Complement C1q tumor necrosis factor-related protein 3	C1QTNF3-AMACR
35869.1	18049.9	30846.6	33821.3	20923.4	23731.1	20718.3	23139	19718	29774.4	27229.3	16598.2	31842	19850.2	19423.3	20566.1	18515.7	25974.5	8	6	9	8	10	9	5	8	7	8	9	9	9	6	10	4	9	7	Q9GZN8;Q9GZN8-2	Q9GZN8;Q9GZN8-2	Homo sapiens	CT027_HUMAN	UPF0687 protein C20orf27;Isoform of Q9GZN8, Isoform 2 of UPF0687 protein C20orf27	C20orf27
1724.8	1371.03	1745.61	1771.43	1294.17	773.309	NaN	1602.66	NaN	1717.11	NaN	1376.29	NaN	NaN	NaN	NaN	NaN	1292.86	1	1	1	1	1	1	0	1	0	1	0	1	0	0	0	0	0	1	H0YFC4;Q86YS7;Q86YS7-2;Q86YS7-3;Q86YS7-4;Q86YS7-5	H0YFC4;Q86YS7;Q86YS7-2;Q86YS7-3;Q86YS7-4;Q86YS7-5	Homo sapiens	H0YFC4_HUMAN;C2CD5_HUMAN;C2CD5_HUMAN;C2CD5_HUMAN;C2CD5_HUMAN;C2CD5_HUMAN	Isoform of Q86YS7, C2 calcium dependent domain containing 5 (Fragment);C2 domain-containing protein 5;Isoform of Q86YS7, Isoform 2 of C2 domain-containing protein 5;Isoform of Q86YS7, Isoform 3 of C2 domain-containing protein 5;Isoform of Q86YS7, Isoform 4 of C2 domain-containing protein 5;Isoform of Q86YS7, Isoform 5 of C2 domain-containing protein 5	C2CD5
5006.53	2441.02	3720.06	5737.68	NaN	NaN	NaN	NaN	2938.31	5572.99	NaN	2527.05	5792.21	NaN	NaN	NaN	NaN	NaN	1	1	1	1	0	0	0	0	1	1	0	1	1	0	0	0	0	0	C9J4K0;Q9BVC5;Q9BVC5-2	C9J4K0;Q9BVC5;Q9BVC5-2	Homo sapiens	C9J4K0_HUMAN;ASHWN_HUMAN;ASHWN_HUMAN	Isoform of Q9BVC5, Ashwin;Ashwin;Isoform of Q9BVC5, Isoform 2 of Ashwin	C2orf49
46560.9	55508.2	5976.65	5991.29	60625.6	21532	33940.2	46595.6	56168.6	5375.33	74949.6	21731.8	31066.5	290530	30743.1	95327.1	24664.1	34347.7	13	17	10	11	19	14	19	19	18	10	17	15	14	17	18	17	17	17	P01024	P01024	Homo sapiens	CO3_HUMAN	Complement C3	C3
15750.4	15571.7	12954.7	14813.7	15656.1	29452.5	28478.6	17933.7	17423.6	10857.2	82682	17996.6	8873.47	74274.6	9842.32	98269.9	19352.6	30128.4	14	12	15	14	13	14	15	14	13	13	15	15	12	13	13	15	14	14	A0A0G2JPR0;A0A140TA32;A0A140TA44;A0A140TA49;P0C0L4;P0C0L4-2	A0A0G2JPR0;A0A140TA32;A0A140TA44;A0A140TA49;P0C0L4;P0C0L4-2	Homo sapiens	A0A0G2JPR0_HUMAN;A0A140TA32_HUMAN;A0A140TA44_HUMAN;A0A140TA49_HUMAN;CO4A_HUMAN;CO4A_HUMAN	Isoform of P0C0L4, Complement C4-A;Isoform of P0C0L4, Complement C4-A;Isoform of P0C0L4, Complement C4-A;Isoform of P0C0L4, Complement C4-A;Complement C4-A;Isoform of P0C0L4, Isoform 2 of Complement C4-A	C4A
NaN	1463.66	767.652	909.4	NaN	584.171	NaN	NaN	NaN	1396.12	NaN	NaN	2708.42	NaN	NaN	1864.21	1571.45	NaN	0	1	1	1	0	1	0	0	0	1	0	0	1	0	0	1	1	0	D6RIT3;Q8N1A6	D6RIT3;Q8N1A6	Homo sapiens	D6RIT3_HUMAN;CD033_HUMAN	Isoform of Q8N1A6, Chromosome 4 open reading frame 33;UPF0462 protein C4orf33	C4orf33
61771.6	70798.4	957.483	1461.59	62546.4	2626.85	5800.68	47014.7	65328.3	931.7	21375.4	4557.69	27682.4	114304	21525.1	34411.4	10304.9	7369.41	6	6	3	4	6	3	4	6	6	1	4	4	6	5	6	5	5	5	A0A8Q3SID6;P01031	A0A8Q3SID6;P01031	Homo sapiens	A0A8Q3SID6_HUMAN;CO5_HUMAN	Isoform of P01031, Complement C5;Complement C5	C5
3233.56	1532.79	1764.44	1618.76	2679.34	2849.52	NaN	NaN	NaN	3150.91	3537.73	3263.13	2341.44	NaN	2491.69	826.571	1814.14	4713.25	1	1	2	2	2	2	0	0	0	2	1	2	2	0	1	1	1	1	Q49AR2;Q49AR2-2	Q49AR2;Q49AR2-2	Homo sapiens	CE022_HUMAN	UPF0489 protein C5orf22;Isoform of Q49AR2, Isoform 2 of UPF0489 protein C5orf22	C5orf22
78134.9	29771.4	NaN	NaN	32236.3	NaN	NaN	14013.3	80817.2	NaN	3138.69	NaN	37964.6	97356.4	31265.1	18551.4	7555.32	NaN	3	4	0	0	4	0	0	4	4	0	2	0	3	4	3	2	3	0	P13671	P13671	Homo sapiens	CO6_HUMAN	Complement component C6	C6
7322.08	12734.1	9923.46	10656.8	8246.17	6777.6	16639.9	9465.43	9622.76	11830.2	7023.91	12430.3	10652.7	9054.17	12021.1	9575.99	14073.2	8519.1	1	1	2	2	1	1	2	2	1	2	1	2	1	1	2	1	3	1	Q7Z4R8	Q7Z4R8	Homo sapiens	CF120_HUMAN	UPF0669 protein C6orf120	C6orf120
1752	1737.87	1356.29	2073.73	2531.13	1896.98	2528.42	1890.2	1426.33	1480.19	3120.38	1941.37	1368.71	11301	2194.2	2252.36	913.919	2208.75	2	2	2	2	2	2	2	2	2	2	1	2	2	1	2	2	2	2	Q6UWU4;Q6UWU4-2;Q6UWU4-3	Q6UWU4;Q6UWU4-2;Q6UWU4-3	Homo sapiens	CF089_HUMAN	Bombesin receptor-activated protein C6orf89;Isoform of Q6UWU4, Isoform 2 of Bombesin receptor-activated protein C6orf89;Isoform of Q6UWU4, Isoform 3 of Bombesin receptor-activated protein C6orf89	C6orf89
48757.9	47553.1	3467.09	1058.2	44796.3	5493.57	8192.14	26649.2	21014.6	1189.54	8120.71	3718.73	14245	74073.8	9103.4	22338.7	5717.58	5213.37	1	2	2	1	2	2	2	2	2	2	2	2	2	1	2	1	2	2	A0A8Q3SIM0;P10643	A0A8Q3SIM0;P10643	Homo sapiens	A0A8Q3SIM0_HUMAN;CO7_HUMAN	Isoform of P10643, Complement C7;Complement component C7	C7
9727.21	10117.9	10988.3	14573.9	12398.3	7536.12	7984.84	9506.46	11372.9	16310.3	10650.3	13059.9	13438	14697.5	12641	9770.16	3019.44	16074.2	3	4	4	4	4	4	3	3	4	3	3	4	4	4	4	3	3	4	C9JQV0;Q9BRJ6	C9JQV0;Q9BRJ6	Homo sapiens	C9JQV0_HUMAN;CG050_HUMAN	Isoform of Q9BRJ6, Chromosome 7 open reading frame 50 (Fragment);Uncharacterized protein C7orf50	C7orf50
7536.23	3819.7	5973.72	6426.37	9182.48	4349.29	4590.49	7372.21	5970.46	5514.9	4113.1	6321.57	4003.12	4533.65	3361.4	NaN	2125.21	4030.28	2	2	2	2	2	2	2	2	2	2	2	2	2	1	2	0	2	2	A0A3B3IRR6;A0A3B3IT54;A0A3B3ITA3;Q9H7E9;Q9H7E9-2	A0A3B3IRR6;A0A3B3IT54;A0A3B3ITA3;Q9H7E9;Q9H7E9-2	Homo sapiens	A0A3B3IRR6_HUMAN;A0A3B3IT54_HUMAN;A0A3B3ITA3_HUMAN;CH033_HUMAN;CH033_HUMAN	Isoform of Q9H7E9, Chromosome 8 open reading frame 33;Isoform of Q9H7E9, Chromosome 8 open reading frame 33;Isoform of Q9H7E9, Chromosome 8 open reading frame 33;UPF0488 protein C8orf33;Isoform of Q9H7E9, Isoform 2 of UPF0488 protein C8orf33	C8orf33
6400.14	2156.11	6584.16	2596.68	5111.22	1318.59	1967.26	2391.23	1824.01	3299.16	NaN	4040.11	4007.68	6924.54	3249.35	805.733	4391.32	1606.84	2	1	2	2	2	2	2	2	1	2	0	2	2	1	2	2	2	1	H0YF29;Q6P1X6	H0YF29;Q6P1X6	Homo sapiens	H0YF29_HUMAN;CH082_HUMAN	Isoform of Q6P1X6, Chromosome 8 open reading frame 82 (Fragment);UPF0598 protein C8orf82	C8orf82
113719	107225	1259.55	1604.44	122967	3457.55	8171.31	85203.7	115195	4937.77	10980.3	4470.27	66417.2	109244	38828.7	31296.5	21952.2	4750.65	6	6	3	3	6	4	3	6	6	3	3	3	6	5	6	6	6	3	A0A8Q3SI95;P02748	A0A8Q3SI95;P02748	Homo sapiens	A0A8Q3SI95_HUMAN;CO9_HUMAN	Isoform of P02748, Complement C9;Complement component C9	C9
5528.32	8217.85	10773	9582.47	9910.13	6622.98	3680.12	13389.7	6625.42	5868.27	8157.18	5734.08	6255.85	2380.57	4865.7	2704.37	4447.06	8741.76	2	5	4	4	4	4	4	4	3	4	4	5	4	3	5	5	3	4	Q5T6V5	Q5T6V5	Homo sapiens	QSPP_HUMAN	Queuosine salvage protein	C9orf64
NaN	NaN	1159.27	1178.13	1518.7	NaN	NaN	NaN	1292.85	4029.42	NaN	NaN	2211.41	NaN	NaN	NaN	NaN	1947.68	0	0	2	1	1	0	0	0	2	2	0	0	2	0	0	0	0	1	B3KUB4;O43570;O43570-2	B3KUB4;O43570;O43570-2	Homo sapiens	B3KUB4_HUMAN;CAH12_HUMAN;CAH12_HUMAN	Isoform of O43570, Carbonic anhydrase;Carbonic anhydrase 12;Isoform of O43570, Isoform 2 of Carbonic anhydrase 12	CA12
4980.06	1292.54	NaN	2792.27	1389.74	NaN	921.481	2986.39	348.789	3434.32	NaN	1620.64	8690.35	NaN	3057.46	NaN	NaN	NaN	2	2	0	2	2	0	1	2	1	2	0	2	2	0	2	0	0	0	Q9Y2D0	Q9Y2D0	Homo sapiens	CAH5B_HUMAN	Carbonic anhydrase 5B, mitochondrial	CA5B
11088.7	10741.9	11005.9	11989.5	11204.3	9744.02	8659.59	9741.04	9986.42	10927.1	8558.91	8873.74	13778.2	10645.2	10914.2	6607.25	8322.62	10169.4	14	14	15	14	15	15	10	13	15	15	13	14	14	11	15	11	14	13	Q9Y376	Q9Y376	Homo sapiens	CAB39_HUMAN	Calcium-binding protein 39	CAB39
2517.62	2376.55	2984.36	2401.24	2314.25	2336.66	1799.62	1895.68	2147.45	2180.05	2218.88	1679.73	2869.28	1705.88	2097.01	1459.73	1544.67	1773.51	1	1	2	2	2	2	2	2	1	2	2	3	2	2	3	1	2	2	Q5TAW7;Q9H9S4	Q5TAW7;Q9H9S4	Homo sapiens	Q5TAW7_HUMAN;CB39L_HUMAN	Isoform of Q9H9S4, Calcium binding protein 39 like (Fragment);Calcium-binding protein 39-like	CAB39L
3932.51	3537.84	3645.1	3638.43	2251.95	3019.17	3199.62	3053.6	2277.99	5365.16	NaN	2507.37	3776.79	NaN	3083.76	2904.07	6443.41	2439.53	1	1	1	1	1	1	1	1	1	1	0	1	1	0	1	1	1	1	Q9NZU7-3	Q9NZU7-3	Homo sapiens	CABP1_HUMAN	Isoform of Q9NZU7, Isoform Calbrain of Calcium-binding protein 1	CABP1
2673.93	1747.36	NaN	NaN	3635.9	2953.1	3568.58	NaN	3120.47	2091.33	2892.47	NaN	NaN	NaN	NaN	2485.91	NaN	1871.64	1	1	0	0	1	1	1	0	1	1	1	0	0	0	0	1	0	1	O60840;O60840-4;O60840-5;O60840-6;O60840-7	O60840;O60840-4;O60840-5;O60840-6;O60840-7	Homo sapiens	CAC1F_HUMAN	Voltage-dependent L-type calcium channel subunit alpha-1F;Isoform of O60840, Isoform 3 of Voltage-dependent L-type calcium channel subunit alpha-1F;Isoform of O60840, Isoform 4 of Voltage-dependent L-type calcium channel subunit alpha-1F;Isoform of O60840, Isoform 5 of Voltage-dependent L-type calcium channel subunit alpha-1F;Isoform of O60840, Isoform 6 of Voltage-dependent L-type calcium channe…	CACNA1F
12718.7	11306	13859.8	9580.51	11714.6	9245.53	11541	10338.6	10695.5	8143.64	10815.5	11492.3	8767.67	8395.08	9376.29	8126.67	20139.9	10655.7	9	7	10	9	8	7	9	9	9	9	5	9	8	3	8	4	10	7	P54289;P54289-2;P54289-3;P54289-4;P54289-5	P54289;P54289-2;P54289-3;P54289-4;P54289-5	Homo sapiens	CA2D1_HUMAN	Voltage-dependent calcium channel subunit alpha-2/delta-1;Isoform of P54289, Isoform 2 of Voltage-dependent calcium channel subunit alpha-2/delta-1;Isoform of P54289, Isoform 3 of Voltage-dependent calcium channel subunit alpha-2/delta-1;Isoform of P54289, Isoform 4 of Voltage-dependent calcium channel subunit alpha-2/delta-1;Isoform of P54289, Isoform 5 of Voltage-dependent calcium channel subun…	CACNA2D1
15957.4	16276	18379.9	18595.1	20092	14914.4	11846.6	17906.6	17815.8	23742.3	16268	17493.8	20459.6	19941	16506.7	11859.7	7738.54	19854.5	9	11	13	13	11	12	8	12	12	12	12	12	12	11	14	7	10	12	Q9HB71	Q9HB71	Homo sapiens	CYBP_HUMAN	Calcyclin-binding protein	CACYBP
27586.6	25677.3	27221.4	29911.7	33318	29263.5	24649.3	33850.4	31112.1	31727.2	25583.1	29905.1	28729.5	40154.4	32650.4	26255.5	20397.2	30132.9	41	43	48	50	47	45	40	47	43	49	35	47	43	30	48	30	37	44	F8VPD4;P27708	F8VPD4;P27708	Homo sapiens	F8VPD4_HUMAN;PYR1_HUMAN	Isoform of P27708, CAD protein;CAD protein	CAD
831.378	NaN	NaN	NaN	NaN	3719.96	NaN	5675.98	NaN	NaN	3558.77	NaN	NaN	NaN	NaN	NaN	16214.6	NaN	1	0	0	0	0	1	0	1	0	0	1	0	0	0	0	0	1	0	A0A087X0T8;A0A087X1W8;A0A0A0MTJ8;F5H125;H0YG94;Q9BY67;Q9BY67-2;Q9BY67-3;Q9BY67-4;Q9BY67-5;X5DQS5	A0A087X0T8;A0A087X1W8;A0A0A0MTJ8;F5H125;H0YG94;Q9BY67;Q9BY67-2;Q9BY67-3;Q9BY67-4;Q9BY67-5;X5DQS5	Homo sapiens	A0A087X0T8_HUMAN;A0A087X1W8_HUMAN;A0A0A0MTJ8_HUMAN;F5H125_HUMAN;H0YG94_HUMAN;CADM1_HUMAN;CADM1_HUMAN;CADM1_HUMAN;CADM1_HUMAN;CADM1_HUMAN;X5DQS5_HUMAN	Isoform of Q9BY67, Cell adhesion molecule 1;Isoform of Q9BY67, Cell adhesion molecule 1;Isoform of Q9BY67, Cell adhesion molecule 1 (Fragment);Isoform of Q9BY67, Cell adhesion molecule 1 (Fragment);Isoform of Q9BY67, Cell adhesion molecule 1 (Fragment);Cell adhesion molecule 1;Isoform of Q9BY67, Isoform 2 of Cell adhesion molecule 1;Isoform of Q9BY67, Isoform 3 of Cell adhesion molecule 1;Isoform…	CADM1
8348.82	22186	3771.9	5406.73	4332.22	14240.9	5987.03	2964.5	26773.1	24842.2	7511.28	9530.61	NaN	4066.87	1553.95	NaN	NaN	15080.7	12	12	10	13	8	13	10	8	15	16	9	12	0	4	5	0	0	15	P22676	P22676	Homo sapiens	CALB2_HUMAN	Calretinin	CALB2
4423.81	6388.95	5802.88	4984.02	5053.57	7536.35	7456.82	2881.25	6625	5187.57	8029.86	6787.18	4674.73	NaN	1172.2	NaN	6171.2	7929.88	1	1	1	1	1	1	1	1	1	1	1	1	1	0	1	0	1	1	Q9P1Z2;Q9P1Z2-2;Q9P1Z2-3;Q9P1Z2-4	Q9P1Z2;Q9P1Z2-2;Q9P1Z2-3;Q9P1Z2-4	Homo sapiens	CACO1_HUMAN	Calcium-binding and coiled-coil domain-containing protein 1;Isoform of Q9P1Z2, Isoform 2 of Calcium-binding and coiled-coil domain-containing protein 1;Isoform of Q9P1Z2, Isoform 3 of Calcium-binding and coiled-coil domain-containing protein 1;Isoform of Q9P1Z2, Isoform 4 of Calcium-binding and coiled-coil domain-containing protein 1	CALCOCO1
187600	152271	301827	208701	166496	309161	154601	291926	206823	127869	229446	270127	131133	185924	252903	143999	766176	240892	54	52	62	63	60	57	51	61	56	57	52	58	55	43	62	48	63	62	Q05682-2;Q05682-6	Q05682-2;Q05682-6	Homo sapiens	CALD1_HUMAN	Isoform of Q05682, Isoform 2 of Caldesmon;Isoform of Q05682, Isoform 6 of Caldesmon	CALD1
3807.27	1564.57	2473.06	2574	2522.28	1327.38	1285.3	1888.59	1478.6	2257.85	846.516	495.346	3296.16	NaN	1002.67	NaN	1161.58	1030.78	1	1	1	1	1	1	1	1	1	1	1	1	1	0	1	0	1	1	Q9HA72;Q9HA72-2;Q9HA72-3	Q9HA72;Q9HA72-2;Q9HA72-3	Homo sapiens	CAHM2_HUMAN	Calcium homeostasis modulator protein 2;Isoform of Q9HA72, Isoform 2 of Calcium homeostasis modulator protein 2;Isoform of Q9HA72, Isoform 3 of Calcium homeostasis modulator protein 2	CALHM2
1102860	901489	1062940	1026220	1032720	1189240	1039520	988056	1080410	981914	1173800	1112560	1068500	927584	1074810	1499880	1312350	1003970	20	20	21	21	21	21	21	21	21	21	19	20	21	18	20	21	20	21	P0DP23;P0DP24;P0DP25	P0DP23;P0DP24;P0DP25	Homo sapiens	CALM1_HUMAN;CALM2_HUMAN;CALM3_HUMAN	Calmodulin-1;Calmodulin-2;Calmodulin-3	CALM1
440971	415058	478149	478266	438089	388072	411139	431793	338501	484016	367485	509577	471982	409531	469037	418350	403762	384749	41	39	62	65	48	47	39	52	51	61	40	58	53	30	61	31	50	49	P27797	P27797	Homo sapiens	CALR_HUMAN	Calreticulin	CALR
685604	614583	632284	680518	512276	515922	709559	576072	440883	516143	693832	605851	570787	404394	522401	734008	774894	477513	47	45	50	50	47	48	49	49	46	48	45	50	47	34	50	39	49	46	O43852;O43852-3	O43852;O43852-3	Homo sapiens	CALU_HUMAN	Calumenin;Isoform of O43852, Isoform 3 of Calumenin	CALU
3870.25	4464.2	5838.01	5376.49	4855.58	4659.16	3966.81	3092.06	3982.86	5088.07	2202.78	4436.71	5538.72	3789.94	4087.72	2209.71	3131.37	3682.3	8	8	8	8	8	8	5	5	8	8	5	8	7	5	8	3	7	8	Q14012	Q14012	Homo sapiens	KCC1A_HUMAN	Calcium/calmodulin-dependent protein kinase type 1	CAMK1
29497.2	23005.3	30596.8	31383.3	22806	24430.4	37460.1	23692.3	26326.5	24740.3	25780.6	19496.9	32118	14498	28108.3	27615.4	33279.7	24546.1	17	16	19	20	18	18	19	17	18	19	13	20	20	12	21	15	19	16	A0A8V8TNA7;A0A8V8TND4;A0A8V8TPK3;E9PBG7;Q13557-10;Q13557-8	A0A8V8TNA7;A0A8V8TND4;A0A8V8TPK3;E9PBG7;Q13557-10;Q13557-8	Homo sapiens	A0A8V8TNA7_HUMAN;A0A8V8TND4_HUMAN;A0A8V8TPK3_HUMAN;E9PBG7_HUMAN;KCC2D_HUMAN;KCC2D_HUMAN	Isoform of Q13557, calcium/calmodulin-dependent protein kinase;Isoform of Q13557, calcium/calmodulin-dependent protein kinase;Isoform of Q13557, calcium/calmodulin-dependent protein kinase;Isoform of Q13557, calcium/calmodulin-dependent protein kinase;Isoform of Q13557, Isoform Delta 10 of Calcium/calmodulin-dependent protein kinase type II subunit delta;Isoform of Q13557, Isoform Delta 6 of Calc…	CAMK2D
6887.29	7584.1	5462.74	6587.05	5335.66	3995.16	4077.81	6502.42	2613.41	5784.6	4134.84	3813.76	7560.11	2166.95	4886.48	7104.8	9322.99	3422.7	2	2	2	2	2	2	2	2	2	2	2	2	2	2	2	2	2	2	Q8WU40	Q8WU40	Homo sapiens	Q8WU40_HUMAN	Isoform of Q13555, calcium/calmodulin-dependent protein kinase (Fragment)	CAMK2G
1019.95	918.226	1165.47	1720.07	1471.58	2049.84	1652.16	607.619	931.348	1679.71	636.909	1584.25	1812.8	NaN	2373.06	NaN	455.575	1186.63	2	1	2	2	2	2	3	3	3	3	1	3	3	0	2	0	1	3	Q5T5Y3;Q5T5Y3-2;Q5T5Y3-3	Q5T5Y3;Q5T5Y3-2;Q5T5Y3-3	Homo sapiens	CAMP1_HUMAN	Calmodulin-regulated spectrin-associated protein 1;Isoform of Q5T5Y3, Isoform 2 of Calmodulin-regulated spectrin-associated protein 1;Isoform of Q5T5Y3, Isoform 3 of Calmodulin-regulated spectrin-associated protein 1	CAMSAP1
1676.41	1006.56	2083.62	2127.04	2352.52	2757.74	1573.31	1007.42	1256.42	1268.13	NaN	1613.98	1360.98	NaN	1663.04	2140.41	714.261	2211.31	3	3	3	4	4	4	2	3	4	3	0	3	3	0	4	2	2	3	Q08AD1;Q08AD1-2;Q08AD1-3	Q08AD1;Q08AD1-2;Q08AD1-3	Homo sapiens	CAMP2_HUMAN	Calmodulin-regulated spectrin-associated protein 2;Isoform of Q08AD1, Isoform 2 of Calmodulin-regulated spectrin-associated protein 2;Isoform of Q08AD1, Isoform 3 of Calmodulin-regulated spectrin-associated protein 2	CAMSAP2
115657	97232.8	117737	107807	98563.9	94878.3	75973.1	83412.3	84555	91981.8	88600.8	89034	93391.2	81159.3	90610.9	86933.2	88432	89118.9	53	52	56	57	51	55	48	51	54	57	47	54	55	41	52	44	50	51	Q86VP6	Q86VP6	Homo sapiens	CAND1_HUMAN	Cullin-associated NEDD8-dissociated protein 1	CAND1
6247.54	7169.11	6225.98	6870.58	6864.62	6121.67	8059.31	6220.94	9171.03	8134.35	5781.7	6738.34	7373.12	8403.73	8428.14	5388.82	4687.72	7388	5	5	5	5	5	5	5	5	5	5	4	5	5	3	5	2	3	5	Q8WVQ1;Q8WVQ1-3	Q8WVQ1;Q8WVQ1-3	Homo sapiens	CANT1_HUMAN	Soluble calcium-activated nucleotidase 1;Isoform of Q8WVQ1, Isoform 3 of Soluble calcium-activated nucleotidase 1	CANT1
197306	165391	190246	195836	201566	188764	229152	155995	166851	189088	184188	212491	185018	207763	186191	198635	166627	192736	39	43	53	55	45	45	42	46	46	54	45	54	47	35	55	37	48	43	A0A7P0TAE9;P27824;P27824-2	A0A7P0TAE9;P27824;P27824-2	Homo sapiens	A0A7P0TAE9_HUMAN;CALX_HUMAN;CALX_HUMAN	Isoform of P27824, Calnexin;Calnexin;Isoform of P27824, Isoform 2 of Calnexin	CANX
296521	354302	372429	330746	288738	342057	324327	330395	313978	314333	354538	304197	287455	339213	285061	350618	382686	298210	44	48	53	55	48	48	42	50	48	53	43	47	51	37	50	38	49	47	Q01518-2	Q01518-2	Homo sapiens	CAP1_HUMAN	Isoform of Q01518, Isoform 2 of Adenylyl cyclase-associated protein 1	CAP1
7452.74	10666.6	9557.23	9243.79	5436.19	15668.5	6338.88	22277.5	9883.32	10683.1	24037.7	9839.14	12076.6	17938.5	13005	18754.9	42284.7	12703.1	6	8	11	10	8	11	7	10	10	10	11	10	11	8	11	10	11	11	P40123	P40123	Homo sapiens	CAP2_HUMAN	Adenylyl cyclase-associated protein 2	CAP2
63834.5	99715.9	25243	49831.5	57821.2	7501.77	50487.3	66287.5	70809.9	137744	183920	58268.2	156009	35006.9	60116.9	40303.7	134879	73019.2	17	16	14	14	15	7	11	16	16	18	17	13	18	8	17	10	15	14	P40121	P40121	Homo sapiens	CAPG_HUMAN	Macrophage-capping protein	CAPG
61660.4	69411.7	60207.7	67292.7	58236.1	63922.2	64614	69540.6	54368.6	63984.7	76649.6	55176.2	63808.2	68333.7	78031.1	72198.5	104823	47925.3	29	25	31	31	26	26	27	29	27	34	22	30	32	19	33	23	31	26	P07384	P07384	Homo sapiens	CAN1_HUMAN	Calpain-1 catalytic subunit	CAPN1
66165.6	66310.6	80199.9	77130.9	62236.9	69961.7	82902.9	69557	67474	80645.1	77831.5	72473.5	70424.8	72521.9	67458.9	92804.7	99615.3	67841.2	31	29	45	45	32	34	31	37	36	45	29	32	41	22	37	25	41	37	P17655	P17655	Homo sapiens	CAN2_HUMAN	Calpain-2 catalytic subunit	CAPN2
14154	8118.7	6123.51	8928.31	10075.6	4740.28	8128.62	9851.76	6190.13	7358.71	7430.2	9475.88	9967.48	4761.83	9908.83	6675.83	10482.8	5604.18	10	7	9	10	9	5	8	9	6	9	7	9	9	5	10	3	8	6	E7EV01;O15484	E7EV01;O15484	Homo sapiens	E7EV01_HUMAN;CAN5_HUMAN	Isoform of O15484, Calpain 5;Calpain-5	CAPN5
3653.7	4251.31	1848.56	3715.59	3631.19	4749.42	3999.3	2989.1	3075.72	2470.44	2847.84	3472.21	2731.7	808.603	2648.05	3630.03	2789.14	3117.99	3	3	4	4	4	4	3	3	4	1	2	3	3	1	3	2	3	4	Q9Y6W3	Q9Y6W3	Homo sapiens	CAN7_HUMAN	Calpain-7	CAPN7
52568.2	54803.8	62451.8	67077.9	58055.2	58608.9	54877.5	64973.9	62236.4	62133	59989.3	51592.8	63376	61663.5	48902.1	63795.6	76246.9	53131.7	14	13	17	18	14	15	15	16	16	18	13	15	16	12	17	12	17	14	A0A0C4DGQ5;P04632	A0A0C4DGQ5;P04632	Homo sapiens	A0A0C4DGQ5_HUMAN;CPNS1_HUMAN	Isoform of P04632, Calpain small subunit 1;Calpain small subunit 1	CAPNS1
61288.3	54412.1	59310.9	59324	71981	49730.7	52732.6	68177.9	62845.2	72257.2	48581.3	65086.7	66276.3	50417	65129	35148.3	39015.8	60821.5	22	20	24	22	22	20	18	21	21	23	19	24	22	19	24	16	23	21	Q14444;Q14444-2	Q14444;Q14444-2	Homo sapiens	CAPR1_HUMAN	Caprin-1;Isoform of Q14444, Isoform 2 of Caprin-1	CAPRIN1
4924.41	6834.17	NaN	4530.6	2400.06	4210.02	5903.18	2679.55	1282.19	2706.36	1534.35	2737.44	10178.8	NaN	5822.69	2872.16	6126.64	1965.71	6	6	0	6	3	3	6	6	2	4	5	5	6	0	6	3	6	3	Q13938;Q13938-4	Q13938;Q13938-4	Homo sapiens	CAYP1_HUMAN	Calcyphosin;Isoform of Q13938, Isoform 3 of Calcyphosin	CAPS
9183.57	15085.5	NaN	NaN	19773.2	NaN	NaN	14314.6	14871.1	NaN	7172.67	NaN	21327.5	19250.5	18174.5	8217.61	12576.4	NaN	1	1	0	0	1	0	0	1	1	0	1	0	1	1	1	1	1	0	A0A8V8TPT3;B9A061;Q9BXY5;Q9BXY5-2;Q9BXY5-3	A0A8V8TPT3;B9A061;Q9BXY5;Q9BXY5-2;Q9BXY5-3	Homo sapiens	A0A8V8TPT3_HUMAN;B9A061_HUMAN;CAYP2_HUMAN;CAYP2_HUMAN;CAYP2_HUMAN	Isoform of Q9BXY5, Calcyphosine 2;Isoform of Q9BXY5, Calcyphosine 2;Calcyphosin-2;Isoform of Q9BXY5, Isoform 2 of Calcyphosin-2;Isoform of Q9BXY5, Isoform 3 of Calcyphosin-2	CAPS2
161958	157277	150833	154920	160463	164683	152784	158087	153516	143349	184727	156463	164614	172000	152381	223126	208564	163576	16	15	17	17	16	17	15	17	17	17	15	15	17	15	17	16	16	17	P52907	P52907	Homo sapiens	CAZA1_HUMAN	F-actin-capping protein subunit alpha-1	CAPZA1
181436	168823	160247	169076	159274	160290	148604	145156	139306	152658	196983	142627	161857	159286	152574	219034	213041	151968	12	12	15	16	12	14	14	13	15	15	11	15	14	8	14	12	14	11	P47755	P47755	Homo sapiens	CAZA2_HUMAN	F-actin-capping protein subunit alpha-2	CAPZA2
138407	123881	150329	156270	134449	140199	126231	134472	123427	134537	151224	119874	156063	142766	116645	166575	151075	123749	17	18	23	23	18	22	20	23	22	23	17	18	23	16	21	16	23	21	B1AK88;P47756	B1AK88;P47756	Homo sapiens	B1AK88_HUMAN;CAPZB_HUMAN	Isoform of P47756, F-actin-capping protein subunit beta;F-actin-capping protein subunit beta	CAPZB
1138.97	380.647	741.283	661.788	1841.73	526.967	NaN	NaN	743.11	241.887	1227.07	NaN	NaN	NaN	157.343	NaN	442.339	1283.15	1	1	1	1	1	1	0	0	1	1	1	0	0	0	1	0	1	1	Q9BX69	Q9BX69	Homo sapiens	CARD6_HUMAN	Caspase recruitment domain-containing protein 6	CARD6
NaN	NaN	NaN	NaN	NaN	NaN	NaN	3134.51	NaN	NaN	NaN	NaN	NaN	NaN	NaN	NaN	2025.74	NaN	0	0	0	0	0	0	0	1	0	0	0	0	0	0	0	0	1	0	Q9H257;Q9H257-2;Q9H257-3	Q9H257;Q9H257-2;Q9H257-3	Homo sapiens	CARD9_HUMAN	Caspase recruitment domain-containing protein 9;Isoform of Q9H257, Isoform 2 of Caspase recruitment domain-containing protein 9;Isoform of Q9H257, Isoform 3 of Caspase recruitment domain-containing protein 9	CARD9
32199.5	29670.8	21777.3	26491	34050	28240.7	24669.7	28683	25985.7	23396.8	27557.3	26974.1	32108.6	29357.1	23048.9	24845.7	27007.1	27283.3	6	6	7	7	7	7	7	7	7	7	7	7	7	5	7	6	7	7	Q9Y2V2	Q9Y2V2	Homo sapiens	CHSP1_HUMAN	Calcium-regulated heat-stable protein 1	CARHSP1
15840.4	17448	12809.1	15444.4	14379.7	14889	11856.9	16016.2	12459.8	17857.9	11319.2	11562.9	17084.9	14290.8	14420.6	16640.9	12268.8	9336.85	10	10	11	11	10	10	9	10	10	11	9	10	10	9	9	9	10	10	Q86X55;Q86X55-1	Q86X55;Q86X55-1	Homo sapiens	CARM1_HUMAN	Histone-arginine methyltransferase CARM1;Isoform of Q86X55, Isoform 1 of Histone-arginine methyltransferase CARM1	CARM1
1210.95	NaN	1950.73	814.749	530.981	1402.1	NaN	NaN	965.159	NaN	NaN	NaN	NaN	NaN	618.677	NaN	1131.66	697.548	2	0	5	3	2	1	0	0	1	0	0	0	0	0	1	0	1	1	A0A8V8TRE2;Q5VZK9;Q5VZK9-2	A0A8V8TRE2;Q5VZK9;Q5VZK9-2	Homo sapiens	A0A8V8TRE2_HUMAN;CARL1_HUMAN;CARL1_HUMAN	Isoform of Q5VZK9, Capping protein regulator and myosin 1 linker 1;F-actin-uncapping protein LRRC16A;Isoform of Q5VZK9, Isoform 2 of F-actin-uncapping protein LRRC16A	CARMIL1
2653.77	1964.87	2581.31	1186.53	3486.93	NaN	NaN	2877.71	2067.15	2763.37	NaN	3169.83	2213.15	NaN	1519.3	NaN	NaN	1963.07	3	2	1	3	3	0	0	2	2	3	0	2	3	0	2	0	0	2	A0A8Q3SIB7;A0A8Q3SII9;A0A8Q3WKY0;Q6F5E8;Q6F5E8-2	A0A8Q3SIB7;A0A8Q3SII9;A0A8Q3WKY0;Q6F5E8;Q6F5E8-2	Homo sapiens	A0A8Q3SIB7_HUMAN;A0A8Q3SII9_HUMAN;A0A8Q3WKY0_HUMAN;CARL2_HUMAN;CARL2_HUMAN	Isoform of Q6F5E8, Capping protein regulator and myosin 1 linker 2;Isoform of Q6F5E8, Capping protein regulator and myosin 1 linker 2;Isoform of Q6F5E8, Capping protein regulator and myosin 1 linker 2;Capping protein, Arp2/3 and myosin-I linker protein 2;Isoform of Q6F5E8, Isoform 2 of Capping protein, Arp2/3 and myosin-I linker protein 2	CARMIL2
194.805	414.373	362.733	336.826	336.844	289.212	NaN	827.22	152.015	296.586	0.772742	NaN	690.156	1.30751	NaN	NaN	NaN	NaN	1	1	1	1	1	1	0	1	1	1	1	0	1	1	0	0	0	0	Q5T8U9;Q5T8V1;Q8N4J0	Q5T8U9;Q5T8V1;Q8N4J0	Homo sapiens	Q5T8U9_HUMAN;Q5T8V1_HUMAN;CARME_HUMAN	Isoform of Q8N4J0, Carnosine N-methyltransferase 1;Isoform of Q8N4J0, Carnosine N-methyltransferase (Fragment);Carnosine N-methyltransferase	CARNMT1
47444.4	38942.3	40429.9	37180.2	32234.2	43654	31940.9	33023.9	32521.1	28014.7	31885.9	27097.3	30721.7	36874.5	34737.3	33215.7	31856.6	43674.9	33	32	36	36	30	31	29	32	31	33	26	31	34	25	33	27	34	33	P49589-3	P49589-3	Homo sapiens	SYCC_HUMAN	Isoform of P49589, Isoform 3 of Cysteine--tRNA ligase, cytoplasmic	CARS1
8591.73	8077.36	11015.6	12649.1	10794.8	8114.94	13590.2	8284.71	10927.4	11189.6	10949.6	7899.36	9471.69	4954.29	8144.01	25365.7	10688.4	7573.84	9	7	13	12	11	12	12	11	12	13	9	12	11	6	12	9	11	10	Q9HA77	Q9HA77	Homo sapiens	SYCM_HUMAN	Probable cysteine--tRNA ligase, mitochondrial	CARS2
4856.92	3571.66	2968.88	2063.1	3119.27	2675.54	3797.12	3036.53	2201.93	2415.62	4823.29	2782.05	2851.68	2755.72	2500.16	5851.39	4746.27	2516.13	6	6	6	6	5	6	4	5	5	6	4	6	6	4	5	4	5	5	A0A2R8Y6F8;A0A2R8YE77;A0A2R8YFN5;A0A2U3TZM1;A0A2U3TZM4;A0A2U3TZN6;A0A7I2RJN6;O14936;O14936-2;O14936-3;O14936-4;O14936-6;Q5JS79	A0A2R8Y6F8;A0A2R8YE77;A0A2R8YFN5;A0A2U3TZM1;A0A2U3TZM4;A0A2U3TZN6;A0A7I2RJN6;O14936;O14936-2;O14936-3;O14936-4;O14936-6;Q5JS79	Homo sapiens	A0A2R8Y6F8_HUMAN;A0A2R8YE77_HUMAN;A0A2R8YFN5_HUMAN;A0A2U3TZM1_HUMAN;A0A2U3TZM4_HUMAN;A0A2U3TZN6_HUMAN;A0A7I2RJN6_HUMAN;CSKP_HUMAN;CSKP_HUMAN;CSKP_HUMAN;CSKP_HUMAN;CSKP_HUMAN;Q5JS79_HUMAN	Isoform of O14936, Calcium/calmodulin dependent serine protein kinase;Isoform of O14936, Calcium/calmodulin dependent serine protein kinase;Isoform of O14936, Calcium/calmodulin dependent serine protein kinase;Isoform of O14936, Calcium/calmodulin dependent serine protein kinase;Isoform of O14936, Calcium/calmodulin dependent serine protein kinase;Isoform of O14936, Calcium/calmodulin dependent s…	CASK
1884.57	1115.72	NaN	720.288	2046.99	NaN	NaN	2362.45	458.804	1400.48	NaN	NaN	1547.65	NaN	837.244	NaN	NaN	NaN	1	1	0	1	1	0	0	1	1	1	0	0	1	0	1	0	0	0	Q8WXE0;Q8WXE0-2	Q8WXE0;Q8WXE0-2	Homo sapiens	CSKI2_HUMAN	Caskin-2;Isoform of Q8WXE0, Isoform 2 of Caskin-2	CASKIN2
2796.65	360.779	832.519	1675.67	742.653	1106.17	NaN	2371.37	NaN	NaN	1922.03	1428.5	1298.15	NaN	1608.29	5567.03	4904.56	NaN	1	1	2	2	1	1	0	2	0	0	1	2	1	0	2	2	1	0	A0A8Q3SIY2;G3V169;P29466;P29466-2	A0A8Q3SIY2;G3V169;P29466;P29466-2	Homo sapiens	A0A8Q3SIY2_HUMAN;G3V169_HUMAN;CASP1_HUMAN;CASP1_HUMAN	Isoform of P29466, Caspase 1;Isoform of P29466, Caspase 1;Caspase-1;Isoform of P29466, Isoform Beta of Caspase-1	CASP1
440.572	NaN	NaN	1093.94	NaN	NaN	563.901	NaN	NaN	591.392	NaN	NaN	1182.7	NaN	738.635	1201.14	1419.58	671.096	1	0	0	1	0	0	1	0	0	1	0	0	1	0	1	1	1	1	Q92851-2;Q92851-4;Q92851-6	Q92851-2;Q92851-4;Q92851-6	Homo sapiens	CASPA_HUMAN	Isoform of Q92851, Isoform B of Caspase-10;Isoform of Q92851, Isoform D of Caspase-10;Isoform of Q92851, Isoform 6 of Caspase-10	CASP10
6438.06	6516.15	9545.52	8985.38	5976.58	7685.19	5148.4	7001.77	6984.25	8018.74	6366.8	6911.45	6893.21	7220.41	4660.81	2896.16	3786.03	8566.98	7	6	8	8	7	7	7	8	7	8	6	7	7	4	8	4	6	7	P42574	P42574	Homo sapiens	CASP3_HUMAN	Caspase-3	CASP3
2823.32	2090.44	3398.36	2457.35	2260.94	4017.39	4488.67	2217.21	3031.77	1799.74	2356.04	3013.82	2660.72	3692.78	2192.23	3030.58	2706.72	3141.99	5	5	5	5	4	5	4	4	5	5	4	5	5	3	5	4	5	5	P49662;P49662-2	P49662;P49662-2	Homo sapiens	CASP4_HUMAN	Caspase-4;Isoform of P49662, Isoform 2 of Caspase-4	CASP4
2305.44	2366.69	2549.23	3104.86	2867.69	2232.25	3726.3	6343.52	5761.07	4618.77	5796.12	2658.31	4467.5	1624.38	3769.86	4830.56	2361.24	4139.73	2	1	1	1	1	1	1	1	2	2	1	2	1	2	2	1	1	1	P55212;P55212-2	P55212;P55212-2	Homo sapiens	CASP6_HUMAN	Caspase-6;Isoform of P55212, Isoform Beta of Caspase-6	CASP6
7808.25	6534.18	4100.56	4939.17	5533.42	4808.59	4064.43	4515.94	4617.16	5458.93	3954.07	5222.6	3646.73	5185.18	5032.28	4891.4	4800.27	7115.68	3	3	2	3	3	3	2	3	3	3	2	3	3	2	3	2	3	3	P55210;P55210-3	P55210;P55210-3	Homo sapiens	CASP7_HUMAN	Caspase-7;Isoform of P55210, Isoform Alpha' of Caspase-7	CASP7
7877.95	4830.43	4794.21	5475.19	6568.44	3168.68	3437.01	5445.3	4767.16	5069.77	3792.37	4693.05	8323.56	6148.49	6007.26	4411.3	6745.54	4695.21	2	3	3	3	3	3	2	3	2	3	1	2	3	1	3	1	3	3	A0A8Q3SI66;A0A8Q3SID9;A0A8Q3WKY8;E7EQ01;E7EQ06;E7ETB7;E7EVN1;Q14790;Q14790-2;Q14790-3;Q14790-4;Q14790-5;Q14790-6;Q14790-7;Q14790-8;Q14790-9	A0A8Q3SI66;A0A8Q3SID9;A0A8Q3WKY8;E7EQ01;E7EQ06;E7ETB7;E7EVN1;Q14790;Q14790-2;Q14790-3;Q14790-4;Q14790-5;Q14790-6;Q14790-7;Q14790-8;Q14790-9	Homo sapiens	A0A8Q3SI66_HUMAN;A0A8Q3SID9_HUMAN;A0A8Q3WKY8_HUMAN;E7EQ01_HUMAN;E7EQ06_HUMAN;E7ETB7_HUMAN;E7EVN1_HUMAN;CASP8_HUMAN;CASP8_HUMAN;CASP8_HUMAN;CASP8_HUMAN;CASP8_HUMAN;CASP8_HUMAN;CASP8_HUMAN;CASP8_HUMAN;CASP8_HUMAN	Isoform of Q14790, Caspase 8 (Fragment);Isoform of Q14790, Caspase 8;Isoform of Q14790, Caspase 8;Isoform of Q14790, Caspase 8 (Fragment);Isoform of Q14790, Caspase-8 (Fragment);Isoform of Q14790, Caspase-8 (Fragment);Isoform of Q14790, Caspase-8 (Fragment);Caspase-8;Isoform of Q14790, Isoform 2 of Caspase-8;Isoform of Q14790, Isoform 3 of Caspase-8;Isoform of Q14790, Isoform 4 of Caspase-8;Isofo…	CASP8
11518.2	11656.2	10419.2	11201.9	9309.65	11250	14261.9	15381.8	10479.7	10071.7	10536.6	5966.95	13408.8	NaN	6414.02	6815.3	14100.6	9892.89	2	1	2	2	2	1	1	1	2	2	1	1	2	0	1	1	2	2	D6RBR1	D6RBR1	Homo sapiens	D6RBR1_HUMAN	Isoform of P20810, Calpastatin (Fragment)	CAST
1351.13	2163.18	1050.41	1137.2	561.006	604.818	440.978	171.7	476.47	734.85	0.589179	551.576	1782.4	0.994295	272.972	351.896	1.10365	627.359	2	3	3	3	3	3	2	2	3	3	1	2	3	1	3	1	2	3	A6NHX0	A6NHX0	Homo sapiens	CAST2_HUMAN	Cytosolic arginine sensor for mTORC1 subunit 2	CASTOR2
24782.7	36486.2	20375.6	26043.4	25708.5	19071.1	18010.6	30731.1	21155	25104.2	28203.5	24239.1	40740.6	18050.4	30244.2	18629	24514.7	18733.3	36	36	38	39	35	35	31	38	33	40	33	36	38	24	40	24	35	34	P04040	P04040	Homo sapiens	CATA_HUMAN	Catalase	CAT
15775.7	14462	12688.4	9638.9	NaN	12091.4	18760.7	12385	6346.68	9455.07	11859.6	17047.9	14743.6	8312.37	9878.37	15946.6	11829.9	12226.2	1	1	1	1	0	1	1	1	1	1	1	1	1	1	1	1	1	1	C9JKI3;Q03135-2	C9JKI3;Q03135-2	Homo sapiens	C9JKI3_HUMAN;CAV1_HUMAN	Isoform of Q03135, Caveolin (Fragment);Isoform of Q03135, Isoform 2 of Caveolin-1	CAV1
9057.64	6052.23	6647.08	4886.34	6168.43	7241.69	9621.08	7401.87	6663.27	4839.15	8943.95	16117	4858.81	3328.88	7342.77	7501.9	8120.69	6382.26	3	3	3	3	3	3	3	3	3	3	3	3	3	2	3	3	3	3	E9PCT3;P51636;P51636-2	E9PCT3;P51636;P51636-2	Homo sapiens	E9PCT3_HUMAN;CAV2_HUMAN;CAV2_HUMAN	Isoform of P51636, Caveolin;Caveolin-2;Isoform of P51636, Isoform Beta of Caveolin-2	CAV2
187881	220074	199870	169841	113365	171237	180978	166751	143912	162028	160651	247795	234054	170450	194192	153556	188804	174669	27	25	27	27	23	27	27	27	25	27	21	25	26	22	25	22	25	26	Q6NZI2	Q6NZI2	Homo sapiens	CAVN1_HUMAN	Caveolae-associated protein 1	CAVIN1
42563.3	38029.6	49272.1	29436.5	70806.3	52521.4	24830.5	33815.1	28802.9	26218.2	20820.7	48612.2	38476.9	26647.4	26970	17217.9	33801.9	44527.9	7	2	7	7	3	7	6	3	6	7	3	7	7	1	6	1	7	7	O95810	O95810	Homo sapiens	CAVN2_HUMAN	Caveolae-associated protein 2	CAVIN2
56456.4	60376	47302.4	45745.6	31376.6	37664.6	40223.6	45811.6	35483	39802.2	41379.3	58168.3	60762.5	45289.4	45780.2	32473.4	32518.2	38691.1	11	10	10	10	10	11	10	10	10	10	10	10	10	10	10	10	10	10	Q969G5	Q969G5	Homo sapiens	CAVN3_HUMAN	Caveolae-associated protein 3	CAVIN3
11122.9	15230.1	16013.9	10539	16327.4	16013.9	12831	17373.7	14997.8	10021.9	13387.9	16721.4	8951.99	16064.4	12207.7	10588.5	11239.6	16269.3	1	1	1	1	1	1	1	1	1	1	1	1	1	1	1	1	1	1	J3KS23	J3KS23	Homo sapiens	J3KS23_HUMAN	Isoform of Q13951, Core-binding factor subunit beta	CBFB
15523.1	11981.2	9976.21	11418.6	17291.1	12836.9	NaN	11725.8	10791.8	14649.3	NaN	9589.37	12809.8	4887.42	10271.6	NaN	12931.9	13332.8	4	2	6	5	5	6	0	2	4	6	0	5	5	1	5	0	3	6	P22681	P22681	Homo sapiens	CBL_HUMAN	E3 ubiquitin-protein ligase CBL	CBL
132318	140803	111400	75141	88187.3	128228	111576	134694	113870	111594	146495	66415.6	131989	143265	122742	148108	171790	121048	20	19	21	21	20	21	20	21	21	22	20	21	21	17	21	18	20	19	P16152	P16152	Homo sapiens	CBR1_HUMAN	Carbonyl reductase [NADPH] 1	CBR1
9125.88	7480.19	8075.64	11198.2	8308.33	8777.35	4180.37	11193.1	5496.8	9052.7	7511.14	7753.96	13065.6	9150.39	9710.84	5932.64	6658.93	4441.26	11	10	12	12	11	11	9	11	10	12	7	9	10	7	11	6	9	9	O75828	O75828	Homo sapiens	CBR3_HUMAN	Carbonyl reductase [NADPH] 3	CBR3
7552.99	1146	3859.1	3167.79	8295.49	8905.05	1216.31	6827.45	3661.28	5904.93	NaN	8441.23	583.429	4622.7	2079.1	NaN	423.927	6026.82	2	2	2	2	2	2	2	2	2	2	0	2	2	2	2	0	1	2	P35520;P35520-2	P35520;P35520-2	Homo sapiens	CBS_HUMAN	Cystathionine beta-synthase;Isoform of P35520, Isoform 2 of Cystathionine beta-synthase	CBS
26453.9	20623.4	17929.8	23769.3	27954	19898.7	14241.5	23113.6	23538.1	19962.5	16519.6	22817.3	24914.6	28849.5	18429.9	14565.9	9318.08	29157	3	3	3	3	3	3	2	3	3	3	2	3	3	3	3	1	3	3	B5MD17;J3KS05;P83916	B5MD17;J3KS05;P83916	Homo sapiens	B5MD17_HUMAN;J3KS05_HUMAN;CBX1_HUMAN	Isoform of P83916, Chromobox 1 (Fragment);Isoform of P83916, Chromobox 1 (Fragment);Chromobox protein homolog 1	CBX1
15592.8	11759	13920	14898.4	15597	11054.4	7070.24	15205.1	13446.2	11093.1	11219.6	12003.4	13352.5	13249.9	11281.5	5074.07	7362.44	15645.7	7	7	9	9	8	8	6	9	9	9	6	8	9	8	9	6	7	9	Q13185	Q13185	Homo sapiens	CBX3_HUMAN	Chromobox protein homolog 3	CBX3
NaN	8989.75	NaN	NaN	13494.4	NaN	66311.2	NaN	NaN	3762.64	72866.2	16354.3	NaN	92864.8	NaN	28107.1	44272.6	187023	0	1	0	0	1	0	1	0	0	1	1	1	0	1	0	1	1	1	O00257	O00257	Homo sapiens	CBX4_HUMAN	E3 SUMO-protein ligase CBX4	CBX4
8442.2	3658.31	4919.71	5778.03	7907.39	3765.63	2170.01	7776.23	4311.47	2941.73	4120.48	5390.25	4747.34	8877.02	3557.68	2444.74	1979.97	5231.48	3	3	3	4	3	3	2	3	4	3	2	3	3	2	4	2	3	3	P45973	P45973	Homo sapiens	CBX5_HUMAN	Chromobox protein homolog 5	CBX5
3058.73	3229.88	3981.66	3707.53	2884.01	3491.58	3317.12	2340.11	3119.23	3032.14	2844.82	3351.6	2818.28	1881.73	2983.74	2858.98	2370.79	3264.18	7	7	9	9	8	8	7	7	6	8	7	8	8	3	8	3	7	9	Q6P1N0;Q6P1N0-2	Q6P1N0;Q6P1N0-2	Homo sapiens	C2D1A_HUMAN	Coiled-coil and C2 domain-containing protein 1A;Isoform of Q6P1N0, Isoform 2 of Coiled-coil and C2 domain-containing protein 1A	CC2D1A
4227.99	7035.16	4545.27	4471.85	4578.4	4956.81	6276.92	4963.84	5864.71	4580.21	7051.37	7967.45	5541.57	15481.2	5634.82	8930.22	4376.98	4389.24	3	4	4	4	3	4	4	4	4	5	3	5	3	2	5	4	4	3	H7C1U3;Q5T0F9;Q5T0F9-2	H7C1U3;Q5T0F9;Q5T0F9-2	Homo sapiens	H7C1U3_HUMAN;C2D1B_HUMAN;C2D1B_HUMAN	Isoform of Q5T0F9, Coiled-coil and C2 domain containing 1B (Fragment);Coiled-coil and C2 domain-containing protein 1B;Isoform of Q5T0F9, Isoform 2 of Coiled-coil and C2 domain-containing protein 1B	CC2D1B
14023.1	10809	11969.4	13405	13070.7	10073.1	5555.98	13996	12667.6	12655.9	8837.17	12101.6	15036.4	9224.31	12176.5	9191.34	7395.44	12299	13	12	14	14	11	12	10	13	12	13	9	14	14	7	12	7	12	12	Q8IX12;Q8IX12-2	Q8IX12;Q8IX12-2	Homo sapiens	CCAR1_HUMAN	Cell division cycle and apoptosis regulator protein 1;Isoform of Q8IX12, Isoform 2 of Cell division cycle and apoptosis regulator protein 1	CCAR1
17229.6	13388.2	12284.6	13091	14592.3	13167.2	10297.4	14441	13211.3	18002.5	12523.6	16024.6	18550.2	15273.3	16255.5	11388.9	5336.71	14430.4	1	1	1	1	1	1	1	1	1	1	1	1	1	1	1	1	1	1	E5RFJ3	E5RFJ3	Homo sapiens	E5RFJ3_HUMAN	Isoform of Q8N163, Cell cycle and apoptosis regulator 2 (Fragment)	CCAR2
616.644	1218.02	637.396	560.311	583.711	1000.83	1254.45	851.046	991	420.353	1313.56	1325.87	477.534	NaN	590.049	NaN	325.328	791.533	1	1	1	1	1	1	1	1	1	1	1	1	1	0	1	0	1	1	A0A494C037;E7EUS2;Q8TBZ0;Q8TBZ0-2	A0A494C037;E7EUS2;Q8TBZ0;Q8TBZ0-2	Homo sapiens	A0A494C037_HUMAN;E7EUS2_HUMAN;CC110_HUMAN;CC110_HUMAN	Isoform of Q8TBZ0, Coiled-coil domain containing 110;Isoform of Q8TBZ0, Coiled-coil domain containing 110;Coiled-coil domain-containing protein 110;Isoform of Q8TBZ0, Isoform 2 of Coiled-coil domain-containing protein 110	CCDC110
6378.14	4920.08	5232.4	4702.75	7722.83	7505.65	6989.05	8597.74	5300.12	3787	4072.55	6575.48	NaN	NaN	9730.7	3715.53	NaN	3118.85	2	3	3	3	3	3	3	2	2	3	3	3	0	0	4	2	0	3	Q96NT0	Q96NT0	Homo sapiens	CC115_HUMAN	Coiled-coil domain-containing protein 115	CCDC115
12827.7	12213.4	13400.6	13941.1	13591.3	11160.2	12716.1	10660.8	10811.4	13359	9893.4	12549.6	11912.4	13225.4	11713.3	8470	8387.33	14265.6	17	17	21	19	18	18	18	18	14	17	13	18	19	8	17	10	15	17	Q96CT7	Q96CT7	Homo sapiens	CC124_HUMAN	Coiled-coil domain-containing protein 124	CCDC124
4298.21	1703.21	4304.06	5355.98	4615.95	2487.28	1657.34	4641.01	3186.61	5119.48	3766.95	3785.26	3166.24	NaN	2547.95	2729.31	2577.01	1988.35	4	3	4	4	3	2	1	4	4	4	2	4	3	0	2	1	2	2	Q9H6E4	Q9H6E4	Homo sapiens	CC134_HUMAN	Coiled-coil domain-containing protein 134	CCDC134
3701.49	NaN	2256.43	5638.76	2889.76	3628.68	NaN	556.882	2996.19	5262.26	1705.17	NaN	4911.21	NaN	NaN	1668.12	NaN	2851.72	1	0	1	1	1	1	0	1	1	1	1	0	1	0	0	1	0	1	I3L0U5;Q6PK04	I3L0U5;Q6PK04	Homo sapiens	I3L0U5_HUMAN;CC137_HUMAN	Isoform of Q6PK04, Coiled-coil domain containing 137 (Fragment);Coiled-coil domain-containing protein 137	CCDC137
7031.09	3571.04	NaN	NaN	22585.1	NaN	NaN	1258.17	12891.1	NaN	4476.89	NaN	9245.03	18766.7	11689.9	4767.54	11294.3	NaN	1	2	0	0	1	0	0	2	2	0	1	0	2	1	2	1	2	0	A0A0A0MTQ8;P0C221	A0A0A0MTQ8;P0C221	Homo sapiens	A0A0A0MTQ8_HUMAN;CC175_HUMAN	Isoform of P0C221, Coiled-coil domain containing 175;Coiled-coil domain-containing protein 175	CCDC175
9274.73	8981.02	8527.55	9130.93	8138.91	8259.43	8630.36	7970.71	6949.4	7520.41	9782.31	7259.94	8414.22	7009.56	6344.59	11092.4	8355.52	8147.61	15	14	14	13	13	12	11	14	11	12	12	11	13	9	15	10	14	13	O60826	O60826	Homo sapiens	CCD22_HUMAN	Coiled-coil domain-containing protein 22	CCDC22
4570.18	4043.35	4585.29	4654.43	3975.83	4446.3	3726.6	4860.35	4517.26	4418.38	3039.4	4190.32	3252.37	3459.62	3783.21	3277.44	3305.57	3340.52	7	7	7	7	7	7	6	7	7	7	6	7	6	6	7	7	6	6	Q86WR0	Q86WR0	Homo sapiens	CCD25_HUMAN	Coiled-coil domain-containing protein 25	CCDC25
4793.97	3810.45	3934.62	4765.77	5800.93	3683	3136.79	3103.3	1668.89	3552.48	3656.74	5122.82	1678.99	3866.76	3980.56	4941.65	4304.03	4939.84	2	1	3	3	2	2	3	2	3	3	3	3	3	2	3	1	3	2	Q86WV7;Q96MW1	Q86WV7;Q96MW1	Homo sapiens	Q86WV7_HUMAN;CCD43_HUMAN	Isoform of Q96MW1, Coiled-coil domain-containing protein 43;Coiled-coil domain-containing protein 43	CCDC43
17334.8	14066.5	13134.5	15246.4	16239.9	14097.9	17700.4	12413.5	14931.1	13366.7	11557.7	14689.4	12896.3	15619.1	14071.9	13048.4	11901.7	16366.1	23	19	24	25	24	23	23	24	21	24	18	23	23	16	24	15	18	25	Q96A33	Q96A33	Homo sapiens	CCD47_HUMAN	PAT complex subunit CCDC47	CCDC47
8327.63	9211.15	17293.2	11322	9004.95	11359.7	11647.6	12430.3	11989.2	10558.9	8776.29	10588.3	9285.93	10992.8	9153.86	9229.7	13121.2	8960.89	9	9	9	8	9	9	8	9	9	9	8	8	9	5	7	7	9	9	Q8IVM0;Q8IVM0-2	Q8IVM0;Q8IVM0-2	Homo sapiens	CCD50_HUMAN	Coiled-coil domain-containing protein 50;Isoform of Q8IVM0, Isoform 2 of Coiled-coil domain-containing protein 50	CCDC50
2946.98	1136.99	1123.73	1768.95	4035.72	1317.23	1813.62	2035.53	2818.09	2336.86	796.87	2478.27	2508.97	NaN	2938.02	2025.04	2464.3	1592.12	1	1	1	1	1	1	1	1	1	1	1	1	1	0	1	1	1	1	Q96ER9;Q96ER9-2	Q96ER9;Q96ER9-2	Homo sapiens	MITOK_HUMAN	Mitochondrial potassium channel;Isoform of Q96ER9, Isoform 2 of Mitochondrial potassium channel	CCDC51
16810.3	16615.2	17619.2	18475.7	15777.5	17378.5	13699.5	19041.6	16297.8	20989.4	15965.6	16495.1	18650	17159.8	16942.3	18761.2	20322.3	17106	17	18	20	20	18	18	15	17	16	20	16	19	19	12	19	13	17	18	Q16204	Q16204	Homo sapiens	CCDC6_HUMAN	Coiled-coil domain-containing protein 6	CCDC6
998.073	422.097	3258.81	3486.03	671.028	804.294	NaN	699.115	NaN	NaN	NaN	2229.54	NaN	NaN	3464.06	NaN	NaN	2085.87	2	1	1	2	2	1	0	2	0	0	0	2	0	0	2	0	0	2	A0A8V8TMN3;Q9H0W5	A0A8V8TMN3;Q9H0W5	Homo sapiens	A0A8V8TMN3_HUMAN;CCDC8_HUMAN	Isoform of Q9H0W5, Coiled-coil domain containing 8;Coiled-coil domain-containing protein 8	CCDC8
28502.4	16956.9	16138.2	16555.2	23309.2	14451.3	21858.6	41728.6	12286.9	25464.8	65054.1	11004.3	11798.4	6222.03	12589.4	54288.4	122516	12837.7	22	11	19	21	19	17	16	23	15	22	25	16	16	1	15	20	31	12	Q76M96;Q76M96-2	Q76M96;Q76M96-2	Homo sapiens	CCD80_HUMAN	Coiled-coil domain-containing protein 80;Isoform of Q76M96, Isoform 2 of Coiled-coil domain-containing protein 80	CCDC80
1658.79	934.643	1841	2132.75	2594.61	2050.6	1443.76	906.303	1977.8	1755.73	1156.17	2434.6	1285.24	NaN	1531.13	1813.33	966.163	2132.33	4	4	4	5	4	5	4	3	5	4	1	4	3	0	4	1	2	5	Q9H6F5	Q9H6F5	Homo sapiens	CCD86_HUMAN	Coiled-coil domain-containing protein 86	CCDC86
4276.9	2546.56	1527.25	3006.1	3416.9	3255.46	NaN	3544.35	1331.43	3983.81	NaN	2044.31	5335.2	4677.97	4067.19	4059.51	5825.17	986.74	5	2	6	5	5	2	0	5	3	7	0	5	7	1	4	1	2	4	A0A2R8Y4W8;A0A2R8Y4X4;A0A2R8YG73;A0A2U3TZV9;Q3V6T2;Q3V6T2-2;Q3V6T2-3;Q3V6T2-4;Q3V6T2-5	A0A2R8Y4W8;A0A2R8Y4X4;A0A2R8YG73;A0A2U3TZV9;Q3V6T2;Q3V6T2-2;Q3V6T2-3;Q3V6T2-4;Q3V6T2-5	Homo sapiens	A0A2R8Y4W8_HUMAN;A0A2R8Y4X4_HUMAN;A0A2R8YG73_HUMAN;A0A2U3TZV9_HUMAN;GRDN_HUMAN;GRDN_HUMAN;GRDN_HUMAN;GRDN_HUMAN;GRDN_HUMAN	Isoform of Q3V6T2, Coiled-coil domain containing 88A;Isoform of Q3V6T2, Coiled-coil domain containing 88A;Isoform of Q3V6T2, Coiled-coil domain containing 88A;Isoform of Q3V6T2, Coiled-coil domain containing 88A;Girdin;Isoform of Q3V6T2, Isoform 2 of Girdin;Isoform of Q3V6T2, Isoform 3 of Girdin;Isoform of Q3V6T2, Isoform 4 of Girdin;Isoform of Q3V6T2, Isoform 5 of Girdin	CCDC88A
7124.59	6862.42	5175.27	5484.42	8007.53	7193.54	7076.43	7850.32	7112.89	6145.6	5715.26	7675.53	5766.46	9868.88	6784.79	9077.24	3441.6	11030.7	1	1	1	1	1	1	1	1	1	1	1	1	1	1	1	1	1	1	Q9P219	Q9P219	Homo sapiens	DAPLE_HUMAN	Protein Daple	CCDC88C
2390.7	1568.33	2231.09	1599.78	1745.32	2341.48	2170.64	2349.2	1852.14	1289.34	2570.16	1997.24	1414.92	1548.24	1288.33	2167.21	2459.32	1915.88	3	3	3	3	3	3	3	3	3	3	3	3	2	3	3	2	3	3	A0A2R8Y4Z8;Q9Y3X0	A0A2R8Y4Z8;Q9Y3X0	Homo sapiens	A0A2R8Y4Z8_HUMAN;CCDC9_HUMAN	Isoform of Q9Y3X0, Coiled-coil domain containing 9;Coiled-coil domain-containing protein 9	CCDC9
1202.99	1902.01	845.368	2274.62	1275.02	807.567	1392.49	1967.32	1163.87	1228.32	1400.77	1897.41	1418.78	558.856	1895.31	503.5	1613	760.428	3	1	3	2	4	3	3	4	3	4	1	4	4	2	2	1	4	3	Q9GZT6;Q9GZT6-2	Q9GZT6;Q9GZT6-2	Homo sapiens	CC90B_HUMAN	Coiled-coil domain-containing protein 90B, mitochondrial;Isoform of Q9GZT6, Isoform 2 of Coiled-coil domain-containing protein 90B, mitochondrial	CCDC90B
2718.7	9065.96	4885.47	3557.59	3427.7	3387.93	3259.17	2862.56	3965.66	4065.83	2645.58	3674.97	4005.84	NaN	3898.6	NaN	2499.31	1652.53	2	1	4	4	3	2	1	3	4	4	1	2	4	0	4	0	4	2	Q53HC0;Q53HC0-2	Q53HC0;Q53HC0-2	Homo sapiens	CCD92_HUMAN	Coiled-coil domain-containing protein 92;Isoform of Q53HC0, Isoform 2 of Coiled-coil domain-containing protein 92	CCDC92
5653.81	6587.08	6594.4	7231.1	6599.51	8243.37	5724.87	6089.56	5282.71	6079.31	8027.62	5490.84	6762.19	5997.08	4734.59	9722.99	7270.67	5848.11	9	7	9	10	8	8	6	7	6	9	9	8	8	2	10	7	8	8	F8W9X7;Q567U6	F8W9X7;Q567U6	Homo sapiens	F8W9X7_HUMAN;CCD93_HUMAN	Isoform of Q567U6, Coiled-coil domain-containing protein 93;Coiled-coil domain-containing protein 93	CCDC93
NaN	NaN	1050.54	706.026	NaN	NaN	NaN	NaN	NaN	NaN	NaN	NaN	1922.78	NaN	NaN	828.972	3978.79	NaN	0	0	2	1	0	0	0	0	0	0	0	0	2	0	0	1	2	0	Q6ZUT6;Q6ZUT6-4	Q6ZUT6;Q6ZUT6-4	Homo sapiens	CCD9B_HUMAN	Coiled-coil domain-containing protein 9B;Isoform of Q6ZUT6, Isoform 4 of Coiled-coil domain-containing protein 9B	CCDC9B
128917	154303	75298.4	77980.2	133532	114127	132277	150222	133238	96786.2	184252	131205	96176.9	165488	147076	87702.9	165995	142079	7	7	9	9	8	8	7	10	10	10	7	7	7	6	9	6	8	9	O00622	O00622	Homo sapiens	CCN1_HUMAN	CCN family member 1	CCN1
32557.1	42713.6	24457.6	22376.9	30999	34049.7	29892.2	31161	29001.6	19300.5	72672.1	25855.5	10962.2	25266.3	32143.2	40925.5	43538.7	28713.8	4	4	4	4	4	4	4	4	4	3	4	4	3	4	4	4	4	3	P29279	P29279	Homo sapiens	CCN2_HUMAN	CCN family member 2	CCN2
598.682	NaN	531.723	NaN	1032.64	NaN	NaN	479.013	634.96	253.048	NaN	NaN	NaN	NaN	362.231	1.98434	NaN	1227.46	1	0	1	0	1	0	0	1	1	1	0	0	0	0	1	1	0	1	E9PC90;P14635;P14635-2	E9PC90;P14635;P14635-2	Homo sapiens	E9PC90_HUMAN;CCNB1_HUMAN;CCNB1_HUMAN	Isoform of P14635, Cyclin B1 (Fragment);G2/mitotic-specific cyclin-B1;Isoform of P14635, Isoform 2 of G2/mitotic-specific cyclin-B1	CCNB1
8763.76	19789.5	10308.1	10100.1	12923.4	23106.7	28839.7	10347.9	16223.4	10088	23885.7	13932	9491.01	19794	13073.4	29625	13196.7	14831.4	3	3	4	4	3	4	4	3	4	4	4	3	3	3	4	4	3	3	P24385	P24385	Homo sapiens	CCND1_HUMAN	G1/S-specific cyclin-D1	CCND1
3251.9	6211.52	5720.53	3497.15	4852.17	8981.08	12850.7	3975.44	8372.59	6299.81	9368.27	7186.82	2238.33	13788	6432.68	12605.7	5630.8	9591.3	1	1	1	1	1	1	1	1	1	1	1	1	1	1	1	1	1	1	H3BQA6;H3BR23;O95273;O95273-2	H3BQA6;H3BR23;O95273;O95273-2	Homo sapiens	H3BQA6_HUMAN;H3BR23_HUMAN;CCDB1_HUMAN;CCDB1_HUMAN	Isoform of O95273, Cyclin D1 binding protein 1;Isoform of O95273, Cyclin-D1-binding protein 1;Cyclin-D1-binding protein 1;Isoform of O95273, Isoform 2 of Cyclin-D1-binding protein 1	CCNDBP1
11274.4	9142.32	8807.12	10310	10162.3	7356.25	6397.96	8290.93	8592.85	7606.67	6497.5	8126.6	9985.86	7372.31	8724.71	10221.6	3135.69	8354.91	4	2	3	4	4	3	3	2	3	4	3	4	4	2	4	1	2	4	O75909;O75909-4	O75909;O75909-4	Homo sapiens	CCNK_HUMAN	Cyclin-K;Isoform of O75909, Isoform 4 of Cyclin-K	CCNK
5416.17	1747.12	5443.09	3399.33	3063.63	1613.56	937.128	3021.91	2216.54	3000.4	2377.05	1649.46	2253.46	2956.18	1559.12	NaN	2951.89	2832.03	2	2	2	2	2	2	2	1	1	2	2	2	2	1	2	0	2	2	Q8ND76;Q8ND76-3	Q8ND76;Q8ND76-3	Homo sapiens	CCNY_HUMAN	Cyclin-Y;Isoform of Q8ND76, Isoform 3 of Cyclin-Y	CCNY
2728.98	2863.15	3484.64	2490.31	2623.57	1588.28	1831.72	2179.23	2438.88	2129.27	2494.67	2236.34	2826.42	NaN	1942.99	2024.25	2817.67	1651	1	1	1	1	1	1	1	1	1	1	1	1	1	0	1	1	1	1	Q8N7R7;Q8N7R7-3	Q8N7R7;Q8N7R7-3	Homo sapiens	CCYL1_HUMAN	Cyclin-Y-like protein 1;Isoform of Q8N7R7, Isoform 3 of Cyclin-Y-like protein 1	CCNYL1
12491.3	11943.8	11412.4	12778.3	10182.3	10768.5	12085.4	11607.3	9419.06	9903	13242	9361.05	13756.6	9881.37	11111.7	13447	15607.8	10042.3	7	5	8	8	6	6	4	6	4	7	5	6	6	3	7	3	6	6	J3KNF4;O14618	J3KNF4;O14618	Homo sapiens	J3KNF4_HUMAN;CCS_HUMAN	Isoform of O14618, Superoxide dismutase copper chaperone;Copper chaperone for superoxide dismutase	CCS
138789	145824	163209	151113	158356	154977	146925	148781	160785	150951	150032	144890	148914	185913	141409	130657	121879	149372	48	43	54	52	50	50	46	51	51	54	44	50	52	38	51	41	45	49	P78371	P78371	Homo sapiens	TCPB_HUMAN	T-complex protein 1 subunit beta	CCT2
118718	122919	144413	140843	139413	139694	116692	125285	131525	144982	123563	126616	132483	153563	128025	104510	109720	145033	38	38	46	46	37	42	39	41	43	45	35	38	42	28	43	29	35	41	P49368	P49368	Homo sapiens	TCPG_HUMAN	T-complex protein 1 subunit gamma	CCT3
166791	167851	192349	185865	177667	181052	163555	171306	175914	171409	163518	173702	170770	198452	171638	174443	137679	180600	39	40	44	46	43	45	41	45	44	46	35	39	46	32	40	34	42	42	P50991	P50991	Homo sapiens	TCPD_HUMAN	T-complex protein 1 subunit delta	CCT4
58750.2	67748.1	71545.3	73171.1	71660.5	71677.8	64404.5	70027.5	71752.4	73223.9	68553.5	65685.5	66008.5	76267.3	61587.4	67455	57317.5	75179.1	52	50	59	59	50	54	47	56	56	59	43	49	56	38	52	38	48	53	P48643	P48643	Homo sapiens	TCPE_HUMAN	T-complex protein 1 subunit epsilon	CCT5
63076.3	62985.2	75249.8	68745.1	69692.9	68225.5	60459.3	66584.9	68509	71740.1	63377.2	60651	66500.9	75076.9	63416.5	57301.5	55436.4	68023.1	41	39	41	43	41	40	37	42	38	43	37	41	41	36	40	37	39	42	P40227	P40227	Homo sapiens	TCPZ_HUMAN	T-complex protein 1 subunit zeta	CCT6A
63130.5	67527.9	79347.3	73596	66901.2	68292.1	60597.3	65920.8	74718.7	74799.1	61529.9	64543.4	70519.4	76451.7	64665.8	56254.4	59195.8	67727.7	36	37	45	46	36	41	34	43	39	45	33	39	41	27	37	29	39	42	Q99832	Q99832	Homo sapiens	TCPH_HUMAN	T-complex protein 1 subunit eta	CCT7
280798	297108	321811	299942	328860	318619	289484	298888	326737	306477	294006	294869	284381	361918	302530	300538	252835	300932	54	53	58	57	54	58	52	55	55	56	53	53	56	44	55	43	52	55	P50990	P50990	Homo sapiens	TCPQ_HUMAN	T-complex protein 1 subunit theta	CCT8
22010.6	21881.5	18869	18120.8	20557.2	20678	19761.6	16101.6	18997.6	18317.1	18449	16983.8	17994.1	34769.9	18821.2	30947.5	21262.6	16872	4	4	4	4	4	4	2	4	3	4	3	4	3	1	4	1	4	4	P86790;P86791	P86790;P86791	Homo sapiens	CCZ1B_HUMAN;CCZ1_HUMAN	Vacuolar fusion protein CCZ1 homolog B;Vacuolar fusion protein CCZ1 homolog	CCZ1B
31336.3	29137.7	18306.3	35793.7	33856.9	29311.4	32949.2	36975.8	39530.3	26469.3	39189.5	22123.6	30708.6	34498.2	29430.6	45893.8	29667.3	17582.4	26	26	27	30	26	27	24	29	26	27	23	28	27	13	31	22	25	18	Q6YHK3	Q6YHK3	Homo sapiens	CD109_HUMAN	CD109 antigen	CD109
9903.14	6486.49	10202.5	8006.42	7924.07	6730.57	10574.6	8482.1	10070.1	14785.8	7429.74	6250.55	11751.8	4509.12	8656.17	4279.64	13748.5	5094.33	6	5	8	8	5	8	6	7	6	7	4	5	7	2	5	2	5	8	K4DIA7;P48509	K4DIA7;P48509	Homo sapiens	K4DIA7_HUMAN;CD151_HUMAN	Isoform of P48509, Tetraspanin (Fragment);CD151 antigen	CD151
28343.4	26533.2	43366.4	36213	20580.6	18124.9	20070	34528.5	20259.8	33348	18125.7	18280.9	40323.9	21743	33648.1	8381.43	43065.2	13320.1	7	5	11	11	5	6	7	10	10	12	3	9	10	3	10	2	10	5	Q9HCU0	Q9HCU0	Homo sapiens	CD248_HUMAN	Endosialin	CD248
26417.8	21883.3	19701.9	22628.5	19369.4	16049	25760.1	12958.7	16748.3	17194.4	22917.9	14748.8	15663.6	12703.3	15270	22447.9	13863.3	11174.2	9	8	8	9	8	9	9	9	9	9	8	9	7	6	9	7	7	9	A0A0C4DGH0;Q5ZPR3	A0A0C4DGH0;Q5ZPR3	Homo sapiens	A0A0C4DGH0_HUMAN;CD276_HUMAN	Isoform of Q5ZPR3, CD276 molecule;CD276 antigen	CD276
7705.35	7946.62	11111.2	7665.2	8749.76	9812.98	8074.33	10360.1	7717.69	6990.08	7257.6	9985.23	7371.83	8515.29	8438.96	10291.3	10721.1	7595.4	12	13	13	12	13	12	10	13	13	12	10	12	12	9	12	9	12	12	Q9Y5K6	Q9Y5K6	Homo sapiens	CD2AP_HUMAN	CD2-associated protein	CD2AP
14939.2	12042.6	12283.2	12658.4	16677.7	13790.5	12941.1	15482.9	17123	15299.5	15470.5	13875.7	13924.5	19362.6	13772	15030.8	7370.82	15135.1	3	3	3	3	3	3	2	3	3	3	2	3	3	2	3	2	3	3	O95400	O95400	Homo sapiens	CD2B2_HUMAN	CD2 antigen cytoplasmic tail-binding protein 2	CD2BP2
1948.22	6116.12	1465.21	1271	2575.06	NaN	NaN	NaN	2768.15	3315.73	1495.03	1730.37	9365.59	NaN	2817.71	NaN	NaN	1631.95	1	1	1	1	1	0	0	0	1	1	1	1	1	0	1	0	0	1	Q9NPF0;Q9NPF0-2	Q9NPF0;Q9NPF0-2	Homo sapiens	CD320_HUMAN	CD320 antigen;Isoform of Q9NPF0, Isoform 2 of CD320 antigen	CD320
NaN	NaN	10370.4	NaN	NaN	NaN	NaN	NaN	NaN	NaN	NaN	NaN	NaN	NaN	NaN	1203.59	1855.18	NaN	0	0	5	0	0	0	0	0	0	0	0	0	0	0	0	1	1	0	E7EU05;P16671;P16671-3	E7EU05;P16671;P16671-3	Homo sapiens	E7EU05_HUMAN;CD36_HUMAN;CD36_HUMAN	Isoform of P16671, CD36 molecule (Fragment);Platelet glycoprotein 4;Isoform of P16671, Isoform 3 of Platelet glycoprotein 4	CD36
441109	446500	407899	496515	483298	439036	479184	500876	545400	453225	396218	533866	421155	497075	409326	345798	321214	321220	14	13	17	17	15	16	13	15	16	16	13	15	17	12	16	13	14	15	P16070;P16070-3;P16070-4;P16070-5;P16070-7	P16070;P16070-3;P16070-4;P16070-5;P16070-7	Homo sapiens	CD44_HUMAN	CD44 antigen;Isoform of P16070, Isoform 3 of CD44 antigen;Isoform of P16070, Isoform 4 of CD44 antigen;Isoform of P16070, Isoform 5 of CD44 antigen;Isoform of P16070, Isoform 7 of CD44 antigen	CD44
2231.31	4242.41	3990.98	2941.81	4069.74	4130.44	5767.71	3765.3	6140.21	3866.04	4692.34	3992.7	3934.33	4191.2	5037.33	6514.68	4438.88	2973.98	1	1	1	1	1	1	1	1	1	1	1	1	1	1	1	1	1	1	P15529;P15529-10;P15529-11;P15529-12;P15529-13;P15529-14;P15529-15	P15529;P15529-10;P15529-11;P15529-12;P15529-13;P15529-14;P15529-15	Homo sapiens	MCP_HUMAN	Membrane cofactor protein;Isoform of P15529, Isoform 2 of Membrane cofactor protein;Isoform of P15529, Isoform C of Membrane cofactor protein;Isoform of P15529, Isoform E of Membrane cofactor protein;Isoform of P15529, Isoform G of Membrane cofactor protein;Isoform of P15529, Isoform I of Membrane cofactor protein;Isoform of P15529, Isoform K of Membrane cofactor protein	CD46
18679.3	19095.8	17036.1	16619.1	17491.5	14045	28412	15309	18217.4	15826.7	20936.3	25195	22223.4	14598.7	17369.6	26582.2	27635.2	18630.2	6	6	6	6	6	5	6	6	5	6	4	6	6	4	6	5	6	6	A0A2R8Y484;Q08722;Q08722-2;Q08722-3;Q08722-4	A0A2R8Y484;Q08722;Q08722-2;Q08722-3;Q08722-4	Homo sapiens	A0A2R8Y484_HUMAN;CD47_HUMAN;CD47_HUMAN;CD47_HUMAN;CD47_HUMAN	Isoform of Q08722, Leukocyte surface antigen CD47 (Fragment);Leukocyte surface antigen CD47;Isoform of Q08722, Isoform OA3-293 of Leukocyte surface antigen CD47;Isoform of Q08722, Isoform OA3-305 of Leukocyte surface antigen CD47;Isoform of Q08722, Isoform OA3-312 of Leukocyte surface antigen CD47	CD47
8166.91	7033.83	5216.44	4219.23	4751.05	3761.31	6470.13	4260.25	5112.73	3671.67	4755.87	5971.53	5266.95	6749.62	3500.99	3243.71	2136.39	5128.2	1	1	1	1	1	1	1	1	1	1	1	1	1	1	1	1	1	1	B1AMW1;H0YDI1;P19256;P19256-2;P19256-3	B1AMW1;H0YDI1;P19256;P19256-2;P19256-3	Homo sapiens	B1AMW1_HUMAN;H0YDI1_HUMAN;LFA3_HUMAN;LFA3_HUMAN;LFA3_HUMAN	Isoform of P19256, CD58 antigen, (Lymphocyte function-associated antigen 3), isoform CRA_c;Isoform of P19256, CD58 molecule (Fragment);Lymphocyte function-associated antigen 3;Isoform of P19256, Isoform 2 of Lymphocyte function-associated antigen 3;Isoform of P19256, Isoform 3 of Lymphocyte function-associated antigen 3	CD58
112858	113910	174348	121684	103901	42843.3	71001.9	57897.9	89446.5	71389.1	85266.7	77320.9	58853.3	16783.8	35620.6	39741.6	29632.1	19036.2	2	2	4	4	2	4	4	4	4	4	2	3	4	2	4	3	4	4	A0A2U3TZL5;E9PNW4;P13987;P13987-2	A0A2U3TZL5;E9PNW4;P13987;P13987-2	Homo sapiens	A0A2U3TZL5_HUMAN;E9PNW4_HUMAN;CD59_HUMAN;CD59_HUMAN	Isoform of P13987, CD59 molecule (CD59 blood group) (Fragment);readthrough, UPAR/Ly6 domain-containing protein;CD59 glycoprotein;Isoform of P13987, Isoform 2 of CD59 glycoprotein	CD59
205736	165201	254686	270014	166411	248939	311334	97095.5	230097	264484	266754	175397	205079	173721	184892	328258	300422	143226	4	4	4	4	4	4	4	4	4	4	3	4	4	3	4	3	4	4	F8VNT9;F8VV56;F8VWK8;F8W022;P08962;P08962-2;P08962-3	F8VNT9;F8VV56;F8VWK8;F8W022;P08962;P08962-2;P08962-3	Homo sapiens	F8VNT9_HUMAN;F8VV56_HUMAN;F8VWK8_HUMAN;F8W022_HUMAN;CD63_HUMAN;CD63_HUMAN;CD63_HUMAN	Isoform of P08962, CD63 molecule (Fragment);Isoform of P08962, CD63 molecule;Isoform of P08962, Tetraspanin (Fragment);Isoform of P08962, Tetraspanin (Fragment);CD63 antigen;Isoform of P08962, Isoform 2 of CD63 antigen;Isoform of P08962, Isoform 3 of CD63 antigen	CD63
34675.1	46728.9	28406.1	35162.6	31528.9	20790.6	32799.9	38317.1	27085.7	33631.8	31419.7	30030.6	52903	21619	45556.9	21527.2	57226.4	18429.2	4	4	4	5	5	5	5	5	5	5	3	5	4	4	4	5	4	5	A6NMH8;E9PIF1;E9PJK1;E9PRJ8;H0YDJ9;H0YDL9;H0YEE2;P60033	A6NMH8;E9PIF1;E9PJK1;E9PRJ8;H0YDJ9;H0YDL9;H0YEE2;P60033	Homo sapiens	A6NMH8_HUMAN;E9PIF1_HUMAN;E9PJK1_HUMAN;E9PRJ8_HUMAN;H0YDJ9_HUMAN;H0YDL9_HUMAN;H0YEE2_HUMAN;CD81_HUMAN	Isoform of P60033, CD81 molecule;Isoform of P60033, CD81 molecule;Isoform of P60033, CD81 molecule;Isoform of P60033, Tetraspanin (Fragment);Isoform of P60033, Tetraspanin (Fragment);Isoform of P60033, Tetraspanin (Fragment);Isoform of P60033, CD81 molecule;CD81 antigen	CD81
4279.11	NaN	1302.52	4568.18	NaN	2033.18	5222.48	3922.2	1709.23	1349.25	2562	1241.61	5880.42	13674.3	5079.37	1854.68	4650.96	NaN	1	0	1	1	0	1	1	1	1	1	1	1	1	1	1	1	1	0	E9PJC7;P27701;P27701-2	E9PJC7;P27701;P27701-2	Homo sapiens	E9PJC7_HUMAN;CD82_HUMAN;CD82_HUMAN	Isoform of P27701, CD82 molecule (Fragment);CD82 antigen;Isoform of P27701, Isoform 2 of CD82 antigen	CD82
16652.2	8025.49	20760	15365.6	14298.5	275.757	5773.12	5432.82	22034.8	11701.1	5404.52	5851.17	33527.2	8255.61	18967.2	1005.52	9250.93	6560.96	6	5	6	6	5	2	4	5	6	6	4	5	6	4	5	3	5	5	A0A087WU13;A0A2R8Y478;A0A7I2V3T0;A0A7I2V3T7;A6NNI4;F5GXT1;G8JLH6;P21926	A0A087WU13;A0A2R8Y478;A0A7I2V3T0;A0A7I2V3T7;A6NNI4;F5GXT1;G8JLH6;P21926	Homo sapiens	A0A087WU13_HUMAN;A0A2R8Y478_HUMAN;A0A7I2V3T0_HUMAN;A0A7I2V3T7_HUMAN;A6NNI4_HUMAN;F5GXT1_HUMAN;G8JLH6_HUMAN;CD9_HUMAN	Isoform of P21926, Tetraspanin;Isoform of P21926, CD9 molecule;Isoform of P21926, CD9 molecule;Isoform of P21926, Tetraspanin;Isoform of P21926, CD9 molecule;Isoform of P21926, Tetraspanin;Isoform of P21926, Tetraspanin;CD9 antigen	CD9
4048.63	2191.96	1237.85	1767.31	2600.36	1187.08	2814.01	NaN	3023.82	2748.11	1714.96	2947.9	1846.14	NaN	1667.5	NaN	3159.38	1071.53	2	1	2	2	2	2	2	0	2	2	2	1	2	0	2	0	2	2	A0A096LP69	A0A096LP69	Homo sapiens	A0A096LP69_HUMAN	Isoform of P14209, CD99 molecule (Xg blood group)	CD99
9560.31	6372.74	6436.11	6863.79	7387.21	5141.45	6620.67	7233.78	6337.75	6832.69	6289.3	5831.96	8102	2317.42	6326.19	5614.57	9248.49	6775.72	4	4	4	4	4	4	4	4	4	4	3	4	4	1	4	4	4	4	A0A0U1RQT8;Q8TCZ2;Q8TCZ2-2;Q8TCZ2-3;Q8TCZ2-5	A0A0U1RQT8;Q8TCZ2;Q8TCZ2-2;Q8TCZ2-3;Q8TCZ2-5	Homo sapiens	A0A0U1RQT8_HUMAN;C99L2_HUMAN;C99L2_HUMAN;C99L2_HUMAN;C99L2_HUMAN	Isoform of Q8TCZ2, CD99 molecule like 2 (Fragment);CD99 antigen-like protein 2;Isoform of Q8TCZ2, Isoform 2 of CD99 antigen-like protein 2;Isoform of Q8TCZ2, Isoform 3 of CD99 antigen-like protein 2;Isoform of Q8TCZ2, Isoform 5 of CD99 antigen-like protein 2	CD99L2
NaN	NaN	NaN	NaN	NaN	1016.77	198.437	NaN	500.451	1287.97	NaN	NaN	1712.61	NaN	1156.36	NaN	NaN	NaN	0	0	0	0	0	1	1	0	1	1	0	0	1	0	1	0	0	0	H3BPZ6;Q8IWY9;Q8IWY9-1	H3BPZ6;Q8IWY9;Q8IWY9-1	Homo sapiens	H3BPZ6_HUMAN;CDAN1_HUMAN;CDAN1_HUMAN	Isoform of Q8IWY9, Codanin 1 (Fragment);Codanin-1;Isoform of Q8IWY9, Isoform 1 of Codanin-1	CDAN1
5383.6	6189.95	7573.59	7012.48	7481.11	7776.05	6679.9	5639.66	10718.3	6316.6	5805.52	5227.9	5370.1	8013.71	6793.9	5220.64	4773.64	8889.82	5	5	5	5	6	6	5	4	6	5	2	4	5	3	5	2	4	5	O75794;X6RA30	O75794;X6RA30	Homo sapiens	CD123_HUMAN;X6RA30_HUMAN	Cell division cycle protein 123 homolog;Isoform of O75794, Cell division cycle protein 123 homolog	CDC123
5833.06	6363.6	6504.29	6616.78	6021.11	6058.14	4619.55	6634.53	6690.08	5776.06	5879.03	5494.77	5382.63	3917.79	5539.13	4127.54	3914.59	5717.53	6	6	9	9	8	8	8	9	6	9	5	8	8	2	8	2	7	8	Q13042;Q13042-2;Q13042-3	Q13042;Q13042-2;Q13042-3	Homo sapiens	CDC16_HUMAN	Cell division cycle protein 16 homolog;Isoform of Q13042, Isoform 2 of Cell division cycle protein 16 homolog;Isoform of Q13042, Isoform 3 of Cell division cycle protein 16 homolog	CDC16
4756.87	2477.45	2794.06	3194.58	2767.7	2292.97	1650.06	2810.63	2439.82	2321.16	2111.59	2355.04	1843.26	1453.19	3218.97	1418.18	1615.86	2069.89	2	2	2	2	2	2	2	2	2	2	2	2	2	2	2	1	2	2	Q9UJX2	Q9UJX2	Homo sapiens	CDC23_HUMAN	Cell division cycle protein 23 homolog	CDC23
1325.59	1149.96	3346.46	3731.35	1848.69	1548.6	122.058	1445.88	1404.93	3002.52	301.897	1247.12	1000.19	457.588	696.861	1476.35	979.333	1546.18	2	1	2	2	2	1	1	2	2	2	2	2	2	2	2	1	2	2	Q8NHZ8	Q8NHZ8	Homo sapiens	CDC26_HUMAN	Anaphase-promoting complex subunit CDC26	CDC26
4434.31	3459.36	4111.69	4039.51	5420.19	4707.24	2185.38	4329.53	4526.85	3468.88	4151.18	4005.01	3206.55	1510.43	4857.93	2833.26	1932.24	3509.09	3	4	4	4	4	4	3	4	3	4	4	4	3	1	4	2	4	4	G5EA36;P30260;P30260-2	G5EA36;P30260;P30260-2	Homo sapiens	G5EA36_HUMAN;CDC27_HUMAN;CDC27_HUMAN	Isoform of P30260, Cell division cycle 27;Cell division cycle protein 27 homolog;Isoform of P30260, Isoform 2 of Cell division cycle protein 27 homolog	CDC27
6787.53	8975.84	7406	6151.12	6755.54	8297.92	7373.73	6455.35	7893.36	6426.57	8720.35	6317.19	5765.09	9954.79	6339.09	7154.21	3930.26	8727.83	3	3	4	4	2	4	4	3	4	4	3	4	4	3	4	2	3	3	P49427	P49427	Homo sapiens	UB2R1_HUMAN	Ubiquitin-conjugating enzyme E2 R1	CDC34
34881.2	37909.3	40390.4	38732.7	36984.5	41442.9	40759.2	36830.3	39018.6	46417.3	38998.5	37252.2	35623.3	41635.8	39921.6	33993.5	36872.8	42330.5	15	16	18	18	15	17	15	16	16	17	13	18	15	13	18	13	16	16	Q16543	Q16543	Homo sapiens	CDC37_HUMAN	Hsp90 co-chaperone Cdc37	CDC37
5310.61	4545.11	4763	4142.97	4358.92	3949.25	3229.21	2402.13	2987.99	3235.52	3153.12	3566.73	3556.28	NaN	3614.88	3553.93	3018.37	3000.22	2	2	2	2	2	2	2	2	2	2	2	2	2	0	2	2	2	2	B1AL69;Q7L3B6	B1AL69;Q7L3B6	Homo sapiens	B1AL69_HUMAN;CD37L_HUMAN	Isoform of Q7L3B6, Cell division cycle 37 like 1, HSP90 cochaperone;Hsp90 co-chaperone Cdc37-like 1	CDC37L1
53226.9	64035.7	55459.8	62227.4	58490.1	63867.2	52283.6	61841.7	61664.3	63155.5	83601.4	62736.1	61407.4	71523.2	53943.6	86762.8	63485.4	45421.6	12	11	16	16	14	14	14	16	15	16	13	14	16	10	14	9	13	13	P60953	P60953	Homo sapiens	CDC42_HUMAN	Cell division control protein 42 homolog	CDC42
2265.34	3153.6	3955.67	3687.91	3528.68	5393.28	2923.02	3373.33	3781.4	3160.39	3744.36	4216.01	2802.44	NaN	2739.43	NaN	5334.71	3459.4	3	3	5	6	4	4	2	4	3	6	3	4	2	0	5	0	6	2	A0A0A0MRJ0;A0A0A0MRJ1;A0A8I5QJM2;H0Y5V1;H0Y7V8;Q5VT25;Q5VT25-2;Q5VT25-3;Q5VT25-4;Q5VT25-5;Q5VT25-6	A0A0A0MRJ0;A0A0A0MRJ1;A0A8I5QJM2;H0Y5V1;H0Y7V8;Q5VT25;Q5VT25-2;Q5VT25-3;Q5VT25-4;Q5VT25-5;Q5VT25-6	Homo sapiens	A0A0A0MRJ0_HUMAN;A0A0A0MRJ1_HUMAN;A0A8I5QJM2_HUMAN;H0Y5V1_HUMAN;H0Y7V8_HUMAN;MRCKA_HUMAN;MRCKA_HUMAN;MRCKA_HUMAN;MRCKA_HUMAN;MRCKA_HUMAN;MRCKA_HUMAN	Isoform of Q5VT25, non-specific serine/threonine protein kinase;Isoform of Q5VT25, non-specific serine/threonine protein kinase;Isoform of Q5VT25, non-specific serine/threonine protein kinase (Fragment);Isoform of Q5VT25, non-specific serine/threonine protein kinase (Fragment);Isoform of Q5VT25, non-specific serine/threonine protein kinase (Fragment);Serine/threonine-protein kinase MRCK alpha;Iso…	CDC42BPA
7156.49	5698.15	5464.85	5515.01	5020.54	5271.35	5279.01	5522.43	4784.31	5232.57	5190.34	5470.48	5097.25	4046.77	5241.61	5803.05	7567.74	5559.02	30	28	32	32	28	28	28	29	27	32	27	30	31	10	30	16	31	30	H0YLY0;Q9Y5S2	H0YLY0;Q9Y5S2	Homo sapiens	H0YLY0_HUMAN;MRCKB_HUMAN	Isoform of Q9Y5S2, non-specific serine/threonine protein kinase;Serine/threonine-protein kinase MRCK beta	CDC42BPB
5735.53	4793.2	6673.77	6426.99	5548.63	5967	5155.28	7895.15	5766.23	6307.01	5761.04	6261.94	6037	4441.86	8170.86	NaN	4925.16	5381.45	5	7	6	7	6	7	4	6	6	7	3	7	6	1	7	0	6	7	Q00587;Q00587-2	Q00587;Q00587-2	Homo sapiens	BORG5_HUMAN	Cdc42 effector protein 1;Isoform of Q00587, Isoform 2 of Cdc42 effector protein 1	CDC42EP1
4810.17	4635.38	7570.21	4742.09	3997.53	4496.2	6074.34	3547.52	2542.84	3334.37	1639.2	3490.08	4384.33	1202.46	3892.82	3167.69	3579.68	3812.21	2	2	2	2	2	1	1	2	2	2	1	2	2	1	3	1	2	2	O14613	O14613	Homo sapiens	BORG1_HUMAN	Cdc42 effector protein 2	CDC42EP2
15393.3	13474.9	16775.1	15030.1	20522.3	18099.8	15901.3	23596.2	28418.7	18938	16325.4	12306	24954.3	23613.1	21685.7	2041.97	14263.1	16642.1	7	6	7	7	5	5	4	7	5	7	5	7	7	2	7	3	6	7	C9JEZ4;Q9UKI2	C9JEZ4;Q9UKI2	Homo sapiens	C9JEZ4_HUMAN;BORG2_HUMAN	Isoform of Q9UKI2, CDC42 effector protein 3 (Fragment);Cdc42 effector protein 3	CDC42EP3
4248.58	1804.1	4437.77	4810.34	4937.71	3206.9	3403.17	5329.18	3477.54	5088	3564.19	5149.23	5983.99	4444.08	4877.86	NaN	3180.03	5043.62	4	4	5	5	5	4	3	5	4	5	3	4	5	3	4	0	4	4	Q9H3Q1	Q9H3Q1	Homo sapiens	BORG4_HUMAN	Cdc42 effector protein 4	CDC42EP4
12405.6	4399.39	9095.07	10270.9	7524.34	3408.28	4596.85	10857.9	3322.48	8335.97	3126.39	4272.45	7793.72	7165.05	6948.34	NaN	5570.99	5074.19	2	2	2	2	2	2	2	2	2	2	2	2	2	1	2	0	2	2	Q6NZY7	Q6NZY7	Homo sapiens	BORG3_HUMAN	Cdc42 effector protein 5	CDC42EP5
10082.6	8132.55	6872.19	7898.42	11458.9	7843.67	3998.07	8905.83	7923.52	7647.51	6332.99	8537.91	8164.23	8089.63	7934.2	4787.64	3625.12	9594.11	9	8	10	11	10	9	8	10	10	9	9	9	11	6	9	7	6	10	Q99459	Q99459	Homo sapiens	CDC5L_HUMAN	Cell division cycle 5-like protein	CDC5L
5760.66	4543.62	6200.63	5964.09	7550.74	4202.31	3927.76	6310.24	5927.42	6684.96	4588.16	6391.64	6628.33	5072.38	6472.61	3129.66	3187.86	6776.73	7	7	8	9	8	8	4	8	7	9	7	9	8	4	11	3	6	7	Q6P1J9	Q6P1J9	Homo sapiens	CDC73_HUMAN	Parafibromin	CDC73
4251.18	6384.79	3533.9	4153.63	5699.08	NaN	10210.9	4391.95	13549.8	6416.77	6374.54	20864.1	3642.07	17479.9	6677.69	7468.05	1978.61	8474.75	4	3	3	3	4	0	6	4	6	5	5	6	4	3	5	1	2	6	Q9H5V8	Q9H5V8	Homo sapiens	CDCP1_HUMAN	CUB domain-containing protein 1	CDCP1
12077	8100.57	10480.4	10679	11290.1	6003.87	8899.2	9707.93	8041.89	8607.07	8753.21	11907.7	12174.1	7171.77	10263.5	4885.68	9297.33	9438.2	17	17	16	16	17	16	15	15	15	17	16	16	17	11	15	8	17	16	P55287	P55287	Homo sapiens	CAD11_HUMAN	Cadherin-11	CDH11
26419.1	18708.5	32470.6	12769.9	15378.1	17159.4	26195.4	15136.1	16354.5	13489.9	18239.6	11804.3	21553.9	22084.2	13641.3	7131.02	23073.4	17393	11	10	12	11	10	11	10	11	10	12	11	10	12	7	10	5	11	11	P55290;P55290-4	P55290;P55290-4	Homo sapiens	CAD13_HUMAN	Cadherin-13;Isoform of P55290, Isoform 4 of Cadherin-13	CDH13
23388	38615	11059.6	15030.7	24116.6	29945.2	24514.6	20547.5	29215.7	54023.7	21586.4	18993.1	18626.1	32486.5	26646.2	20870.5	31626.8	22428.8	14	15	10	14	13	14	14	13	14	16	9	13	14	10	18	12	15	12	C9J126;P19022;P19022-2	C9J126;P19022;P19022-2	Homo sapiens	C9J126_HUMAN;CADH2_HUMAN;CADH2_HUMAN	Isoform of P19022, Cadherin 2;Cadherin-2;Isoform of P19022, Isoform 2 of Cadherin-2	CDH2
NaN	400.521	3867.63	NaN	37.2461	NaN	NaN	NaN	2720.58	NaN	1229.81	NaN	NaN	484.376	NaN	115.933	NaN	NaN	0	1	6	0	1	0	0	0	3	0	2	0	0	3	0	2	0	0	P55285	P55285	Homo sapiens	CADH6_HUMAN	Cadherin-6	CDH6
36146.9	38825.4	28496.8	32813.4	25228.5	28463.1	43301	22204.8	30856.2	27171.5	27239	24414.1	21481.3	22166.8	22496.2	32330.3	32246.8	23040.6	3	3	3	3	3	2	2	3	2	3	3	3	3	2	3	2	2	3	B3KY94;O14735;O14735-3	B3KY94;O14735;O14735-3	Homo sapiens	B3KY94_HUMAN;CDIPT_HUMAN;CDIPT_HUMAN	Isoform of O14735, CDP-diacylglycerol--inositol 3-phosphatidyltransferase;CDP-diacylglycerol--inositol 3-phosphatidyltransferase;Isoform of O14735, Isoform 3 of CDP-diacylglycerol--inositol 3-phosphatidyltransferase	CDIPT
13260.1	7529.82	15599.4	11507.7	21076.1	9765.89	4116.9	12505.7	18386	15267.3	8907.87	13047.2	12577.7	18998.7	15821.5	2281.61	NaN	17168.1	11	6	12	11	12	10	5	12	12	11	8	11	11	7	11	5	0	11	A0A024QZP7;P06493	A0A024QZP7;P06493	Homo sapiens	A0A024QZP7_HUMAN;CDK1_HUMAN	Isoform of P06493, Cell division cycle 2, G1 to S and G2 to M, isoform CRA_a;Cyclin-dependent kinase 1	CDK1
7455.89	7186	6918.05	6325.03	7795.11	6315.41	5560.17	7040.81	7236.15	7684.16	5247.11	7248.5	7361.92	7271.12	6631.81	5296.71	2235.12	7816.72	9	10	11	12	12	8	10	8	8	14	5	12	11	4	11	4	4	13	A0A0D9SEI3;A0A0D9SEN2;A0A0D9SER5;P21127;P21127-2;P21127-3;P21127-6;P21127-8;P21127-9	A0A0D9SEI3;A0A0D9SEN2;A0A0D9SER5;P21127;P21127-2;P21127-3;P21127-6;P21127-8;P21127-9	Homo sapiens	A0A0D9SEI3_HUMAN;A0A0D9SEN2_HUMAN;A0A0D9SER5_HUMAN;CD11B_HUMAN;CD11B_HUMAN;CD11B_HUMAN;CD11B_HUMAN;CD11B_HUMAN;CD11B_HUMAN	Isoform of P21127, Cyclin dependent kinase 11B;Isoform of P21127, Cyclin dependent kinase 11B;Isoform of P21127, Cyclin dependent kinase 11B;Cyclin-dependent kinase 11B;Isoform of P21127, Isoform SV1 of Cyclin-dependent kinase 11B;Isoform of P21127, Isoform 2 of Cyclin-dependent kinase 11B;Isoform of P21127, Isoform SV5 of Cyclin-dependent kinase 11B;Isoform of P21127, Isoform 8 of Cyclin-depende…	CDK11B
5264.34	4822.45	1662.62	2708.17	2886.28	2399.95	2436.05	2148.64	2713.36	1578.73	1439.81	2714.65	1373.69	NaN	2421.06	NaN	520.051	2061.54	3	1	3	3	2	2	2	2	2	3	1	3	2	0	2	0	2	3	Q9NYV4;Q9NYV4-2	Q9NYV4;Q9NYV4-2	Homo sapiens	CDK12_HUMAN	Cyclin-dependent kinase 12;Isoform of Q9NYV4, Isoform 2 of Cyclin-dependent kinase 12	CDK12
4056.85	898.929	2489.17	2095.3	1969.99	2200.43	1989.93	2087.5	2334.59	4353.33	944.278	NaN	2485.25	7421.48	3301.74	1536.75	806.885	2974.42	2	2	1	2	2	1	1	2	2	1	2	0	2	1	2	1	2	1	Q00536;Q00536-2;Q00536-3	Q00536;Q00536-2;Q00536-3	Homo sapiens	CDK16_HUMAN	Cyclin-dependent kinase 16;Isoform of Q00536, Isoform 2 of Cyclin-dependent kinase 16;Isoform of Q00536, Isoform 3 of Cyclin-dependent kinase 16	CDK16
4419.86	2292.91	2581.33	3366.33	4902.01	3993.98	3359.87	2537.78	3074.73	2721.62	4193.36	4370.87	3768.56	2417.02	3702.08	NaN	2017.24	3583.5	2	1	2	2	2	2	2	2	2	2	1	2	2	1	2	0	2	2	F5H6Z0;Q00537;Q00537-2	F5H6Z0;Q00537;Q00537-2	Homo sapiens	F5H6Z0_HUMAN;CDK17_HUMAN;CDK17_HUMAN	Isoform of Q00537, Cyclin dependent kinase 17;Cyclin-dependent kinase 17;Isoform of Q00537, Isoform 2 of Cyclin-dependent kinase 17	CDK17
2890.16	1049.44	3567.36	2455.93	4824.75	3320.55	2299.8	5749.42	4166.82	4050.47	3245.79	2966.25	2772.97	6691.33	3986.28	3001.27	NaN	4642.8	5	4	7	7	7	7	4	6	7	7	4	7	7	5	7	3	0	7	G3V5T9;P24941;P24941-2	G3V5T9;P24941;P24941-2	Homo sapiens	G3V5T9_HUMAN;CDK2_HUMAN;CDK2_HUMAN	Isoform of P24941, Cyclin dependent kinase 2;Cyclin-dependent kinase 2;Isoform of P24941, Isoform 2 of Cyclin-dependent kinase 2	CDK2
5820.03	230.124	190.798	NaN	1057.35	1227.67	704.445	1811.76	NaN	2143.59	518.404	2905.79	4807.18	5310.3	1289.09	2040.49	1065.54	5689.81	1	1	1	0	1	1	1	1	0	1	1	1	1	1	1	1	1	1	F5GZF0;O14519;O14519-2	F5GZF0;O14519;O14519-2	Homo sapiens	F5GZF0_HUMAN;CDKA1_HUMAN;CDKA1_HUMAN	Isoform of O14519, Cyclin dependent kinase 2 associated protein 1 (Fragment);Cyclin-dependent kinase 2-associated protein 1;Isoform of O14519, Isoform 2 of Cyclin-dependent kinase 2-associated protein 1	CDK2AP1
7003.77	7012.45	6100.67	9079.01	7439.63	9144.78	8197.77	5651.21	6893.91	6452.33	8438.02	6228.69	5241.45	8163.83	6372.32	9811.02	5987.03	7586.46	6	7	7	7	7	7	7	6	7	7	6	6	7	5	7	5	6	7	F8VTV8;F8VWX7;F8VYH9;P11802	F8VTV8;F8VWX7;F8VYH9;P11802	Homo sapiens	F8VTV8_HUMAN;F8VWX7_HUMAN;F8VYH9_HUMAN;CDK4_HUMAN	Isoform of P11802, Cyclin dependent kinase 4;Isoform of P11802, Cyclin dependent kinase 4 (Fragment);Isoform of P11802, Cyclin dependent kinase 4 (Fragment);Cyclin-dependent kinase 4	CDK4
4002.99	2800.3	3331.56	3718.41	3175.44	2913.7	2760.79	1675.77	1791.9	2991.82	2125.11	2534.17	2761.26	3704.38	2735.21	2542.66	1725	2329.49	4	3	4	4	4	4	4	4	3	4	4	3	4	3	3	2	3	4	Q00535;Q00535-2	Q00535;Q00535-2	Homo sapiens	CDK5_HUMAN	Cyclin-dependent kinase 5;Isoform of Q00535, Isoform 2 of Cyclin-dependent kinase 5	CDK5
236.286	NaN	208.83	260.075	NaN	NaN	NaN	522.896	NaN	516.317	NaN	364.678	NaN	NaN	644.363	NaN	NaN	402.639	1	0	1	1	0	0	0	1	0	1	0	1	0	0	1	0	0	1	Q96SZ6;Q96SZ6-2;Q96SZ6-3;Q96SZ6-5;Q96SZ6-6	Q96SZ6;Q96SZ6-2;Q96SZ6-3;Q96SZ6-5;Q96SZ6-6	Homo sapiens	CK5P1_HUMAN	Mitochondrial tRNA methylthiotransferase CDK5RAP1;Isoform of Q96SZ6, Isoform 2 of Mitochondrial tRNA methylthiotransferase CDK5RAP1;Isoform of Q96SZ6, Isoform 3 of Mitochondrial tRNA methylthiotransferase CDK5RAP1;Isoform of Q96SZ6, Isoform 5 of Mitochondrial tRNA methylthiotransferase CDK5RAP1;Isoform of Q96SZ6, Isoform 6 of Mitochondrial tRNA methylthiotransferase CDK5RAP1	CDK5RAP1
9807.04	8403.42	8026.71	8093.89	9399.34	7693.17	9371.32	7734.88	9088.21	7679.1	7364.93	8767.18	8208.38	7224.77	8263.95	8440.67	7838.3	7566.7	18	18	20	19	17	16	15	16	16	19	14	19	19	12	19	12	18	18	Q96JB5	Q96JB5	Homo sapiens	CK5P3_HUMAN	CDK5 regulatory subunit-associated protein 3	CDK5RAP3
4460.91	4599.18	3809.07	4816.61	2984.87	4257.69	5975.83	7708.64	5031.2	4227.03	5791.81	4298.17	4898.31	10606.6	4661.77	NaN	3592.96	5660.55	5	5	4	5	5	5	5	5	5	5	5	5	5	1	5	0	5	5	Q00534	Q00534	Homo sapiens	CDK6_HUMAN	Cyclin-dependent kinase 6	CDK6
512.104	123.951	685.843	416.088	520.842	763.807	190.297	757.249	NaN	406.772	NaN	NaN	NaN	NaN	NaN	NaN	506.672	262.479	1	1	1	1	1	1	1	1	0	1	0	0	0	0	0	0	1	1	D6RAD4;P50613	D6RAD4;P50613	Homo sapiens	D6RAD4_HUMAN;CDK7_HUMAN	Isoform of P50613, Cyclin-dependent kinase 7;Cyclin-dependent kinase 7	CDK7
6593.69	5796.86	5606.36	5925.29	6397.89	5461.32	5278.6	5538.39	5471.12	4384.58	4478.73	5427.85	4842.13	6115.67	5112.62	3774.21	2670.19	6735.87	4	3	4	5	5	4	2	4	5	5	3	4	3	2	5	2	3	5	P50750;P50750-2	P50750;P50750-2	Homo sapiens	CDK9_HUMAN	Cyclin-dependent kinase 9;Isoform of P50750, Isoform 2 of Cyclin-dependent kinase 9	CDK9
6610.98	6288.48	5174.3	4416.46	5241.34	6834.34	7310.46	4924.65	7696.26	2298.47	7892.43	5019.24	3169.52	4797.73	7435.29	11088.1	3531.13	3209.77	3	3	3	3	3	3	3	3	3	3	3	3	3	2	3	3	3	3	P38936	P38936	Homo sapiens	CDN1A_HUMAN	Cyclin-dependent kinase inhibitor 1	CDKN1A
5158.96	13726.3	6585.74	7176.79	2107.51	17793.2	24787.9	1700.2	3433.5	6534.91	8735.94	5229.1	5477.12	11154.9	2638.17	10487.2	11282.6	8466.46	5	5	6	6	3	6	5	3	4	6	5	5	6	4	4	5	6	6	J3QRG6;P42771;P42771-4	J3QRG6;P42771;P42771-4	Homo sapiens	J3QRG6_HUMAN;CDN2A_HUMAN;CDN2A_HUMAN	Isoform of P42771, Cyclin dependent kinase inhibitor 2A;Cyclin-dependent kinase inhibitor 2A;Isoform of P42771, Isoform 5 of Cyclin-dependent kinase inhibitor 2A	CDKN2A
7027.37	4342.25	5791.48	6339.34	6883.14	4245.65	3189.94	6140.1	7016.21	6232.87	6918	6537.39	6589.55	9507.37	5998.66	6543.37	2102.42	6626.7	1	1	1	1	1	1	1	1	1	1	1	1	1	1	1	1	1	1	Q96HQ2;Q96HQ2-2	Q96HQ2;Q96HQ2-2	Homo sapiens	C2AIL_HUMAN	CDKN2AIP N-terminal-like protein;Isoform of Q96HQ2, Isoform 2 of CDKN2AIP N-terminal-like protein	CDKN2AIPNL
12144.1	2473.82	13300	15980.5	4750.43	2417.31	NaN	3582.91	1173.45	5199.14	1804.89	3024.77	6969.56	1704.69	2252.69	1347.83	4226.63	2144.3	2	1	2	2	2	2	0	2	1	2	1	2	2	1	2	1	2	2	P42773	P42773	Homo sapiens	CDN2C_HUMAN	Cyclin-dependent kinase 4 inhibitor C	CDKN2C
3912.73	4733.53	2854.58	3184.32	2848.27	2812.41	4220.23	3134.31	3416.75	4351.46	4126.37	4018.13	2684.19	3892.24	3545.6	2758.57	1973.77	2970.81	8	8	8	8	7	8	5	6	5	8	6	8	7	1	7	4	4	7	Q86X02	Q86X02	Homo sapiens	CDR2L_HUMAN	Cerebellar degeneration-related protein 2-like	CDR2L
7227.93	5774.76	6920.65	7371.44	7833.06	6971.89	7676.38	5796.33	6040.65	7229.06	5611.28	7101.27	7344.79	5525.51	5038.29	6977.05	8250.05	4557.39	3	3	4	4	4	4	4	4	4	4	3	4	4	2	4	3	4	3	O95674	O95674	Homo sapiens	CDS2_HUMAN	Phosphatidate cytidylyltransferase 2	CDS2
21962.1	22679.6	24799.9	25652.8	27033	26835.9	23008.3	26770.1	24808.8	25268.8	25956.6	23516	24581.7	25451.7	23638.3	32477.5	23759.4	28968.8	11	9	11	12	12	10	9	10	10	11	10	12	10	9	12	9	11	10	Q9UKY7	Q9UKY7	Homo sapiens	CDV3_HUMAN	Protein CDV3 homolog	CDV3
2273.73	2945.98	2726.59	2613.82	3201.92	3467.01	1105.21	2544.61	1963.37	2053.71	2474.9	2590.54	2083.22	3749.15	2425.93	2190.07	1094.79	3276.04	7	7	7	8	7	7	3	7	7	7	7	6	7	3	7	3	4	7	Q03701	Q03701	Homo sapiens	CEBPZ_HUMAN	CCAAT/enhancer-binding protein zeta	CEBPZ
7760.93	7475.01	7146.72	7214.52	8139.63	7446.24	7527.4	7791.49	10974.2	7042.13	5065.87	5078.31	8295.24	4842.42	8514.38	5093.89	2671.67	6873.44	5	4	3	4	4	4	3	5	5	4	4	5	5	3	4	2	4	4	G5EA30	G5EA30	Homo sapiens	G5EA30_HUMAN	Isoform of Q92879, CUG triplet repeat, RNA binding protein 1, isoform CRA_c	CELF1
22995.8	12416.1	9505.85	12873.3	7090.69	5693.6	3905.01	20086.3	14168.6	11955.6	12187.4	7891.53	16700.3	1229.67	13874.8	4669.39	19312.8	10388.6	14	8	12	13	10	8	6	12	10	13	9	10	14	1	14	1	11	9	Q8WUJ3	Q8WUJ3	Homo sapiens	CEMIP_HUMAN	Cell migration-inducing and hyaluronan-binding protein	CEMIP
NaN	NaN	858.939	527.543	307.04	286.684	NaN	255.795	866.717	354.107	1.21407	581.638	456.307	NaN	NaN	NaN	NaN	NaN	0	0	1	1	1	1	0	1	1	1	1	1	1	0	0	0	0	0	Q9UHN6;Q9UHN6-2	Q9UHN6;Q9UHN6-2	Homo sapiens	CEIP2_HUMAN	Cell surface hyaluronidase;Isoform of Q9UHN6, Isoform 2 of Cell surface hyaluronidase	CEMIP2
6146.87	5341.61	NaN	NaN	10155.2	NaN	NaN	9605.42	10663.6	NaN	NaN	NaN	NaN	13586.6	4816.72	NaN	6719.59	NaN	1	1	0	0	1	0	0	1	1	0	0	0	0	1	1	0	1	0	A0A8C8KX99;Q92674	A0A8C8KX99;Q92674	Homo sapiens	A0A8C8KX99_HUMAN;CENPI_HUMAN	Isoform of Q92674, Centromere protein I;Centromere protein I	CENPI
3332.01	14947.5	6236.15	5385.15	7792.66	17175	19118.9	10512.8	13264.3	3043.1	11876.8	4711.89	2547.28	21435.1	7159.64	4918.22	13574.9	11535.7	1	1	1	1	1	1	1	1	1	1	1	1	1	1	1	1	1	1	H3BQ71	H3BQ71	Homo sapiens	H3BQ71_HUMAN	Isoform of Q96BT3, Centromere protein T (Fragment)	CENPT
8272.96	9048.79	7319.02	6323.25	6552.32	11713.6	9118.46	10337.3	16482.9	13004.7	15473.2	15382.5	11251.2	15608.4	19577.3	11676.1	14520.8	7982.17	1	1	1	1	1	1	1	1	1	1	1	1	1	1	1	1	1	1	Q66GS9	Q66GS9	Homo sapiens	CP135_HUMAN	Centrosomal protein of 135 kDa	CEP135
18633.4	18697.2	25235.4	16258.7	31324.2	13578.6	22796.7	18682.6	22391.8	26383	19672.5	17118.4	17039.9	14160.7	15536	14748	8425.59	27246.6	33	32	37	33	34	31	35	33	33	37	29	35	35	21	36	21	25	37	Q5SW79	Q5SW79	Homo sapiens	CE170_HUMAN	Centrosomal protein of 170 kDa	CEP170
5428.69	5033.53	4194.18	3122.67	5970.5	3314.95	3526.17	5647.66	2702.3	3761.9	3885.16	2989.78	4381.32	NaN	5575.7	5522.32	4007.73	1730.57	2	2	2	2	2	2	1	1	2	2	2	2	2	0	2	1	2	2	Q9Y4F5;Q9Y4F5-2;Q9Y4F5-3	Q9Y4F5;Q9Y4F5-2;Q9Y4F5-3	Homo sapiens	C170B_HUMAN	Centrosomal protein of 170 kDa protein B;Isoform of Q9Y4F5, Isoform 2 of Centrosomal protein of 170 kDa protein B;Isoform of Q9Y4F5, Isoform 3 of Centrosomal protein of 170 kDa protein B	CEP170B
6937.9	6442.57	5588.42	5768.9	6529.14	6505.8	4353.79	6154.14	3415.41	5589.99	7131.01	6494.92	6627.71	NaN	6550.39	7537.55	4606.65	6488.63	1	1	1	1	1	1	1	1	1	1	1	1	1	0	1	1	1	1	A0A5F9ZHU6;A0A5F9ZHV7;A0A6Q8PG44;A0A6Q8PGA1;A0A6Q8PGB1;A0A6Q8PGC3;A0A6Q8PGP6;A0A6Q8PGQ4;A0A6Q8PH24;A0A6Q8PH78;F8VS29;J3KNF5;O15078	A0A5F9ZHU6;A0A5F9ZHV7;A0A6Q8PG44;A0A6Q8PGA1;A0A6Q8PGB1;A0A6Q8PGC3;A0A6Q8PGP6;A0A6Q8PGQ4;A0A6Q8PH24;A0A6Q8PH78;F8VS29;J3KNF5;O15078	Homo sapiens	A0A5F9ZHU6_HUMAN;A0A5F9ZHV7_HUMAN;A0A6Q8PG44_HUMAN;A0A6Q8PGA1_HUMAN;A0A6Q8PGB1_HUMAN;A0A6Q8PGC3_HUMAN;A0A6Q8PGP6_HUMAN;A0A6Q8PGQ4_HUMAN;A0A6Q8PH24_HUMAN;A0A6Q8PH78_HUMAN;F8VS29_HUMAN;J3KNF5_HUMAN;CE290_HUMAN	Isoform of O15078, Centrosomal protein 290;Isoform of O15078, Centrosomal protein 290;Isoform of O15078, Centrosomal protein 290;Isoform of O15078, Centrosomal protein 290;Isoform of O15078, Centrosomal protein 290;Isoform of O15078, Centrosomal protein 290;Isoform of O15078, Centrosomal protein 290;Isoform of O15078, Centrosomal protein 290;Isoform of O15078, Centrosomal protein 290;Isoform of O…	CEP290
NaN	NaN	1697.48	1384.36	NaN	NaN	NaN	1781.93	NaN	1767.86	NaN	NaN	NaN	NaN	201.863	NaN	NaN	NaN	0	0	1	1	0	0	0	1	0	1	0	0	0	0	1	0	0	0	A0A6Q8PEV5;A0A6Q8PF12;A0A6Q8PFB5;A0A6Q8PGX0;A0A6Q8PH03;A0A7I2SYM4;Q9BYV8	A0A6Q8PEV5;A0A6Q8PF12;A0A6Q8PFB5;A0A6Q8PGX0;A0A6Q8PH03;A0A7I2SYM4;Q9BYV8	Homo sapiens	A0A6Q8PEV5_HUMAN;A0A6Q8PF12_HUMAN;A0A6Q8PFB5_HUMAN;A0A6Q8PGX0_HUMAN;A0A6Q8PH03_HUMAN;A0A7I2SYM4_HUMAN;CEP41_HUMAN	Isoform of Q9BYV8, Centrosomal protein 41;Isoform of Q9BYV8, Centrosomal protein 41;Isoform of Q9BYV8, Centrosomal protein 41;Isoform of Q9BYV8, Centrosomal protein 41;Isoform of Q9BYV8, Centrosomal protein 41;Isoform of Q9BYV8, Centrosomal protein 41;Centrosomal protein of 41 kDa	CEP41
6078.56	4199.28	3638.44	3191.9	5474.05	3249.27	2824.3	3792.27	3624.68	3834.43	2496.53	4744.86	3873.34	6121.09	4697.51	3985.76	2181.39	3262.45	2	2	3	3	1	3	1	3	3	3	2	3	3	1	3	1	2	2	A0A087WV25;O95684;O95684-2	A0A087WV25;O95684;O95684-2	Homo sapiens	A0A087WV25_HUMAN;CEP43_HUMAN;CEP43_HUMAN	Isoform of O95684, Centrosomal protein 43;Centrosomal protein 43;Isoform of O95684, Isoform 2 of Centrosomal protein 43	CEP43
43882.2	36853.9	32252	33961.7	41164.2	48468.5	69258	33419.8	40664.6	24413.5	120842	63775.3	27769.7	456359	39398.8	232397	36455.5	91274.6	1	1	1	1	1	1	1	1	1	1	1	1	1	1	1	1	1	1	D6RBX1;D6RC25;D6RGX6;Q9C0F1;Q9C0F1-2	D6RBX1;D6RC25;D6RGX6;Q9C0F1;Q9C0F1-2	Homo sapiens	D6RBX1_HUMAN;D6RC25_HUMAN;D6RGX6_HUMAN;CEP44_HUMAN;CEP44_HUMAN	Isoform of Q9C0F1, Centrosomal protein of 44 kDa (Fragment);Isoform of Q9C0F1, Centrosomal protein of 44 kDa (Fragment);Isoform of Q9C0F1, Centrosomal protein of 44 kDa (Fragment);Centrosomal protein of 44 kDa;Isoform of Q9C0F1, Isoform 2 of Centrosomal protein of 44 kDa	CEP44
1989.22	1741.48	2103.03	1576.02	2813.06	NaN	NaN	1581.43	2882.48	1866.54	1576.8	1369.46	2115.46	1547.82	2377.52	NaN	NaN	1608.44	4	1	3	4	4	0	0	3	4	4	1	3	4	1	4	0	0	3	Q53EZ4	Q53EZ4	Homo sapiens	CEP55_HUMAN	Centrosomal protein of 55 kDa	CEP55
42065.7	32257.3	32114.7	31634.3	41799	31132.6	46915.2	21321.2	32138.9	29634.2	22697.6	35822.3	24914.8	20785.9	30830.5	31325.4	20909.4	29023	1	1	1	1	1	1	1	1	1	1	1	1	1	1	1	1	1	1	A0A8V8TQ23;A0A8V8TQL1;A0A8V8TRF3;Q9Y6K0	A0A8V8TQ23;A0A8V8TQL1;A0A8V8TRF3;Q9Y6K0	Homo sapiens	A0A8V8TQ23_HUMAN;A0A8V8TQL1_HUMAN;A0A8V8TRF3_HUMAN;CEPT1_HUMAN	Isoform of Q9Y6K0, Choline/ethanolamine phosphotransferase 1;Isoform of Q9Y6K0, Choline/ethanolamine phosphotransferase 1;Isoform of Q9Y6K0, Choline/ethanolamine phosphotransferase 1;Choline/ethanolaminephosphotransferase 1	CEPT1
6421.68	40.9815	4309.43	3462.22	2883.67	3259.63	3166.55	3039.95	447.537	4272.92	1488.61	2941.66	3759.4	365.811	2741.8	NaN	3811.42	1561.53	2	2	2	2	2	2	1	2	1	2	1	1	2	1	1	0	2	1	Q5T4B2	Q5T4B2	Homo sapiens	GT253_HUMAN	Inactive glycosyltransferase 25 family member 3	CERCAM
41341.9	41558.3	39093.7	41745.3	46286.9	48626.9	47485.7	43651.7	56727.1	54215.2	40009.8	60776.9	54347.4	40138.9	58897.6	55776.1	41929	38664.6	3	3	3	3	3	3	3	3	3	3	3	3	3	3	3	3	3	3	H0YKH6;Q5SZE1;Q5SZE2;Q5SZE3;Q5SZE4;Q96G23	H0YKH6;Q5SZE1;Q5SZE2;Q5SZE3;Q5SZE4;Q96G23	Homo sapiens	H0YKH6_HUMAN;Q5SZE1_HUMAN;Q5SZE2_HUMAN;Q5SZE3_HUMAN;Q5SZE4_HUMAN;CERS2_HUMAN	Isoform of Q96G23, Ceramide synthase 2 (Fragment);Isoform of Q96G23, Ceramide synthase 2 (Fragment);Isoform of Q96G23, Ceramide synthase 2 (Fragment);Isoform of Q96G23, Ceramide synthase 2 (Fragment);Isoform of Q96G23, Ceramide synthase 2 (Fragment);Ceramide synthase 2	CERS2
NaN	1272.15	726.991	738.255	NaN	859.74	1803.89	NaN	NaN	2886.62	NaN	2521.53	685.908	2518.68	2249.63	NaN	NaN	1497.68	0	1	1	2	0	1	1	0	0	1	0	2	1	1	2	0	0	1	F8VXY1;H0YI10;Q49AQ3;Q8N5B7;Q8N5B7-2	F8VXY1;H0YI10;Q49AQ3;Q8N5B7;Q8N5B7-2	Homo sapiens	F8VXY1_HUMAN;H0YI10_HUMAN;Q49AQ3_HUMAN;CERS5_HUMAN;CERS5_HUMAN	Isoform of Q8N5B7, Ceramide synthase 5;Isoform of Q8N5B7, Ceramide synthase 5 (Fragment);Isoform of Q8N5B7, Ceramide synthase 5;Ceramide synthase 5;Isoform of Q8N5B7, Isoform 2 of Ceramide synthase 5	CERS5
3020.8	5462.99	3247.35	3913.29	3165.85	3708.54	3573.84	3381.05	3253.51	2823.42	5438.53	3288.22	3172.26	NaN	3443.23	7719.44	3795.54	2840.52	7	5	7	7	6	6	2	5	5	7	2	5	7	0	6	5	5	5	A0A2R8Y5S9;A0A2R8Y7Q9;A0A2R8YEK8;A0A2U3TZL3;Q9Y5P4;Q9Y5P4-2;Q9Y5P4-3	A0A2R8Y5S9;A0A2R8Y7Q9;A0A2R8YEK8;A0A2U3TZL3;Q9Y5P4;Q9Y5P4-2;Q9Y5P4-3	Homo sapiens	A0A2R8Y5S9_HUMAN;A0A2R8Y7Q9_HUMAN;A0A2R8YEK8_HUMAN;A0A2U3TZL3_HUMAN;CERT_HUMAN;CERT_HUMAN;CERT_HUMAN	Isoform of Q9Y5P4, Ceramide transfer protein;Isoform of Q9Y5P4, Ceramide transfer protein;Isoform of Q9Y5P4, Ceramide transfer protein;Isoform of Q9Y5P4, Ceramide transfer protein (Fragment);Ceramide transfer protein;Isoform of Q9Y5P4, Isoform 2 of Ceramide transfer protein;Isoform of Q9Y5P4, Isoform 3 of Ceramide transfer protein	CERT1
2252.37	NaN	91.1268	NaN	NaN	3485.81	NaN	NaN	NaN	NaN	NaN	2303.31	1649.4	NaN	NaN	1249.69	16568.7	NaN	3	0	2	0	0	9	0	0	0	0	0	5	1	0	0	2	11	0	P23141;P23141-2;P23141-3	P23141;P23141-2;P23141-3	Homo sapiens	EST1_HUMAN	Liver carboxylesterase 1;Isoform of P23141, Isoform 2 of Liver carboxylesterase 1;Isoform of P23141, Isoform 3 of Liver carboxylesterase 1	CES1
3125.66	1934.36	2884.64	3949.72	2307.58	4186.62	3183.5	2817.86	3774.66	3030.06	3327.32	2219.42	1740.65	NaN	1900.01	3497.45	5948.21	868.635	4	3	5	5	3	2	2	4	1	4	2	3	3	0	4	2	4	2	O00748;O00748-4	O00748;O00748-4	Homo sapiens	EST2_HUMAN	Cocaine esterase;Isoform of O00748, Isoform 3 of Cocaine esterase	CES2
4088.53	5025.7	3738.68	3779.62	5074.34	5550.92	6295.16	5717.93	6771.62	5399.54	5316.13	5658.39	5644.84	8484.32	7462.71	1205.87	5750.28	8471.42	1	1	1	1	1	1	1	1	1	1	1	1	1	1	1	1	1	1	P41208;Q12798	P41208;Q12798	Homo sapiens	CETN2_HUMAN;CETN1_HUMAN	Centrin-2;Centrin-1	CETN2
3655.22	4129.07	3462.87	3744.92	3578.24	6655.77	6510.66	3261.28	4662.84	3187.16	8399.58	4189.28	3148.3	9191.88	4693.74	6243.8	3015.26	5300.33	3	3	4	4	3	4	4	4	4	4	4	4	4	4	4	2	4	4	Q9Y6A4	Q9Y6A4	Homo sapiens	CFA20_HUMAN	Cilia- and flagella-associated protein 20	CFAP20
1003.29	1523.53	NaN	NaN	1475.89	NaN	652.198	1742.93	2200.33	NaN	298.446	NaN	2858.76	1151.51	1274.04	617.235	1590.81	NaN	1	1	0	0	1	0	1	1	1	0	1	0	1	1	1	1	1	0	A0A0A0MTQ3;Q96N23;Q96N23-2	A0A0A0MTQ3;Q96N23;Q96N23-2	Homo sapiens	A0A0A0MTQ3_HUMAN;CFA54_HUMAN;CFA54_HUMAN	Isoform of Q96N23, Cilia and flagella associated protein 54;Cilia- and flagella-associated protein 54;Isoform of Q96N23, Isoform 2 of Cilia- and flagella-associated protein 54	CFAP54
NaN	NaN	NaN	NaN	NaN	NaN	NaN	NaN	NaN	NaN	1760.03	479.474	NaN	NaN	NaN	NaN	NaN	NaN	0	0	0	0	0	0	0	0	0	0	1	1	0	0	0	0	0	0	A0A8V8TNU0;B4E1Z4;E7ETN3;H7C5H1;P00751	A0A8V8TNU0;B4E1Z4;E7ETN3;H7C5H1;P00751	Homo sapiens	A0A8V8TNU0_HUMAN;B4E1Z4_HUMAN;E7ETN3_HUMAN;H7C5H1_HUMAN;CFAB_HUMAN	Isoform of P00751, Complement C2;readthrough, Complement C2;readthrough, C3/C5 convertase;Isoform of P00751, Complement C2;Complement factor B	CFB
12924.5	6080.68	7278.42	14945.1	10950.2	4685.05	4404.23	8960.57	6144.96	10654.1	7677.91	6661.34	9757.2	8851.33	7295.48	6883.48	2644.86	6345.23	2	1	2	2	2	2	1	2	2	2	1	2	2	1	2	1	1	2	Q9UEE9	Q9UEE9	Homo sapiens	CFDP1_HUMAN	Craniofacial development protein 1	CFDP1
842217	897447	1020720	1040550	737492	1031700	780630	1138680	899876	1035790	977367	889381	1055610	941195	912267	1065850	1315900	828814	23	22	30	30	22	27	24	30	28	30	21	24	29	18	24	21	28	26	P23528	P23528	Homo sapiens	COF1_HUMAN	Cofilin-1	CFL1
5832.09	7750.78	6762.94	8307.09	6863.56	9966.09	9133.73	8094.1	6658.81	6729.96	9356.23	7440.92	5617.33	12576.3	7443.3	13262.3	11801.8	6235.34	10	11	14	14	11	12	11	13	12	14	10	13	13	9	11	11	12	12	Q9Y281;Q9Y281-3	Q9Y281;Q9Y281-3	Homo sapiens	COF2_HUMAN	Cofilin-2;Isoform of Q9Y281, Isoform 3 of Cofilin-2	CFL2
3547.36	1600.13	2950.7	3685.97	3963.7	2001.31	916.61	3819.89	3259.69	3216.36	1993.13	2331.62	2927.02	3585.33	3182.69	889.268	1263.79	2762.34	4	4	4	4	3	4	2	4	4	4	4	4	4	2	4	1	3	4	Q9UFW8	Q9UFW8	Homo sapiens	CGBP1_HUMAN	CGG triplet repeat-binding protein 1	CGGBP1
1634.09	835.722	887.669	1470.17	1030.48	1037.08	205.104	1646.34	350.9	654.942	309.493	2047.59	1096.22	NaN	1344.66	NaN	NaN	1419.47	1	1	1	1	1	1	1	1	1	1	1	1	1	0	1	0	0	1	Q96JM3	Q96JM3	Homo sapiens	CHAP1_HUMAN	Chromosome alignment-maintaining phosphoprotein 1	CHAMP1
4215.95	8558.58	3664.84	3542.87	9799.91	14002.8	21291.3	12549.9	15452.6	3421.22	15296.5	14408	4352.23	19049.4	11722.9	27808.1	7897.19	14402.5	4	5	5	5	6	8	8	7	7	4	8	8	5	6	7	7	7	8	C9JRZ6;F8WAR4;Q9NX63	C9JRZ6;F8WAR4;Q9NX63	Homo sapiens	C9JRZ6_HUMAN;F8WAR4_HUMAN;MIC19_HUMAN	Isoform of Q9NX63, Coiled-coil-helix-coiled-coil-helix domain containing 3;Isoform of Q9NX63, Coiled-coil-helix-coiled-coil-helix domain containing 3;MICOS complex subunit MIC19	CHCHD3
9393.33	5151.17	8151.88	7903.98	8224.8	4505.82	4686.05	8500.59	2620.68	5867.83	7393.69	4464.59	5387.44	3477.36	5182.9	6416.76	6589.74	6134.35	2	2	3	2	2	1	2	2	2	3	1	3	3	1	3	2	3	3	Q8N4Q1;Q8N4Q1-2	Q8N4Q1;Q8N4Q1-2	Homo sapiens	MIA40_HUMAN	Mitochondrial intermembrane space import and assembly protein 40;Isoform of Q8N4Q1, Isoform 2 of Mitochondrial intermembrane space import and assembly protein 40	CHCHD4
5709.68	4357.75	5431.83	6502.53	7098.96	5491.86	2387.95	7220.23	4002.67	3622.68	3866.77	7842.73	6886.11	4670.27	6255.76	2233.78	1575.88	4471.27	5	7	6	6	7	6	4	6	5	6	5	6	6	4	7	3	2	5	A0A0A0MRH8;A0A0A0MSH9;Q86WJ1;Q86WJ1-2;Q86WJ1-4	A0A0A0MRH8;A0A0A0MSH9;Q86WJ1;Q86WJ1-2;Q86WJ1-4	Homo sapiens	A0A0A0MRH8_HUMAN;A0A0A0MSH9_HUMAN;CHD1L_HUMAN;CHD1L_HUMAN;CHD1L_HUMAN	Isoform of Q86WJ1, Chromodomain helicase DNA binding protein 1 like;Isoform of Q86WJ1, Chromodomain helicase DNA binding protein 1 like;Chromodomain-helicase-DNA-binding protein 1-like;Isoform of Q86WJ1, Isoform 2 of Chromodomain-helicase-DNA-binding protein 1-like;Isoform of Q86WJ1, Isoform 4 of Chromodomain-helicase-DNA-binding protein 1-like	CHD1L
686.201	1156.79	1788.58	1571.16	1177.18	2355.52	1558.86	1981.88	1306.29	NaN	1016.16	853.498	358.946	NaN	NaN	451.042	NaN	931.916	1	1	1	1	1	1	1	1	1	0	1	1	1	0	0	1	0	1	A0A0D9SEP7;A0A0D9SEU0;A0A1B0GTU9;A0A8V8TRB2;O14647;O14647-2	A0A0D9SEP7;A0A0D9SEU0;A0A1B0GTU9;A0A8V8TRB2;O14647;O14647-2	Homo sapiens	A0A0D9SEP7_HUMAN;A0A0D9SEU0_HUMAN;A0A1B0GTU9_HUMAN;A0A8V8TRB2_HUMAN;CHD2_HUMAN;CHD2_HUMAN	Isoform of O14647, DNA helicase (Fragment);Isoform of O14647, DNA helicase (Fragment);Isoform of O14647, DNA helicase (Fragment);Isoform of O14647, DNA helicase (Fragment);Chromodomain-helicase-DNA-binding protein 2;Isoform of O14647, Isoform 2 of Chromodomain-helicase-DNA-binding protein 2	CHD2
12081.7	8351.06	9078.33	9778.19	14453.2	9151.03	6618.37	14334.4	12717.6	9168.23	8322.49	8779.26	10586.5	11427	9659.77	6094.79	3703.34	10712.6	22	16	23	22	20	21	9	21	20	22	15	18	21	12	20	6	6	20	A0A0C4DGG9;A0A2R8Y212;A0A2R8Y425;A0A2R8Y521;A0A2R8Y5J0;A0A2R8YD40;A0A2R8YDJ9;A0A2R8YFD8;A0A2R8YFK9;A0A2U3TZM0;F5GWX5;Q14839;Q14839-2	A0A0C4DGG9;A0A2R8Y212;A0A2R8Y425;A0A2R8Y521;A0A2R8Y5J0;A0A2R8YD40;A0A2R8YDJ9;A0A2R8YFD8;A0A2R8YFK9;A0A2U3TZM0;F5GWX5;Q14839;Q14839-2	Homo sapiens	A0A0C4DGG9_HUMAN;A0A2R8Y212_HUMAN;A0A2R8Y425_HUMAN;A0A2R8Y521_HUMAN;A0A2R8Y5J0_HUMAN;A0A2R8YD40_HUMAN;A0A2R8YDJ9_HUMAN;A0A2R8YFD8_HUMAN;A0A2R8YFK9_HUMAN;A0A2U3TZM0_HUMAN;F5GWX5_HUMAN;CHD4_HUMAN;CHD4_HUMAN	Isoform of Q14839, DNA helicase;Isoform of Q14839, DNA helicase;Isoform of Q14839, DNA helicase (Fragment);Isoform of Q14839, DNA helicase;Isoform of Q14839, DNA helicase;Isoform of Q14839, DNA helicase (Fragment);Isoform of Q14839, DNA helicase (Fragment);Isoform of Q14839, DNA helicase;Isoform of Q14839, DNA helicase;Isoform of Q14839, DNA helicase;Isoform of Q14839, DNA helicase;Chromodomain-h…	CHD4
NaN	NaN	NaN	NaN	988.79	NaN	NaN	NaN	1385.43	1329.75	NaN	1447.67	841.994	1195.96	1791.46	NaN	NaN	NaN	0	0	0	0	1	0	0	0	1	1	0	1	1	1	1	0	0	0	E7EPP6;E9PJI4;E9PKQ3;E9PPA5;O14757;O14757-2;O14757-3	E7EPP6;E9PJI4;E9PKQ3;E9PPA5;O14757;O14757-2;O14757-3	Homo sapiens	E7EPP6_HUMAN;E9PJI4_HUMAN;E9PKQ3_HUMAN;E9PPA5_HUMAN;CHK1_HUMAN;CHK1_HUMAN;CHK1_HUMAN	Isoform of O14757, Checkpoint kinase 1;Isoform of O14757, Checkpoint kinase 1 (Fragment);Isoform of O14757, Serine/threonine-protein kinase Chk1 (Fragment);Isoform of O14757, Checkpoint kinase 1 (Fragment);Serine/threonine-protein kinase Chk1;Isoform of O14757, Isoform 2 of Serine/threonine-protein kinase Chk1;Isoform of O14757, Isoform 3 of Serine/threonine-protein kinase Chk1	CHEK1
7877.47	5977.33	6937.18	7956.31	8353.29	7596.71	76973.9	6451.06	10261.3	7619.08	5511.06	9696.92	7783.93	8969.05	8354.3	NaN	2726.33	8265.34	4	4	4	5	4	4	1	4	3	4	4	4	4	1	5	0	2	4	J3QK89;Q8IWX8	J3QK89;Q8IWX8	Homo sapiens	J3QK89_HUMAN;CHERP_HUMAN	Isoform of Q8IWX8, Calcium homeostasis endoplasmic reticulum protein;Calcium homeostasis endoplasmic reticulum protein	CHERP
8422.21	5836.95	5770.22	6585.42	6674.74	4532.79	8942.97	5498.94	6325.99	5278.51	6919.16	7213.19	4561.98	18765.1	4800.92	6604.3	9845.11	4154.86	5	6	7	6	6	6	6	5	6	6	5	5	6	3	8	4	5	5	Q9BWS9;Q9BWS9-2	Q9BWS9;Q9BWS9-2	Homo sapiens	CHID1_HUMAN	Chitinase domain-containing protein 1;Isoform of Q9BWS9, Isoform 2 of Chitinase domain-containing protein 1	CHID1
12369.8	16842.1	12038.3	14902	12387.9	13375.1	8696.68	14844.9	14223.3	13405.4	11479.7	9698.2	13127.5	15356.3	12240.3	13560.3	15482.5	7719.95	6	6	6	6	6	6	6	6	5	6	5	6	6	3	6	6	6	6	A0A6Q8PG85;Q9HD42	A0A6Q8PG85;Q9HD42	Homo sapiens	A0A6Q8PG85_HUMAN;CHM1A_HUMAN	Isoform of Q9HD42, Charged multivesicular body protein 1A;Charged multivesicular body protein 1a	CHMP1A
5050.61	15243	6567.5	4887.26	5958.75	7852.73	6963.26	5201.83	7131.02	5817.96	5822.06	3230.92	2624.1	4341.36	4488.38	4067.38	3017.02	5464.49	1	3	2	2	3	3	2	2	2	3	2	3	2	2	3	1	2	2	Q7LBR1	Q7LBR1	Homo sapiens	CHM1B_HUMAN	Charged multivesicular body protein 1b	CHMP1B
4006.94	2806.43	3356.43	4849.87	4145.51	4421.66	4023.41	4450.74	3363.57	3722.96	4627.16	3058.41	4423.81	5364.86	2767.05	2854.37	3082.15	4136.3	6	5	7	7	7	6	6	5	6	7	5	6	7	2	7	2	7	6	M0R1T5;O43633	M0R1T5;O43633	Homo sapiens	M0R1T5_HUMAN;CHM2A_HUMAN	Isoform of O43633, Charged multivesicular body protein 2A;Charged multivesicular body protein 2a	CHMP2A
6308.98	10072	10619.8	10642.8	6874.75	13446.3	11485.2	6152.22	9896.09	7673.41	12792.4	7176.05	5858.92	4911.37	5098	9983.93	6939.72	7916.34	4	4	4	4	4	4	4	4	4	4	4	3	4	3	4	4	4	4	A0A087WW88;C9J0A7;Q9UQN3;Q9UQN3-2	A0A087WW88;C9J0A7;Q9UQN3;Q9UQN3-2	Homo sapiens	A0A087WW88_HUMAN;C9J0A7_HUMAN;CHM2B_HUMAN;CHM2B_HUMAN	Isoform of Q9UQN3, Charged multivesicular body protein 2B;Isoform of Q9UQN3, Charged multivesicular body protein 2B;Charged multivesicular body protein 2b;Isoform of Q9UQN3, Isoform 2 of Charged multivesicular body protein 2b	CHMP2B
9718.16	9129.01	10334.4	9939.51	9644.8	9716.82	13124.4	11327.8	10603.6	9315.62	8075.39	6833.87	8115.77	9220.33	7999.03	9061.98	9568.31	9504.82	4	4	5	5	4	4	4	4	4	5	4	5	4	3	5	4	4	4	Q9Y3E7	Q9Y3E7	Homo sapiens	CHMP3_HUMAN	Charged multivesicular body protein 3	CHMP3
5654.84	4336.86	5733.03	5643.95	5405.42	4655.79	5390.13	5703.12	5345.57	5880.9	4833.58	4889.4	5464.43	2912.77	4884.6	1799.22	3606.86	4995.76	3	3	3	3	3	3	3	3	3	3	3	3	3	2	3	1	3	3	Q9BY43;Q9BY43-2	Q9BY43;Q9BY43-2	Homo sapiens	CHM4A_HUMAN	Charged multivesicular body protein 4a;Isoform of Q9BY43, Isoform 2 of Charged multivesicular body protein 4a	CHMP4A
24511.7	32558.1	30210.5	28612.2	28651.2	31596.5	30888.6	27613.9	29422.6	27340	35618.9	27857.9	26525.2	27502.6	27432.4	37711.8	25075	32226.5	8	8	8	8	8	7	8	8	8	8	7	8	8	5	8	8	8	8	Q9H444	Q9H444	Homo sapiens	CHM4B_HUMAN	Charged multivesicular body protein 4b	CHMP4B
14914.2	12234.5	15465.2	15031.5	13334.9	12281.6	10219.2	11709.2	11461	14007.1	10546.9	10572.2	14209.9	11256.4	11438.6	11463	13295.8	12262.5	6	6	7	7	6	7	5	7	6	7	4	6	7	4	5	5	7	7	Q9NZZ3;Q9NZZ3-2	Q9NZZ3;Q9NZZ3-2	Homo sapiens	CHMP5_HUMAN	Charged multivesicular body protein 5;Isoform of Q9NZZ3, Isoform 2 of Charged multivesicular body protein 5	CHMP5
7186.06	6559.73	5572.63	6664.58	6061.95	6477.65	8505.82	8347.77	11631	9018.4	7924.26	8148.36	7741.29	5056.65	4969.55	6042.55	6457.77	5537.71	5	4	5	5	5	5	5	5	5	5	4	4	5	3	5	5	5	5	I3L3E4;Q96FZ7	I3L3E4;Q96FZ7	Homo sapiens	I3L3E4_HUMAN;CHMP6_HUMAN	Isoform of Q96FZ7, Charged multivesicular body protein 6 (Fragment);Charged multivesicular body protein 6	CHMP6
4771.29	5604.5	5540.21	6891.65	7724.57	7789.96	7642.63	6297.23	6021.05	6016.18	7508.94	8608.18	6134.59	4847.77	5956.37	3841.06	3963.57	7720.14	6	4	7	7	6	7	4	4	7	8	3	7	5	3	6	3	4	6	Q8WUX9	Q8WUX9	Homo sapiens	CHMP7_HUMAN	Charged multivesicular body protein 7	CHMP7
3927.29	4839.57	NaN	NaN	6545.69	NaN	NaN	5914.46	5103.47	NaN	1.22266	NaN	4368.39	NaN	4907.17	967.445	4801.17	NaN	1	1	0	0	1	0	0	1	1	0	1	0	1	0	1	1	1	0	A0A494C047;A0A494C0C9;A0A494C1M7;A0A494C1R0;B8ZZ96;C9J3V9;C9JR98;P15882;P15882-2;P15882-3	A0A494C047;A0A494C0C9;A0A494C1M7;A0A494C1R0;B8ZZ96;C9J3V9;C9JR98;P15882;P15882-2;P15882-3	Homo sapiens	A0A494C047_HUMAN;A0A494C0C9_HUMAN;A0A494C1M7_HUMAN;A0A494C1R0_HUMAN;B8ZZ96_HUMAN;C9J3V9_HUMAN;C9JR98_HUMAN;CHIN_HUMAN;CHIN_HUMAN;CHIN_HUMAN	Isoform of P15882, Chimerin 1 (Fragment);Isoform of P15882, Chimerin 1;Isoform of P15882, Chimerin 1;Isoform of P15882, Chimerin 1;Isoform of P15882, Chimerin 1;Isoform of P15882, Chimerin 1;Isoform of P15882, Chimerin 1;N-chimaerin;Isoform of P15882, Isoform Alpha-1 of N-chimaerin;Isoform of P15882, Isoform 3 of N-chimaerin	CHN1
3273.01	2877.38	3631.76	3880.02	3484.55	3550.78	2746.03	3475.44	2759.08	3886.55	3235.52	2859.34	3305.76	3291.52	2846.45	1061.87	3644.77	3715.51	4	5	7	7	5	5	3	5	6	5	4	5	5	3	6	2	6	5	Q9UHD1;Q9UHD1-2	Q9UHD1;Q9UHD1-2	Homo sapiens	CHRD1_HUMAN	Cysteine and histidine-rich domain-containing protein 1;Isoform of Q9UHD1, Isoform 2 of Cysteine and histidine-rich domain-containing protein 1	CHORDC1
11908.3	14901.5	11488.5	11699.4	13931	11271.5	12699.6	8704.16	10736	9633.47	11331	14856.8	7931.03	12436.6	10605	9963.78	9455.34	13647.4	13	12	11	12	13	11	12	11	12	12	10	12	12	9	13	9	11	12	Q99653	Q99653	Homo sapiens	CHP1_HUMAN	Calcineurin B homologous protein 1	CHP1
9606.79	8612.28	8615.98	9412.89	7289.31	6886.64	7048.5	10762.1	7229.89	11294.5	8230.58	5929.09	9317.87	9035.84	9915.52	NaN	13646.7	7776.82	2	1	1	3	3	3	1	2	2	3	2	2	3	1	2	0	3	2	A0A8I5QJC8;Q8IZ52;Q8IZ52-4	A0A8I5QJC8;Q8IZ52;Q8IZ52-4	Homo sapiens	A0A8I5QJC8_HUMAN;CHSS2_HUMAN;CHSS2_HUMAN	Isoform of Q8IZ52, Hexosyltransferase;Chondroitin sulfate synthase 2;Isoform of Q8IZ52, Isoform 3 of Chondroitin sulfate synthase 2	CHPF
3602.2	2996.66	2523.73	2720.39	2206.81	1859.81	2693.82	2468.69	2330.02	2675.7	1326.07	3145.39	2209.42	1933.69	2607.07	1025.58	4117.04	1982.6	2	2	3	2	2	2	2	2	2	2	2	2	2	2	3	1	1	2	A0A8I5KRN5;C9JZF7;G5E9W2;Q9P2E5	A0A8I5KRN5;C9JZF7;G5E9W2;Q9P2E5	Homo sapiens	A0A8I5KRN5_HUMAN;C9JZF7_HUMAN;G5E9W2_HUMAN;CHPF2_HUMAN	Isoform of Q9P2E5, Hexosyltransferase;Isoform of Q9P2E5, Hexosyltransferase;Isoform of Q9P2E5, Hexosyltransferase;Chondroitin sulfate glucuronyltransferase	CHPF2
14121	11396.2	10421.6	11282.7	12277.9	13337.7	16959.5	11364	13280.6	13941.3	14380.1	13023.6	9511.01	NaN	13673.8	15556.4	11719.5	12039.2	1	1	1	1	1	1	1	1	1	1	1	1	1	0	1	1	1	1	F8W1B3;Q8WUD6;Q8WUD6-2	F8W1B3;Q8WUD6;Q8WUD6-2	Homo sapiens	F8W1B3_HUMAN;CHPT1_HUMAN;CHPT1_HUMAN	Isoform of Q8WUD6, Choline phosphotransferase 1;Cholinephosphotransferase 1;Isoform of Q8WUD6, Isoform 2 of Cholinephosphotransferase 1	CHPT1
4154.48	5788.4	4537.51	4752.21	6177.46	5208.19	5371.76	NaN	4837.5	7145.33	5278.91	7340.66	8485.71	8404.03	5547.23	NaN	2622.08	10425	1	1	1	1	1	1	1	0	1	1	1	1	1	1	1	0	1	1	E5RGS9;Q9NRG0	E5RGS9;Q9NRG0	Homo sapiens	E5RGS9_HUMAN;CHRC1_HUMAN	Isoform of Q9NRG0, Chromatin accessibility complex subunit 1;Chromatin accessibility complex protein 1	CHRAC1
3795.85	3189.37	3288.96	3587.29	4124.1	2256.13	3729.48	4557.76	3510.69	4784.59	3067.2	4584.62	3678.18	2651.98	4808.32	802.352	2146.79	2295.74	4	4	4	4	4	4	4	4	4	4	4	4	4	3	4	2	4	4	Q8NCH0	Q8NCH0	Homo sapiens	CHSTE_HUMAN	Carbohydrate sulfotransferase 14	CHST14
NaN	NaN	NaN	NaN	NaN	NaN	NaN	NaN	NaN	NaN	NaN	578.57	NaN	NaN	NaN	NaN	NaN	NaN	0	0	0	0	0	0	0	0	0	0	0	1	0	0	0	0	0	0	Q9NS84	Q9NS84	Homo sapiens	CHST7_HUMAN	Carbohydrate sulfotransferase 7	CHST7
3335.98	2907.51	849.968	6482.02	2975.89	2984.93	1334.5	3031.45	2018.67	2132.46	2891.86	4142.36	3341.23	2618.89	3055.03	NaN	NaN	4105.99	3	2	2	3	2	2	2	2	2	3	2	2	3	2	2	0	0	2	Q9Y3Y2;Q9Y3Y2-3;Q9Y3Y2-4;X6R700	Q9Y3Y2;Q9Y3Y2-3;Q9Y3Y2-4;X6R700	Homo sapiens	CHTOP_HUMAN;CHTOP_HUMAN;CHTOP_HUMAN;X6R700_HUMAN	Chromatin target of PRMT1 protein;Isoform of Q9Y3Y2, Isoform 2 of Chromatin target of PRMT1 protein;Isoform of Q9Y3Y2, Isoform 3 of Chromatin target of PRMT1 protein;Isoform of Q9Y3Y2, Chromatin target of PRMT1	CHTOP
1956.34	2294.8	2231.64	1913.26	2166.33	2251.1	2424.38	2157.88	2135.94	1864.11	2015.62	1673.29	1724.72	2407.96	2130.54	2014.09	1534.5	1968.67	5	4	5	5	6	6	5	5	6	6	4	4	5	2	5	3	4	5	O15111	O15111	Homo sapiens	IKKA_HUMAN	Inhibitor of nuclear factor kappa-B kinase subunit alpha	CHUK
6569.9	8554.11	10760.3	9743.77	11817.3	14050.2	8462.63	8079.73	11283.7	4781.21	9405.54	6307.92	8242.38	13034.4	6585.92	4918.45	4722.66	10464.2	1	1	1	1	1	1	1	1	1	1	1	1	1	1	1	1	1	1	H0YIM9;Q8WUH1;Q8WUH1-1;Q8WUH1-2	H0YIM9;Q8WUH1;Q8WUH1-1;Q8WUH1-2	Homo sapiens	H0YIM9_HUMAN;CHUR_HUMAN;CHUR_HUMAN;CHUR_HUMAN	CHURC1-FNTB readthrough, Protein Churchill (Fragment);Protein Churchill;Isoform of Q8WUH1, Isoform 1 of Protein Churchill;Isoform of Q8WUH1, Isoform 2 of Protein Churchill	CHURC1-FNTB
14709.6	16344.8	15047.8	16628.7	15341.2	16584.4	16384.3	17030.8	14037.7	16200.6	13335.8	15531.7	16123.6	20075.3	16842.6	13523.9	13474.6	17647.4	3	3	4	4	3	3	3	3	3	3	3	3	3	3	5	3	3	3	O76071	O76071	Homo sapiens	CIAO1_HUMAN	Probable cytosolic iron-sulfur protein assembly protein CIAO1	CIAO1
2791.23	4147.88	4918.86	4260.43	5030.59	4687.74	3344.72	4305.47	3964.14	4389.62	2477.58	3919.67	5623.41	4561.91	3390.05	2622.54	1131.95	2932.1	1	1	1	1	1	1	1	1	1	1	1	1	1	1	1	1	1	1	H0YKV4;Q9H5X1;Q9H5X1-2	H0YKV4;Q9H5X1;Q9H5X1-2	Homo sapiens	H0YKV4_HUMAN;CIA2A_HUMAN;CIA2A_HUMAN	Isoform of Q9H5X1, Cytosolic iron-sulfur assembly component 2A;Cytosolic iron-sulfur assembly component 2A;Isoform of Q9H5X1, Isoform 2 of Cytosolic iron-sulfur assembly component 2A	CIAO2A
19368.4	16970.8	17606.2	19343	20662.4	22894.4	16811.2	21825.8	20005.8	25143.9	17224.7	27165.8	22070.1	25395.4	24970	31931.4	21554	22039.6	3	3	3	3	3	3	3	3	3	3	3	3	3	3	3	3	3	3	H3BNV7;Q9Y3D0	H3BNV7;Q9Y3D0	Homo sapiens	H3BNV7_HUMAN;CIA2B_HUMAN	Isoform of Q9Y3D0, Cytosolic iron-sulfur assembly component 2B (Fragment);Cytosolic iron-sulfur assembly component 2B	CIAO2B
11068	12836.8	16665.8	14583.2	12586.6	15741.2	12840.6	11474.4	13453.9	14178.7	12260.1	14543.4	11718.9	14452.7	13758.3	16506.4	9145.09	12558.6	8	8	9	8	9	8	7	8	7	9	6	9	8	8	9	7	8	8	H3BV90;Q6FI81	H3BV90;Q6FI81	Homo sapiens	H3BV90_HUMAN;CPIN1_HUMAN	Isoform of Q6FI81, Cytokine induced apoptosis inhibitor 1;Anamorsin	CIAPIN1
2557.41	985.939	748.77	1295.19	4346.28	2640.63	24129.2	NaN	NaN	1217.05	NaN	5568.96	1597.73	NaN	1928.48	35221.8	1665.02	3580.65	2	1	2	2	2	1	1	0	0	2	0	2	2	0	2	1	1	2	A0A7P0T9K5;I3L2J0	A0A7P0T9K5;I3L2J0	Homo sapiens	A0A7P0T9K5_HUMAN;I3L2J0_HUMAN	Isoform of Q96RK0, Capicua transcriptional repressor;Isoform of Q96RK0, Capicua transcriptional repressor	CIC
2851.88	1853.55	3283.76	2580.42	3765.63	3962.05	1409.97	3392.79	4173.61	3568.84	3029.71	3299.89	3787.62	4382.73	3641.24	1194.8	4261.31	4150.74	7	5	8	8	8	9	6	7	6	11	3	7	8	5	8	1	2	6	Q8TCG1	Q8TCG1	Homo sapiens	CIP2A_HUMAN	Protein CIP2A	CIP2A
9007.2	8408.83	8490.06	8839.14	8939.09	7151.46	6294.47	8463.9	8653.1	8394.88	6740.83	8375.12	11182.7	8970.97	9354.6	4118.46	10064.1	9633.67	5	5	6	6	5	5	5	5	5	6	6	5	6	3	5	4	5	5	Q14011	Q14011	Homo sapiens	CIRBP_HUMAN	Cold-inducible RNA-binding protein	CIRBP
6486.77	2383.05	4828.22	5163.17	6563.01	3191.52	4172.34	2356.66	4246.71	4516.42	2701.54	4104.13	3899.87	1201.16	4499.39	2519.5	1575.64	4428.87	4	4	4	4	4	4	4	4	4	4	4	4	4	3	4	2	4	4	Q9NZ45	Q9NZ45	Homo sapiens	CISD1_HUMAN	CDGSH iron-sulfur domain-containing protein 1	CISD1
20164.3	9609.09	15560.4	14555.9	20924.5	11738.9	13719.8	13169.8	16277.8	15852.7	11007.1	14589.5	18201.6	15285.4	15410.4	10943.3	10100.1	14825.1	6	5	6	6	6	6	5	6	5	6	5	6	6	5	6	5	6	6	Q8N5K1	Q8N5K1	Homo sapiens	CISD2_HUMAN	CDGSH iron-sulfur domain-containing protein 2	CISD2
1537.49	801.06	880.792	1479.98	2494.23	1122.38	226.229	1544.51	2320.69	1571.7	461.552	1089.33	1695.33	1039.99	2229.65	NaN	NaN	1591.23	1	3	3	4	4	2	1	4	4	5	2	5	5	2	3	0	0	5	A0A7I2V4A6;A0A7I2V4H7;A0A7I2V4I0;A0A7I2V692;H7BYJ3;O14578;O14578-3;O14578-4	A0A7I2V4A6;A0A7I2V4H7;A0A7I2V4I0;A0A7I2V692;H7BYJ3;O14578;O14578-3;O14578-4	Homo sapiens	A0A7I2V4A6_HUMAN;A0A7I2V4H7_HUMAN;A0A7I2V4I0_HUMAN;A0A7I2V692_HUMAN;H7BYJ3_HUMAN;CTRO_HUMAN;CTRO_HUMAN;CTRO_HUMAN	Isoform of O14578, Citron rho-interacting serine/threonine kinase;Isoform of O14578, Citron rho-interacting serine/threonine kinase;Isoform of O14578, Citron rho-interacting serine/threonine kinase;Isoform of O14578, Citron rho-interacting serine/threonine kinase;Isoform of O14578, non-specific serine/threonine protein kinase (Fragment);Citron Rho-interacting kinase;Isoform of O14578, Isoform 3 o…	CIT
431907	400693	265735	242125	360950	291388	502421	381221	335764	270829	344451	399780	326583	357512	400821	430798	652915	369213	83	79	84	85	84	80	77	84	79	84	73	81	82	67	79	74	85	84	Q07065	Q07065	Homo sapiens	CKAP4_HUMAN	Cytoskeleton-associated protein 4	CKAP4
27560.6	26105	30309.6	28499.4	32566.2	29393.8	25905.2	34468.5	35571.1	30835.5	29606.7	28183.4	26093	32069.9	34860	33662.4	27722.4	28781.3	49	47	57	59	57	52	45	56	51	58	38	51	51	33	55	36	45	50	Q14008;Q14008-2	Q14008;Q14008-2	Homo sapiens	CKAP5_HUMAN	Cytoskeleton-associated protein 5;Isoform of Q14008, Isoform 2 of Cytoskeleton-associated protein 5	CKAP5
49546.1	97510.8	59415.4	67353.3	45895.9	55744.4	70627.6	76431.9	42667.2	81584.8	45130.2	48221	316965	109984	127213	27466.2	57065	39598	18	19	21	20	20	16	16	20	15	22	15	17	22	15	22	7	15	14	P12277	P12277	Homo sapiens	KCRB_HUMAN	Creatine kinase B-type	CKB
1697.07	NaN	1827.32	1618.07	3004.63	1463.85	NaN	2670.98	3168.24	2861.55	2387.42	3088.79	2064.49	3247.76	2238.64	NaN	NaN	1901.72	3	0	4	3	4	1	0	2	2	4	3	3	4	1	5	0	0	4	P61024;Q5T179	P61024;Q5T179	Homo sapiens	CKS1_HUMAN;Q5T179_HUMAN	Cyclin-dependent kinases regulatory subunit 1;Isoform of P61024, Cyclin-dependent kinases regulatory subunit	CKS1B
3685.84	NaN	6932.13	4610.25	10816.2	944.784	NaN	1324.58	1072.78	2065.32	258419	1951.26	1375.66	725.326	2099.75	NaN	NaN	2163.98	2	0	2	2	1	1	0	2	2	2	1	2	1	2	2	0	0	1	P33552	P33552	Homo sapiens	CKS2_HUMAN	Cyclin-dependent kinases regulatory subunit 2	CKS2
8918.41	10104.6	9269.7	9369.85	10289.2	10043.4	7940.74	10364.9	9251.51	9854.85	10170.8	10329.8	10955	12161.6	11698.1	8275.93	9402.01	9558.37	15	14	16	17	14	15	9	13	12	19	11	13	15	6	15	4	12	14	A0A8V8TLP7;A0A8V8TQK9;A0A8V8TRF6;F8WA11;Q7Z460;Q7Z460-2;Q7Z460-3;Q7Z460-4;Q7Z460-5	A0A8V8TLP7;A0A8V8TQK9;A0A8V8TRF6;F8WA11;Q7Z460;Q7Z460-2;Q7Z460-3;Q7Z460-4;Q7Z460-5	Homo sapiens	A0A8V8TLP7_HUMAN;A0A8V8TQK9_HUMAN;A0A8V8TRF6_HUMAN;F8WA11_HUMAN;CLAP1_HUMAN;CLAP1_HUMAN;CLAP1_HUMAN;CLAP1_HUMAN;CLAP1_HUMAN	Isoform of Q7Z460, Cytoplasmic linker associated protein 1;Isoform of Q7Z460, Cytoplasmic linker associated protein 1;Isoform of Q7Z460, Cytoplasmic linker associated protein 1;Isoform of Q7Z460, Cytoplasmic linker associated protein 1;CLIP-associating protein 1;Isoform of Q7Z460, Isoform 2 of CLIP-associating protein 1;Isoform of Q7Z460, Isoform 3 of CLIP-associating protein 1;Isoform of Q7Z460,…	CLASP1
7699.07	6462.49	6801.95	5843.31	6795.66	7171.16	5008.37	6559.22	6748.82	6555.44	5003.35	6075.41	6342.58	9257.62	5726.15	4347.95	4093.65	6655.93	7	5	9	8	8	8	4	9	6	9	5	5	6	2	9	4	8	7	A0A0U1RQI6;A0A804HJG7;E3W994;E7ERI8;E7EW49;J3KR49;O75122;O75122-3	A0A0U1RQI6;A0A804HJG7;E3W994;E7ERI8;E7EW49;J3KR49;O75122;O75122-3	Homo sapiens	A0A0U1RQI6_HUMAN;A0A804HJG7_HUMAN;E3W994_HUMAN;E7ERI8_HUMAN;E7EW49_HUMAN;J3KR49_HUMAN;CLAP2_HUMAN;CLAP2_HUMAN	Isoform of O75122, Cytoplasmic linker associated protein 2;Isoform of O75122, Cytoplasmic linker associated protein 2;Isoform of O75122, Cytoplasmic linker associated protein 2;Isoform of O75122, Cytoplasmic linker associated protein 2;Isoform of O75122, Cytoplasmic linker associated protein 2;Isoform of O75122, Cytoplasmic linker associated protein 2;CLIP-associating protein 2;Isoform of O75122,…	CLASP2
17376.1	17377.6	15709.2	15548.5	18862.5	15194.1	17167.9	15727.2	13475.4	18282.5	15820.9	19714	16109.1	10606.4	17015.2	13472	20690.9	14876	9	9	9	9	9	9	9	9	8	9	8	9	9	5	9	8	9	8	A0A6Q8PEZ7;A0A6Q8PG30;A0A6Q8PG75;A0A6Q8PGA4;A0A6Q8PHQ1;A0A8I5KRC0;Q96S66;Q96S66-2;Q96S66-3	A0A6Q8PEZ7;A0A6Q8PG30;A0A6Q8PG75;A0A6Q8PGA4;A0A6Q8PHQ1;A0A8I5KRC0;Q96S66;Q96S66-2;Q96S66-3	Homo sapiens	A0A6Q8PEZ7_HUMAN;A0A6Q8PG30_HUMAN;A0A6Q8PG75_HUMAN;A0A6Q8PGA4_HUMAN;A0A6Q8PHQ1_HUMAN;A0A8I5KRC0_HUMAN;CLCC1_HUMAN;CLCC1_HUMAN;CLCC1_HUMAN	Isoform of Q96S66, Chloride channel CLIC-like protein 1;Isoform of Q96S66, Chloride channel CLIC-like protein 1;Isoform of Q96S66, Chloride channel CLIC-like protein 1;Isoform of Q96S66, Chloride channel CLIC-like protein 1;Isoform of Q96S66, Chloride channel CLIC-like protein 1;Isoform of Q96S66, Chloride channel CLIC-like protein 1;Chloride channel CLIC-like protein 1;Isoform of Q96S66, Isoform…	CLCC1
1335.12	656.668	1010.25	1590.06	1304.09	1539.8	1892.98	665.173	1618.4	552.342	1849.46	1257.15	577.857	1021.94	539.119	3299.85	1132.78	1461.57	2	3	3	3	3	3	3	3	3	3	2	2	3	2	3	1	3	3	A0A8V8TPE0;P51798;P51798-2	A0A8V8TPE0;P51798;P51798-2	Homo sapiens	A0A8V8TPE0_HUMAN;CLCN7_HUMAN;CLCN7_HUMAN	Isoform of P51798, Chloride voltage-gated channel 7;H(+)/Cl(-) exchange transporter 7;Isoform of P51798, Isoform 2 of H(+)/Cl(-) exchange transporter 7	CLCN7
2757.65	NaN	7391.57	7990.79	3546.33	4098.01	6645.35	NaN	70.139	NaN	NaN	1213.45	6714.47	NaN	722.298	95.7021	2409.1	676.586	3	0	3	3	3	3	3	0	2	0	0	1	3	0	2	2	3	1	O75508	O75508	Homo sapiens	CLD11_HUMAN	Claudin-11	CLDN11
3463.12	4615.47	1870.67	2543.8	3545.08	2752.73	2787.6	4953.13	3629.85	3370.17	1163.46	2458.41	2781.54	5075.52	2870.32	6756.1	2780.14	3519.33	4	3	4	4	4	4	4	4	4	3	2	4	3	2	4	1	4	4	Q9Y240	Q9Y240	Homo sapiens	CLC11_HUMAN	C-type lectin domain family 11 member A	CLEC11A
NaN	37168.9	38210.9	26525.4	19547.1	51127.1	51881.1	25221.7	39748.8	27527.5	43190.7	23567.9	22830.7	42389	26845.8	37971.4	18003	30761.3	0	1	3	1	1	3	3	3	3	2	1	2	4	1	3	1	2	2	E9PHK0;P05452	E9PHK0;P05452	Homo sapiens	E9PHK0_HUMAN;TETN_HUMAN	Isoform of P05452, C-type lectin domain family 3 member B;Tetranectin	CLEC3B
1336.03	1639.27	559.088	451.507	1300.4	NaN	2319.79	1044.7	1235.83	1089.47	NaN	1743.46	1112.67	NaN	946.568	NaN	NaN	NaN	1	1	2	2	2	0	1	1	2	1	0	1	2	0	1	0	0	0	O14967-2	O14967-2	Homo sapiens	CLGN_HUMAN	Isoform of O14967, Isoform 2 of Calmegin	CLGN
316140	438775	426067	450804	430152	497801	363295	518344	428779	492142	428343	432698	493925	449062	414088	456382	445479	408943	16	16	23	23	16	20	17	20	21	22	18	17	21	14	20	16	21	21	O00299	O00299	Homo sapiens	CLIC1_HUMAN	Chloride intracellular channel protein 1	CLIC1
19707.2	16061.3	9090.2	6285.15	9490.89	NaN	34991.1	29128.2	12139.7	10142.1	18082.7	24021.4	12648.2	NaN	18710	NaN	32756.1	15033.7	5	4	4	6	3	0	6	6	5	4	3	5	6	0	6	0	7	3	O95833	O95833	Homo sapiens	CLIC3_HUMAN	Chloride intracellular channel protein 3	CLIC3
95789.4	101346	109115	105911	79629.4	91019	73185	89805	80669.9	126306	81743.5	84041.5	84474.6	69834.5	91653.1	49867.1	123133	95112.7	24	25	28	31	25	27	22	29	25	31	19	24	27	15	29	13	25	29	Q9Y696	Q9Y696	Homo sapiens	CLIC4_HUMAN	Chloride intracellular channel protein 4	CLIC4
14101.1	10758.5	10673.4	9256.61	12749.3	11251.7	11874.4	10774.1	12775.1	10582.9	10736.5	10843.9	9986.8	10785.8	11224.3	9379.73	10245.4	11409.1	18	18	18	18	18	18	18	18	18	18	17	18	18	14	19	15	18	18	Q14677;Q14677-3	Q14677;Q14677-3	Homo sapiens	EPN4_HUMAN	Clathrin interactor 1;Isoform of Q14677, Isoform 3 of Clathrin interactor 1	CLINT1
14178.5	18589.3	15885.7	14610.7	17151.7	18223.7	16035.1	16403.4	16752.9	15538.7	20338.4	16665	15430.9	16768.3	15875.1	21653.6	13496.6	19075.1	50	54	55	55	52	53	47	52	50	55	47	53	48	34	53	41	48	52	P30622-2	P30622-2	Homo sapiens	CLIP1_HUMAN	Isoform of P30622, Isoform 3 of CAP-Gly domain-containing linker protein 1	CLIP1
7776.89	9776.58	7284.27	6881.87	7279.49	8566.08	7274.87	8140.22	6111.4	7643.59	10914.6	5988.72	9635.41	7170.88	7181.66	14095.7	4686.14	6524.54	23	25	26	27	23	23	20	25	22	26	22	22	27	13	24	21	17	22	Q9UDT6-2	Q9UDT6-2	Homo sapiens	CLIP2_HUMAN	Isoform of Q9UDT6, Isoform 2 of CAP-Gly domain-containing linker protein 2	CLIP2
945.127	361.771	539.816	NaN	796.754	286.643	759.064	865.035	NaN	892.391	NaN	710.041	199.616	NaN	NaN	NaN	NaN	203.443	1	1	1	0	1	1	1	1	0	1	0	1	1	0	0	0	0	1	P49761;P49761-1;P49761-3	P49761;P49761-1;P49761-3	Homo sapiens	CLK3_HUMAN	Dual specificity protein kinase CLK3;Isoform of P49761, Isoform 1 of Dual specificity protein kinase CLK3;Isoform of P49761, Isoform 3 of Dual specificity protein kinase CLK3	CLK3
12696.2	13573.4	7820.15	10081	15459.1	10689.9	12388.8	10603.4	12623.4	11656.7	15563.4	16969.1	12939.1	24467.6	11372.3	19968.7	4362.16	16553.9	4	5	6	6	5	5	5	5	6	6	4	5	5	4	6	4	4	5	Q9H6B4	Q9H6B4	Homo sapiens	CLMP_HUMAN	CXADR-like membrane protein	CLMP
2299.01	1000.39	1193.91	1556.96	1164.88	1690.54	1080.53	704.966	2282.91	1863.17	1302.71	1413.4	765.817	NaN	1113.17	541.417	796.998	787.038	1	1	1	1	1	1	1	1	1	1	1	1	1	0	1	1	1	1	A0A1B0GV71;A0A1B0GW34;A0A1B0GWD3;B4DFF3;H3BNK7;H3BR00;O95086;Q13286;Q13286-2;Q13286-3;Q13286-4;Q13286-5;Q13286-7;Q2TA70;Q9UBD8	A0A1B0GV71;A0A1B0GW34;A0A1B0GWD3;B4DFF3;H3BNK7;H3BR00;O95086;Q13286;Q13286-2;Q13286-3;Q13286-4;Q13286-5;Q13286-7;Q2TA70;Q9UBD8	Homo sapiens	A0A1B0GV71_HUMAN;A0A1B0GW34_HUMAN;A0A1B0GWD3_HUMAN;B4DFF3_HUMAN;H3BNK7_HUMAN;H3BR00_HUMAN;O95086_HUMAN;CLN3_HUMAN;CLN3_HUMAN;CLN3_HUMAN;CLN3_HUMAN;CLN3_HUMAN;CLN3_HUMAN;Q2TA70_HUMAN;Q9UBD8_HUMAN	Isoform of Q13286, Battenin;Isoform of Q13286, Battenin;Isoform of Q13286, Battenin;Isoform of Q13286, Battenin;Isoform of Q13286, Battenin (Fragment);Isoform of Q13286, Battenin;Isoform of Q13286, Battenin;Battenin;Isoform of Q13286, Isoform 2 of Battenin;Isoform of Q13286, Isoform 3 of Battenin;Isoform of Q13286, Isoform 4 of Battenin;Isoform of Q13286, Isoform 5 of Battenin;Isoform of Q13286, …	CLN3
4834.71	1314.48	2161.04	3783.53	2406.49	3907.58	3964.53	2884.4	1528.53	1254.71	3683.88	2654.59	1502.17	NaN	1652.41	NaN	4228	1753.65	2	2	2	2	2	2	2	2	2	2	2	2	2	0	3	0	2	2	A0A1B0GWI2;O75503	A0A1B0GWI2;O75503	Homo sapiens	A0A1B0GWI2_HUMAN;CLN5_HUMAN	Isoform of O75503, CLN5 intracellular trafficking protein (Fragment);Ceroid-lipofuscinosis neuronal protein 5	CLN5
NaN	361.808	1968.59	1315.55	1645.64	2021.21	2376.18	1383.66	1746.11	1960.47	1269.39	1858.2	1226.91	NaN	2922.68	NaN	1657.94	717.397	0	1	1	2	2	1	1	1	1	2	1	1	1	0	1	0	1	1	A0A0S2Z5D0;A0A1B0GTU6;A0A1B0GTV3;A0A1B0GUD2;A0A1B0GW73;H3BNF1;H3BUT1;H3BUV4;Q9NWW5	A0A0S2Z5D0;A0A1B0GTU6;A0A1B0GTV3;A0A1B0GUD2;A0A1B0GW73;H3BNF1;H3BUT1;H3BUV4;Q9NWW5	Homo sapiens	A0A0S2Z5D0_HUMAN;A0A1B0GTU6_HUMAN;A0A1B0GTV3_HUMAN;A0A1B0GUD2_HUMAN;A0A1B0GW73_HUMAN;H3BNF1_HUMAN;H3BUT1_HUMAN;H3BUV4_HUMAN;CLN6_HUMAN	Isoform of Q9NWW5, CLN6 transmembrane ER protein;Isoform of Q9NWW5, CLN6 transmembrane ER protein (Fragment);Isoform of Q9NWW5, CLN6 transmembrane ER protein;Isoform of Q9NWW5, CLN6 transmembrane ER protein;readthrough, Uncharacterized protein;Isoform of Q9NWW5, CLN6 transmembrane ER protein;Isoform of Q9NWW5, CLN6 transmembrane ER protein;Isoform of Q9NWW5, CLN6 transmembrane ER protein;Ceroid-l…	CLN6
15952	16695.4	17076.2	16338.7	19024.8	15637	13684	16434.8	18424.8	21523.1	13056.3	16930.1	14813.9	15357.2	17993.7	16139.4	9195.42	19252.7	4	4	4	4	4	4	4	4	4	4	4	4	4	3	4	2	4	4	E9PMI6;J3KN38;P54105	E9PMI6;J3KN38;P54105	Homo sapiens	E9PMI6_HUMAN;J3KN38_HUMAN;ICLN_HUMAN	Isoform of P54105, Methylosome subunit pICln;Isoform of P54105, Methylosome subunit pICln;Methylosome subunit pICln	CLNS1A
8098.47	8815.09	7220.9	7966.67	8006.37	8138.48	10049.6	7635.3	7800.89	8783.44	7011.24	8913.12	10991.7	9291.16	8485.51	1817.58	6230.55	5698.94	7	8	9	9	8	8	7	7	8	7	5	7	8	6	8	2	7	8	Q9H078-2	Q9H078-2	Homo sapiens	CLPB_HUMAN	Isoform of Q9H078, Isoform 2 of Caseinolytic peptidase B protein homolog	CLPB
8131.59	5090.5	8714.76	7818.6	7171.41	5151.79	7258.18	6290.59	7015.91	7930.08	5513.56	6426.82	8460.89	8255.59	6359.43	7192.4	6297.82	5495.93	9	7	9	9	7	8	7	8	8	9	7	8	7	4	7	5	7	9	Q16740	Q16740	Homo sapiens	CLPP_HUMAN	ATP-dependent Clp protease proteolytic subunit, mitochondrial	CLPP
19445.6	19305.4	18731.8	18483.7	20351.9	21824.5	27046.3	18569	27471.8	21729.2	19198.6	22323.4	20723	19728.4	23664.2	19323.6	13806.9	11985	10	10	13	13	12	11	10	10	9	13	5	13	9	3	12	6	10	9	O96005	O96005	Homo sapiens	CLPT1_HUMAN	Putative lipid scramblase CLPTM1	CLPTM1
6093.5	7609.16	8161.3	5838.18	7629.46	6628.16	9308.08	5846.46	8741.87	6655.62	6765.08	8156.15	6134.81	7085.04	8525.59	4346.42	8482.16	5910.25	5	5	6	5	6	5	5	5	5	5	5	5	5	4	6	4	5	6	Q96KA5;Q96KA5-2	Q96KA5;Q96KA5-2	Homo sapiens	CLP1L_HUMAN	Lipid scramblase CLPTM1L;Isoform of Q96KA5, Isoform 2 of Lipid scramblase CLPTM1L	CLPTM1L
8411.49	6713.77	6717.29	8005.97	9024.6	5907.92	7626.46	6810.21	7593.4	7755.43	4262.71	6994.14	8320.97	7222.72	8545.54	3738.92	5281.76	5725.46	14	14	16	15	16	16	14	15	14	15	13	16	15	12	14	7	12	11	O76031	O76031	Homo sapiens	CLPX_HUMAN	ATP-dependent Clp protease ATP-binding subunit clpX-like, mitochondrial	CLPX
65697.2	60279.6	65266.5	62327.9	64812.4	73392.8	66479.2	67519.7	66714.9	55473.8	82504.9	61849.2	51081.7	58015.1	52252.9	79329	76004.7	58983.4	11	12	14	14	11	13	12	12	14	16	11	12	12	10	15	9	13	14	P09496-2	P09496-2	Homo sapiens	CLCA_HUMAN	Isoform of P09496, Isoform Non-brain of Clathrin light chain A	CLTA
13925.2	17574.1	13719.8	12170.5	12923.6	13356.2	15940.2	14437	12784.2	10406.5	16971.8	13873.4	15703.6	13731.5	14835.7	26769.6	22792.4	13654.3	6	6	8	9	6	7	6	7	7	8	5	8	7	5	11	7	6	6	P09497-2	P09497-2	Homo sapiens	CLCB_HUMAN	Isoform of P09497, Isoform Non-brain of Clathrin light chain B	CLTB
331323	337601	343774	334241	323763	377591	343903	351194	334763	295960	391970	309896	290599	337627	295194	412277	439350	323548	108	98	129	133	108	113	107	115	113	129	94	112	121	76	116	89	120	110	A0A087WVQ6;A0A8V8TQ14;A0A8V8TR47;A0A8V8TRF0;K7EJJ5;Q00610;Q00610-2	A0A087WVQ6;A0A8V8TQ14;A0A8V8TR47;A0A8V8TRF0;K7EJJ5;Q00610;Q00610-2	Homo sapiens	A0A087WVQ6_HUMAN;A0A8V8TQ14_HUMAN;A0A8V8TR47_HUMAN;A0A8V8TRF0_HUMAN;K7EJJ5_HUMAN;CLH1_HUMAN;CLH1_HUMAN	Isoform of Q00610, Clathrin heavy chain;Isoform of Q00610, Clathrin heavy chain;Isoform of Q00610, Clathrin heavy chain;Isoform of Q00610, Clathrin heavy chain;Isoform of Q00610, Clathrin heavy chain;Clathrin heavy chain 1;Isoform of Q00610, Isoform 2 of Clathrin heavy chain 1	CLTC
7597.22	12488.3	1902.9	4054.33	7009.11	NaN	3243.98	NaN	2495.61	2103.8	NaN	2683.34	3588.51	NaN	2816.94	1623.28	NaN	3597.59	5	5	4	5	5	0	3	0	5	3	0	3	4	0	4	1	0	5	P10909;P10909-2;P10909-4;P10909-5;P10909-6	P10909;P10909-2;P10909-4;P10909-5;P10909-6	Homo sapiens	CLUS_HUMAN	Clusterin;Isoform of P10909, Isoform 2 of Clusterin;Isoform of P10909, Isoform 4 of Clusterin;Isoform of P10909, Isoform 5 of Clusterin;Isoform of P10909, Isoform 6 of Clusterin	CLU
8881.7	10366.2	10615.6	10806.3	12093.8	11211.1	10419.5	10279.3	14732.2	13783.5	9800.21	12639.1	10645.5	17887.1	11484.5	10223.4	5010.03	13229.4	20	20	23	23	22	21	22	24	23	23	19	22	23	18	22	13	16	23	A0A494C0R8	A0A494C0R8	Homo sapiens	A0A494C0R8_HUMAN	Isoform of O75153, Clustered mitochondria protein homolog	CLUH
5449.27	4426.34	4803.6	4896.34	3985.99	4760.41	3489.75	4822.45	5210.49	4903.64	7364.88	4263.76	6693.27	3291.27	5369.2	11866.4	9272.84	5050.78	6	6	8	7	6	6	5	7	6	7	6	7	7	5	8	6	7	7	Q96DG6	Q96DG6	Homo sapiens	CMBL_HUMAN	Carboxymethylenebutenolidase homolog	CMBL
22665.8	9649.93	24699.3	16950.5	16883.7	10483.1	16239.3	14560.1	14585	18267.5	11221.3	14316.4	24792	12748.3	14652.6	14719.5	18752.5	9722.32	1	1	1	1	1	1	1	1	1	1	1	1	1	1	1	1	1	1	Q7Z7K0	Q7Z7K0	Homo sapiens	COXM1_HUMAN	COX assembly mitochondrial protein homolog	CMC1
7867.83	4344.56	9140.2	8811.35	11972.4	6505.31	7335.22	8151.94	8805.31	6942.92	5890.47	9903.96	10752.5	7200.66	9263.24	7317.62	2549.64	9087.83	1	1	1	1	1	1	1	1	1	1	1	1	1	1	1	1	1	1	H3BPP2;Q9NRP2	H3BPP2;Q9NRP2	Homo sapiens	H3BPP2_HUMAN;COXM2_HUMAN	Isoform of Q9NRP2, COX assembly mitochondrial protein;COX assembly mitochondrial protein 2 homolog	CMC2
41062.1	46488.4	41326.7	39631.9	35305.8	39386.3	41045.3	41638.6	37989.9	34878.8	43674.7	42798.5	36275.5	39903.5	42503	53267.1	57016.9	31456.9	13	11	14	13	11	11	12	11	10	13	9	13	12	7	12	9	12	11	P30085;P30085-3	P30085;P30085-3	Homo sapiens	KCY_HUMAN	UMP-CMP kinase;Isoform of P30085, Isoform 3 of UMP-CMP kinase	CMPK1
374.617	NaN	400.152	537.096	256.514	694.094	202.883	405.089	NaN	762.655	1.22607	485.633	842.195	NaN	498.208	NaN	419.356	698.923	1	0	2	2	2	1	1	1	0	2	1	2	1	0	1	0	1	1	Q8N1G2	Q8N1G2	Homo sapiens	CMTR1_HUMAN	Cap-specific mRNA (nucleoside-2'-O-)-methyltransferase 1	CMTR1
NaN	NaN	521.948	452.837	NaN	NaN	NaN	NaN	271.831	855.949	NaN	NaN	364.917	NaN	NaN	NaN	NaN	NaN	0	0	1	1	0	0	0	0	1	1	0	0	1	0	0	0	0	0	P62633;P62633-2;P62633-3;P62633-4;P62633-5;P62633-6;P62633-7;P62633-8	P62633;P62633-2;P62633-3;P62633-4;P62633-5;P62633-6;P62633-7;P62633-8	Homo sapiens	CNBP_HUMAN	CCHC-type zinc finger nucleic acid binding protein;Isoform of P62633, Isoform 2 of CCHC-type zinc finger nucleic acid binding protein;Isoform of P62633, Isoform 3 of CCHC-type zinc finger nucleic acid binding protein;Isoform of P62633, Isoform 4 of CCHC-type zinc finger nucleic acid binding protein;Isoform of P62633, Isoform 5 of CCHC-type zinc finger nucleic acid binding protein;Isoform of P6263…	CNBP
98156.5	99401.9	113115	112703	74236	115179	107216	105507	91175.2	149937	106530	107009	94025.6	121445	91001.1	135811	157623	128641	26	26	26	27	25	24	25	25	24	26	24	24	26	17	25	21	28	25	Q96KP4	Q96KP4	Homo sapiens	CNDP2_HUMAN	Cytosolic non-specific dipeptidase	CNDP2
42288.5	29159.9	59877.1	71273.8	39627.7	39865.5	37159.4	32030.6	60903.9	52641.1	25257.8	25574.7	42652.7	22844.3	32405.9	21408.3	38520.5	36331.4	1	1	1	1	1	1	1	1	1	1	1	1	1	1	1	1	1	1	A6NLH6;Q9P003	A6NLH6;Q9P003	Homo sapiens	A6NLH6_HUMAN;CNIH4_HUMAN	Isoform of Q9P003, Cornichon family AMPA receptor auxiliary protein 4;Protein cornichon homolog 4	CNIH4
16198.8	16836.6	50843.4	24254.2	16555.2	47204	10801.7	29612.2	68340.6	17148.1	19180	34286.2	6928.33	30671.5	18192.3	10125	45208.8	32161.2	9	7	14	14	7	13	5	11	13	13	9	14	6	5	12	3	14	12	P51911	P51911	Homo sapiens	CNN1_HUMAN	Calponin-1	CNN1
47321.7	41607	38816	57322.7	31610.2	57968.2	33432.5	44420	39924.6	58220.8	40303.1	44503.5	37482.3	36847.9	40937.5	26235.1	80824.6	57345.6	17	16	21	20	17	20	14	20	19	21	14	17	17	12	20	12	19	18	B4DDF4;B4DUT8;Q99439	B4DDF4;B4DUT8;Q99439	Homo sapiens	B4DDF4_HUMAN;B4DUT8_HUMAN;CNN2_HUMAN	Isoform of Q99439, Calponin;Isoform of Q99439, Calponin;Calponin-2	CNN2
61112.7	97920.3	91424.4	88265.7	70004.3	103311	74379.2	100149	94657.4	85045.9	102548	84981.9	48767	73909.7	64790.1	52396.5	179237	136590	8	8	10	11	9	11	10	10	10	10	9	9	9	7	11	8	10	10	Q15417-2	Q15417-2	Homo sapiens	CNN3_HUMAN	Isoform of Q15417, Isoform 2 of Calponin-3	CNN3
1598.49	1303.13	NaN	820.719	1371.49	NaN	1057.92	825.606	610.406	1185.02	1105.21	1303.19	1141.24	527.803	420.185	NaN	594.607	822.655	1	1	0	2	2	0	1	2	1	2	2	1	2	1	2	0	1	1	Q8NE01;Q8NE01-2;Q8NE01-3	Q8NE01;Q8NE01-2;Q8NE01-3	Homo sapiens	CNNM3_HUMAN	Metal transporter CNNM3;Isoform of Q8NE01, Isoform 2 of Metal transporter CNNM3;Isoform of Q8NE01, Isoform 3 of Metal transporter CNNM3	CNNM3
9618.81	8447.62	9224.9	9518.43	9682.94	8153.75	6566.02	9509.32	8265.23	9912.08	7501.96	9262.3	10025.7	8319.42	9273.12	6287.41	6414.99	8721.83	32	30	33	35	33	31	31	32	31	36	27	34	33	20	33	22	30	34	A5YKK6	A5YKK6	Homo sapiens	CNOT1_HUMAN	CCR4-NOT transcription complex subunit 1	CNOT1
6989.69	5891.95	5573.1	6200.22	7469.01	4623.04	4735.18	2281.26	5102.86	5597.41	5097.68	6709.06	5390.99	3347.45	4712.49	4208.19	3913.42	5020.64	4	3	5	4	3	4	3	4	3	4	2	3	5	1	5	1	2	2	Q9H9A5;Q9H9A5-2;Q9H9A5-6	Q9H9A5;Q9H9A5-2;Q9H9A5-6	Homo sapiens	CNO10_HUMAN	CCR4-NOT transcription complex subunit 10;Isoform of Q9H9A5, Isoform 2 of CCR4-NOT transcription complex subunit 10;Isoform of Q9H9A5, Isoform 6 of CCR4-NOT transcription complex subunit 10	CNOT10
2243.53	3635.73	3026.58	2944.8	3408.52	3425.56	1769.4	3666.37	2550.02	3530.96	2591.67	3412.38	3078.48	3993.49	2862.63	1688.86	2872.13	3730.51	1	1	1	1	1	1	1	1	1	1	1	1	1	1	1	1	1	1	Q9UKZ1	Q9UKZ1	Homo sapiens	CNO11_HUMAN	CCR4-NOT transcription complex subunit 11	CNOT11
11330.9	9978.87	10661.1	11893	12632.6	10124.5	6170.5	9090.08	5072.6	10624.3	8125.66	6477.62	10107.5	8945.67	8683.97	5795.27	5734.98	11775.8	3	4	4	4	4	2	3	4	2	4	2	4	3	2	4	2	4	3	F8VUB4;F8VV52;Q9NZN8	F8VUB4;F8VV52;Q9NZN8	Homo sapiens	F8VUB4_HUMAN;F8VV52_HUMAN;CNOT2_HUMAN	Isoform of Q9NZN8, CCR4-NOT transcription complex subunit 2;Isoform of Q9NZN8, CCR4-NOT transcription complex subunit 2 (Fragment);CCR4-NOT transcription complex subunit 2	CNOT2
6418.85	6926.71	6078.14	7322.21	6415.77	6925.83	5824.49	6796.8	7358.46	7051.81	5712.66	5982.09	6837.53	11551.2	6805.28	5215.76	5246.09	7517.91	5	6	7	6	7	6	5	7	6	6	4	7	6	3	7	3	6	6	B7Z6J7;O75175	B7Z6J7;O75175	Homo sapiens	B7Z6J7_HUMAN;CNOT3_HUMAN	Isoform of O75175, CCR4-NOT transcription complex subunit 3;CCR4-NOT transcription complex subunit 3	CNOT3
1719.47	NaN	1071.84	1191.69	1911.3	NaN	NaN	1966.16	1677.35	1197.43	NaN	1108.52	1747.91	NaN	1254.61	NaN	NaN	NaN	1	0	1	1	1	0	0	1	1	1	0	1	1	0	1	0	0	0	H0Y9C1;H0Y9Z5;Q96LI5;Q9ULM6	H0Y9C1;H0Y9Z5;Q96LI5;Q9ULM6	Homo sapiens	H0Y9C1_HUMAN;H0Y9Z5_HUMAN;CNO6L_HUMAN;CNOT6_HUMAN	Isoform of Q96LI5, poly(A)-specific ribonuclease;Isoform of Q96LI5, poly(A)-specific ribonuclease;CCR4-NOT transcription complex subunit 6-like;CCR4-NOT transcription complex subunit 6	CNOT6L
4105.9	2982.86	4483.32	5716.64	4268.52	3731.28	1823.74	6682.55	3820.3	5409.84	3352.43	3606.34	4061.7	2578.38	3965.07	1631.45	2551.51	4882.86	3	3	4	4	4	4	1	4	4	4	1	4	3	2	4	1	2	4	Q9UIV1;Q9UIV1-2	Q9UIV1;Q9UIV1-2	Homo sapiens	CNOT7_HUMAN	CCR4-NOT transcription complex subunit 7;Isoform of Q9UIV1, Isoform 2 of CCR4-NOT transcription complex subunit 7	CNOT7
4195.93	3965.17	4034.43	4790.87	3700.77	3391.07	2007.6	3466.94	3041.99	4337.45	3679.17	3472.28	4241.52	1373.22	3873.36	1290.37	2579.34	4041.17	6	6	5	6	5	4	5	5	6	5	4	6	5	4	6	2	5	5	Q92600	Q92600	Homo sapiens	CNOT9_HUMAN	CCR4-NOT transcription complex subunit 9	CNOT9
30214.9	20353.6	23839.1	26448.5	29357	21453.1	28340.4	26525.1	22360.9	26066.7	25021	26569.6	29681.9	29842	29219.6	25891.5	35861.3	25847.9	16	13	16	16	14	14	15	15	14	16	11	16	15	10	18	11	16	14	P09543;P09543-2	P09543;P09543-2	Homo sapiens	CN37_HUMAN	2',3'-cyclic-nucleotide 3'-phosphodiesterase;Isoform of P09543, Isoform CNPI of 2',3'-cyclic-nucleotide 3'-phosphodiesterase	CNP
34175.1	38363.8	31791.6	27072.7	29803.5	25371.4	36731	26263.1	27051.7	27630	34898.4	30114.5	24575.2	25978.7	27895.8	36925.9	43190.1	25637.4	10	9	13	13	10	10	9	9	9	13	8	10	9	9	11	9	9	8	Q9Y2B0	Q9Y2B0	Homo sapiens	CNPY2_HUMAN	Protein canopy homolog 2	CNPY2
6188.27	11091.9	7936.1	5055.61	8189.8	6876.97	9020.27	8808.31	5461.31	5375.46	9889.25	7246.34	4783.91	4503.87	8225.9	9960.05	7013.63	6000.82	4	3	4	5	4	3	4	3	2	5	2	5	5	1	4	3	4	3	Q9BT09	Q9BT09	Homo sapiens	CNPY3_HUMAN	Protein canopy homolog 3	CNPY3
31315	27267.1	21780.7	23135.3	25050.6	20323.4	33092.1	19022.5	14146.1	21801.6	19423.3	22377.4	22029.6	14883.3	17583.1	18201.3	25665.4	16900.8	11	9	11	11	11	11	10	11	10	11	10	10	9	4	11	7	10	9	Q8N129	Q8N129	Homo sapiens	CNPY4_HUMAN	Protein canopy homolog 4	CNPY4
5457.33	5472.38	5206.88	5196.57	6696.79	5541.4	3599.41	6444.97	6410.1	4363.92	5846.71	5288.56	5459.72	5765.84	5744.12	7758.68	4033.5	4454.91	4	3	3	5	4	3	4	4	4	5	3	4	4	3	4	3	4	5	B8ZZB8;Q96F85;Q96F85-2	B8ZZB8;Q96F85;Q96F85-2	Homo sapiens	B8ZZB8_HUMAN;CNRP1_HUMAN;CNRP1_HUMAN	Isoform of Q96F85, CB1 cannabinoid receptor-interacting protein 1;CB1 cannabinoid receptor-interacting protein 1;Isoform of Q96F85, Isoform 2 of CB1 cannabinoid receptor-interacting protein 1	CNRIP1
1914.02	2712.8	1257.55	1752.9	2504.55	1286.65	2620.65	2358.17	3402.73	1505.05	1882.17	2327.47	2192.27	1794.53	2898.69	1319.46	2331.97	2502.68	2	2	2	2	2	1	2	2	1	2	2	2	1	2	2	2	2	1	Q6PJW8	Q6PJW8	Homo sapiens	CNST_HUMAN	Consortin	CNST
NaN	211.623	NaN	NaN	NaN	NaN	1489.64	NaN	1172.57	NaN	3998.65	720.731	NaN	9818.19	NaN	6891.71	983.67	1701.84	0	1	0	0	0	0	1	0	1	0	1	1	0	2	0	1	1	1	Q12860;Q12860-2	Q12860;Q12860-2	Homo sapiens	CNTN1_HUMAN	Contactin-1;Isoform of Q12860, Isoform 2 of Contactin-1	CNTN1
4654.92	5062.21	2090.39	1965.84	3409.92	1567.07	2608.49	2085.92	NaN	2145.88	1947.2	1633.73	1807.95	NaN	NaN	NaN	NaN	NaN	1	2	1	2	2	2	2	2	0	1	2	2	1	0	0	0	0	0	Q9P232	Q9P232	Homo sapiens	CNTN3_HUMAN	Contactin-3	CNTN3
8385.76	13274	6539.53	9678.98	11608.5	5350	10875.3	10535.1	9857.49	15963.8	7612.45	8992.44	13459.1	8789.4	11827.3	4325.54	12824.2	5619.03	9	12	13	14	12	12	12	11	13	12	8	13	11	5	14	3	12	11	P78357	P78357	Homo sapiens	CNTP1_HUMAN	Contactin-associated protein 1	CNTNAP1
15369.6	11253.3	14444.3	14365.9	13186.7	10849.4	13385.8	13586.8	16387.7	7668.24	6620.46	10006.5	11142.3	5566.46	9188.64	6353.51	9870.12	4706.24	2	2	2	2	2	2	2	2	2	2	2	2	2	2	2	2	2	2	Q9Y2R0	Q9Y2R0	Homo sapiens	COA3_HUMAN	Cytochrome c oxidase assembly factor 3 homolog, mitochondrial	COA3
2825.69	928.146	2356.65	2415.19	584.655	1438.91	NaN	485.941	631.653	2375.54	NaN	1865.25	NaN	NaN	2116.25	NaN	1821.26	2457.6	1	1	1	1	1	1	0	1	1	1	0	1	0	0	1	0	1	1	Q9NYJ1;Q9NYJ1-2	Q9NYJ1;Q9NYJ1-2	Homo sapiens	COA4_HUMAN	Cytochrome c oxidase assembly factor 4 homolog, mitochondrial;Isoform of Q9NYJ1, Isoform 2 of Cytochrome c oxidase assembly factor 4 homolog, mitochondrial	COA4
6834.87	12880.8	13600.7	9986.12	14668.9	12642.1	14084.4	13376	16730.6	17837.1	14934.5	11736.1	17723.3	7273.61	10911.7	27912.6	16630.8	9897.63	1	1	1	1	1	1	1	1	1	1	1	1	1	1	1	1	1	1	Q5JTJ3;Q5JTJ3-2;Q5JTJ3-3	Q5JTJ3;Q5JTJ3-2;Q5JTJ3-3	Homo sapiens	COA6_HUMAN	Cytochrome c oxidase assembly factor 6 homolog;Isoform of Q5JTJ3, Isoform 2 of Cytochrome c oxidase assembly factor 6 homolog;Isoform of Q5JTJ3, Isoform 3 of Cytochrome c oxidase assembly factor 6 homolog	COA6
5151.68	5671.92	5095.83	6108.64	4244.69	5380.11	3994.48	5067.65	4045.21	5701.41	5476.7	3823.38	6010.42	7442.23	5098.46	3432.17	4379.03	4590.96	7	9	9	10	8	8	5	7	7	10	6	8	9	4	7	4	8	6	Q13057;Q13057-2	Q13057;Q13057-2	Homo sapiens	COASY_HUMAN	Bifunctional coenzyme A synthase;Isoform of Q13057, Isoform 2 of Bifunctional coenzyme A synthase	COASY
NaN	3209.78	3042.07	1633.23	6210.41	2138.2	1483.46	2206.09	3140.56	1307.23	3772.53	3194.3	NaN	2173.57	2439.65	2148.21	5710.83	3816.69	0	4	4	3	3	2	2	3	4	2	3	3	0	1	3	2	4	3	A0A0D9SG04;A0A0X1KG75;Q53SF7;Q53SF7-2;Q53SF7-3	A0A0D9SG04;A0A0X1KG75;Q53SF7;Q53SF7-2;Q53SF7-3	Homo sapiens	A0A0D9SG04_HUMAN;A0A0X1KG75_HUMAN;COBL1_HUMAN;COBL1_HUMAN;COBL1_HUMAN	Isoform of Q53SF7, Cordon-bleu WH2 repeat protein like 1;Isoform of Q53SF7, Cordon-bleu WH2 repeat protein like 1;Cordon-bleu protein-like 1;Isoform of Q53SF7, Isoform 2 of Cordon-bleu protein-like 1;Isoform of Q53SF7, Isoform 3 of Cordon-bleu protein-like 1	COBLL1
4396.37	4010.36	4238.77	3795.87	3754.59	3491.64	3406.25	3200.21	3595.18	4054.05	3839.07	3913.24	3727	1976.69	4170.95	3162.19	2800.15	4618.35	10	8	10	9	10	10	7	8	9	9	8	8	9	1	9	3	8	8	Q8WTW3	Q8WTW3	Homo sapiens	COG1_HUMAN	Conserved oligomeric Golgi complex subunit 1	COG1
4733.48	3991.1	5269.13	3288.66	3548.49	3780.97	5499.14	3652.87	4108.26	2929.25	3119.72	4048.28	2956.06	3450.97	3420.76	NaN	2741.21	3900.13	2	2	4	4	3	4	1	2	3	4	2	3	4	1	4	0	3	4	B7Z2Y2;Q14746;Q14746-2	B7Z2Y2;Q14746;Q14746-2	Homo sapiens	B7Z2Y2_HUMAN;COG2_HUMAN;COG2_HUMAN	Isoform of Q14746, Conserved oligomeric Golgi complex subunit 2;Conserved oligomeric Golgi complex subunit 2;Isoform of Q14746, Isoform 2 of Conserved oligomeric Golgi complex subunit 2	COG2
3043.26	4257.28	3945.46	2715.44	2960.01	3584.44	2416.96	3007.29	3001.53	3006.68	2214.28	3907.56	2247.14	2772.24	2080.99	NaN	2653.27	4438.73	2	1	1	2	2	1	1	2	2	1	2	2	2	1	2	0	2	1	Q96JB2;Q96JB2-2	Q96JB2;Q96JB2-2	Homo sapiens	COG3_HUMAN	Conserved oligomeric Golgi complex subunit 3;Isoform of Q96JB2, Isoform 2 of Conserved oligomeric Golgi complex subunit 3	COG3
10819.6	9777.91	11510.1	9079.55	12169.1	10360.1	9229.3	10342.4	11491.2	10623.2	9816.62	11129.7	8275.29	11978.5	10113.5	9679.86	7904.41	10615.9	8	6	9	8	7	6	4	5	5	9	5	8	6	4	8	2	5	7	A0A0A0MS45;A0A6I8PIQ6;J3KNI1;Q9H9E3	A0A0A0MS45;A0A6I8PIQ6;J3KNI1;Q9H9E3	Homo sapiens	A0A0A0MS45_HUMAN;A0A6I8PIQ6_HUMAN;J3KNI1_HUMAN;COG4_HUMAN	Isoform of Q9H9E3, Conserved oligomeric Golgi complex subunit 4;Isoform of Q9H9E3, Conserved oligomeric Golgi complex subunit 4;Isoform of Q9H9E3, Conserved oligomeric Golgi complex subunit 4;Conserved oligomeric Golgi complex subunit 4	COG4
2360.54	3217.91	3985.56	3240.75	2591.92	1995	2387.29	1878.79	2077.82	3290.46	2932.17	3340.9	2814.23	3396.11	3371.15	1805.36	1893.15	2867.65	4	4	6	6	5	5	4	4	5	6	2	5	5	1	5	4	5	4	Q9UP83;Q9UP83-2	Q9UP83;Q9UP83-2	Homo sapiens	COG5_HUMAN	Conserved oligomeric Golgi complex subunit 5;Isoform of Q9UP83, Isoform 2 of Conserved oligomeric Golgi complex subunit 5	COG5
4820.94	4303.68	5596.2	4764.44	4133.88	4847.26	4369.69	4221.08	3705.95	4925.21	4242.31	4701.87	4569	8112.13	5138.97	4583.54	3930.21	5292.3	5	7	7	7	7	7	5	6	5	7	6	7	7	3	7	4	5	7	Q9Y2V7;Q9Y2V7-2	Q9Y2V7;Q9Y2V7-2	Homo sapiens	COG6_HUMAN	Conserved oligomeric Golgi complex subunit 6;Isoform of Q9Y2V7, Isoform 2 of Conserved oligomeric Golgi complex subunit 6	COG6
2801.73	2759.26	3785.34	3315.45	2912.34	2677.1	2952.42	2556.65	2574.88	2867.46	1440.53	2908.9	2913.03	1524.97	2630.85	1839.17	2149.32	2436.22	6	9	11	10	7	6	5	7	4	10	5	9	9	2	9	2	9	6	P83436	P83436	Homo sapiens	COG7_HUMAN	Conserved oligomeric Golgi complex subunit 7	COG7
2102.19	2687.05	2998.16	2773.71	2819.43	3013.58	3421.91	1455.07	1794.91	2968.9	NaN	2910.11	2589.22	NaN	2516.69	1889.37	1705.53	2285.21	3	2	3	3	3	3	3	2	3	3	0	3	2	0	2	2	3	3	A0A087X1T3;B4DYU2;H3BQV3;H3BSH5;Q96MW5	A0A087X1T3;B4DYU2;H3BQV3;H3BSH5;Q96MW5	Homo sapiens	A0A087X1T3_HUMAN;B4DYU2_HUMAN;H3BQV3_HUMAN;H3BSH5_HUMAN;COG8_HUMAN	Isoform of Q96MW5, Conserved oligomeric Golgi complex subunit 8 (Fragment);Isoform of Q96MW5, Conserved oligomeric Golgi complex subunit 8;Isoform of Q96MW5, Conserved oligomeric Golgi complex subunit 8;Isoform of Q96MW5, Conserved oligomeric Golgi complex subunit 8 (Fragment);Conserved oligomeric Golgi complex subunit 8	COG8
877.112	703.869	940.688	1509.04	695.852	745.585	NaN	437.496	615.173	1228.95	NaN	NaN	877.198	NaN	NaN	NaN	NaN	1015.29	1	1	1	1	1	1	0	1	1	1	0	0	1	0	0	0	0	1	P38432	P38432	Homo sapiens	COIL_HUMAN	Coilin	COIL
43161.5	27470.4	36811.5	45954.4	22572.7	30959.7	26747.9	42683.7	12655	35661.4	22456	22196.9	21076.4	17582.8	31036.5	18754.8	60167.2	17220.8	98	85	104	111	87	94	87	99	71	107	70	91	89	41	108	54	105	82	D6RGG3;Q99715	D6RGG3;Q99715	Homo sapiens	D6RGG3_HUMAN;COCA1_HUMAN	Isoform of Q99715, Collagen type XII alpha 1 chain;Collagen alpha-1(XII) chain	COL12A1
8510.14	9114.1	3255.32	6265.52	14464.9	10316.6	13288	5411.15	5320.4	9237.83	9824.88	11931.7	NaN	NaN	6104.02	15461.2	NaN	8810.42	1	1	1	1	1	1	1	1	1	1	1	1	0	0	1	1	0	1	A0A2R8YGI3;A0A669KA03;A0A669KAZ4;A0A669KB16;A0A669KB28;A0A669KB54;A0A669KB55;A0A669KB79;A0A669KBE0;A0A6E1W314;E7ES50;E7EX21;Q5TAT6;Q5TAT6-10;Q5TAT6-11;Q5TAT6-2;Q5TAT6-3;Q5TAT6-4;Q5TAT6-5;Q5TAT6-6;Q5TAT6-7;Q5TAT6-8;Q5TAT6-9	A0A2R8YGI3;A0A669KA03;A0A669KAZ4;A0A669KB16;A0A669KB28;A0A669KB54;A0A669KB55;A0A669KB79;A0A669KBE0;A0A6E1W314;E7ES50;E7EX21;Q5TAT6;Q5TAT6-10;Q5TAT6-11;Q5TAT6-2;Q5TAT6-3;Q5TAT6-4;Q5TAT6-5;Q5TAT6-6;Q5TAT6-7;Q5TAT6-8;Q5TAT6-9	Homo sapiens	A0A2R8YGI3_HUMAN;A0A669KA03_HUMAN;A0A669KAZ4_HUMAN;A0A669KB16_HUMAN;A0A669KB28_HUMAN;A0A669KB54_HUMAN;A0A669KB55_HUMAN;A0A669KB79_HUMAN;A0A669KBE0_HUMAN;A0A6E1W314_HUMAN;E7ES50_HUMAN;E7EX21_HUMAN;CODA1_HUMAN;CODA1_HUMAN;CODA1_HUMAN;CODA1_HUMAN;CODA1_HUMAN;CODA1_HUMAN;CODA1_HUMAN;CODA1_HUMAN;CODA1_HUMAN;CODA1_HUMAN;CODA1_HUMAN	Isoform of Q5TAT6, Collagen type XIII alpha 1 chain;Isoform of Q5TAT6, Collagen type XIII alpha 1 chain;Isoform of Q5TAT6, Collagen type XIII alpha 1 chain;Isoform of Q5TAT6, Collagen type XIII alpha 1 chain;Isoform of Q5TAT6, Collagen type XIII alpha 1 chain;Isoform of Q5TAT6, Collagen type XIII alpha 1 chain;Isoform of Q5TAT6, Collagen type XIII alpha 1 chain;Isoform of Q5TAT6, Collagen type XI…	COL13A1
1965.38	1226.78	813.968	1929.83	NaN	NaN	NaN	1434.03	NaN	930.592	NaN	NaN	NaN	NaN	1895.31	1745.21	NaN	NaN	1	1	1	1	0	0	0	1	0	1	0	0	0	0	1	1	0	0	A6NCT7;Q07092;Q07092-2	A6NCT7;Q07092;Q07092-2	Homo sapiens	A6NCT7_HUMAN;COGA1_HUMAN;COGA1_HUMAN	Isoform of Q07092, Collagen type XVI alpha 1 chain;Collagen alpha-1(XVI) chain;Isoform of Q07092, Isoform 2 of Collagen alpha-1(XVI) chain	COL16A1
4659.13	1193.77	1081.19	1213.49	1039.91	5222.47	4269.19	8608.36	NaN	991.953	2731.75	4440.58	5796.85	4051.9	8584.09	3410.71	10864	849.96	7	1	5	5	2	8	8	11	0	3	3	9	9	2	9	3	11	1	P39060;P39060-1;P39060-2	P39060;P39060-1;P39060-2	Homo sapiens	COIA1_HUMAN	Collagen alpha-1(XVIII) chain;Isoform of P39060, Isoform 2 of Collagen alpha-1(XVIII) chain;Isoform of P39060, Isoform 3 of Collagen alpha-1(XVIII) chain	COL18A1
259317	153810	234155	205464	142985	98927.7	75408.3	140300	93100.5	177367	67288.3	96735.4	78560.6	38592.1	147096	24394.9	114759	37100	85	78	87	88	85	73	64	76	71	86	57	74	76	27	83	29	74	58	P02452	P02452	Homo sapiens	CO1A1_HUMAN	Collagen alpha-1(I) chain	COL1A1
170904	108579	121927	133744	102900	62315.6	55694.8	87564.6	50917.1	114001	48759.1	70815.1	55862.5	20249.1	92898.2	16285.4	75390.5	22106.3	86	84	87	88	85	79	72	81	72	87	63	78	76	30	85	35	79	62	P08123	P08123	Homo sapiens	CO1A2_HUMAN	Collagen alpha-2(I) chain	COL1A2
16310.9	23123.4	10695.1	7928.89	17158.6	29090.6	26776.5	14046.1	23256.8	11046.8	44634.8	30917.9	11171.7	45339.2	19836.6	64575.9	8267.71	36936.6	4	4	4	3	4	4	4	4	4	4	4	4	4	4	4	4	4	4	P02458;P02458-1	P02458;P02458-1	Homo sapiens	CO2A1_HUMAN	Collagen alpha-1(II) chain;Isoform of P02458, Isoform 1 of Collagen alpha-1(II) chain	COL2A1
59197.9	11953.3	43246	36157.1	34348.6	10185.2	12306.7	25125.8	10627	27602.6	11856.6	10906.6	12924.8	25768.2	13195.5	13945.9	24863.4	12169.6	52	28	54	54	49	29	19	39	26	51	13	31	37	6	41	7	37	17	P02461	P02461	Homo sapiens	CO3A1_HUMAN	Collagen alpha-1(III) chain	COL3A1
2800.12	NaN	2804.44	2495.18	NaN	NaN	3925.71	NaN	2551.07	NaN	NaN	NaN	NaN	NaN	1976.64	1033.09	5530.54	NaN	1	0	2	1	0	0	1	0	1	0	0	0	0	0	2	1	2	0	P02462	P02462	Homo sapiens	CO4A1_HUMAN	Collagen alpha-1(IV) chain	COL4A1
4011.44	13054	6913.5	3778.62	2639.43	2549.41	4643.22	5294.52	3733.46	3995.61	2961.72	2967.78	15095.2	1616.62	3938.48	NaN	4289.86	1421.95	1	1	5	3	5	2	3	2	3	4	1	2	1	2	5	0	5	2	P08572	P08572	Homo sapiens	CO4A2_HUMAN	Collagen alpha-2(IV) chain	COL4A2
15185.2	8483.93	13654.2	10449.7	8647.33	4728.73	8396.06	8139.04	4851.55	9859.05	4522.36	7478.53	5640.35	5935.29	7619.43	2911.38	5844.69	3392.13	21	20	21	21	20	16	15	18	16	20	11	18	18	8	21	5	17	13	P20908	P20908	Homo sapiens	CO5A1_HUMAN	Collagen alpha-1(V) chain	COL5A1
7158.44	3312.59	6098.68	5940.65	3875.95	2461.62	3111.9	4062.13	1748.81	4636.87	1999.51	2943.31	2444.55	11.1524	3863.02	NaN	4042.2	NaN	12	10	12	12	10	6	4	10	4	11	3	8	6	1	11	0	8	0	P05997	P05997	Homo sapiens	CO5A2_HUMAN	Collagen alpha-2(V) chain	COL5A2
147155	58125.5	129739	144592	89200	79753	125458	83742.4	70494.1	102121	49197.7	85894.7	135640	64651.4	94735	39731	100931	32951.7	46	42	52	51	46	44	47	42	41	51	35	44	51	32	47	34	43	40	P12109	P12109	Homo sapiens	CO6A1_HUMAN	Collagen alpha-1(VI) chain	COL6A1
161373	66331	141604	182851	119506	103913	125902	129321	87481	152386	79153.1	102794	150754	69391.8	105504	82662.4	106262	51094.9	44	33	49	50	46	43	41	45	38	49	32	43	46	25	43	28	41	34	P12110	P12110	Homo sapiens	CO6A2_HUMAN	Collagen alpha-2(VI) chain	COL6A2
126594	53330.8	100691	121667	83557.8	87162.3	82064.1	136030	89098.1	158244	48977.3	107533	98014.5	97904.2	108813	49341.9	81952.3	55434.4	197	154	203	207	188	182	167	199	181	208	146	192	201	140	194	121	183	170	P12111	P12111	Homo sapiens	CO6A3_HUMAN	Collagen alpha-3(VI) chain	COL6A3
1711.41	NaN	NaN	230.814	NaN	311.049	4392.13	NaN	NaN	426.07	NaN	2718.08	1830.66	NaN	1135.49	2639.03	NaN	592.853	2	0	0	2	0	2	1	0	0	1	0	2	2	0	2	1	0	1	Q02388;Q02388-2	Q02388;Q02388-2	Homo sapiens	CO7A1_HUMAN	Collagen alpha-1(VII) chain;Isoform of Q02388, Isoform 2 of Collagen alpha-1(VII) chain	COL7A1
2579.62	1325.68	2349.05	2219.36	6257.94	1276.26	6635.11	6530.3	NaN	1472.16	4003.86	3492.68	7002.18	NaN	2315.27	4172.1	NaN	1243.54	2	3	3	3	3	1	2	2	0	2	2	3	3	0	3	2	0	2	P27658	P27658	Homo sapiens	CO8A1_HUMAN	Collagen alpha-1(VIII) chain	COL8A1
3725.59	3237.23	1952.63	6230.67	5529.05	1043.55	3466.49	3773.21	3992.88	3999.27	4108.13	2508.94	6661.96	1812.56	3549.79	4361.03	1308.34	3358.01	13	11	11	12	12	5	11	11	10	12	10	9	14	3	10	6	7	9	Q5KU26	Q5KU26	Homo sapiens	COL12_HUMAN	Collectin-12	COLEC12
81460	64183.1	75996	53259.9	65707.3	60914.4	75884.4	52570.7	56661.6	75715.9	58115.4	66473.7	48141.7	46592.8	51402.7	43667.6	49920.2	54058.8	21	20	26	25	20	21	21	20	23	25	21	25	25	18	24	18	21	21	Q8NBJ5	Q8NBJ5	Homo sapiens	GT251_HUMAN	Procollagen galactosyltransferase 1	COLGALT1
4952.26	5732.28	6085.04	5922.45	4808.46	6052.72	4655.35	5662.69	3465.86	6245.15	5120.52	3979.76	5169.14	3820.06	4081.99	6139.32	6159.56	4397.03	5	4	4	4	4	4	3	5	5	5	4	4	4	2	4	2	5	5	Q8N668;Q8N668-2	Q8N668;Q8N668-2	Homo sapiens	COMD1_HUMAN	COMM domain-containing protein 1;Isoform of Q8N668, Isoform 2 of COMM domain-containing protein 1	COMMD1
5097.97	5336.78	5673.17	5760.97	4500.52	5880.67	4793.13	5141.9	5014.15	4159.7	5571.5	4318.16	4691.08	5861.63	4199.26	6610.6	4821.84	4540.17	5	4	5	5	5	5	4	4	5	5	4	5	5	4	5	5	5	5	D6RJ90;Q9Y6G5	D6RJ90;Q9Y6G5	Homo sapiens	D6RJ90_HUMAN;COMDA_HUMAN	Isoform of Q9Y6G5, COMM domain containing 10;COMM domain-containing protein 10	COMMD10
11330.1	8084.57	9955.24	12477.6	8187.88	9661.72	7619.85	9428.99	10182.4	7816.78	10316.4	6698.05	8926.74	6946.95	7275.65	11246.7	9979.95	8792.56	6	6	6	6	5	6	5	6	6	6	6	6	6	4	6	3	6	6	Q86X83	Q86X83	Homo sapiens	COMD2_HUMAN	COMM domain-containing protein 2	COMMD2
16155.3	15647.7	16310.5	20123.5	18950.4	20268.1	17355.7	16592.4	9546.33	17166.8	11939.2	20391.4	15932.4	18579.7	17630.6	19015	17745.3	21122.9	1	1	1	1	1	1	1	1	1	1	1	1	1	1	1	1	1	1	Q9UBI1	Q9UBI1	Homo sapiens	COMD3_HUMAN	COMM domain-containing protein 3	COMMD3
15752.4	12006.8	13834.5	13445.8	14313.7	8996.77	9374.93	11703.4	11680.9	10727.3	11993.3	10944.1	10331.7	8412.29	11171.7	8749.19	9302.2	10509.8	4	3	5	5	5	4	5	5	5	6	4	5	6	3	5	4	5	4	R4GMX3	R4GMX3	Homo sapiens	R4GMX3_HUMAN	COMMD3-BMI1 readthrough, COMMD3-BMI1 readthrough	COMMD3-BMI1
7997.22	6700.86	8016.64	7659.51	6661.13	8132	6596.84	7137.49	9021.77	7127.26	9063.63	5681.57	7631.03	6637.6	6627.34	10097.6	8779.95	6738.27	4	5	5	5	5	5	4	5	5	5	4	4	5	4	5	4	5	5	Q9H0A8	Q9H0A8	Homo sapiens	COMD4_HUMAN	COMM domain-containing protein 4	COMMD4
4180.23	3116.85	2824.03	4993.79	5047.41	3132.3	3968.91	2037.11	2105.65	3926.75	3388.78	3647.9	4453.85	NaN	1332.79	2269.88	2897.47	3258.33	5	3	4	5	4	5	3	4	3	5	4	4	4	0	4	1	1	5	Q9GZQ3	Q9GZQ3	Homo sapiens	COMD5_HUMAN	COMM domain-containing protein 5	COMMD5
4882.15	4259.06	4081.29	3621.22	4685.55	4310.26	3635.7	4089.29	4669.15	2780.14	3408.61	2643.98	2702.42	4491.28	3714.07	4641.06	2278.33	2979.44	3	2	3	3	3	3	2	2	3	3	2	3	3	3	3	2	2	3	A0A2R8Y455;A0A2R8Y600;A0A2R8Y620;A0A2R8Y7U2;Q86VX2;Q86VX2-2	A0A2R8Y455;A0A2R8Y600;A0A2R8Y620;A0A2R8Y7U2;Q86VX2;Q86VX2-2	Homo sapiens	A0A2R8Y455_HUMAN;A0A2R8Y600_HUMAN;A0A2R8Y620_HUMAN;A0A2R8Y7U2_HUMAN;COMD7_HUMAN;COMD7_HUMAN	readthrough, COMM domain-containing protein;readthrough, COMM domain-containing protein;readthrough, COMM domain-containing protein;readthrough, COMM domain-containing protein;COMM domain-containing protein 7;Isoform of Q86VX2, Isoform 2 of COMM domain-containing protein 7	COMMD7
4374.38	3391.15	5585.83	5328.7	3994.65	5008.37	4134.2	4550.88	4909.67	4620.93	3774.33	3981.77	2801.84	3455	3346.85	3898.41	4767	3145.02	6	6	6	6	6	6	5	6	6	6	4	4	6	3	6	5	5	6	Q9NX08	Q9NX08	Homo sapiens	COMD8_HUMAN	COMM domain-containing protein 8	COMMD8
6972.47	10884.6	9903.41	10120.6	8674.55	9605.47	10792.1	7851.69	12239.5	9574.4	10489	7066.44	8302.44	15003	8275.2	11174.7	7024.96	8118.16	5	5	4	5	5	5	4	5	5	4	4	5	4	3	6	4	5	5	Q9P000;Q9P000-2	Q9P000;Q9P000-2	Homo sapiens	COMD9_HUMAN	COMM domain-containing protein 9;Isoform of Q9P000, Isoform 2 of COMM domain-containing protein 9	COMMD9
6780.76	3539.12	873.761	1953.19	5255.46	2896.83	7697.75	3662.54	3152.79	816.193	14185	5421.14	2162.08	27260.8	2383.01	19242.5	3217.09	6436.34	2	2	1	3	2	3	3	3	3	1	3	3	2	3	3	3	1	3	G3XAP6;P49747;P49747-2	G3XAP6;P49747;P49747-2	Homo sapiens	G3XAP6_HUMAN;COMP_HUMAN;COMP_HUMAN	Isoform of P49747, Cartilage oligomeric matrix protein;Cartilage oligomeric matrix protein;Isoform of P49747, Isoform 2 of Cartilage oligomeric matrix protein	COMP
51419.4	57043.8	41668	39687.3	40535.2	50614.3	55993.3	36837.6	45697.9	48268.5	46760.6	46403.1	37424.2	28547.7	41401.4	58859.2	62717.9	36402.5	7	8	12	13	6	10	5	9	10	13	7	11	12	7	13	5	12	10	P21964;P21964-2	P21964;P21964-2	Homo sapiens	COMT_HUMAN	Catechol O-methyltransferase;Isoform of P21964, Isoform Soluble of Catechol O-methyltransferase	COMT
126098	126314	133322	120872	119694	118505	128283	113182	118342	124718	102471	117903	114328	106686	124046	100980	102937	104267	65	57	71	70	63	64	64	65	62	72	60	67	67	50	69	51	63	62	P53621;P53621-2	P53621;P53621-2	Homo sapiens	COPA_HUMAN	Coatomer subunit alpha;Isoform of P53621, Isoform 2 of Coatomer subunit alpha	COPA
122806	130086	151440	141253	119771	134383	132469	121585	123296	131726	114507	128824	114013	141472	121852	108498	111307	128847	40	40	47	49	45	41	40	43	45	47	35	45	46	29	45	29	42	44	P53618	P53618	Homo sapiens	COPB_HUMAN	Coatomer subunit beta	COPB1
77052	79303.3	85977.4	78591.1	78484.3	82919.4	86316	73788.4	76710.9	81723.6	70785.4	78744.7	69316.4	78362.7	76861	66304.3	71732.7	69556.7	42	42	51	50	41	45	44	44	44	50	39	46	45	31	51	33	42	44	H0Y938;H0YAC7;P35606;P35606-2	H0Y938;H0YAC7;P35606;P35606-2	Homo sapiens	H0Y938_HUMAN;H0YAC7_HUMAN;COPB2_HUMAN;COPB2_HUMAN	Isoform of P35606, Coatomer subunit beta';Isoform of P35606, Coatomer subunit beta';Coatomer subunit beta';Isoform of P35606, Isoform 2 of Coatomer subunit beta'	COPB2
29372.5	28399.2	33188.6	33085.2	30157.7	29159.9	29326.4	29311.7	26503.6	30775.8	27706.4	30173.9	28093.1	29751.1	31118.1	28175.7	29141.4	34255.1	20	19	24	23	22	22	21	22	19	23	18	22	23	15	24	15	20	21	O14579	O14579	Homo sapiens	COPE_HUMAN	Coatomer subunit epsilon	COPE
51794.8	60572.9	60264.3	49951.8	49357.9	55538.2	50977.2	49541.7	49558.3	54537.4	52850.1	57167.5	45137.4	56953.1	52759.1	51526.7	43732.7	51054.3	44	43	44	45	46	44	45	45	45	48	39	45	46	30	45	38	47	41	Q9Y678	Q9Y678	Homo sapiens	COPG1_HUMAN	Coatomer subunit gamma-1	COPG1
13718.3	11618.4	15081.1	18254.7	18946.9	15644.1	14363.8	16925	15474.4	15524	10708.6	15555.4	20023.6	9451.64	19564.3	8071.79	15117.4	14179.9	18	16	19	19	16	18	16	16	17	18	14	18	18	8	18	7	19	18	Q9UBF2	Q9UBF2	Homo sapiens	COPG2_HUMAN	Coatomer subunit gamma-2	COPG2
17282.6	17087.4	19489.9	18866.9	17131.4	17890.9	14399.6	17945.1	18210.9	19506.2	17552.5	15975.5	19291.8	19166.5	18096	18362.9	14446	18360.6	26	27	28	27	26	27	25	26	26	28	25	28	26	18	27	21	28	26	P61201	P61201	Homo sapiens	CSN2_HUMAN	COP9 signalosome complex subunit 2	COPS2
9188.91	7974.14	9221.41	10010.4	7831.13	8740.07	6329.89	8810.65	9418.23	9473.32	7620.29	6453.81	9368.71	8128.93	8680.48	7025.99	7698.82	8916.75	11	13	15	16	12	15	11	12	14	16	11	14	15	11	14	9	16	15	Q9UNS2	Q9UNS2	Homo sapiens	CSN3_HUMAN	COP9 signalosome complex subunit 3	COPS3
46963.8	45759.2	45631.8	46005	42955.4	46273.6	42154.6	45909.7	42538.7	49022.1	41357.3	42502.7	49731.2	47450	48909.5	44201.3	42062.5	42303.5	25	25	25	27	25	25	21	26	22	26	21	26	25	20	26	21	24	24	Q9BT78	Q9BT78	Homo sapiens	CSN4_HUMAN	COP9 signalosome complex subunit 4	COPS4
10099.3	11238.9	11171.1	11781	9953.85	12465.5	8182.79	10442.4	11264.8	10771.4	10675.7	8220.12	10972.4	10360.6	11283.7	11265.1	9298.63	10971.5	10	11	12	12	10	11	11	12	11	12	8	9	12	8	12	7	9	9	Q92905	Q92905	Homo sapiens	CSN5_HUMAN	COP9 signalosome complex subunit 5	COPS5
9504.17	9375.77	10636.3	10321.4	9649.08	12196	10547.3	10972.4	10620.2	10083	9643.6	8753.04	11666.4	8977.9	11688.1	10103	9446.55	10344.4	9	9	12	11	8	10	11	10	9	11	7	9	11	7	11	8	7	8	E7EM64;Q7L5N1	E7EM64;Q7L5N1	Homo sapiens	E7EM64_HUMAN;CSN6_HUMAN	Isoform of Q7L5N1, COP9 signalosome complex subunit 6;COP9 signalosome complex subunit 6	COPS6
15990.3	14133.2	17522.5	18351.7	14948.8	13347.6	12823.9	12592.8	13109.6	16082.4	14284	15497.2	17839.2	15030.2	17022.7	15540.9	15824.3	15802.6	11	12	12	12	12	12	11	12	12	12	10	12	12	6	12	11	12	11	Q9UBW8	Q9UBW8	Homo sapiens	CSN7A_HUMAN	COP9 signalosome complex subunit 7a	COPS7A
2466.61	4041.47	3499.43	4272.68	3567.2	3427.63	2893.75	3755.14	3898.61	4093.17	2072.21	3184.56	4300.75	3775.98	4278.02	2702.29	3191.88	3575.49	3	3	4	4	4	3	3	3	2	4	3	4	4	2	3	2	4	2	J3KQ34;Q9H9Q2	J3KQ34;Q9H9Q2	Homo sapiens	J3KQ34_HUMAN;CSN7B_HUMAN	Isoform of Q9H9Q2, COP9 signalosome subunit 7B;COP9 signalosome complex subunit 7b	COPS7B
19965.7	20239.6	15999.4	17009.4	20610.3	21266	17275	18632.4	18438.4	14450.8	16994.5	18260	15220.7	13962.1	19057.2	8387.96	12198.8	13686.1	3	3	4	5	4	2	4	4	2	5	3	5	5	2	5	2	5	2	E9PGT6;Q99627;Q99627-2	E9PGT6;Q99627;Q99627-2	Homo sapiens	E9PGT6_HUMAN;CSN8_HUMAN;CSN8_HUMAN	Isoform of Q99627, COP9 signalosome subunit 8;COP9 signalosome complex subunit 8;Isoform of Q99627, Isoform 2 of COP9 signalosome complex subunit 8	COPS8
47605.8	52112.1	61622.2	60884.2	63418.4	54569.4	50987.3	54618.7	57864.8	54708.3	45717.1	66617.4	53790.7	61793.9	50715.5	54298.1	41879.6	53480.6	8	6	7	6	8	6	5	6	6	6	6	7	7	7	6	7	7	8	F8VVA7;P61923;P61923-4	F8VVA7;P61923;P61923-4	Homo sapiens	F8VVA7_HUMAN;COPZ1_HUMAN;COPZ1_HUMAN	Isoform of P61923, Coatomer subunit zeta;Coatomer subunit zeta-1;Isoform of P61923, Isoform 4 of Coatomer subunit zeta-1	COPZ1
11176	11306.5	11679.3	12022.4	9876.92	9220.38	8352.99	8405.67	11590.1	9253.81	10579.8	10982.6	9170.37	5575.12	11241.5	7702.15	10043.5	10171.2	7	8	8	8	7	7	7	8	6	8	5	7	8	2	8	3	8	7	Q9P299	Q9P299	Homo sapiens	COPZ2_HUMAN	Coatomer subunit zeta-2	COPZ2
1077.59	246.423	903.014	1444.42	946.704	2620.43	2190.58	1185.79	NaN	2536.11	NaN	822.145	3319.13	NaN	NaN	1955.64	937.095	NaN	1	1	2	2	1	1	1	1	0	2	0	1	2	0	0	1	1	0	Q9Y2Z9;Q9Y2Z9-3	Q9Y2Z9;Q9Y2Z9-3	Homo sapiens	COQ6_HUMAN	Ubiquinone biosynthesis monooxygenase COQ6, mitochondrial;Isoform of Q9Y2Z9, Isoform 3 of Ubiquinone biosynthesis monooxygenase COQ6, mitochondrial	COQ6
1012.44	1023.44	1102.62	1015.38	NaN	429.235	1088.37	594.685	NaN	930.011	NaN	NaN	1552.89	NaN	404.78	NaN	696.602	NaN	1	1	1	1	0	1	1	1	0	1	0	0	1	0	1	0	1	0	H3BNT2;H3BPC6;H3BPW3;H3BRC0;H3BSJ5;H3BVA5;O75208;O75208-2	H3BNT2;H3BPC6;H3BPW3;H3BRC0;H3BSJ5;H3BVA5;O75208;O75208-2	Homo sapiens	H3BNT2_HUMAN;H3BPC6_HUMAN;H3BPW3_HUMAN;H3BRC0_HUMAN;H3BSJ5_HUMAN;H3BVA5_HUMAN;COQ9_HUMAN;COQ9_HUMAN	Isoform of O75208, Ubiquinone biosynthesis protein (Fragment);Isoform of O75208, Ubiquinone biosynthesis protein;Isoform of O75208, Ubiquinone biosynthesis protein (Fragment);Isoform of O75208, Ubiquinone biosynthesis protein;Isoform of O75208, Ubiquinone biosynthesis protein;Isoform of O75208, Ubiquinone biosynthesis protein (Fragment);Ubiquinone biosynthesis protein COQ9, mitochondrial;Isoform …	COQ9
43719.9	48204.5	49080.4	52948.1	38939.2	56778.5	49676.1	48744.9	40432.4	42822.9	57470.7	46802.2	42892.4	45316.4	42146.5	79882.5	66710.1	37111.1	17	17	20	18	17	18	15	19	18	20	17	18	20	12	18	16	19	17	Q9BR76	Q9BR76	Homo sapiens	COR1B_HUMAN	Coronin-1B	CORO1B
96378.4	102081	91566.3	108611	106724	133282	118142	113049	120211	62588.8	134213	98600.4	88900.2	128127	73962.3	188506	88707.9	112620	16	18	27	28	15	23	18	24	25	26	15	16	24	16	21	13	23	22	Q9ULV4;Q9ULV4-2;Q9ULV4-3	Q9ULV4;Q9ULV4-2;Q9ULV4-3	Homo sapiens	COR1C_HUMAN	Coronin-1C;Isoform of Q9ULV4, Isoform 2 of Coronin-1C;Isoform of Q9ULV4, Isoform 3 of Coronin-1C	CORO1C
3425.84	3713.06	1507.85	3761.29	1827.11	3132.4	2770.81	6000.83	2826.62	3057.44	6045.88	4423.38	2299.69	6144.91	2595.2	4954.22	2294.41	3955.27	2	2	2	2	2	2	1	2	1	2	2	2	2	1	2	2	2	2	A0A0A6YYL4;P57737;P57737-2;P57737-3;P57737-4	A0A0A6YYL4;P57737;P57737-2;P57737-3;P57737-4	Homo sapiens	A0A0A6YYL4_HUMAN;CORO7_HUMAN;CORO7_HUMAN;CORO7_HUMAN;CORO7_HUMAN	Isoform of Q9Y3D7, Coronin;Coronin-7;Isoform of P57737, Isoform 2 of Coronin-7;Isoform of P57737, Isoform 3 of Coronin-7;Isoform of P57737, Isoform 4 of Coronin-7	CORO7-PAM16
118674	127068	124252	105737	113876	123689	116516	123359	87857.9	84052.8	123859	86206.9	138831	151486	112808	165343	99067.4	89845	14	13	16	16	15	16	16	16	15	15	13	15	15	13	16	13	14	13	Q14019	Q14019	Homo sapiens	COTL1_HUMAN	Coactosin-like protein	COTL1
589.345	NaN	NaN	NaN	2118.48	1180.58	659.719	1369.81	2210.16	NaN	NaN	NaN	NaN	NaN	3547.04	NaN	NaN	NaN	1	0	0	0	1	1	1	1	1	0	0	0	0	0	1	0	0	0	Q96I36	Q96I36	Homo sapiens	COX14_HUMAN	Cytochrome c oxidase assembly protein COX14	COX14
NaN	NaN	378.904	597.126	NaN	NaN	NaN	NaN	NaN	559.316	NaN	NaN	570.806	NaN	NaN	NaN	1127.06	NaN	0	0	1	1	0	0	0	0	0	1	0	0	1	0	0	0	1	0	Q7KZN9;Q7KZN9-2	Q7KZN9;Q7KZN9-2	Homo sapiens	COX15_HUMAN	Cytochrome c oxidase assembly protein COX15 homolog;Isoform of Q7KZN9, Isoform 2 of Cytochrome c oxidase assembly protein COX15 homolog	COX15
36569.2	25757.8	44116.9	35154	44150	33287	26666.1	35619.7	31077.7	34363.7	32864.3	33020.8	30422.4	44169.5	34298.8	43408.4	29185	33681.6	1	1	1	1	1	1	1	1	1	1	1	1	1	1	1	1	1	1	C9J8T6;Q14061	C9J8T6;Q14061	Homo sapiens	C9J8T6_HUMAN;COX17_HUMAN	Isoform of Q14061, Cytochrome c oxidase copper chaperone COX17;Cytochrome c oxidase copper chaperone	COX17
2825.31	2688.41	2270.99	2905.61	2369.5	2009.81	2062.96	1002.3	2511.82	3165.21	1948.83	2313.05	3282.31	NaN	2823.15	1549.64	1050.49	1441.64	1	1	1	1	1	1	1	1	1	1	1	1	1	0	1	1	1	1	Q49B96	Q49B96	Homo sapiens	COX19_HUMAN	Cytochrome c oxidase assembly protein COX19	COX19
8491.06	8963.7	11267.1	9344.11	15758	10915.9	14319.1	13886.5	15038	11400.4	8859.82	15895.3	18110.3	11556.4	16573.1	14171.1	10959.7	9945.07	7	7	7	7	7	7	7	7	6	7	7	6	7	6	7	6	7	7	Q5RI15;Q5RI15-2	Q5RI15;Q5RI15-2	Homo sapiens	COX20_HUMAN	Cytochrome c oxidase assembly protein COX20, mitochondrial;Isoform of Q5RI15, Isoform 2 of Cytochrome c oxidase assembly protein COX20, mitochondrial	COX20
13172.5	29628.6	15223.4	15180.2	35126.6	38668.9	52151.1	36356.8	46325.7	13907.9	37914.2	41468.9	15959.7	47596.8	38109.8	47420.6	18418.9	29644.3	10	9	8	9	9	9	11	10	11	8	9	9	9	9	11	9	8	10	P13073	P13073	Homo sapiens	COX41_HUMAN	Cytochrome c oxidase subunit 4 isoform 1, mitochondrial	COX4I1
22992	37073.8	25694.7	21866.2	49631.4	42800.2	58812.1	50626.2	49466	18679	45262.7	55687.7	23315.4	41443	46453.2	57188.7	25335.5	40673.3	5	4	4	4	5	4	5	4	5	5	4	5	4	4	4	4	4	5	P20674	P20674	Homo sapiens	COX5A_HUMAN	Cytochrome c oxidase subunit 5A, mitochondrial	COX5A
26575.4	41568.3	26622.5	26816.9	50130.8	43495.8	66695	53358.6	52614.5	18360.6	44751.2	53359.1	24936.4	43681.5	51352.7	57869.2	24526.4	33972.5	8	8	8	8	8	8	8	8	8	8	8	8	8	7	8	8	8	8	P10606	P10606	Homo sapiens	COX5B_HUMAN	Cytochrome c oxidase subunit 5B, mitochondrial	COX5B
3611.35	4471.8	2429.7	2670.08	6894.64	4083.17	9843.82	4752.87	5160.49	NaN	3929.39	7392.2	NaN	6877.65	5685.64	6867.24	2460.28	3573.03	1	1	1	1	1	1	1	1	1	0	1	1	0	1	1	1	1	1	A0A494C160;K7EQD3;P14854	A0A494C160;K7EQD3;P14854	Homo sapiens	A0A494C160_HUMAN;K7EQD3_HUMAN;CX6B1_HUMAN	Isoform of P14854, Cytochrome c oxidase subunit 6B1 (Fragment);Isoform of P14854, Cytochrome c oxidase subunit 6B1 (Fragment);Cytochrome c oxidase subunit 6B1	COX6B1
3941.78	9544.32	4419.29	3066.41	13004.2	12397.7	19172.7	16106	15781.4	3105.94	11366.8	13292.2	4819.88	10003.9	15208.7	14608.2	3597.13	6666.58	4	5	4	5	5	5	5	4	5	4	5	5	4	4	5	4	3	5	P09669	P09669	Homo sapiens	COX6C_HUMAN	Cytochrome c oxidase subunit 6C	COX6C
8452.84	29942.5	11983.8	9182.13	29313.2	29312.2	41568.6	40176.7	43672.8	6992.27	33656.9	30783.7	8082.3	52068.2	29176.8	47271	8885.99	18698.3	2	2	2	2	2	2	2	2	2	2	2	2	2	2	2	2	2	2	D6RGV5;D6RIE3;H0UI06;P14406	D6RGV5;D6RIE3;H0UI06;P14406	Homo sapiens	D6RGV5_HUMAN;D6RIE3_HUMAN;H0UI06_HUMAN;CX7A2_HUMAN	Isoform of P14406, Cytochrome c oxidase subunit 7A2 (Fragment);Isoform of P14406, Cytochrome c oxidase subunit 7A2;Isoform of P14406, Cytochrome c oxidase subunit 7A2;Cytochrome c oxidase subunit 7A2, mitochondrial	COX7A2
NaN	2701.76	1365.54	1050.88	3779.56	4677.13	2638.02	3240.49	3008.1	NaN	2882.51	5040.86	NaN	5428.86	3897.96	4713.3	1499.05	3084.73	0	1	1	1	1	1	1	1	1	0	1	1	0	1	1	1	1	1	E5RJZ1;H0YBD2;O14548	E5RJZ1;H0YBD2;O14548	Homo sapiens	E5RJZ1_HUMAN;H0YBD2_HUMAN;COX7R_HUMAN	Isoform of O14548, Cytochrome c oxidase subunit 7A2 like;Isoform of O14548, Cytochrome c oxidase subunit 7A2 like (Fragment);Cytochrome c oxidase subunit 7A-related protein, mitochondrial	COX7A2L
2342.84	3274.37	1725.57	2003.46	4278.05	3250.83	4865.13	4460.91	3949.33	1085.53	4219.6	3837.12	2644.07	5317.03	3111.64	3528.53	1565.14	2079.43	3	3	3	3	3	3	3	3	3	3	2	3	3	2	3	3	2	3	A0A3B3IRN8;A0A3B3ITX0;P24311	A0A3B3IRN8;A0A3B3ITX0;P24311	Homo sapiens	A0A3B3IRN8_HUMAN;A0A3B3ITX0_HUMAN;COX7B_HUMAN	Isoform of P24311, Cytochrome c oxidase subunit 7B;Isoform of P24311, Cytochrome c oxidase subunit 7B;Cytochrome c oxidase subunit 7B, mitochondrial	COX7B
1212.4	3892.34	2739.29	2151.89	2975	2127.09	5964.97	3409.92	4138.61	1594.33	3745.37	4630.88	1652.66	10613.9	5108.6	4145.83	NaN	2647.99	1	1	1	1	1	1	1	1	1	1	1	1	1	1	1	1	0	1	D6R9Z7;P15954	D6R9Z7;P15954	Homo sapiens	D6R9Z7_HUMAN;COX7C_HUMAN	Isoform of P15954, Cytochrome c oxidase subunit 7C, mitochondrial;Cytochrome c oxidase subunit 7C, mitochondrial	COX7C
NaN	1585.01	NaN	NaN	NaN	NaN	2130.55	NaN	NaN	NaN	3588.22	1618.64	NaN	16431.2	NaN	5914.11	NaN	2468.38	0	1	0	0	0	0	1	0	0	0	1	1	0	3	0	2	0	1	P00450	P00450	Homo sapiens	CERU_HUMAN	Ceruloplasmin	CP
7625.79	23352.1	7373.84	5322.83	16870.2	35442.4	55992.5	21227.5	28076.1	9938.02	89405	25270.4	8476.51	93013.7	18653.6	64715.7	15764.1	30026.7	1	1	1	1	1	1	1	1	1	1	1	1	1	1	1	1	1	1	C9JUF9;P15085;P15086	C9JUF9;P15085;P15086	Homo sapiens	C9JUF9_HUMAN;CBPA1_HUMAN;CBPB1_HUMAN	Isoform of P15085, Carboxypeptidase A1;Carboxypeptidase A1;Carboxypeptidase B	CPA1
5045.36	17504.2	4369.44	3102.07	14770.6	20604.7	40484.4	14388.8	15692.2	4573.22	83376.4	16533.6	4878.14	81411.4	13717.1	60476.9	9252.8	25536.5	1	1	1	1	1	1	1	1	1	1	2	1	1	2	1	2	1	1	A0A087WSY5;A0A6Q8PG06;A0A6Q8PHS9;Q96IY4;Q96IY4-2	A0A087WSY5;A0A6Q8PG06;A0A6Q8PHS9;Q96IY4;Q96IY4-2	Homo sapiens	A0A087WSY5_HUMAN;A0A6Q8PG06_HUMAN;A0A6Q8PHS9_HUMAN;CBPB2_HUMAN;CBPB2_HUMAN	Isoform of Q96IY4, Carboxypeptidase B2;Isoform of Q96IY4, Carboxypeptidase B2;Isoform of Q96IY4, Carboxypeptidase B2;Carboxypeptidase B2;Isoform of Q96IY4, Isoform 2 of Carboxypeptidase B2	CPB2
11967.4	13988.4	7358.21	13188.9	11970.8	10883.7	12933.7	10335.3	12056.5	13401.4	9546.88	12078.4	11926.5	7386.35	12304.7	7214.23	14263.7	6212.88	22	22	21	25	22	23	18	21	21	25	15	23	22	9	24	9	21	13	O75976	O75976	Homo sapiens	CBPD_HUMAN	Carboxypeptidase D	CPD
543.797	1790.77	94.2753	471.96	1788.87	874.24	3782.74	4786.34	1967.83	372.085	20455.9	579.747	NaN	8450.33	926.028	15832.6	1217.98	2275.52	1	1	1	1	1	1	1	1	1	1	1	1	0	1	1	1	1	1	P15169	P15169	Homo sapiens	CBPN_HUMAN	Carboxypeptidase N catalytic chain	CPN1
22439.5	53812.6	20868.1	23639.6	42992.8	54706.2	62380.3	48531.3	38119	45484.1	72534.4	50961.1	25646	63159	51976.5	28826.1	43537.2	45634.1	11	10	9	11	10	10	12	10	11	11	10	10	8	8	13	9	10	10	B0QZ18;Q99829	B0QZ18;Q99829	Homo sapiens	B0QZ18_HUMAN;CPNE1_HUMAN	Isoform of Q99829, Copine 1;Copine-1	CPNE1
16251.8	10317.7	NaN	NaN	25266.4	NaN	NaN	12454.7	15635.2	NaN	14253.3	NaN	15438.2	24289.9	25344.5	12342.1	17727.5	NaN	2	2	0	0	2	0	0	2	2	0	2	0	2	2	2	2	2	0	Q96FN4	Q96FN4	Homo sapiens	CPNE2_HUMAN	Copine-2	CPNE2
30106.3	45499.2	34210.5	42073.8	34948.3	51836.3	83801.6	28788.9	48439	42180.4	61847.6	50298.7	36635.9	64353.8	40829	54942.5	43167.7	40339	14	14	20	20	15	19	17	16	20	21	15	19	18	12	19	14	16	15	O75131	O75131	Homo sapiens	CPNE3_HUMAN	Copine-3	CPNE3
525.989	NaN	2151.51	1340.02	NaN	1508.24	2893.63	1844.22	736.026	NaN	1827.27	1603.86	1072.92	NaN	2087.64	2924.01	1518.46	496.434	1	0	1	1	0	1	1	1	1	0	1	1	1	0	1	1	1	1	A0A0J9YWA1;E7ENV7;Q86YQ8;Q8IYJ1;Q9HCH3	A0A0J9YWA1;E7ENV7;Q86YQ8;Q8IYJ1;Q9HCH3	Homo sapiens	A0A0J9YWA1_HUMAN;E7ENV7_HUMAN;CPNE8_HUMAN;CPNE9_HUMAN;CPNE5_HUMAN	Isoform of Q9HCH3, Copine 5;Isoform of Q86YQ8, Copine 8;Copine-8;Copine-9;Copine-5	CPNE5
NaN	NaN	NaN	NaN	NaN	542.598	1356.18	866.018	NaN	2012.33	358.84	557.465	1920.59	NaN	1934.99	NaN	4241.66	825.158	0	0	0	0	0	1	1	1	0	1	1	2	1	0	1	0	2	1	Q9UBL6;Q9UBL6-2	Q9UBL6;Q9UBL6-2	Homo sapiens	CPNE7_HUMAN	Copine-7;Isoform of Q9UBL6, Isoform 2 of Copine-7	CPNE7
18480.2	17360.7	17115.1	17277.7	19995.5	17973.8	18256.6	15450.4	13639.9	17983.3	17301.3	13775	18728.8	19179.9	16825.1	21950.3	14961.2	14176.8	12	13	13	12	12	13	13	12	11	13	12	12	11	9	13	12	11	13	P36551	P36551	Homo sapiens	HEM6_HUMAN	Oxygen-dependent coproporphyrinogen-III oxidase, mitochondrial	CPOX
61926.4	65443.5	48226.2	53415.4	49426.8	53204.9	74640.4	90101.9	63576.5	55781.8	69817.6	85769	60214.1	73679.9	45392.8	124104	90399.9	55244.1	12	11	12	13	11	10	12	12	12	13	11	11	13	11	12	12	12	11	Q9BRF8	Q9BRF8	Homo sapiens	CPPED_HUMAN	Serine/threonine-protein phosphatase CPPED1	CPPED1
10579.7	5922.32	11106.7	10500.8	8961.67	8523.8	14221.8	5170.85	6210.82	3607.41	8592.53	9637.48	4590.49	5817.38	4766.48	16804.6	7394.9	9763.52	3	3	3	3	3	3	3	2	3	2	2	3	2	2	3	3	3	3	Q9Y646	Q9Y646	Homo sapiens	CBPQ_HUMAN	Carboxypeptidase Q	CPQ
35088.8	88968.2	61511	48031.6	80699.2	107047	215958	79758.7	111424	56387.8	143875	114792	65663.9	341141	41600	143101	78504.9	59886.1	1	2	3	3	2	1	1	3	2	3	2	2	3	1	3	3	3	2	A0A669KBF2	A0A669KBF2	Homo sapiens	A0A669KBF2_HUMAN	Isoform of P31327, Carbamoyl-phosphate synthase 1 (Fragment)	CPS1
6453.83	5632.19	5664.2	5623.14	6211.05	6446.24	2090.01	6370.87	5587.95	6058.5	4294.72	7400.9	7487.88	8338.48	7254.14	4783.67	1624.8	7056.15	6	6	6	6	6	6	4	6	6	6	6	6	6	5	6	2	2	6	Q10570	Q10570	Homo sapiens	CPSF1_HUMAN	Cleavage and polyadenylation specificity factor subunit 1	CPSF1
3316.47	1110.05	1606.81	1796.13	1986.46	1933.61	NaN	2006.78	1929.36	1976.52	433.648	2799.62	1801.83	2313.77	2669.18	2191.02	NaN	1869.51	3	2	4	4	3	3	0	3	3	3	2	4	3	2	4	1	0	4	Q9P2I0	Q9P2I0	Homo sapiens	CPSF2_HUMAN	Cleavage and polyadenylation specificity factor subunit 2	CPSF2
2256.67	2364.14	2190.13	1791.72	2941.57	1931.6	1355.48	2020.69	2043.48	2179.75	1626.21	2905.91	2366.03	3038.81	2828.34	1332.46	710.387	2451.34	1	1	1	2	1	1	1	1	1	2	1	2	1	1	2	1	1	2	G5E9W3;Q9UKF6	G5E9W3;Q9UKF6	Homo sapiens	G5E9W3_HUMAN;CPSF3_HUMAN	Isoform of Q9UKF6, Cleavage and polyadenylation specific factor 3;Cleavage and polyadenylation specificity factor subunit 3	CPSF3
19216.1	17211.8	17531.6	18992.1	19517.6	15161.9	12582.5	19816.9	16882.1	18998.6	15022.1	16829.3	20738.5	20144.7	15566.5	14424.5	10395.9	17717.2	8	8	9	11	9	10	8	9	7	9	8	8	10	5	8	7	7	9	F8WJN3;Q16630;Q16630-2;Q16630-3	F8WJN3;Q16630;Q16630-2;Q16630-3	Homo sapiens	F8WJN3_HUMAN;CPSF6_HUMAN;CPSF6_HUMAN;CPSF6_HUMAN	Isoform of Q16630, Cleavage and polyadenylation specificity factor subunit 6;Cleavage and polyadenylation specificity factor subunit 6;Isoform of Q16630, Isoform 2 of Cleavage and polyadenylation specificity factor subunit 6;Isoform of Q16630, Isoform 3 of Cleavage and polyadenylation specificity factor subunit 6	CPSF6
15697.6	13552.8	14901.3	15521.7	16515.5	13262.9	13776.9	13496.6	15254.2	17447.2	11968.7	14490	18430.3	14229.1	16988.5	10585.2	7747.57	15820.6	12	9	9	11	11	11	8	9	7	12	8	11	10	6	11	5	7	11	Q8N684;Q8N684-2;Q8N684-3	Q8N684;Q8N684-2;Q8N684-3	Homo sapiens	CPSF7_HUMAN	Cleavage and polyadenylation specificity factor subunit 7;Isoform of Q8N684, Isoform 2 of Cleavage and polyadenylation specificity factor subunit 7;Isoform of Q8N684, Isoform 3 of Cleavage and polyadenylation specificity factor subunit 7	CPSF7
31282.2	32600.4	22853.1	25470.1	32418.9	27660.7	29659.4	25638.5	33815.9	26881	28262.7	24300.3	36351.6	27670.3	34673.8	27104.9	18413.9	19428.2	15	13	14	16	14	13	13	14	14	15	14	12	16	10	15	12	13	15	P50416	P50416	Homo sapiens	CPT1A_HUMAN	Carnitine O-palmitoyltransferase 1, liver isoform	CPT1A
5109.3	3125.8	4734.72	4710.04	3546.26	2842.99	4345.25	2672.77	2615.32	3788.44	2696.56	3649.59	4766.82	4621.66	3791.42	3539.85	5853.72	2806.55	9	8	9	9	8	8	6	7	8	9	5	8	9	4	9	6	9	8	A0A1B0GTB8;A0A1B0GV75;A0A1B0GVF3;A0A1B0GWC0;P23786	A0A1B0GTB8;A0A1B0GV75;A0A1B0GVF3;A0A1B0GWC0;P23786	Homo sapiens	A0A1B0GTB8_HUMAN;A0A1B0GV75_HUMAN;A0A1B0GVF3_HUMAN;A0A1B0GWC0_HUMAN;CPT2_HUMAN	Isoform of P23786, Carnitine palmitoyltransferase 2;Isoform of P23786, Carnitine palmitoyltransferase 2;Isoform of P23786, Carnitine palmitoyltransferase 2;Isoform of P23786, Carnitine palmitoyltransferase 2;Carnitine O-palmitoyltransferase 2, mitochondrial	CPT2
NaN	NaN	NaN	NaN	NaN	NaN	NaN	NaN	NaN	4938.99	5422.77	1810.55	NaN	NaN	4553.21	21519.1	NaN	NaN	0	0	0	0	0	0	0	0	0	1	1	1	0	0	1	1	0	0	H7C0X5;Q9H3G5	H7C0X5;Q9H3G5	Homo sapiens	H7C0X5_HUMAN;CPVL_HUMAN	Isoform of Q9H3G5, Carboxypeptidase vitellogenic like (Fragment);Probable serine carboxypeptidase CPVL	CPVL
NaN	NaN	NaN	NaN	NaN	NaN	NaN	1433.59	NaN	NaN	NaN	31.5411	NaN	NaN	554.608	1824.55	2047.31	NaN	0	0	0	0	0	0	0	4	0	0	0	2	0	0	1	2	4	0	Q8N436	Q8N436	Homo sapiens	CPXM2_HUMAN	Inactive carboxypeptidase-like protein X2	CPXM2
47642.7	NaN	537.218	1397.27	76113.9	90620	26822.8	29395	16109.8	15385.5	NaN	13305.3	17340.7	NaN	15523.5	NaN	NaN	25364.9	1	0	2	2	2	2	1	1	1	1	0	1	2	0	1	0	0	2	Q66K79;Q66K79-2;Q66K79-3	Q66K79;Q66K79-2;Q66K79-3	Homo sapiens	CBPZ_HUMAN	Carboxypeptidase Z;Isoform of Q66K79, Isoform 2 of Carboxypeptidase Z;Isoform of Q66K79, Isoform 3 of Carboxypeptidase Z	CPZ
18374	13612.8	9539.32	24949.7	17509.1	7174.76	21146.6	38308.5	16234.7	27471.4	18841	11936.4	77413.1	12004.8	38595.3	12858.2	18520.5	15836.8	6	8	7	9	6	7	6	8	7	9	8	7	9	4	10	6	9	7	P29373	P29373	Homo sapiens	RABP2_HUMAN	Cellular retinoic acid-binding protein 2	CRABP2
4298.54	3458.01	2117.66	4142.43	2729.11	4285.88	1899.77	4998.63	4540.89	2940.87	3306.25	2708.98	2977.68	1645.19	870.281	3178.75	4659.2	2906.4	2	2	2	2	1	2	2	1	2	2	2	2	2	1	1	1	2	2	P78560	P78560	Homo sapiens	CRADD_HUMAN	Death domain-containing protein CRADD	CRADD
10297.6	9273.94	7154.63	8949.86	7385.55	7146.81	10597.3	7803.31	5323.49	8112.9	10674	7534.46	10745.4	7523.09	7937.16	12324.6	10920.7	5425.95	12	11	14	13	12	12	12	13	10	13	10	11	12	2	13	8	13	10	A0A7P0TAR1;P43155;P43155-3	A0A7P0TAR1;P43155;P43155-3	Homo sapiens	A0A7P0TAR1_HUMAN;CACP_HUMAN;CACP_HUMAN	Isoform of P43155, Carnitine O-acetyltransferase;Carnitine O-acetyltransferase;Isoform of P43155, Isoform 3 of Carnitine O-acetyltransferase	CRAT
2057.42	4977.62	3290.68	3665.03	3429.67	5740.96	2667.66	3463.26	2263.01	4369.98	2921.07	3257.58	3314.23	1652.04	3848.51	969.968	4296.49	3658.92	1	1	1	1	1	1	1	1	1	1	1	1	1	1	1	1	1	1	A0A1W2PPJ5;J3QT87;Q96SW2;Q96SW2-2	A0A1W2PPJ5;J3QT87;Q96SW2;Q96SW2-2	Homo sapiens	A0A1W2PPJ5_HUMAN;J3QT87_HUMAN;CRBN_HUMAN;CRBN_HUMAN	Isoform of Q96SW2, Protein cereblon;Isoform of Q96SW2, Protein cereblon (Fragment);Protein cereblon;Isoform of Q96SW2, Isoform 2 of Protein cereblon	CRBN
11779.1	12057.5	11945.5	13294.2	10917.1	11102.2	10504.1	11064.3	6689.68	8781.98	11268.3	10438.2	9234.38	10062.9	10636.9	7528.35	5776.87	9399.47	2	2	2	2	2	2	2	2	2	2	2	2	2	2	2	2	1	2	P16220;P16220-1;P16220-3	P16220;P16220-1;P16220-3	Homo sapiens	CREB1_HUMAN	Cyclic AMP-responsive element-binding protein 1;Isoform of P16220, Isoform 2 of Cyclic AMP-responsive element-binding protein 1;Isoform of P16220, Isoform 3 of Cyclic AMP-responsive element-binding protein 1	CREB1
NaN	NaN	13302	5332.67	NaN	NaN	4163.03	NaN	3385.85	2271.22	5687.25	5650.74	2178.13	NaN	8203.18	5718.65	8280.68	NaN	0	0	1	1	0	0	1	0	1	1	1	1	1	0	1	1	1	0	A0A3B3IRL2;O75629	A0A3B3IRL2;O75629	Homo sapiens	A0A3B3IRL2_HUMAN;CREG1_HUMAN	Isoform of O75629, Cellular repressor of E1A stimulated genes 1;Protein CREG1	CREG1
[truncated: 4,454 more rows]

## Sheet: Differential protein analysis
																																						Differential protein expression analysis
[truncated: 5,059 more rows]
